# Supplementary material for: A C57BL/6 Mouse Model of SARS-CoV-2 Infection Recapitulates Age- and Sex-Based Differences in Human COVID-19 Disease and Recovery
Source: MDPI journal article supplement (doi:10.3390/vaccines11010047), 2022-12-25

# Supplementary Materials

Figure S1

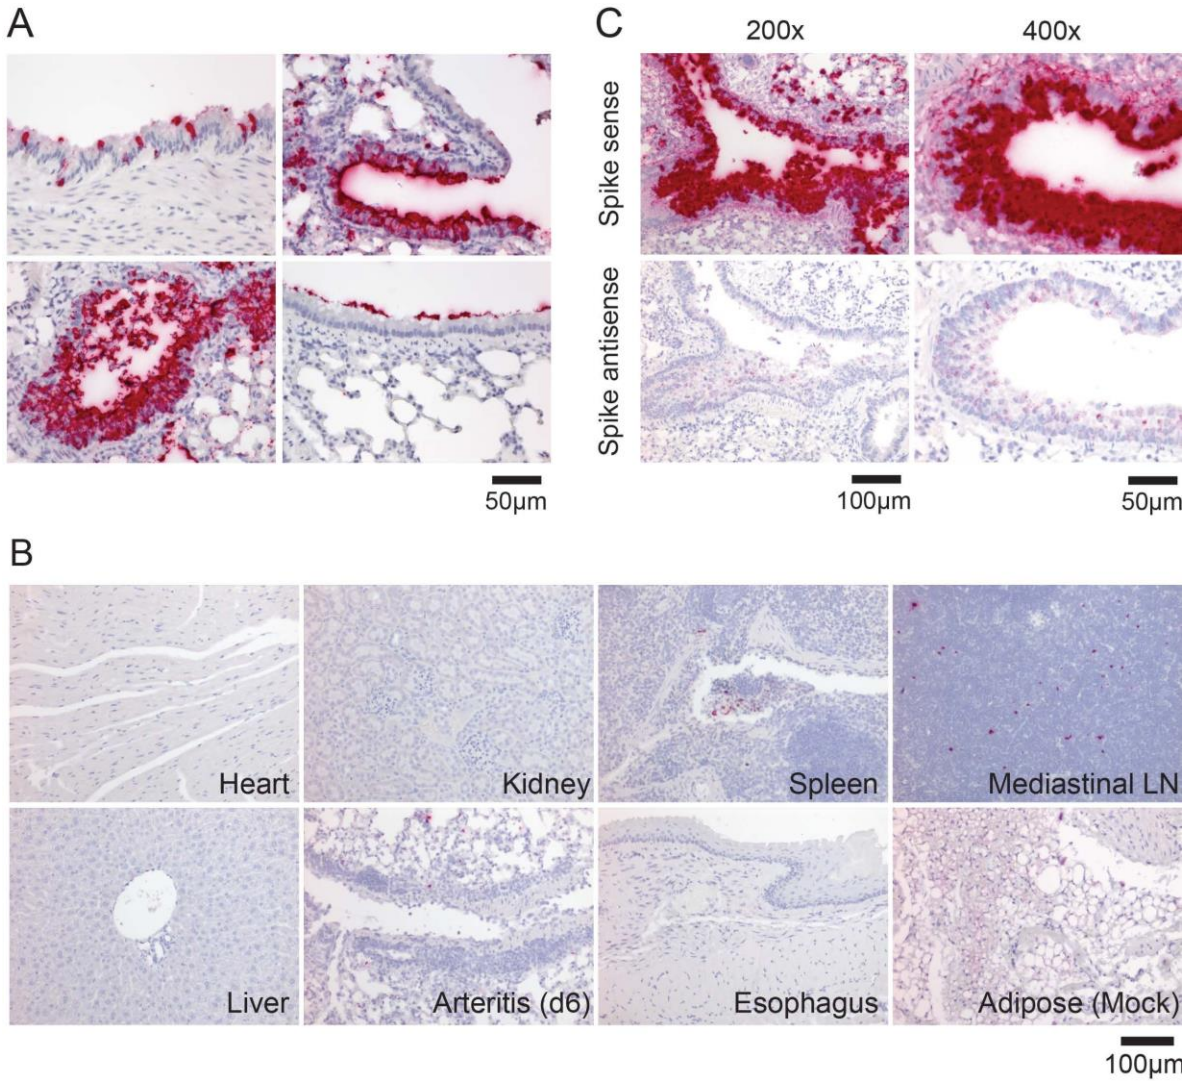

Figure S2

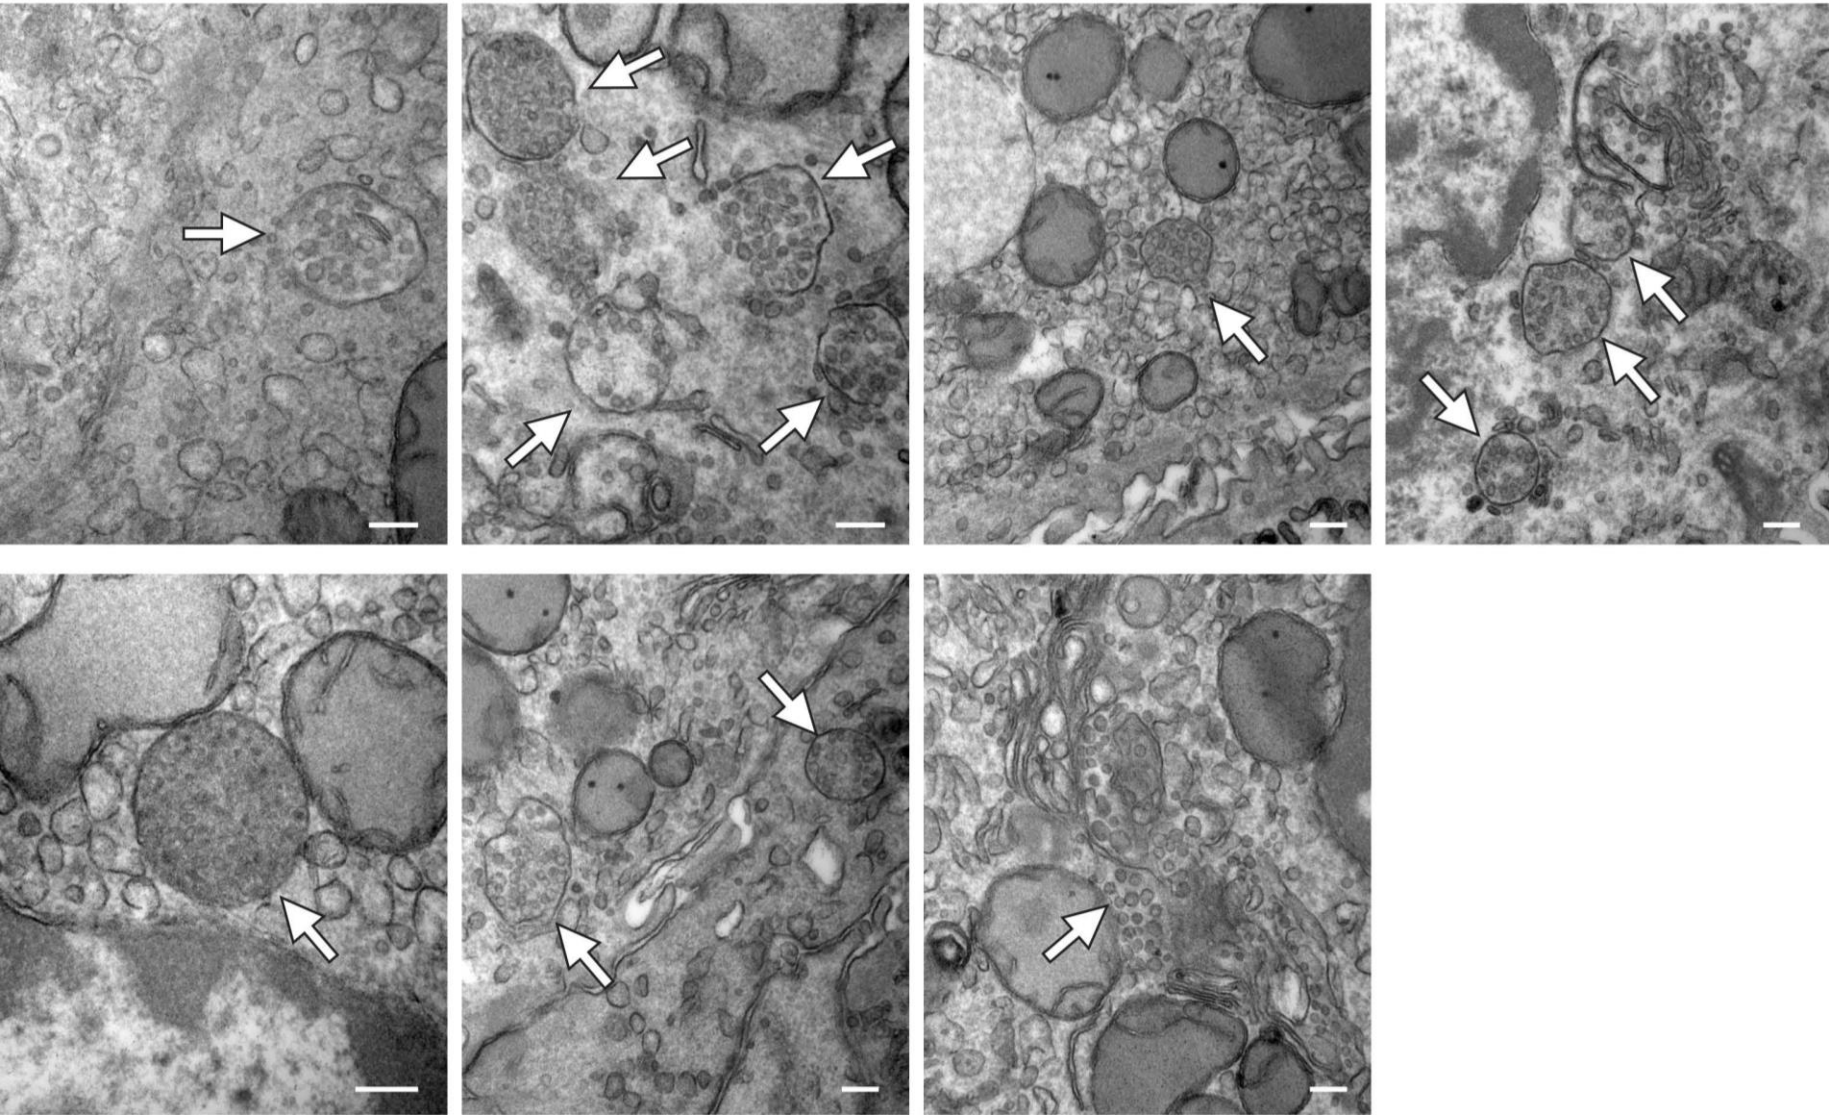

Figure S3

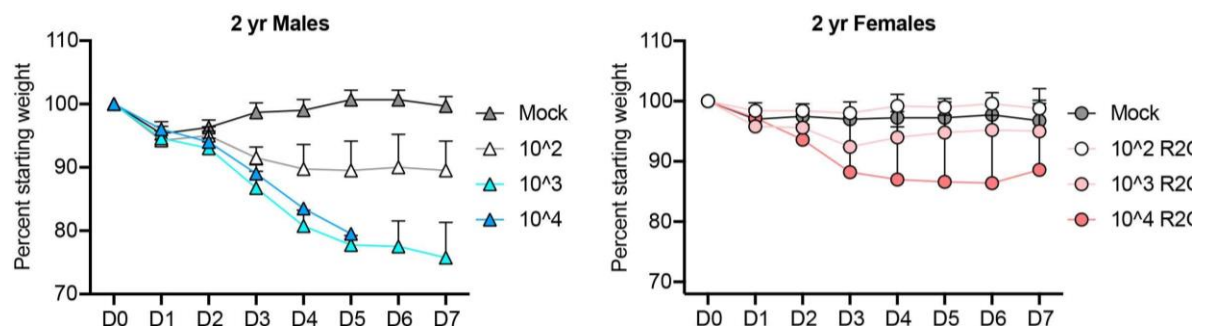



Figure S4

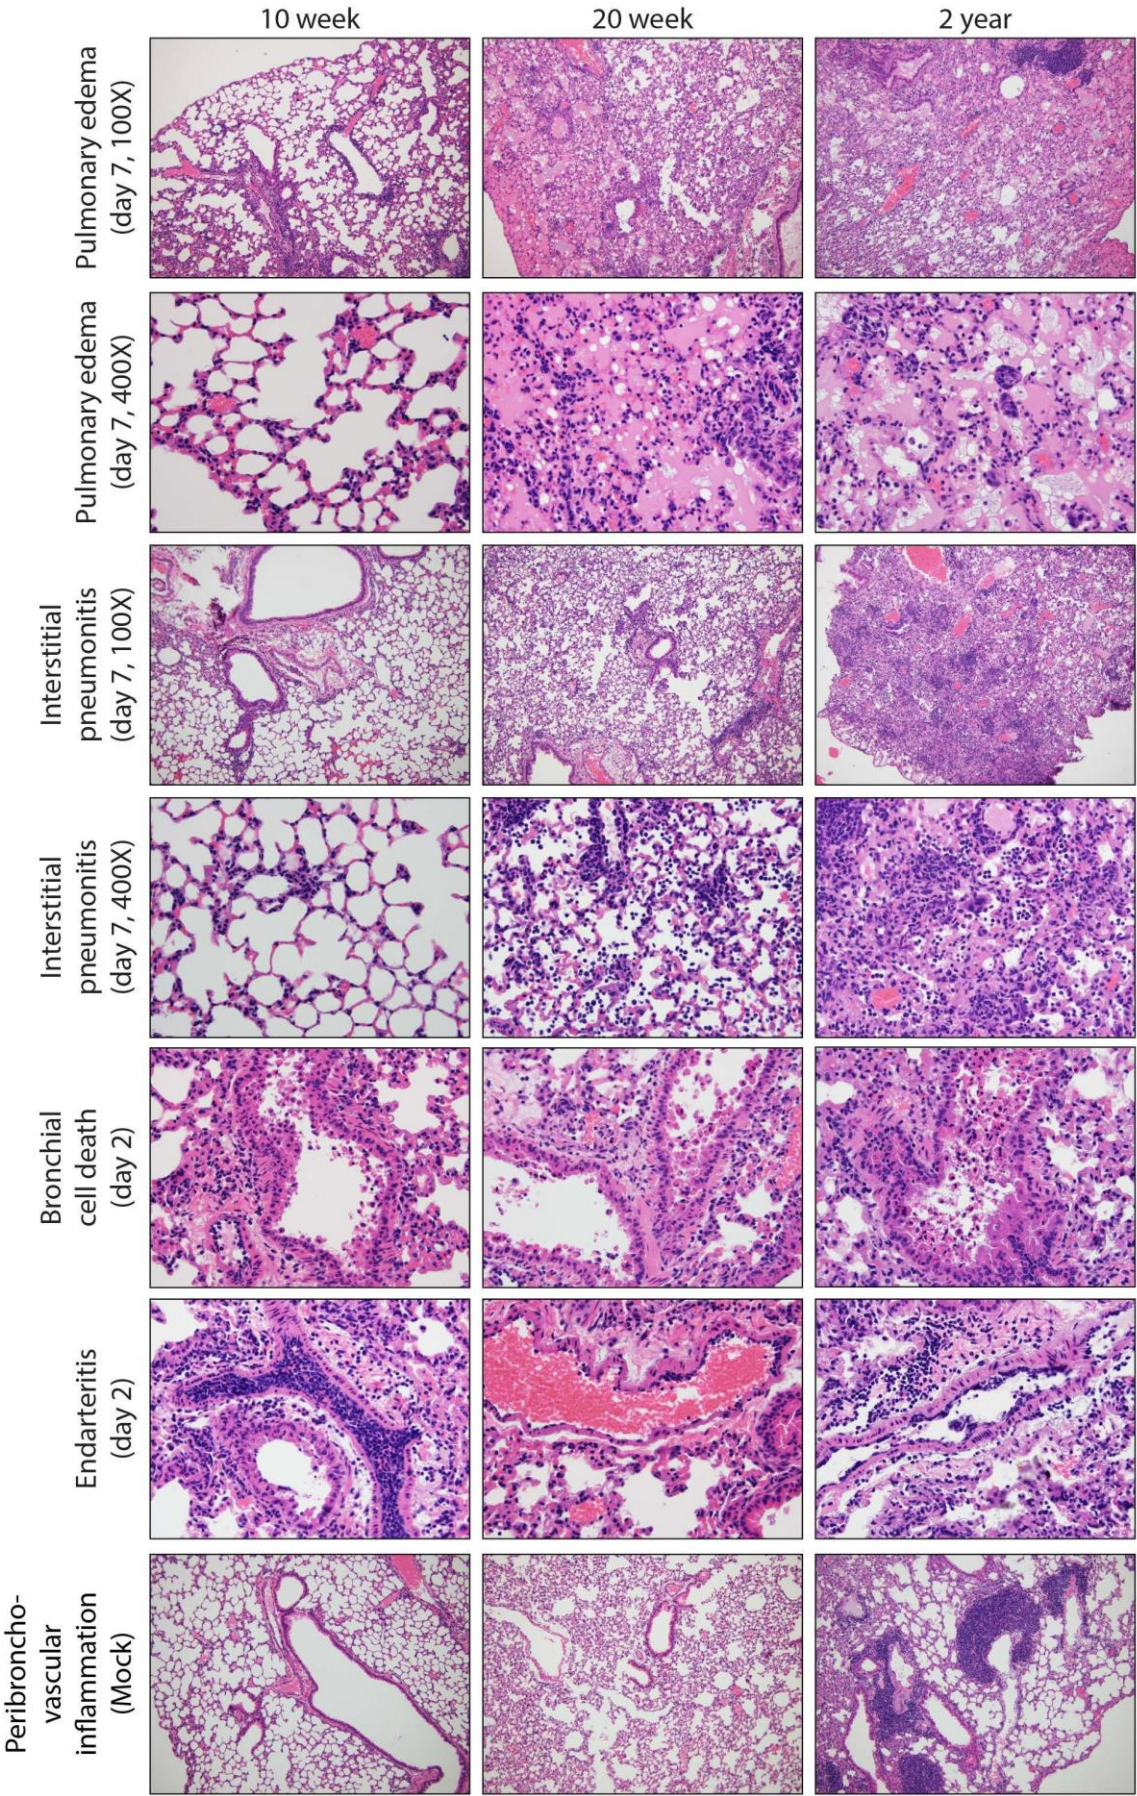



Figure S5

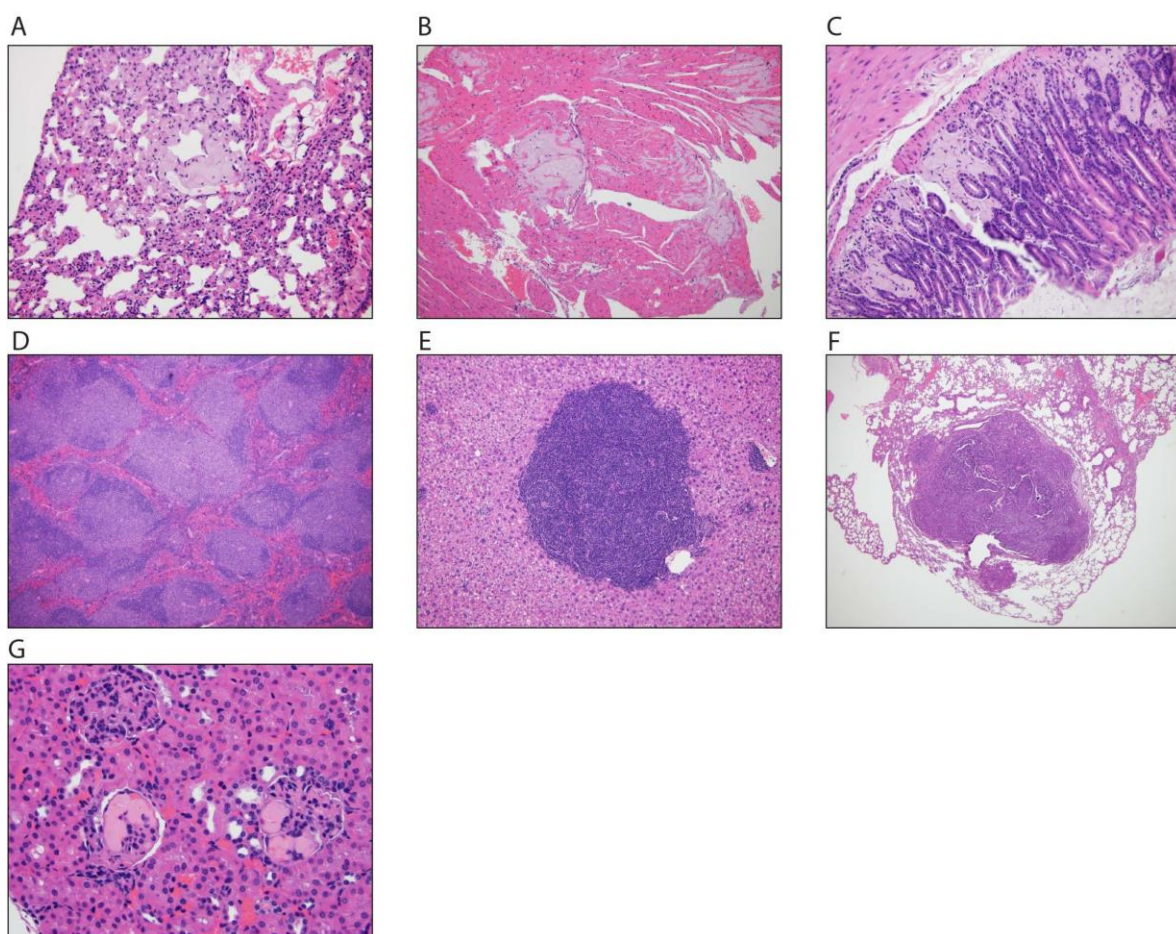

Figure S6

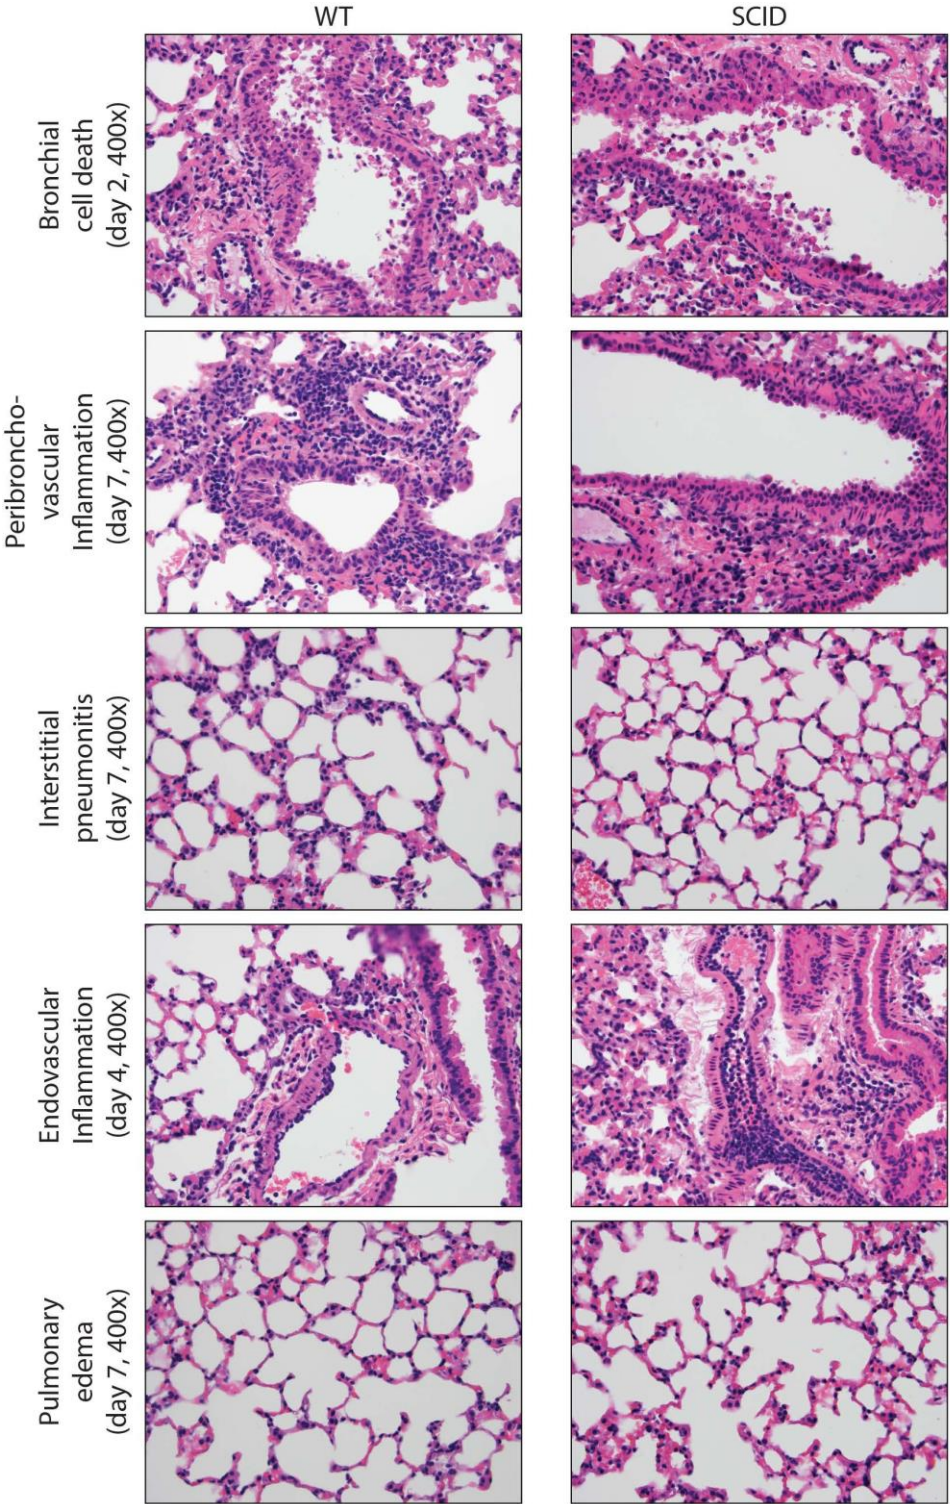



Figure S7

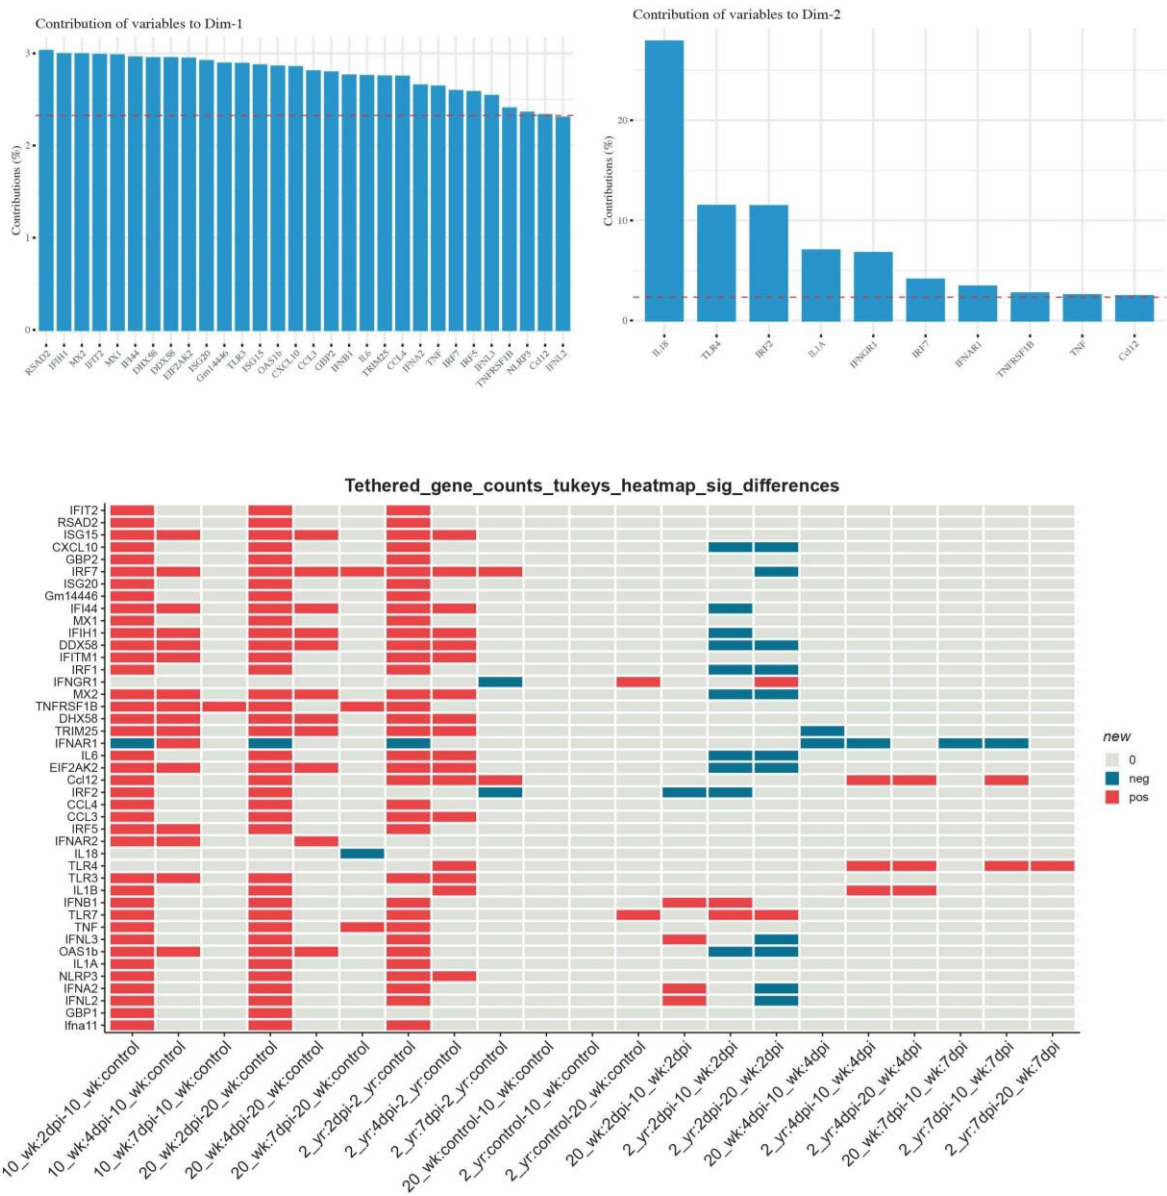

Figure S8

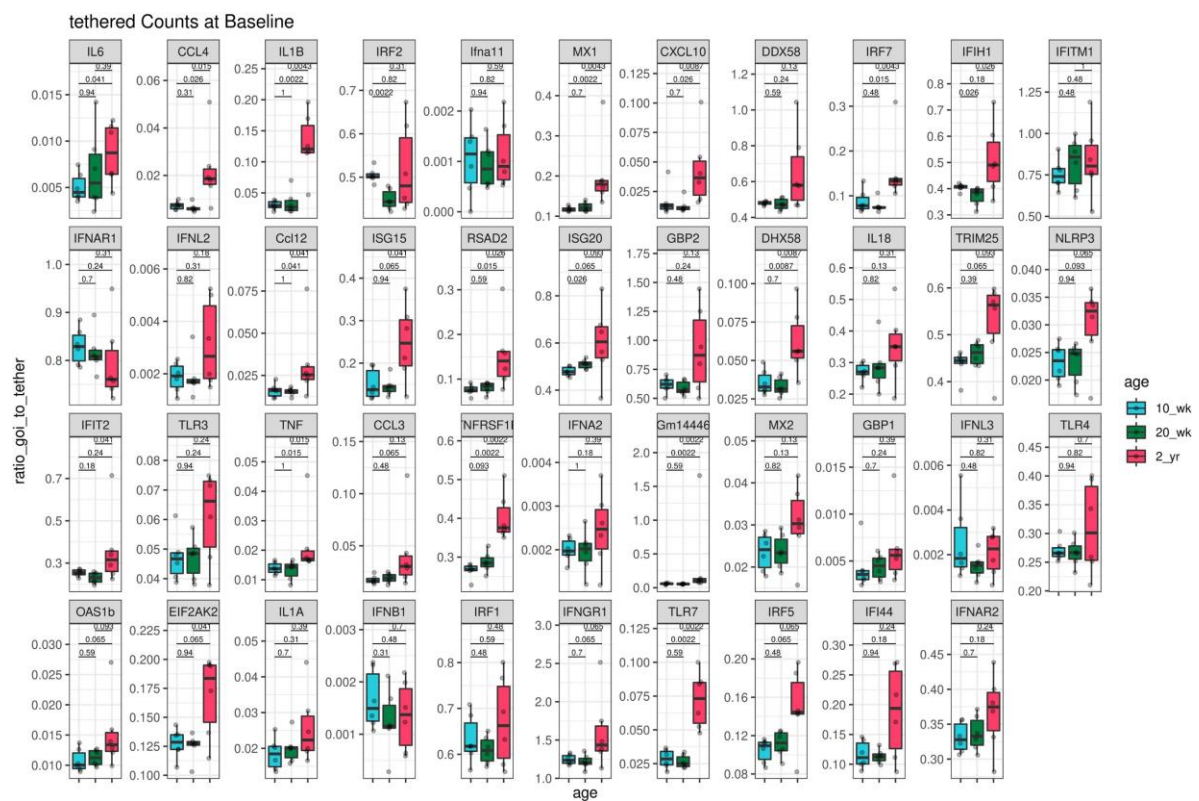

Figure S9

### Scoring of SARS-CoV-2 ISH in individual bronchial profiles

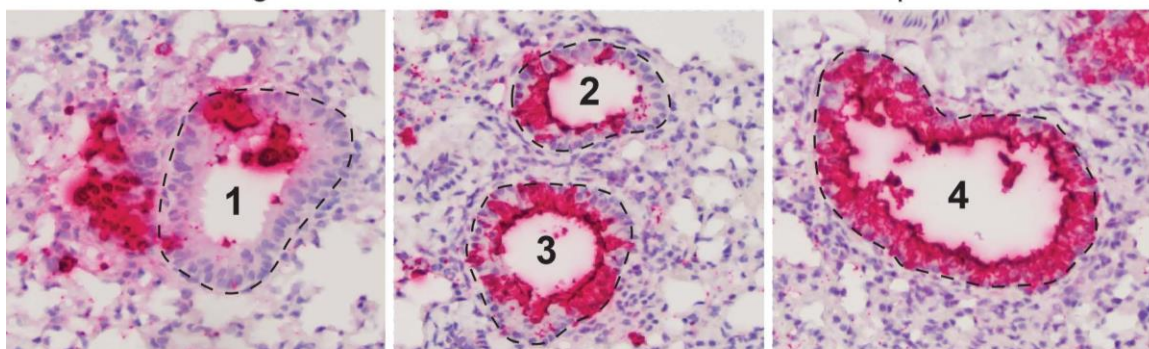

- 1: <25% of cells/profile
- 2: 25-50% of cells/profile
- 3: 50-75% of cells/profile
- 4: >75% of cells/profile



Figure S10

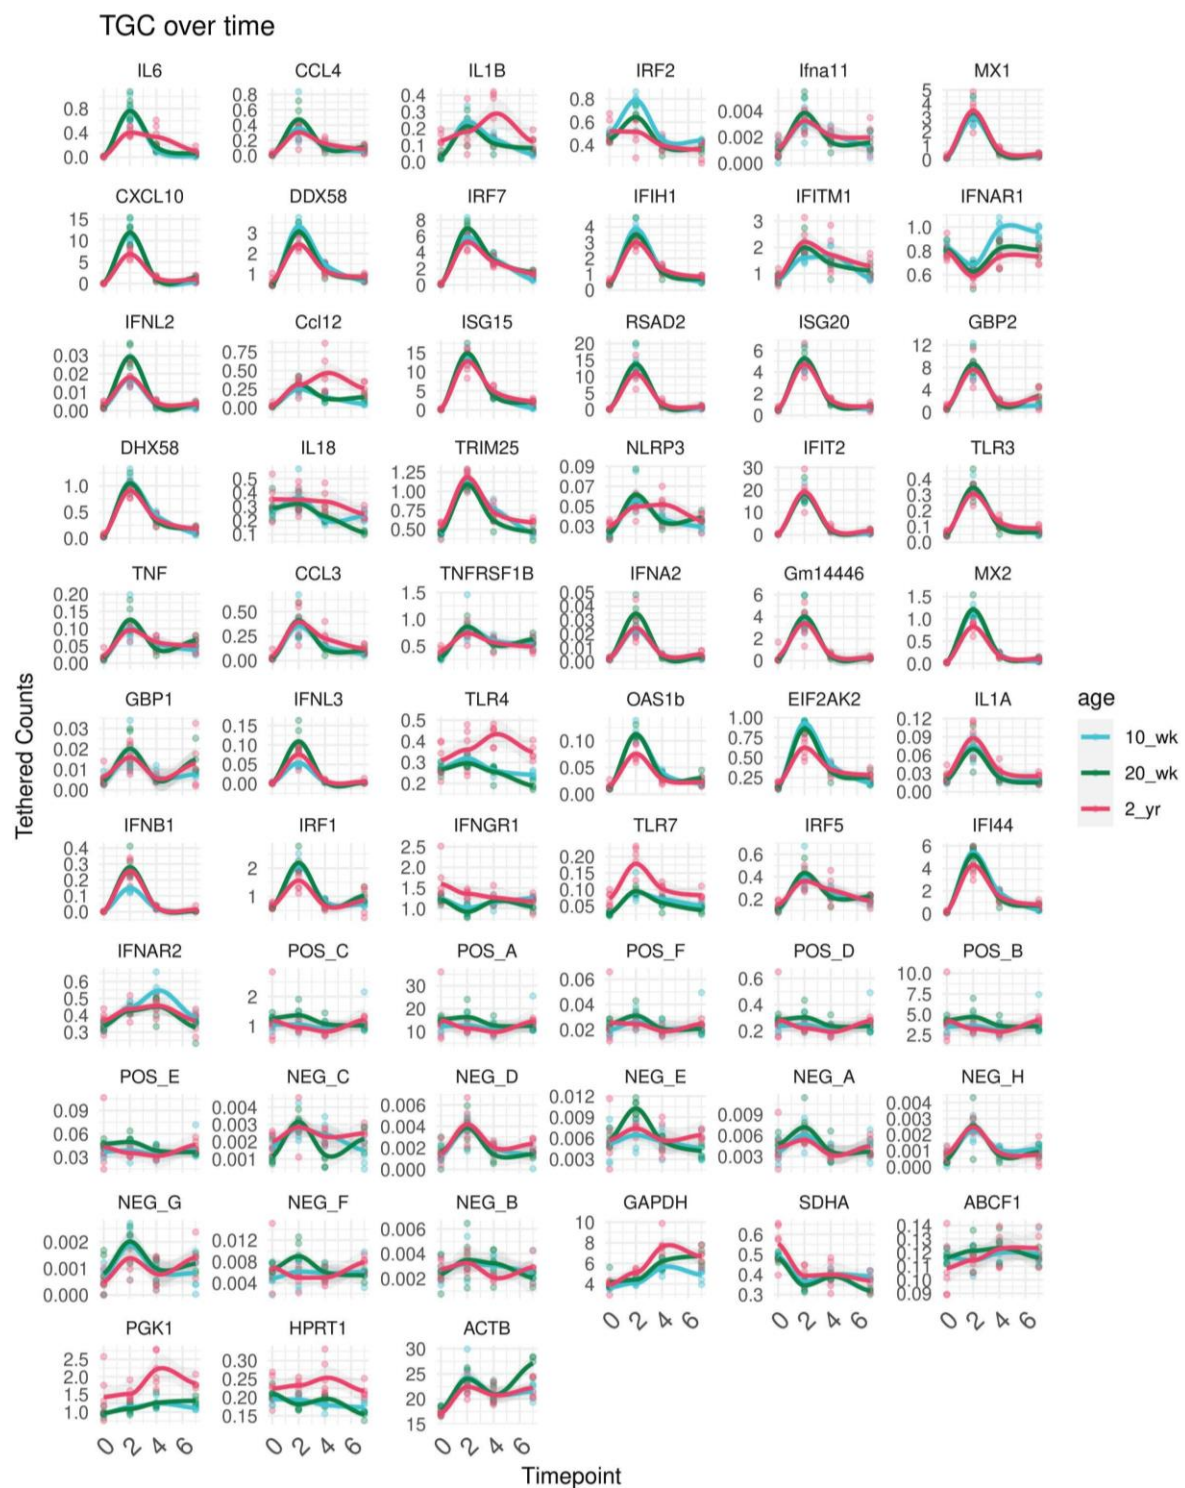

Supplement: s1 [file s1]
