# Supplementary material for: A C57BL/6 Mouse Model of SARS-CoV-2 Infection Recapitulates Age- and Sex-Based Differences in Human COVID-19 Disease and Recovery
Source: Vaccines (Basel). 2022 Dec 25;11(1):47. doi: 10.3390/vaccines11010047 (PMC9860616; doi:10.3390/vaccines11010047)
Supplement: Supplementary file 1 [file vaccines-11-00047-s001.zip]

Archive with 11 entries (11 files):
- Supplemental Table S1.xlsx
- Supplemental Table S10.csv
- Supplemental Table S2.xlsx
- Supplemental Table S3.xlsx
- Supplemental Table S4.xlsx
- Supplemental Table S5.xlsx
- Supplemental Table S6.xlsx
- Supplemental Table S7.xlsx
- Supplemental Table S8.xlsx
- Supplemental Table S9.csv
- vaccines-2104763-supplementary.pdf
