# Supplementary material for: A C57BL/6 Mouse Model of SARS-CoV-2 Infection Recapitulates Age- and Sex-Based Differences in Human COVID-19 Disease and Recovery
Source: Vaccines (Basel). 2022 Dec 25;11(1):47. doi: 10.3390/vaccines11010047 (PMC9860616; doi:10.3390/vaccines11010047)
Supplement: Supplementary file 1 [file vaccines-11-00047-s001.zip › Supplemental Table S1.xlsx]

## Sheet: Weight loss studies
			d0	d1	d2	d3	d4	d5	d6	d7
10 wk C57BL/6	Male	Mock	24.2	23.51	23.83	24.34	24.08	24.24	24.03	24.67
			30.48	30.28	29.96	30.42	30.48	30.67	30.5	30.94
			27.65	27.18	27.55	27.62	28.01	28.28	27.95	27.98
			26.17	25.43	25.44	25.65	25.99	26.11	26.86	25.57
			25.18	25.04	25.19	25.31	25.56	25.84	26.12	25.9
		10^3 MA10	26.24	26.01	25.79	25.12	24.69	25.87	26.28	26.5
			26.19	25.75	26.13	25.38	25.68	26.1	26.76	27.38
			25.08	24.53	24.67	24.2	24.1	24.6	24.47	24.41
			27.39	27.39	27.23	27.09	27.28	27.52	27.58	27.43
			25.74	24.78	24.79	24.53	25.1	25.6	25.92	26.13
		10^4 MA10	25.11	24.22	24.11	22.31	22.26	23.26	24.09	24.5
			25.52	24.78	24.45	22.39	21.58	22.92	23.81	24.14
			27.12	26.11	25.68	23.68	22.5	24.39	25.37	25.88
			24.15	23.76	23.63	21.55	21.38	22.74	23.65	24.07
			26.04	24.96	25.08	23.92	23.39	24.88	25.02	25.56
		10^5 MA10	27.38	26.87	26.68	27.38	28.26	28.64	28.17	28.45
			30.95	30.27	28.86	26.8	25.56	26.86	28.59	29.38
			28.24	27.04	26.2	24.48	23.88	25.62	26.13	26.69
			24.72	23.97	22.52	20.85	21.21	22.72	23.5	23.9
10 wk C57BL/6	Male	Mock	27.46	26.66	27.09	26.75	27.26	26.97	26.96	27.03
			28.26	27.2	27.79	27.47	27.68	28.55	27.87	28.05
			25.03	24.01	24.35	24.24	24.9	25.04	24.92	25.24
			25.7	24.8	25.42	25.27	25.76	26.73	26.39	26.42
			26.61	25.95	26.07	25.98	26.26	26.16	26.11	26.44
		10^3 R2G	25.46	24.98	25.12	24.61	24.65	25.02	25.26	25.53
			27.03	26.06	25.84	25.38	25.76	26.04	26.51	26.29
			26.17	25.43	25.39	25.35	25.46	26.16	26.12	26.26
			28.44	27.98	27.74	27.53	27.9	28.87	28.64	28.92
			27.45	26.87	27.54	27.17	27.07	27.45	27.13	27.47
		10^4 R2G	26.12	25.76	25.75	24.38	24.92	26.01	26.21	26.51
			24.07	23.49	23.49	22.56	22.88	23.49	23.64	24.55
			25.03	24.41	23.95	22.61	23.15	24.36	24.97	24.21
			24.94	24.42	24.2	23.22	23.21	24.29	24.4	24.67
			24.74	23.48	23.81	21.83	22.54	23.65	23.95	24.46
		10^5 R2G	28.11	27.48	26.19	23.97	25.34	26.82	27.6	27.65
			24.11	23.38	21.83	20.78	21.75	23.5	23.84	23.34
			25.58	24.7	23.58	22.98	23.84	24.92	25.1	24.9
			24.47	23.99	22.26	20.42	21.31	23.08	23.57	23.79
			25.15	24.22	23.07	21.18	24.43	22.8	23.6	24.26
10 wk C57BL/6	Female	Mock	21.29	20.46	20.04	20.27	20.61	20.98	20.98	20.93
			19.25	18.55	18.7	18.78	19.12	19.53	18.8	19.26
			18.67	18.05	18.15	18.12	18.37	19.3	19.66	18.84
			16.83	15.99	16.55	16.97	16.42	17.18	17.13	17.15	Untreated
			16.84	16.48	16.97	17.15	17.34	17.76	17.57	17.36	Untreated
		10^3 R2G	18.36	17.68	17.49	17.54	17.96	18.38	18.26	18.45
			18.01	17.48	17.58	17.27	17.66	17.43	18.05	18.32
			18.88	18.24	18.43	18.53	18.63	19.04	19.13	19.43
			19.34	18.59	18.49	18.49	19.12	19.73	19.77	19.8
			18.8	18.66	18.49	17.96	18.68	19.43	19.31	19.44
		10^4 R2G	20.52	20.2	19.62	18.56	19.1	20.03	20.2	20.27
			19.16	18.65	18.54	18.42	18.65	19.02	19.47	19.87
			17.87	17.23	17.98	17.68	17.62	18.3	18.12	18.37	Untreated
			19.36	18.72	18.32	17.36	18.19	18.78	18.93	18.94
			20.17	19.82	19.25	18.76	19.4	19.71	19.93	19.6
		10^5 R2G	19.93	19.17	18.26	17.56	18.28	18.97	19.25	19.55
			18.28	18	17.27	16.27	16.49	17.43	18.33	18.23
			20.09	19.74	19.21	18.19	18.84	19.55	19.79	20.12
			19.46	18.7	18.14	16.93	17.62	18.38	18.75	18.63
			18.14	17.81	16.93	15.75	16.18	17.25	17.89	18.11
10 wk C57BL/6	Male	Mock	26.64	25.87	25.61	26.15	26.38	26.54	27.08	26.7
			25.46	24.13	24.16	24.92	24.86	25.19	24.78	24.7
			28.21	26.84	26.91	27.08	27.82	27.07	27.08	27.2
			25.37	23.86	23.86	24.18	24.16	24.44	24.77	24.22
			24.73	24.36	24.55	24.73	24.93	25.12	25.27	24.87
		10^3 R2G	23.86	23.13	23.3	24.35	23.25	23.47	23.41	23.5
			25.09	24.29	24.51	24.35	24.56	24.92	24.74	24.87
			23.7	22.75	23.17	23.2	23.57	23.57	24.18	23.53
			24.24	23.46	23.61	23.91	23.73	23.8	24.62	23.99
			21.99	21.02	21.55	21.19	21.7	21.6	21.65	21.98
		10^4 R2G	25.96	24.59	24.48	23.21	24.2	24.54	24.87	25.17
			26.41	25.6	25.72	24.66	24.87	25.68	25.51	26.2
			25.51	24.34	24.52	23.4	23.73	24.41	25.45	25.29
			24.6	24.06	23.71	23.47	23.45	24.09	24.6	24.25
			23.25	22.59	22.1	20.71	21.66	22.07	22.31	22.55
		10^5 R2G	25.94	25.18	24.84	23.04	23.51	25	25.44	25.45
			24.27	23.77	23.13	21.89	23.09	23.78	23.78	24.19
			23.87	23.58	22.95	21.64	22.15	23.8	23.8	23.91
			25.36	24.68	23.85	22.15	22.54	24.63	24.08	24.83
			25.81	25.27	23.69	22.77	23.23	25.63	25.09	24.9
20 wk C57BL6	Male	Mock	31.71	30.71	30.49	30.18	30.8	30.53	30.66	30.65
			28.65	27.95	27.95	27.93	28.38	28.58	28.75	28.22
			27.71	27.43	27.36	27.67	28.29	28.07	28.01	28.13
			30.96	30.14	29.85	29.55	30	29.98	29.61	29.69
			32.71	31.87	31.91	31.48	31.99	31.76	31.32	31.16
		10^3 R2G	28.29	27.74	27.91	27.01	26.23	26.58	26.94	27.38
			26.86	25.88	26.07	25.4	24.72	24.82	25.34	24.79
			29.49	27.99	28.3	27.55	26.83	27.18	27.28	27.23
			32.38	31.48	31.78	30.57	29.41	29.34	29.28	28.89
			30.16	29.54	29.96	28.22	27.06	27.45	28.16	29.85
		10^4 R2G	29.39	28.08	27.76	25.23	24.01	24.94	25.35	26.45
			30.19	29.93	29.01	26.14	24.89	26.49	26.95	27.2
			32.23	31.34	30.92	28.17	26.82	25.35	24.16	23.53
			30.99	30.21	30.06	27.42	26.16	26.05	25.94	26.83
			33.31	31.97	31.47	28.63	27.24	25.7	24.65	24.34
		10^5 R2G	33.01	31.7	29.64	27.41	26.14	24.75	24	22.86
			31.28	30.76	28.71	26.6	24.94	23.49	22.36	21.29
			33.58	32.07	30.43	29.65	28.56	26.78	FDIC
			27.6	26.96	25.15	23.65	22.3	20.81	19.87	19.36
			34.34	33.67	31.68	30.1	28	26.62	25.94
20 wk C57BL6	Female	Mock	21.92	21.3	21.48	21.55	21.84	21.74	21.26	21.4
			24.87	23.74	23.88	24.21	24.36	24.77	24.12	24.44
			21.41	20.65	19.96	20.28	20.61	20.73	20.59	20.34
			21.42	20.83	20.98	21.15	20.43	20.93	21.4	21.75
			22.33	22.08	21.8	21.98	22.32	22.5	23.28	22.99
		10^3 R2G	20.57	20.69	20.64	20.11	19.54	20.45	20.53	20.61
			21.41	20.36	20.74	19.11	18.53	19.39	19.93	19.91
			21.5	21.48	21.31	20.3	20.37	21.14	21.38	21.24
			22.37	21.97	22.02	21.18	20.48	20.83	21.43	21.22
			22.38	22.01	22.08	21.58	21.61	21.46	21.69	21.67
		10^4 R2G	22.95	22.04	20.41	18.91	17.81	16.78	16.63	16.3
			24.5	24.33	23.41	21.41	20.93	21.46	21.92	22.38
			21.96	20.96	20.15	18.65	17.69	16.31	15.24
			23.91	23.47	22.53	21.89	21.93	22.77	23.45	23.79
			24.38	24.02	23.4	21.05	19.7	20.97	21.58	21.62
		10^5 R2G	25.26	24.07	23.06	21.33	20.24	19.5
			22.38	22.15	20.41	18.81	17.41	16.5	17.07	17.46
			21.95	21.68	19.94	18.2	17.27	16.07	15.24
			22.79	22.41	20.84	19.32	17.99	16.86	16.24	16.51
			24.89	24.11	22.04	20.57	19.27	18.04	17.47	17.41
20 wk C57BL6	Male	Mock	31.08	30.23	30.21	31.36	31.66	31.85	31.79	32.05
			32.34	30.62	30.76	31	31.24	31.31	30.88	30.98
			32.27	31.17	30.58	31.26	32.1	31.84	32.95	32.62
			30.75	29.76	29.82	30.05	31.05	31.65	31.5	31.35
			32.8	31.32	31.68	31.61	31.92	31.04	31.45	31.17
		10^3 R2G	30.5	29.32	29.16	27.12	26.38	26.85	26.87	27.56
			29.85	28.79	28.46	27.28	26.53	27.25	27.69	28.53
			33.81	32.74	31.62	31.69	31.88	32.47	32.42	32.83
			29.64	28.8	28.54	26.86	26.82	26.88	27.51	28.12
			29.63	28.68	28.58	27.53	27.27	27.51	27.95	28.2
		10^4 R2G	32.9	31.98	29.79	27.64	26.13	26.37	27.07	27.44
			33.72	32.43	31.74	28.9	27.42	26.95	28.25	29.12
			31.16	29.64	28.69	26.68	25.94	26.62	27.43	28.29
			32.71	31.18	30.33	28.48	28.95	28.67	31.05	31.6
			31.37	29.88	28.73	26.57	24.82	23.23	22.08	21.2
		10^5 R2G	28.95	28.55	26.13	24.93	23.65	22.38	21.47
			29.52	28.29	26.66	24.85	23.66	22.38
			32.06	30.77	29.27	27.08	25.53	23.72	22.83	21.76
			30.79	29.75	27.83	26.06	24.94	24.35	24.03	24.24
			29.96	29.71	27.5	25.4	24.4	25.24	26.09	27.12
2 yr C57Bl/6	Male	Mock	38.82	37.17	37.79	38.29	38.64	39.11	39.34	38.93
			34.27	33.05	33.11	34.2	34.32	34.96	34.85	34.62
			32.24	30.32	30.6	31.32	31.18	31.9	31.89	31.5
		10^2	32.74	31.14	31.15	29.48	28.2	27.94	27.86	27.69
			36.55	33.58	33.93	34.16	34.35	34.35	34.39	34.13
			33.8	32.04	32.49	31.31	30.94	31.47	32.09	31.94
			34.55	33.21
		10^2 R2G	35.14	33.53	33.65	31.47	30.47	30.38	30.3	30.09
			31.06
		10^3 R2G	35.7	34.35	33.09	31.21	28.96	27.57	26.28	25.04
			32.62	30.87	30.45	28.64	26.24	24.92	24.3	23.49
		10^3 R2G	33.21
			34.53	31.06	31.39	28.69	26.88	27.22	27.87	27.93
			32.87	31.47	31.34	29.14	27.65	26.12	26.61	26.44
			36.29	34.76
		10^4 R2G	34.51	33.12	32.63	30.94	28.96	27.76
			32.02	29.5	29.64	30.47	30.79	31.04	31.23	31.41
			33.57	32.3	30.97	29.57	27.81	26.56
			33.36	32.1	31.57
2 yr C57Bl/6	Female	Mock	25.1	24.38	24.45	24.32	24.4	24.55	24.56	24.16
			28.8	27.98	28.13	28.25	28.3	28.35	28.2	28.21
			34.98	33.73	33.67	33.45	33.95	33.71	34.25	34.02
			30.6	29.98	30.29	29.55	29.71	29.81	29.77	29.3
		10^2 R2G	29.49	28.68	28.99	29.18	29.61	29.18	29.29	29.71
			29.42	28.54	28.56	28.92	29.53	29.08	29.52	29.46
		10^2 R2G	28.09	27.98	27.93	26.79	26.95	27.33	27.37	26.43
			27.23	27.06	27.13	27.3	27.47	27.39	27.9	27.76
			27.1	26.93	26.47	26.56	26.85	26.93	27.12	26.35
		10^3 R2G	30.47	30.24	29.32	27.27	27.75	27.87	28.54	28.4
			25.36	24.03	24.54	24.94	24.67	24.75	24.9	24.71
			29.75	28.81	28.76	28.66	28.97	28.95	28.54	28.79
		10^3 R2G	25.6	24.76	24.75	23.89	24.85	25.65	25.47	25.55
			27.9	25.38	25.48	24.07	24.51	24.68	24.87	24.45
		10^4 R2G	25.25	24.86	24.27	23.83	25.44	25.44	24.92	25.54
			28.98	28.14	26.74	25.07	25.33	26.11	27	27.38
			30.29	29.65	28.84	27.19	25.42	24.87	23.82	25.52
			27.63	26.98	26.23	24.11	23.88	24.55	24.96	25.7
		10^4 R2G	26.34	25.04	23.69	21.75	20.37	18.73	18.78	18.8
2 yr C57Bl/6	Male	Mock	29.79	28.39	29.54	29.15	29.22	29.79	30.31	30.39
			30.38	29.66	30.22	30.31	30.3	30.27	30.85	30.67
		Mock	34.69	32.41	33.72	34.18	35.3	35.28	34.84	34.8
		10^3 R2G	31.63	31.73	31.47	28.38	27.23	27.18	26.97	27.16
			32.49	32.27	30.34	29.24	29.34	29.6	30.21	30.3
		10^3 R2G	33.98	33.2	32.57	29.63	27.64	26.13	26.49	26.68
			33.97	33.19	31.74	31.08	30.01	30.86	31.43	32.22
		10^4 R2G	33.66	32.63	30.64	29.16	27.32
			33.11	32.29	30.37	28.57	26.96	25.89
			29.81	29.06	27.99	25.94	24.67
		10^4 R2G	28.35	27.54	25.81	24.42	22.88	21.86
			32.25	31.18	29.17	27.82	26.34	25.15
		10^5 R2G	32.06	31.45	29.36	28.02	25.46	24.2	24.91	24.6
			33.98	32.86	30.63	28.76	26.54	25.52	25.19	25.02
			31.88	29.94	28.35	26.67	FDIC
			35.56	32.95	33.24	33.08	32.74	33.63	34	33.41
		10^5 R2G	33.81	33.45	30.28	27.62	25.95
2 yr C57Bl/6	Female	Mock	31.47	30.71	30.7	30.73	30.65	31.05	30.69	30.63
			26.22	26.03	25.95	25.87	26.3	26.15	26.11	26.1
			23.79	23.18	23.35	23.41	23.4	23.54	23.39	23.54
		10^3 R2G	28.96	28.07	27.8	26.52	26.64	27.11	27.31	27.43
			26.19	25.74	26.1	25.66
			27.12	24.68	25.72	24.73
			37.73	36.33	36.61	35.96	35.2	35.22	35.12	34.86
		10^4 R2G	26.62	25.28	23.29	22.71	23.07	24.14	24.54	24.81
			31.89	30.83	29.8	28.27	28.3	29.19	30.09	30.58
			25.87	25.28	25.63	25.9	25.72	25.82	24.93	25.3
			28.1	27.35	25.68	23.32	22.57	23.38	24.06	25.36
		10^4 R2G	29.81	27.86	26.79	25.55	23.6	23.47	22.96	23.43
			27.22	26.25	25.18	23.07	20.71	19.92	19.56	19.63
		10^5 R2G	27.86	27.43	24.59	22.55	20.93	20.49	21.09	20.63
			18.97
			30.12	29.11	28.13	24.97	24.78	24.76	24.88	25.16
			30.76	30.03	27.53	25.3	24.9	25.46	25.97	25.65
			26	26.02	23.54	21.24	20.95	21.21	21.5	21.96

## Sheet: Weights for tissue studies
					D0	D1	D2	D3	D4	D5	D6	D7
MAD.KV #7	10 wk C57BL/6	Male	Mock	1M	24.61	23.49	23.75	23.62	23.68	23.31	23.2
			10^4 MA10	1.2	26.45	25.72	25.55
				2.2	29.42	28.26	28.41
				3.2	28.49	26.84	26.65
				1.4	26.69	25.37	25.57	22.58	22.47
			10^4 MA10	2.4	26.86	26.55	26.21	24.5	25.07
				3.4	29.32	28.25	28.21	27.3	27.62
				1.6	27.82	26.85	26.83	25.84	25.76	26.8	27.62
				2.6	28.63	28.5	29.13	27.56	26.67	27.7	28.52
				3.6	27.16	25.92	25.92	24.27	23.41	23.61	24.78
MAD.KV #20	10 wk C57BL/6	Female	Mock	1M	19.55	19.24	19.35	19.35	19.19	19.01	19.54	19.38
				2M	20.55	20.27	19.89	20.18	20.73	20.37	20.13	20.2
				3M	18.64	18.65	18.56	18.79	19.1	19.09	18.71	18.42
				x	21.22	21.12	21.27	21.67	21.04	20.99	21.25	21.27
			10^4 R2G	1.2	20.09	19.65	19.67
				2.2	20.09	19.62	19.31
				3.2	21.81	21.53	20.99
				1.4	19.67	18.83	18.26	16.39	16.57
				2.4	20.49	20.43	20.08	17.55	17.98
			10^4 R2G	3.4	21.17	20.21	20.34	18.6	19.52
				1.7	19.48	18.87	18.56	16.56	17.34	19.62	20	20.38
				2.7	19.77	19.8	19.01	17.31	17.76	19.06	19.46	19.52
				3.7	22.47	21.97	21.05	19.11	19.75	20.5	21.13	20.98
MAD.KV #20	10 wk C57BL/6	Male	Mock	1M	25.81	24.8	24.9	25.84	26.34	25.95	26.47	26
				2M	25.43	25.05	24.86	25.68	25.57	25.43	25.45	25.25
				3M	27.74	27.15	27.14	27.61	27.79	27.56	27.3	27.2
				x	25.64	25.14	25.42	25.1	25.62	25.31	25.4	25.15
				x	28.3	27.55	28	27.64	28.16	27.8	27.75	27.78
			10^4 R2G	1.2	24.88	24.25	24.21
				1.4	25.38	25	24.92	22.5	23.42
				2.2	24.92	24.23	23.78
				3.2	26.6	24.6	25.18
				2.4	26.01	25.61	25.83	24.41	25.32
			10^4 R2G	3.4	27.88	27.05	27.04	24.38	25.34
				1.7	27.16	26.29	26.23	24.51	25.3	25.82	26.58	26.59
				2.7	24.31	23.96	23.62	21.11	22.24	23.13	23.39	23.11
				3.7	25.61	25.31	24.77	23.02	24.02	24.62	24.48	24.57
				x	24.58	24.12	24.52	22.28	23.6	24.46	24.32	24.08
MAD.KV #36	10 wk C57BL/6	Female	Mock	1M	19.2	18.23	18.49	18.28	18.48	18.57	18.42	18.67
				2M	18.45	18.45	18.67	18.91	19.3	18.94	18.94	19.07
				3M	19.58	18.3	18.29	18.95	19.29	19.48	18.89	19.23
			10^4 R2G	1.2	20.11	18.62	18.59
				2.2	18.49	18.11	17.67
				3.2	18.95	18.11	18.35
			10^4 R2G	1.4	19.92	18.82	18.67	18.97	19.55
				2.4	18.15	17.3	17.58	17.46	18.72
				3.4	19.66	18.93	18.79	18.51	19.23
			10^4 R2G	1.7	18.79	18.67	18.54	17.63	18.77	19.45	19.12	18.62
				2.7	16.9	16.88	15.84	15.24	16.02	16.79	17.19	16.59
				3.7	18.85	18.6	18.14	17.53	18.69	19.36	19.21	19.49
MAD.KV #36	10 wk C57BL/6	Male	Mock	1M	25.3	24.14	24.75	24.89	25.36	25.63	25.07	25.39
				2M	24.85	23.78	24.4	24.74	24.78	24.58	24.67	25.13
				3M	27.78	26.97	27.27	27.31	27.7	27.69	27.47	27.5
			10^4 R2G	1.2	25.82	25.27	25.85
				2.2	28.39	27.25	27.69
				3.4	27.37	26.13	26.07	24.78	25.45
			10^4 R2G	1.4	26.66	25.23	24.95	22.97	23.23
				2.4	26.8	25.64	26.02	25.97	26.51
			10^4 R2G	1.7	25.12	23.89	23.76	23.34	24.08	25.35	25.31	25.38
				2.7	24.6	24.2	23.79	22.09	22.94	24.17	24.38	24.75
				3.7	24.1	23	23.05	21.88	22.74	23.56	23.43	23.23
MAD.KV #21	20 wk C57BL6	Female	Mock	1M	21.85	21.34	21.99	22.39	22.4	22.21	22.88	22.81
				2M	23.1	22.86	23.3	22.72	23.52	23.73	23.86	23.62
				3M	21.74	21.34	21.61	21.59	22.21	21.59	22.02	21.86
			10^4 (D2)	1.2	20.33	20.57	19.85
				2.2	25.83	25.61	24.49
				3.2	26.78	26.25	25.9
			10^4 (D4)	1.4	26.77	26.12	25.36	23.62	23.43
				2.4	23.81	23.63	22.78	20.75	19.48
				3.4	24.03	24.29	24	23.39	23.53
			10^4 (D7)	1.7	23.89	23.49	21.94	20.72	18.66	17.63	16.72	FDIC
				2.7	24.25	23.96	23.2	20.99	19.25	18.28	18.94	18.72
				3.7	27.13	26.5	25.17	22.89	21.02	20.4	21.19	22.14
MAD.KV #21	20 wk C57BL6	Male	Mock	1M	34.27	32.5	32.87	33.41	33.77	33.91	32.28	33.65
				2M	32.77	31.51	30.95	31.25	30.94	30.94	31.16	30.84
				3M	35.87	33.6	33.72	34.32	34.34	34.4	34.36	34.53
			10^4 (D2)	1.2	31.42	30.31	29.6
				2.2	27.42	27.2	25.98
				3.2	28.88	27.63	25.81
			10^4 (D4)	1.4	28.94	28.15	26.96	25.19	23.68
				2.4	34.52	33.49	32.02	29.78	29.21
				3.4	33.63	32.25	31.96	29.48	27.18
			10^4 (D7)	1.7	32	32.18	31.01	27.44	25.29	23.92	22.65	FDIC
				2.7	33.91	33.82	32.82	30.72	29.93	29.95	26.95	29.99
				3.7	31.09	30.92	29.49	27.25	25.73	24.32	24.39	24.83
MAD.KV #40	20 wk C57BL6	Female	Mock	1M	20.52	20.42	20.6	20.56	20.78	20.52	20.84	20.96
				2M	23.41	22.72	22.18	22.48	23.03	23.18	22.72	22.79
				3M	22.58	22.49	22.46	22.54	23.16	23.32	22.45	22.52
			10^4 R2G	1.2	23.34	22.54	21.12
				2.2	20.88	20.54	19.38
				3.2	22.57	21.43	19.86
			10^4 R2G	1.4	25.24	23.51	22.69	20.54	20.99
				2.4	21.78	21.03	19.87	18.04	17.39
				3.4	24.05	23.08	23.31	21.41	21.57
			10^4 R2G	1.7	24.89	24.33	22.85	21.26	21.19	22.42	23.76	23.4
				2.7	24.4	24.23	22.43	20.81	19.59	19.16	19.09	19.43
				3.7	20.66	19.96	18.93	17.7	17.88	19.34	19.73	19.65
			10^4 R2G	x	23.23	22.15	20.73	19.03	18.67	20.42	21.02	21.42
				x	22.18	21.32	20.01	18.4	18.08	19.68	20.49	20.16
				x	21.82	21.84	20.37	18.8	18.27	18.78	19.97	20.63
MAD.KV #40	20 wk C57BL6	Male	Mock	1M	29.39	28.16	28.12	28.41	28.52	28.53	28.4	28.21
				2M	31.6	29.86	30.36	30.67	30.64	31	31.19	31.07
				3M	30.25	29.48	29.23	29.43	29.58	29.7	29.95	30.41
			10^4 R2G	1.2	29.79	28.05	27.09
				2.2	26.73	26.4	24.89
				3.2	30.7	29.45	27.39
			10^4 R2G	1.4	29.32	28.33	27.31	25.34	23.94
				2.4	29.4	28.24	27.64	25.3	24.02
				3.4	31.73	29.93	29.39	26.86	25.61
			10^4 R2G	1.7	30.51	28.9	28.9	26.49	24.88	24.35	23.4	22.8
				2.7	30.3	29.79	27.61	26.75	25	24.92	24.2	23.87
				3.7	31.81	29.9	29.05	26.94	25.85	25.74	26.06	26.11
			10^4 R2G	x	31.07	29.49	28.78	26.69	25.64	24.56	23.69	22.73
				x	32.56	31.87	30.29	28.36	26.81	25.8	24.62	24.1
				x	31.22	30.3	29.17	26.89	25.8	23.89	FDIC
MAD.KV #23	2 yr C57BL6	Female	Mock	1M	27.53	26.29	26.32	27	26.66	27.31	27.04	27.08
				2M	34.11	32.76	32.65	32.85	32.67	33.7	33.33	32.79
				3M	30.79	29.8	29.95	30.24	30.37	30.6	30.61	30.46
					28.36	27.27	27.37	27.77	27.84	27.35	27.73	27.56
			10^4 R2G	1.2	28.21	26.66	26.17
				2.2	33.58	31.82	31.43
				3.2	32.65	31.15	29.52
				1.4	29.74	28.46	27.83	25.46	23.82
				2.4	34.11	33.04	31.58	29.32	29.14
			10^4 R2G	3.4	28.38	27.23	26.2	24.41	22.93
				1.5	27.57	24.3	22.71	21.06	19.75	18.47
				1.7	29.93	28.24	26.71	24.03	22.61	23.42	23.8	24.29
			10^4 R2G	2.7	30.75	29.75	28.31	26.27	24.5	23.24	23.8	23.84
				3.7	27.37	26.48	25.01	22.82	22.65	22.69	23.66	23.79
				x	28.05	26.65	25.41	23.69	22.74	22.67	23.25	23.69
				x	26.15	25.25	23.08	21.31	21.51	22.14	22.66	22.97
MAD.KV #23	2 yr C57BL6	Male	Mock	1M	34.86	33.65	34.28	34.37	33.42	34.21	34.72	34.59
				2M	36.42	34.18	34.54	34.32	34.6	35.21	34.72	34.8
					36.25	34.44	33.63
				3M	34.22	32.1	32.19	32.95	32.83	33.47	33.5	33.64
			10^4 R2G	1.2	31.51	30.49	29.29
				2.2	32.16	29.94	28.12
				3.2	31.37	29.37	28.06
				1.4	32.27	30.24	28.74	27.41	25.78
			10^4 R2G	2.4	35.29	32.05	30.55	28.34	26.83
				3.4	33.47	32.46	30.43	28.93	27.66
				1.7	38.21	36.08	33.02	30.52	28.55	28.1	28.28	27.47
				x	35.91	33.96	33.06	32.33
			10^4 R2G	x	33.3	31.41	29.22	27.27	25.57	24.43
				x	33.59	31.41	29.4	27.84	26.52	25.71
			10^4 R2G	2.7	32.05	30.94	28.16	26.57	25.69	25.95	26.29	26.99
				x	28.82
				x	35.49	34.35	32.52	30.79	28.51
			10^4 R2G	x	29.86	27.7	25.96	24.48
				x	30.86	30.24	27.98	26.04	24.4	23.38	22.45

## Sheet: CT for 10 wk MA10
Block Type	384-Well Block
Calibration Background is expired	No
Calibration Background performed on	2020-09-28 14:48:00 PM PDT
Calibration CY5 is expired	No
Calibration CY5 performed on	2020-09-28 15:45:47 PM PDT
Calibration FAM is expired	No
Calibration FAM performed on	2020-09-28 15:22:13 PM PDT
Calibration NED is expired	No
Calibration NED performed on	2020-09-28 15:53:20 PM PDT
Calibration ROI is expired	No
Calibration ROI performed on	2020-09-28 14:40:28 PM PDT
Calibration ROX is expired	No
Calibration ROX performed on	2020-09-28 15:38:10 PM PDT
Calibration SYBR is expired	No
Calibration SYBR performed on	2020-09-28 15:14:16 PM PDT
Calibration TAMRA is expired	No
Calibration TAMRA performed on	2020-09-28 15:06:30 PM PDT
Calibration Uniformity is expired	No
Calibration Uniformity performed on	2020-09-28 14:55:32 PM PDT
Calibration VIC is expired	No
Calibration VIC performed on	2020-09-28 15:30:21 PM PDT
Chemistry	TAQMAN
Experiment Barcode
Experiment Comments
Experiment File Name	D:\Applied Biosystems\ViiA7 Software v1.2\experiments\Megan K\MAD\MK393 MAD KV7 Ms\MK393 N2.eds
Experiment Name	MK393 N2
Experiment Run End Time	2021-02-05 18:29:10 PM PST
Experiment Type	Standard Curve
Experiment User Name
Instrument Name	278882297
Instrument Serial Number	278882297
Instrument Type	ViiA 7
Passive Reference	ROX
Quantification Cycle Method	Ct
Signal Smoothing On	true
Stage/ Cycle where Analysis is performed	Stage 2, Step 2
																																				Copies/uL RNA = Quanity mean/CDNA uL/well*uL CDNA/uL RNA
Well	Well Position	Omit	Sample Name	Target Name	Task	Reporter	Quencher	CT	Ct Mean	Ct SD	Quantity	Quantity Mean	Quantity SD	Automatic Ct Threshold	Ct Threshold	Automatic Baseline	Baseline Start	Baseline End	Comments	Y-Intercept	R(superscript 2)	Slope	Efficiency	Custom1	Custom2	Custom3	Custom4	Custom5	Custom6	Sample Name	Tissue	Label	Sample Number	RNA Concentration ng/µL	uL RNA for 700ng	uL cDNA	uL DNA/well	MADKV07
1	A1	FALSE		N2	STANDARD	FAM	NFQ-MGB	10.7664	10.8921	0.108478	75000000			TRUE	0.04	TRUE	1	40		37.2585	0.9991	-3.3448	99.0543							STANDARD
2	A2	FALSE		N2	STANDARD	FAM	NFQ-MGB	10.9598	10.8921	0.108478	75000000			TRUE	0.04	TRUE	1	40		37.2585	0.9991	-3.3448	99.0543							STANDARD
3	A3	FALSE		N2	STANDARD	FAM	NFQ-MGB	11.0025	10.8921	0.108478	75000000			TRUE	0.04	TRUE	1	40		37.2585	0.9991	-3.3448	99.0543							STANDARD
4	A4	FALSE		N2	STANDARD	FAM	NFQ-MGB	10.8398	10.8921	0.108478	75000000			TRUE	0.04	TRUE	1	40		37.2585	0.9991	-3.3448	99.0543							STANDARD
25	B1	FALSE		N2	STANDARD	FAM	NFQ-MGB	14.2134	14.0857	0.114143	7500000			TRUE	0.04	TRUE	1	40		37.2585	0.9991	-3.3448	99.0543							STANDARD
26	B2	FALSE		N2	STANDARD	FAM	NFQ-MGB	14.1505	14.0857	0.114143	7500000			TRUE	0.04	TRUE	1	40		37.2585	0.9991	-3.3448	99.0543							STANDARD
27	B3	FALSE		N2	STANDARD	FAM	NFQ-MGB	13.9841	14.0857	0.114143	7500000			TRUE	0.04	TRUE	1	40		37.2585	0.9991	-3.3448	99.0543							STANDARD
28	B4	FALSE		N2	STANDARD	FAM	NFQ-MGB	13.9949	14.0857	0.114143	7500000			TRUE	0.04	TRUE	1	40		37.2585	0.9991	-3.3448	99.0543							STANDARD
49	C1	FALSE		N2	STANDARD	FAM	NFQ-MGB	17.7958	17.6306	0.20314	750000			TRUE	0.04	TRUE	1	40		37.2585	0.9991	-3.3448	99.0543							STANDARD
50	C2	FALSE		N2	STANDARD	FAM	NFQ-MGB	17.7677	17.6306	0.20314	750000			TRUE	0.04	TRUE	1	40		37.2585	0.9991	-3.3448	99.0543							STANDARD
51	C3	FALSE		N2	STANDARD	FAM	NFQ-MGB	17.606	17.6306	0.20314	750000			TRUE	0.04	TRUE	1	40		37.2585	0.9991	-3.3448	99.0543							STANDARD
52	C4	FALSE		N2	STANDARD	FAM	NFQ-MGB	17.3529	17.6306	0.20314	750000			TRUE	0.04	TRUE	1	40		37.2585	0.9991	-3.3448	99.0543							STANDARD
73	D1	FALSE		N2	STANDARD	FAM	NFQ-MGB	21.1156	21.0741	0.11133	75000			TRUE	0.04	TRUE	1	40		37.2585	0.9991	-3.3448	99.0543							STANDARD
74	D2	FALSE		N2	STANDARD	FAM	NFQ-MGB	21.0742	21.0741	0.11133	75000			TRUE	0.04	TRUE	1	40		37.2585	0.9991	-3.3448	99.0543							STANDARD
75	D3	FALSE		N2	STANDARD	FAM	NFQ-MGB	21.1848	21.0741	0.11133	75000			TRUE	0.04	TRUE	1	40		37.2585	0.9991	-3.3448	99.0543							STANDARD
76	D4	FALSE		N2	STANDARD	FAM	NFQ-MGB	20.9217	21.0741	0.11133	75000			TRUE	0.04	TRUE	1	40		37.2585	0.9991	-3.3448	99.0543							STANDARD
97	E1	FALSE		N2	STANDARD	FAM	NFQ-MGB	24.431	24.3454	0.127092	7500			TRUE	0.04	TRUE	1	40		37.2585	0.9991	-3.3448	99.0543							STANDARD
98	E2	FALSE		N2	STANDARD	FAM	NFQ-MGB	24.4174	24.3454	0.127092	7500			TRUE	0.04	TRUE	1	40		37.2585	0.9991	-3.3448	99.0543							STANDARD
99	E3	FALSE		N2	STANDARD	FAM	NFQ-MGB	24.3749	24.3454	0.127092	7500			TRUE	0.04	TRUE	1	40		37.2585	0.9991	-3.3448	99.0543							STANDARD
100	E4	FALSE		N2	STANDARD	FAM	NFQ-MGB	24.1581	24.3454	0.127092	7500			TRUE	0.04	TRUE	1	40		37.2585	0.9991	-3.3448	99.0543							STANDARD
121	F1	FALSE		N2	STANDARD	FAM	NFQ-MGB	27.8222	27.8356	0.12157	750			TRUE	0.04	TRUE	1	40		37.2585	0.9991	-3.3448	99.0543							STANDARD
122	F2	FALSE		N2	STANDARD	FAM	NFQ-MGB	27.9064	27.8356	0.12157	750			TRUE	0.04	TRUE	1	40		37.2585	0.9991	-3.3448	99.0543							STANDARD
123	F3	FALSE		N2	STANDARD	FAM	NFQ-MGB	27.9438	27.8356	0.12157	750			TRUE	0.04	TRUE	1	40		37.2585	0.9991	-3.3448	99.0543							STANDARD
124	F4	FALSE		N2	STANDARD	FAM	NFQ-MGB	27.6699	27.8356	0.12157	750			TRUE	0.04	TRUE	1	40		37.2585	0.9991	-3.3448	99.0543							STANDARD
145	G1	FALSE		N2	STANDARD	FAM	NFQ-MGB	30.9755	31.0844	0.110729	75			TRUE	0.04	TRUE	1	40		37.2585	0.9991	-3.3448	99.0543							STANDARD
146	G2	FALSE		N2	STANDARD	FAM	NFQ-MGB	31.1302	31.0844	0.110729	75			TRUE	0.04	TRUE	1	40		37.2585	0.9991	-3.3448	99.0543							STANDARD
147	G3	FALSE		N2	STANDARD	FAM	NFQ-MGB	31.0139	31.0844	0.110729	75			TRUE	0.04	TRUE	1	40		37.2585	0.9991	-3.3448	99.0543							STANDARD
148	G4	FALSE		N2	STANDARD	FAM	NFQ-MGB	31.218	31.0844	0.110729	75			TRUE	0.04	TRUE	1	40		37.2585	0.9991	-3.3448	99.0543							STANDARD
169	H1	FALSE		N2	STANDARD	FAM	NFQ-MGB	33.8764	34.048	0.404739	7.5			TRUE	0.04	TRUE	1	40		37.2585	0.9991	-3.3448	99.0543							STANDARD
170	H2	FALSE		N2	STANDARD	FAM	NFQ-MGB	33.7155	34.048	0.404739	7.5			TRUE	0.04	TRUE	1	40		37.2585	0.9991	-3.3448	99.0543							STANDARD
171	H3	FALSE		N2	STANDARD	FAM	NFQ-MGB	34.635	34.048	0.404739	7.5			TRUE	0.04	TRUE	1	40		37.2585	0.9991	-3.3448	99.0543							STANDARD
172	H4	FALSE		N2	STANDARD	FAM	NFQ-MGB	33.9652	34.048	0.404739	7.5			TRUE	0.04	TRUE	1	40		37.2585	0.9991	-3.3448	99.0543							STANDARD
340	O4	FALSE		N2	NTC	FAM	NFQ-MGB	Undetermined						TRUE	0.04	TRUE	1	40		37.2585	0.9991	-3.3448	99.0543							NTC
364	P4	FALSE		N2	NTC	FAM	NFQ-MGB	Undetermined						TRUE	0.04	TRUE	1	40		37.2585	0.9991	-3.3448	99.0543							NTC
5	A5	FALSE	Sample 1	N2	UNKNOWN	FAM	NFQ-MGB	Undetermined						TRUE	0.04	TRUE	1	40		37.2585	0.9991	-3.3448	99.0543							Sample 1	Liver	Mock	1	512.086	1.36696	215	1.5	MADKV07
29	B5	FALSE	Sample 1	N2	UNKNOWN	FAM	NFQ-MGB	Undetermined						TRUE	0.04	TRUE	1	40		37.2585	0.9991	-3.3448	99.0543							Sample 1
53	C5	FALSE	Sample 1	N2	UNKNOWN	FAM	NFQ-MGB	Undetermined						TRUE	0.04	TRUE	1	40		37.2585	0.9991	-3.3448	99.0543							Sample 1
6	A6	FALSE	Sample 2	N2	UNKNOWN	FAM	NFQ-MGB	34.5419	34.5065	0.32468	6.48904	6.76167	1.5284	TRUE	0.04	TRUE	1	40		37.2585	0.9991	-3.3448	99.0543							Sample 2	Liver	1.2	2	259.378	2.69876	215	1.5	MADKV07
30	B6	FALSE	Sample 2	N2	UNKNOWN	FAM	NFQ-MGB	34.812	34.5065	0.32468	5.38794	6.76167	1.5284	TRUE	0.04	TRUE	1	40		37.2585	0.9991	-3.3448	99.0543							Sample 2
54	C6	FALSE	Sample 2	N2	UNKNOWN	FAM	NFQ-MGB	34.1656	34.5065	0.32468	8.40804	6.76167	1.5284	TRUE	0.04	TRUE	1	40		37.2585	0.9991	-3.3448	99.0543							Sample 2
7	A7	FALSE	Sample 3	N2	UNKNOWN	FAM	NFQ-MGB	Undetermined						TRUE	0.04	TRUE	1	40		37.2585	0.9991	-3.3448	99.0543							Sample 3	Liver	1.4	3	441.618	1.58508	215	1.5	MADKV07
31	B7	FALSE	Sample 3	N2	UNKNOWN	FAM	NFQ-MGB	Undetermined						TRUE	0.04	TRUE	1	40		37.2585	0.9991	-3.3448	99.0543							Sample 3
55	C7	FALSE	Sample 3	N2	UNKNOWN	FAM	NFQ-MGB	Undetermined						TRUE	0.04	TRUE	1	40		37.2585	0.9991	-3.3448	99.0543							Sample 3
8	A8	FALSE	Sample 4	N2	UNKNOWN	FAM	NFQ-MGB	Undetermined						TRUE	0.04	TRUE	1	40		37.2585	0.9991	-3.3448	99.0543							Sample 4	Liver	1.6	4	414.757	1.68774	215	1.5	MADKV07
32	B8	FALSE	Sample 4	N2	UNKNOWN	FAM	NFQ-MGB	Undetermined						TRUE	0.04	TRUE	1	40		37.2585	0.9991	-3.3448	99.0543							Sample 4
56	C8	FALSE	Sample 4	N2	UNKNOWN	FAM	NFQ-MGB	Undetermined						TRUE	0.04	TRUE	1	40		37.2585	0.9991	-3.3448	99.0543							Sample 4
9	A9	FALSE	Sample 5	N2	UNKNOWN	FAM	NFQ-MGB	36.6462	36.7777	0.12425	1.52423	1.39578	0.120237	TRUE	0.04	TRUE	1	40		37.2585	0.9991	-3.3448	99.0543							Sample 5	Liver	2.2	5	366.275	1.91113	215	1.5	MADKV07
33	B9	FALSE	Sample 5	N2	UNKNOWN	FAM	NFQ-MGB	36.7936	36.7777	0.12425	1.37717	1.39578	0.120237	TRUE	0.04	TRUE	1	40		37.2585	0.9991	-3.3448	99.0543							Sample 5
57	C9	FALSE	Sample 5	N2	UNKNOWN	FAM	NFQ-MGB	36.8932	36.7777	0.12425	1.28592	1.39578	0.120237	TRUE	0.04	TRUE	1	40		37.2585	0.9991	-3.3448	99.0543							Sample 5
10	A10	FALSE	Sample 6	N2	UNKNOWN	FAM	NFQ-MGB	Undetermined	36.534	0.987593				TRUE	0.04	TRUE	1	40		37.2585	0.9991	-3.3448	99.0543							Sample 6	Liver	2.4	6	300.041	2.33301	215	1.5	MADKV07
34	B10	FALSE	Sample 6	N2	UNKNOWN	FAM	NFQ-MGB	37.2324	36.534	0.987593	1.01815	1.84059	1.1631	TRUE	0.04	TRUE	1	40		37.2585	0.9991	-3.3448	99.0543							Sample 6
58	C10	FALSE	Sample 6	N2	UNKNOWN	FAM	NFQ-MGB	35.8357	36.534	0.987593	2.66303	1.84059	1.1631	TRUE	0.04	TRUE	1	40		37.2585	0.9991	-3.3448	99.0543							Sample 6
11	A11	FALSE	Sample 7	N2	UNKNOWN	FAM	NFQ-MGB	Undetermined						TRUE	0.04	TRUE	1	40		37.2585	0.9991	-3.3448	99.0543							Sample 7	Liver	2.6	7	394.061	1.77637	215	1.5	MADKV07
35	B11	FALSE	Sample 7	N2	UNKNOWN	FAM	NFQ-MGB	Undetermined						TRUE	0.04	TRUE	1	40		37.2585	0.9991	-3.3448	99.0543							Sample 7
59	C11	FALSE	Sample 7	N2	UNKNOWN	FAM	NFQ-MGB	Undetermined						TRUE	0.04	TRUE	1	40		37.2585	0.9991	-3.3448	99.0543							Sample 7
12	A12	FALSE	Sample 8	N2	UNKNOWN	FAM	NFQ-MGB	35.3066	34.7124	0.515797	3.83315	5.99931	1.88344	TRUE	0.04	TRUE	1	40		37.2585	0.9991	-3.3448	99.0543							Sample 8	Liver	3.2	8	598.785	1.16903	215	1.5	MADKV07
36	B12	FALSE	Sample 8	N2	UNKNOWN	FAM	NFQ-MGB	34.3808	34.7124	0.515797	7.25016	5.99931	1.88344	TRUE	0.04	TRUE	1	40		37.2585	0.9991	-3.3448	99.0543							Sample 8
60	C12	FALSE	Sample 8	N2	UNKNOWN	FAM	NFQ-MGB	34.4496	34.7124	0.515797	6.91462	5.99931	1.88344	TRUE	0.04	TRUE	1	40		37.2585	0.9991	-3.3448	99.0543							Sample 8
13	A13	FALSE	Sample 9	N2	UNKNOWN	FAM	NFQ-MGB	Undetermined	37.5119					TRUE	0.04	TRUE	1	40		37.2585	0.9991	-3.3448	99.0543							Sample 9	Liver	3.4	9	658.007	1.06382	215	1.5	MADKV07
37	B13	FALSE	Sample 9	N2	UNKNOWN	FAM	NFQ-MGB	Undetermined	37.5119					TRUE	0.04	TRUE	1	40		37.2585	0.9991	-3.3448	99.0543							Sample 9
61	C13	FALSE	Sample 9	N2	UNKNOWN	FAM	NFQ-MGB	37.5119	37.5119		0.839953	0.839953		TRUE	0.04	TRUE	1	40		37.2585	0.9991	-3.3448	99.0543							Sample 9
14	A14	FALSE	Sample 10	N2	UNKNOWN	FAM	NFQ-MGB	Undetermined						TRUE	0.04	TRUE	1	40		37.2585	0.9991	-3.3448	99.0543							Sample 10	Liver	3.6	10	456.903	1.53205	215	1.5	MADKV07
38	B14	FALSE	Sample 10	N2	UNKNOWN	FAM	NFQ-MGB	Undetermined						TRUE	0.04	TRUE	1	40		37.2585	0.9991	-3.3448	99.0543							Sample 10
62	C14	FALSE	Sample 10	N2	UNKNOWN	FAM	NFQ-MGB	Undetermined						TRUE	0.04	TRUE	1	40		37.2585	0.9991	-3.3448	99.0543							Sample 10
15	A15	FALSE	Sample 11	N2	UNKNOWN	FAM	NFQ-MGB	Undetermined						TRUE	0.04	TRUE	1	40		37.2585	0.9991	-3.3448	99.0543							Sample 11	Kidney	Mock	11	228.299	3.06615	215	1.5	MADKV07
39	B15	FALSE	Sample 11	N2	UNKNOWN	FAM	NFQ-MGB	Undetermined						TRUE	0.04	TRUE	1	40		37.2585	0.9991	-3.3448	99.0543							Sample 11
63	C15	FALSE	Sample 11	N2	UNKNOWN	FAM	NFQ-MGB	Undetermined						TRUE	0.04	TRUE	1	40		37.2585	0.9991	-3.3448	99.0543							Sample 11
16	A16	FALSE	Sample 12	N2	UNKNOWN	FAM	NFQ-MGB	Undetermined	36.1847	0.673292				TRUE	0.04	TRUE	1	40		37.2585	0.9991	-3.3448	99.0543							Sample 12	Kidney	1.2	12	242.292	2.88908	215	1.5	MADKV07
40	B16	FALSE	Sample 12	N2	UNKNOWN	FAM	NFQ-MGB	35.7086	36.1847	0.673292	2.90646	2.20773	0.98815	TRUE	0.04	TRUE	1	40		37.2585	0.9991	-3.3448	99.0543							Sample 12
64	C16	FALSE	Sample 12	N2	UNKNOWN	FAM	NFQ-MGB	36.6608	36.1847	0.673292	1.509	2.20773	0.98815	TRUE	0.04	TRUE	1	40		37.2585	0.9991	-3.3448	99.0543							Sample 12
17	A17	FALSE	Sample 13	N2	UNKNOWN	FAM	NFQ-MGB	Undetermined	37.614					TRUE	0.04	TRUE	1	40		37.2585	0.9991	-3.3448	99.0543							Sample 13	Kidney	1.4	13	238.721	2.93229	215	1.5	MADKV07
41	B17	FALSE	Sample 13	N2	UNKNOWN	FAM	NFQ-MGB	Undetermined	37.614					TRUE	0.04	TRUE	1	40		37.2585	0.9991	-3.3448	99.0543							Sample 13
65	C17	FALSE	Sample 13	N2	UNKNOWN	FAM	NFQ-MGB	37.614	37.614		0.782922	0.782922		TRUE	0.04	TRUE	1	40		37.2585	0.9991	-3.3448	99.0543							Sample 13
18	A18	FALSE	Sample 14	N2	UNKNOWN	FAM	NFQ-MGB	Undetermined						TRUE	0.04	TRUE	1	40		37.2585	0.9991	-3.3448	99.0543							Sample 14	Kidney	1.6	14	257.399	2.71951	215	1.5	MADKV07
42	B18	FALSE	Sample 14	N2	UNKNOWN	FAM	NFQ-MGB	Undetermined						TRUE	0.04	TRUE	1	40		37.2585	0.9991	-3.3448	99.0543							Sample 14
66	C18	FALSE	Sample 14	N2	UNKNOWN	FAM	NFQ-MGB	Undetermined						TRUE	0.04	TRUE	1	40		37.2585	0.9991	-3.3448	99.0543							Sample 14
19	A19	FALSE	Sample 15	N2	UNKNOWN	FAM	NFQ-MGB	36.7487	36.9483	0.347237	1.42041	1.26064	0.278187	TRUE	0.04	TRUE	1	40		37.2585	0.9991	-3.3448	99.0543							Sample 15	Kidney	2.2	15	270.849	2.58447	215	1.5	MADKV07
43	B19	FALSE	Sample 15	N2	UNKNOWN	FAM	NFQ-MGB	36.747	36.9483	0.347237	1.4221	1.26064	0.278187	TRUE	0.04	TRUE	1	40		37.2585	0.9991	-3.3448	99.0543							Sample 15
67	C19	FALSE	Sample 15	N2	UNKNOWN	FAM	NFQ-MGB	37.3493	36.9483	0.347237	0.939423	1.26064	0.278187	TRUE	0.04	TRUE	1	40		37.2585	0.9991	-3.3448	99.0543							Sample 15
20	A20	FALSE	Sample 16	N2	UNKNOWN	FAM	NFQ-MGB	Undetermined	39.2187					TRUE	0.04	TRUE	1	40		37.2585	0.9991	-3.3448	99.0543							Sample 16	Kidney	2.4	16	252.915	2.76773	215	1.5	MADKV07
44	B20	FALSE	Sample 16	N2	UNKNOWN	FAM	NFQ-MGB	39.2187	39.2187		0.259396	0.259396		TRUE	0.04	TRUE	1	40		37.2585	0.9991	-3.3448	99.0543							Sample 16
68	C20	FALSE	Sample 16	N2	UNKNOWN	FAM	NFQ-MGB	Undetermined	39.2187					TRUE	0.04	TRUE	1	40		37.2585	0.9991	-3.3448	99.0543							Sample 16
21	A21	FALSE	Sample 17	N2	UNKNOWN	FAM	NFQ-MGB	Undetermined						TRUE	0.04	TRUE	1	40		37.2585	0.9991	-3.3448	99.0543							Sample 17	Kidney	2.6	17	211.488	3.30988	215	1.5	MADKV07
45	B21	FALSE	Sample 17	N2	UNKNOWN	FAM	NFQ-MGB	Undetermined						TRUE	0.04	TRUE	1	40		37.2585	0.9991	-3.3448	99.0543							Sample 17
69	C21	FALSE	Sample 17	N2	UNKNOWN	FAM	NFQ-MGB	Undetermined						TRUE	0.04	TRUE	1	40		37.2585	0.9991	-3.3448	99.0543							Sample 17
22	A22	FALSE	Sample 18	N2	UNKNOWN	FAM	NFQ-MGB	Undetermined	36.8839	1.11674				TRUE	0.04	TRUE	1	40		37.2585	0.9991	-3.3448	99.0543							Sample 18	Kidney	3.2	18	255.551	2.73918	215	1.5	MADKV07
46	B22	FALSE	Sample 18	N2	UNKNOWN	FAM	NFQ-MGB	36.0942	36.8839	1.11674	2.2289	1.4902	1.04469	TRUE	0.04	TRUE	1	40		37.2585	0.9991	-3.3448	99.0543							Sample 18
70	C22	FALSE	Sample 18	N2	UNKNOWN	FAM	NFQ-MGB	37.6735	36.8839	1.11674	0.751486	1.4902	1.04469	TRUE	0.04	TRUE	1	40		37.2585	0.9991	-3.3448	99.0543							Sample 18
23	A23	FALSE	Sample 19	N2	UNKNOWN	FAM	NFQ-MGB	Undetermined						TRUE	0.04	TRUE	1	40		37.2585	0.9991	-3.3448	99.0543							Sample 19	Kidney	3.4	19	397.498	1.76102	215	1.5	MADKV07
47	B23	FALSE	Sample 19	N2	UNKNOWN	FAM	NFQ-MGB	Undetermined						TRUE	0.04	TRUE	1	40		37.2585	0.9991	-3.3448	99.0543							Sample 19
71	C23	FALSE	Sample 19	N2	UNKNOWN	FAM	NFQ-MGB	Undetermined						TRUE	0.04	TRUE	1	40		37.2585	0.9991	-3.3448	99.0543							Sample 19
24	A24	FALSE	Sample 20	N2	UNKNOWN	FAM	NFQ-MGB	37.3509	37.3509		0.938388	0.938388		TRUE	0.04	TRUE	1	40		37.2585	0.9991	-3.3448	99.0543							Sample 20	Kidney	3.6	20	223.097	3.13765	215	1.5	MADKV07
48	B24	FALSE	Sample 20	N2	UNKNOWN	FAM	NFQ-MGB	Undetermined	37.3509					TRUE	0.04	TRUE	1	40		37.2585	0.9991	-3.3448	99.0543							Sample 20
72	C24	FALSE	Sample 20	N2	UNKNOWN	FAM	NFQ-MGB	Undetermined	37.3509					TRUE	0.04	TRUE	1	40		37.2585	0.9991	-3.3448	99.0543							Sample 20
77	D5	FALSE	Sample 21	N2	UNKNOWN	FAM	NFQ-MGB	Undetermined						TRUE	0.04	TRUE	1	40		37.2585	0.9991	-3.3448	99.0543							Sample 21	Spleen	Mock	21	70.947	9.86652	215	1.5	MADKV07
101	E5	FALSE	Sample 21	N2	UNKNOWN	FAM	NFQ-MGB	Undetermined						TRUE	0.04	TRUE	1	40		37.2585	0.9991	-3.3448	99.0543							Sample 21
125	F5	FALSE	Sample 21	N2	UNKNOWN	FAM	NFQ-MGB	Undetermined						TRUE	0.04	TRUE	1	40		37.2585	0.9991	-3.3448	99.0543							Sample 21
78	D6	FALSE	Sample 22	N2	UNKNOWN	FAM	NFQ-MGB	30.9285	30.8503	0.119871	78.0685	82.5787	6.96431	TRUE	0.04	TRUE	1	40		37.2585	0.9991	-3.3448	99.0543							Sample 22	Spleen	1.2	22	78.531	8.91368	215	1.5	MADKV07
102	E6	FALSE	Sample 22	N2	UNKNOWN	FAM	NFQ-MGB	30.9101	30.8503	0.119871	79.0679	82.5787	6.96431	TRUE	0.04	TRUE	1	40		37.2585	0.9991	-3.3448	99.0543							Sample 22
126	F6	FALSE	Sample 22	N2	UNKNOWN	FAM	NFQ-MGB	30.7123	30.8503	0.119871	90.5997	82.5787	6.96431	TRUE	0.04	TRUE	1	40		37.2585	0.9991	-3.3448	99.0543							Sample 22
79	D7	FALSE	Sample 23	N2	UNKNOWN	FAM	NFQ-MGB	34.536	33.9409	0.540548	6.51538	10.2526	3.50869	TRUE	0.04	TRUE	1	40		37.2585	0.9991	-3.3448	99.0543							Sample 23	Spleen	1.4	23	102.877	6.80424	215	1.5	MADKV07
103	E7	FALSE	Sample 23	N2	UNKNOWN	FAM	NFQ-MGB	33.4803	33.9409	0.540548	13.4762	10.2526	3.50869	TRUE	0.04	TRUE	1	40		37.2585	0.9991	-3.3448	99.0543							Sample 23
127	F7	FALSE	Sample 23	N2	UNKNOWN	FAM	NFQ-MGB	33.8065	33.9409	0.540548	10.7662	10.2526	3.50869	TRUE	0.04	TRUE	1	40		37.2585	0.9991	-3.3448	99.0543							Sample 23
80	D8	FALSE	Sample 24	N2	UNKNOWN	FAM	NFQ-MGB	36.6792	36.4321	0.34509	1.49007	1.80111	0.450038	TRUE	0.04	TRUE	1	40		37.2585	0.9991	-3.3448	99.0543							Sample 24	Spleen	1.6	24	189.453	3.69485	215	1.5	MADKV07
104	E8	FALSE	Sample 24	N2	UNKNOWN	FAM	NFQ-MGB	36.5793	36.4321	0.34509	1.59611	1.80111	0.450038	TRUE	0.04	TRUE	1	40		37.2585	0.9991	-3.3448	99.0543							Sample 24
128	F8	FALSE	Sample 24	N2	UNKNOWN	FAM	NFQ-MGB	36.0378	36.4321	0.34509	2.31715	1.80111	0.450038	TRUE	0.04	TRUE	1	40		37.2585	0.9991	-3.3448	99.0543							Sample 24
81	D9	FALSE	Sample 25	N2	UNKNOWN	FAM	NFQ-MGB	34.4481	34.3882	0.399407	6.92187	7.39985	2.07417	TRUE	0.04	TRUE	1	40		37.2585	0.9991	-3.3448	99.0543							Sample 25	Spleen	2.2	25	67.305	10.4004	215	1.5	MADKV07
105	E9	FALSE	Sample 25	N2	UNKNOWN	FAM	NFQ-MGB	33.9623	34.3882	0.399407	9.67128	7.39985	2.07417	TRUE	0.04	TRUE	1	40		37.2585	0.9991	-3.3448	99.0543							Sample 25
129	F9	FALSE	Sample 25	N2	UNKNOWN	FAM	NFQ-MGB	34.7543	34.3882	0.399407	5.60639	7.39985	2.07417	TRUE	0.04	TRUE	1	40		37.2585	0.9991	-3.3448	99.0543							Sample 25
82	D10	FALSE	Sample 26	N2	UNKNOWN	FAM	NFQ-MGB	35.2739	34.9097	0.318481	3.92037	5.11541	1.04935	TRUE	0.04	TRUE	1	40		37.2585	0.9991	-3.3448	99.0543							Sample 26	Spleen	2.4	26	90.772	7.71163	215	1.5	MADKV07
106	E10	FALSE	Sample 26	N2	UNKNOWN	FAM	NFQ-MGB	34.7717	34.9097	0.318481	5.53963	5.11541	1.04935	TRUE	0.04	TRUE	1	40		37.2585	0.9991	-3.3448	99.0543							Sample 26
130	F10	FALSE	Sample 26	N2	UNKNOWN	FAM	NFQ-MGB	34.6835	34.9097	0.318481	5.88625	5.11541	1.04935	TRUE	0.04	TRUE	1	40		37.2585	0.9991	-3.3448	99.0543							Sample 26
83	D11	FALSE	Sample 27	N2	UNKNOWN	FAM	NFQ-MGB	36.7365	36.466	0.863038	1.43244	1.95227	1.22848	TRUE	0.04	TRUE	1	40		37.2585	0.9991	-3.3448	99.0543							Sample 27	Spleen	2.6	27	183.046	3.82418	215	1.5	MADKV07
107	E11	FALSE	Sample 27	N2	UNKNOWN	FAM	NFQ-MGB	37.1614	36.466	0.863038	1.06917	1.95227	1.22848	TRUE	0.04	TRUE	1	40		37.2585	0.9991	-3.3448	99.0543							Sample 27
131	F11	FALSE	Sample 27	N2	UNKNOWN	FAM	NFQ-MGB	35.5001	36.466	0.863038	3.3552	1.95227	1.22848	TRUE	0.04	TRUE	1	40		37.2585	0.9991	-3.3448	99.0543							Sample 27
84	D12	FALSE	Sample 28	N2	UNKNOWN	FAM	NFQ-MGB	33.1756	33.1104	0.0598854	16.6212	17.3939	0.712446	TRUE	0.04	TRUE	1	40		37.2585	0.9991	-3.3448	99.0543							Sample 28	Spleen	3.2	28	59.464	11.7718	215	1.5	MADKV07
108	E12	FALSE	Sample 28	N2	UNKNOWN	FAM	NFQ-MGB	33.0978	33.1104	0.0598854	17.5358	17.3939	0.712446	TRUE	0.04	TRUE	1	40		37.2585	0.9991	-3.3448	99.0543							Sample 28
132	F12	FALSE	Sample 28	N2	UNKNOWN	FAM	NFQ-MGB	33.0579	33.1104	0.0598854	18.0247	17.3939	0.712446	TRUE	0.04	TRUE	1	40		37.2585	0.9991	-3.3448	99.0543							Sample 28
85	D13	FALSE	Sample 29	N2	UNKNOWN	FAM	NFQ-MGB	Undetermined	38.5444	1.31426				TRUE	0.04	TRUE	1	40		37.2585	0.9991	-3.3448	99.0543							Sample 29	Spleen	3.4	29	116.097	6.02944	215	1.5	MADKV07
109	E13	FALSE	Sample 29	N2	UNKNOWN	FAM	NFQ-MGB	39.4737	38.5444	1.31426	0.21763	0.499989	0.399316	TRUE	0.04	TRUE	1	40		37.2585	0.9991	-3.3448	99.0543							Sample 29
133	F13	FALSE	Sample 29	N2	UNKNOWN	FAM	NFQ-MGB	37.6151	38.5444	1.31426	0.782348	0.499989	0.399316	TRUE	0.04	TRUE	1	40		37.2585	0.9991	-3.3448	99.0543							Sample 29
86	D14	FALSE	Sample 30	N2	UNKNOWN	FAM	NFQ-MGB	36.9832	36.6489	0.472797	1.20866	1.56191	0.499577	TRUE	0.04	TRUE	1	40		37.2585	0.9991	-3.3448	99.0543							Sample 30	Spleen	3.6	30	98.218	7.127	215	1.5	MADKV07
110	E14	FALSE	Sample 30	N2	UNKNOWN	FAM	NFQ-MGB	36.3146	36.6489	0.472797	1.91517	1.56191	0.499577	TRUE	0.04	TRUE	1	40		37.2585	0.9991	-3.3448	99.0543							Sample 30
134	F14	FALSE	Sample 30	N2	UNKNOWN	FAM	NFQ-MGB	Undetermined	36.6489	0.472797				TRUE	0.04	TRUE	1	40		37.2585	0.9991	-3.3448	99.0543							Sample 30
87	D15	FALSE	Sample 31	N2	UNKNOWN	FAM	NFQ-MGB	Undetermined						TRUE	0.04	TRUE	1	40		37.2585	0.9991	-3.3448	99.0543							Sample 31	Heart	Mock	31	310.725	2.2528	215	1.5	MADKV07
111	E15	FALSE	Sample 31	N2	UNKNOWN	FAM	NFQ-MGB	Undetermined						TRUE	0.04	TRUE	1	40		37.2585	0.9991	-3.3448	99.0543							Sample 31
135	F15	FALSE	Sample 31	N2	UNKNOWN	FAM	NFQ-MGB	Undetermined						TRUE	0.04	TRUE	1	40		37.2585	0.9991	-3.3448	99.0543							Sample 31
88	D16	FALSE	Sample 32	N2	UNKNOWN	FAM	NFQ-MGB	35.1384	34.8629	0.528775	4.30366	5.45114	2.13619	TRUE	0.04	TRUE	1	40		37.2585	0.9991	-3.3448	99.0543							Sample 32	Heart	1.2	32	102.929	6.8008	215	1.5	MADKV07
112	E16	FALSE	Sample 32	N2	UNKNOWN	FAM	NFQ-MGB	34.2532	34.8629	0.528775	7.91586	5.45114	2.13619	TRUE	0.04	TRUE	1	40		37.2585	0.9991	-3.3448	99.0543							Sample 32
136	F16	FALSE	Sample 32	N2	UNKNOWN	FAM	NFQ-MGB	35.1969	34.8629	0.528775	4.1339	5.45114	2.13619	TRUE	0.04	TRUE	1	40		37.2585	0.9991	-3.3448	99.0543							Sample 32
89	D17	FALSE	Sample 33	N2	UNKNOWN	FAM	NFQ-MGB	35.5359	35.0686	0.409094	3.2734	4.62989	1.1948	TRUE	0.04	TRUE	1	40		37.2585	0.9991	-3.3448	99.0543							Sample 33	Heart	1.4	33	180.362	3.88108	215	1.5	MADKV07
113	E17	FALSE	Sample 33	N2	UNKNOWN	FAM	NFQ-MGB	34.8946	35.0686	0.409094	5.09014	4.62989	1.1948	TRUE	0.04	TRUE	1	40		37.2585	0.9991	-3.3448	99.0543							Sample 33
137	F17	FALSE	Sample 33	N2	UNKNOWN	FAM	NFQ-MGB	34.7753	35.0686	0.409094	5.52612	4.62989	1.1948	TRUE	0.04	TRUE	1	40		37.2585	0.9991	-3.3448	99.0543							Sample 33
90	D18	FALSE	Sample 34	N2	UNKNOWN	FAM	NFQ-MGB	Undetermined						TRUE	0.04	TRUE	1	40		37.2585	0.9991	-3.3448	99.0543							Sample 34	Heart	1.6	34	154.358	4.53491	215	1.5	MADKV07
114	E18	FALSE	Sample 34	N2	UNKNOWN	FAM	NFQ-MGB	Undetermined						TRUE	0.04	TRUE	1	40		37.2585	0.9991	-3.3448	99.0543							Sample 34
138	F18	FALSE	Sample 34	N2	UNKNOWN	FAM	NFQ-MGB	Undetermined						TRUE	0.04	TRUE	1	40		37.2585	0.9991	-3.3448	99.0543							Sample 34
91	D19	FALSE	Sample 35	N2	UNKNOWN	FAM	NFQ-MGB	32.2179	32.0935	0.113989	32.136	35.0812	2.71677	TRUE	0.04	TRUE	1	40		37.2585	0.9991	-3.3448	99.0543							Sample 35	Heart	2.2	35	115.19	6.07692	215	1.5	MADKV07
115	E19	FALSE	Sample 35	N2	UNKNOWN	FAM	NFQ-MGB	32.0685	32.0935	0.113989	35.6182	35.0812	2.71677	TRUE	0.04	TRUE	1	40		37.2585	0.9991	-3.3448	99.0543							Sample 35
139	F19	FALSE	Sample 35	N2	UNKNOWN	FAM	NFQ-MGB	31.9941	32.0935	0.113989	37.4893	35.0812	2.71677	TRUE	0.04	TRUE	1	40		37.2585	0.9991	-3.3448	99.0543							Sample 35
92	D20	FALSE	Sample 36	N2	UNKNOWN	FAM	NFQ-MGB	34.7712	35.0554	0.309252	5.54149	4.62505	0.956785	TRUE	0.04	TRUE	1	40		37.2585	0.9991	-3.3448	99.0543							Sample 36	Heart	2.4	36	184.204	3.80013	215	1.5	MADKV07
116	E20	FALSE	Sample 36	N2	UNKNOWN	FAM	NFQ-MGB	35.0101	35.0554	0.309252	4.7012	4.62505	0.956785	TRUE	0.04	TRUE	1	40		37.2585	0.9991	-3.3448	99.0543							Sample 36
140	F20	FALSE	Sample 36	N2	UNKNOWN	FAM	NFQ-MGB	35.3847	35.0554	0.309252	3.63247	4.62505	0.956785	TRUE	0.04	TRUE	1	40		37.2585	0.9991	-3.3448	99.0543							Sample 36
93	D21	FALSE	Sample 37	N2	UNKNOWN	FAM	NFQ-MGB	38.5582	38.5582		0.408718	0.408718		TRUE	0.04	TRUE	1	40		37.2585	0.9991	-3.3448	99.0543							Sample 37	Heart	2.6	37	168.132	4.1634	215	1.5	MADKV07
117	E21	FALSE	Sample 37	N2	UNKNOWN	FAM	NFQ-MGB	Undetermined	38.5582					TRUE	0.04	TRUE	1	40		37.2585	0.9991	-3.3448	99.0543							Sample 37
141	F21	FALSE	Sample 37	N2	UNKNOWN	FAM	NFQ-MGB	Undetermined	38.5582					TRUE	0.04	TRUE	1	40		37.2585	0.9991	-3.3448	99.0543							Sample 37
94	D22	FALSE	Sample 38	N2	UNKNOWN	FAM	NFQ-MGB	32.2364	32.2184	0.172533	31.7288	32.2782	3.86203	TRUE	0.04	TRUE	1	40		37.2585	0.9991	-3.3448	99.0543							Sample 38	Heart	3.2	38	207.005	3.38156	215	1.5	MADKV07
118	E22	FALSE	Sample 38	N2	UNKNOWN	FAM	NFQ-MGB	32.0375	32.2184	0.172533	36.3855	32.2782	3.86203	TRUE	0.04	TRUE	1	40		37.2585	0.9991	-3.3448	99.0543							Sample 38
142	F22	FALSE	Sample 38	N2	UNKNOWN	FAM	NFQ-MGB	32.3811	32.2184	0.172533	28.7203	32.2782	3.86203	TRUE	0.04	TRUE	1	40		37.2585	0.9991	-3.3448	99.0543							Sample 38
95	D23	FALSE	Sample 39	N2	UNKNOWN	FAM	NFQ-MGB	Undetermined						TRUE	0.04	TRUE	1	40		37.2585	0.9991	-3.3448	99.0543							Sample 39	Heart	3.4	39	170.293	4.11056	215	1.5	MADKV07
119	E23	FALSE	Sample 39	N2	UNKNOWN	FAM	NFQ-MGB	Undetermined						TRUE	0.04	TRUE	1	40		37.2585	0.9991	-3.3448	99.0543							Sample 39
143	F23	FALSE	Sample 39	N2	UNKNOWN	FAM	NFQ-MGB	Undetermined						TRUE	0.04	TRUE	1	40		37.2585	0.9991	-3.3448	99.0543							Sample 39
96	D24	FALSE	Sample 40	N2	UNKNOWN	FAM	NFQ-MGB	Undetermined						TRUE	0.04	TRUE	1	40		37.2585	0.9991	-3.3448	99.0543							Sample 40	Heart	3.6	40	137.067	5.10699	215	1.5	MADKV07
120	E24	FALSE	Sample 40	N2	UNKNOWN	FAM	NFQ-MGB	Undetermined						TRUE	0.04	TRUE	1	40		37.2585	0.9991	-3.3448	99.0543							Sample 40
144	F24	FALSE	Sample 40	N2	UNKNOWN	FAM	NFQ-MGB	Undetermined						TRUE	0.04	TRUE	1	40		37.2585	0.9991	-3.3448	99.0543							Sample 40
149	G5	FALSE	Sample 41	N2	UNKNOWN	FAM	NFQ-MGB	Undetermined						TRUE	0.04	TRUE	1	40		37.2585	0.9991	-3.3448	99.0543							Sample 41	Lung	Mock	41	58.19	12.0296	215	1.5	MADKV07
173	H5	FALSE	Sample 41	N2	UNKNOWN	FAM	NFQ-MGB	Undetermined						TRUE	0.04	TRUE	1	40		37.2585	0.9991	-3.3448	99.0543							Sample 41
197	I5	FALSE	Sample 41	N2	UNKNOWN	FAM	NFQ-MGB	Undetermined						TRUE	0.04	TRUE	1	40		37.2585	0.9991	-3.3448	99.0543							Sample 41
150	G6	FALSE	Sample 42	N2	UNKNOWN	FAM	NFQ-MGB	14.0001	13.9677	0.0377302	8986503	9191717	239759	TRUE	0.04	TRUE	1	40		37.2585	0.9991	-3.3448	99.0543							Sample 42	Lung	1.2	42	77.101	9.079	215	1.5	MADKV07
174	H6	FALSE	Sample 42	N2	UNKNOWN	FAM	NFQ-MGB	13.9766	13.9677	0.0377302	9133392	9191717	239759	TRUE	0.04	TRUE	1	40		37.2585	0.9991	-3.3448	99.0543							Sample 42
198	I6	FALSE	Sample 42	N2	UNKNOWN	FAM	NFQ-MGB	13.9263	13.9677	0.0377302	9455258	9191717	239759	TRUE	0.04	TRUE	1	40		37.2585	0.9991	-3.3448	99.0543							Sample 42
151	G7	FALSE	Sample 43	N2	UNKNOWN	FAM	NFQ-MGB	19.8107	19.8102	0.117142	164586	165003	13298.9	TRUE	0.04	TRUE	1	40		37.2585	0.9991	-3.3448	99.0543							Sample 43	Lung	1.4	43	116.954	5.98526	215	1.5	MADKV07
175	H7	FALSE	Sample 43	N2	UNKNOWN	FAM	NFQ-MGB	19.6928	19.8102	0.117142	178506	165003	13298.9	TRUE	0.04	TRUE	1	40		37.2585	0.9991	-3.3448	99.0543							Sample 43
199	I7	FALSE	Sample 43	N2	UNKNOWN	FAM	NFQ-MGB	19.9271	19.8102	0.117142	151918	165003	13298.9	TRUE	0.04	TRUE	1	40		37.2585	0.9991	-3.3448	99.0543							Sample 43
152	G8	FALSE	Sample 44	N2	UNKNOWN	FAM	NFQ-MGB	25.8083	25.8315	0.0887074	2650.3	2611.42	157.606	TRUE	0.04	TRUE	1	40		37.2585	0.9991	-3.3448	99.0543							Sample 44	Lung	1.6	44	117.37	5.96405	215	1.5	MADKV07
176	H8	FALSE	Sample 44	N2	UNKNOWN	FAM	NFQ-MGB	25.7568	25.8315	0.0887074	2745.94	2611.42	157.606	TRUE	0.04	TRUE	1	40		37.2585	0.9991	-3.3448	99.0543							Sample 44
200	I8	FALSE	Sample 44	N2	UNKNOWN	FAM	NFQ-MGB	25.9295	25.8315	0.0887074	2438.01	2611.42	157.606	TRUE	0.04	TRUE	1	40		37.2585	0.9991	-3.3448	99.0543							Sample 44
153	G9	FALSE	Sample 45	N2	UNKNOWN	FAM	NFQ-MGB	14.4009	14.421	0.0706942	6.81995e+06	6.73118e+06	324340	TRUE	0.04	TRUE	1	40		37.2585	0.9991	-3.3448	99.0543							Sample 45	Lung	2.2	45	73.137	9.57108	215	1.5	MADKV07
177	H9	FALSE	Sample 45	N2	UNKNOWN	FAM	NFQ-MGB	14.3626	14.421	0.0706942	7001889	6.73118e+06	324340	TRUE	0.04	TRUE	1	40		37.2585	0.9991	-3.3448	99.0543							Sample 45
201	I9	FALSE	Sample 45	N2	UNKNOWN	FAM	NFQ-MGB	14.4996	14.421	0.0706942	6.37169e+06	6.73118e+06	324340	TRUE	0.04	TRUE	1	40		37.2585	0.9991	-3.3448	99.0543							Sample 45
154	G10	FALSE	Sample 46	N2	UNKNOWN	FAM	NFQ-MGB	20.0496	20.036	0.10389	139623	141184	10160.5	TRUE	0.04	TRUE	1	40		37.2585	0.9991	-3.3448	99.0543							Sample 46	Lung	2.4	46	57.077	12.2641	215	1.5	MADKV07
178	H10	FALSE	Sample 46	N2	UNKNOWN	FAM	NFQ-MGB	19.9259	20.036	0.10389	152035	141184	10160.5	TRUE	0.04	TRUE	1	40		37.2585	0.9991	-3.3448	99.0543							Sample 46
202	I10	FALSE	Sample 46	N2	UNKNOWN	FAM	NFQ-MGB	20.1324	20.036	0.10389	131895	141184	10160.5	TRUE	0.04	TRUE	1	40		37.2585	0.9991	-3.3448	99.0543							Sample 46
155	G11	FALSE	Sample 47	N2	UNKNOWN	FAM	NFQ-MGB	23.0592	23.0899	0.0593949	17586.2	17228.5	696.067	TRUE	0.04	TRUE	1	40		37.2585	0.9991	-3.3448	99.0543							Sample 47	Lung	2.6	47	54.035	12.9546	215	1.5	MADKV07
179	H11	FALSE	Sample 47	N2	UNKNOWN	FAM	NFQ-MGB	23.0521	23.0899	0.0593949	17672.9	17228.5	696.067	TRUE	0.04	TRUE	1	40		37.2585	0.9991	-3.3448	99.0543							Sample 47
203	I11	FALSE	Sample 47	N2	UNKNOWN	FAM	NFQ-MGB	23.1584	23.0899	0.0593949	16426.3	17228.5	696.067	TRUE	0.04	TRUE	1	40		37.2585	0.9991	-3.3448	99.0543							Sample 47
156	G12	FALSE	Sample 48	N2	UNKNOWN	FAM	NFQ-MGB	14.2165	14.2315	0.035302	7.74307e+06	7664686	185066	TRUE	0.04	TRUE	1	40		37.2585	0.9991	-3.3448	99.0543							Sample 48	Lung	3.2	48	64.639	10.8294	215	1.5	MADKV07
180	H12	FALSE	Sample 48	N2	UNKNOWN	FAM	NFQ-MGB	14.2063	14.2315	0.035302	7797665	7664686	185066	TRUE	0.04	TRUE	1	40		37.2585	0.9991	-3.3448	99.0543							Sample 48
204	I12	FALSE	Sample 48	N2	UNKNOWN	FAM	NFQ-MGB	14.2719	14.2315	0.035302	7453328	7664686	185066	TRUE	0.04	TRUE	1	40		37.2585	0.9991	-3.3448	99.0543							Sample 48
157	G13	FALSE	Sample 49	N2	UNKNOWN	FAM	NFQ-MGB	20.6334	20.5271	0.092119	93415.7	100644	6261.77	TRUE	0.04	TRUE	1	40		37.2585	0.9991	-3.3448	99.0543							Sample 49	Lung	3.4	49	83.024	8.4313	215	1.5	MADKV07
181	H13	FALSE	Sample 49	N2	UNKNOWN	FAM	NFQ-MGB	20.4717	20.5271	0.092119	104422	100644	6261.77	TRUE	0.04	TRUE	1	40		37.2585	0.9991	-3.3448	99.0543							Sample 49
205	I13	FALSE	Sample 49	N2	UNKNOWN	FAM	NFQ-MGB	20.4762	20.5271	0.092119	104094	100644	6261.77	TRUE	0.04	TRUE	1	40		37.2585	0.9991	-3.3448	99.0543							Sample 49
158	G14	FALSE	Sample 50	N2	UNKNOWN	FAM	NFQ-MGB	23.1825	23.118	0.0558361	16155.7	16897.2	642.132	TRUE	0.04	TRUE	1	40		37.2585	0.9991	-3.3448	99.0543							Sample 50	Lung	3.6	50	130.103	5.38035	215	1.5	MADKV07
182	H14	FALSE	Sample 50	N2	UNKNOWN	FAM	NFQ-MGB	23.086	23.118	0.0558361	17265.2	16897.2	642.132	TRUE	0.04	TRUE	1	40		37.2585	0.9991	-3.3448	99.0543							Sample 50
206	I14	FALSE	Sample 50	N2	UNKNOWN	FAM	NFQ-MGB	23.0856	23.118	0.0558361	17270.6	16897.2	642.132	TRUE	0.04	TRUE	1	40		37.2585	0.9991	-3.3448	99.0543							Sample 50
159	G15	FALSE	Sample 51	N2	UNKNOWN	FAM	NFQ-MGB	Undetermined						TRUE	0.04	TRUE	1	40		37.2585	0.9991	-3.3448	99.0543							Sample 51	Duod	Mock	51	347.036	2.01708	215	1.5	MADKV07
183	H15	FALSE	Sample 51	N2	UNKNOWN	FAM	NFQ-MGB	Undetermined						TRUE	0.04	TRUE	1	40		37.2585	0.9991	-3.3448	99.0543							Sample 51
207	I15	FALSE	Sample 51	N2	UNKNOWN	FAM	NFQ-MGB	Undetermined						TRUE	0.04	TRUE	1	40		37.2585	0.9991	-3.3448	99.0543							Sample 51
160	G16	FALSE	Sample 52	N2	UNKNOWN	FAM	NFQ-MGB	35.4845	36.083	1.42031	3.39129	2.88982	1.95245	TRUE	0.04	TRUE	1	40		37.2585	0.9991	-3.3448	99.0543							Sample 52	Duod	1.2	52	263.99	2.65162	215	1.5	MADKV07
184	H16	FALSE	Sample 52	N2	UNKNOWN	FAM	NFQ-MGB	37.7047	36.083	1.42031	0.735552	2.88982	1.95245	TRUE	0.04	TRUE	1	40		37.2585	0.9991	-3.3448	99.0543							Sample 52
208	I16	FALSE	Sample 52	N2	UNKNOWN	FAM	NFQ-MGB	35.0599	36.083	1.42031	4.54262	2.88982	1.95245	TRUE	0.04	TRUE	1	40		37.2585	0.9991	-3.3448	99.0543							Sample 52
161	G17	FALSE	Sample 53	N2	UNKNOWN	FAM	NFQ-MGB	Undetermined	37.1096					TRUE	0.04	TRUE	1	40		37.2585	0.9991	-3.3448	99.0543							Sample 53	Duod	1.4	53	347.972	2.01166	215	1.5	MADKV07
185	H17	FALSE	Sample 53	N2	UNKNOWN	FAM	NFQ-MGB	Undetermined	37.1096					TRUE	0.04	TRUE	1	40		37.2585	0.9991	-3.3448	99.0543							Sample 53
209	I17	FALSE	Sample 53	N2	UNKNOWN	FAM	NFQ-MGB	37.1096	37.1096		1.10792	1.10792		TRUE	0.04	TRUE	1	40		37.2585	0.9991	-3.3448	99.0543							Sample 53
162	G18	FALSE	Sample 54	N2	UNKNOWN	FAM	NFQ-MGB	Undetermined						TRUE	0.04	TRUE	1	40		37.2585	0.9991	-3.3448	99.0543							Sample 54	Duod	1.6	54	204.376	3.42506	215	1.5	MADKV07
186	H18	FALSE	Sample 54	N2	UNKNOWN	FAM	NFQ-MGB	Undetermined						TRUE	0.04	TRUE	1	40		37.2585	0.9991	-3.3448	99.0543							Sample 54
210	I18	FALSE	Sample 54	N2	UNKNOWN	FAM	NFQ-MGB	Undetermined						TRUE	0.04	TRUE	1	40		37.2585	0.9991	-3.3448	99.0543							Sample 54
163	G19	FALSE	Sample 55	N2	UNKNOWN	FAM	NFQ-MGB	35.1105	35.5121	0.812173	4.38719	3.64632	1.65665	TRUE	0.04	TRUE	1	40		37.2585	0.9991	-3.3448	99.0543							Sample 55	Duod	2.2	55	187.186	3.7396	215	1.5	MADKV07
187	H19	FALSE	Sample 55	N2	UNKNOWN	FAM	NFQ-MGB	34.9789	35.5121	0.812173	4.80325	3.64632	1.65665	TRUE	0.04	TRUE	1	40		37.2585	0.9991	-3.3448	99.0543							Sample 55
211	I19	FALSE	Sample 55	N2	UNKNOWN	FAM	NFQ-MGB	36.4468	35.5121	0.812173	1.74853	3.64632	1.65665	TRUE	0.04	TRUE	1	40		37.2585	0.9991	-3.3448	99.0543							Sample 55
164	G20	FALSE	Sample 56	N2	UNKNOWN	FAM	NFQ-MGB	Undetermined						TRUE	0.04	TRUE	1	40		37.2585	0.9991	-3.3448	99.0543							Sample 56	Duod	2.4	56	235.592	2.97124	215	1.5	MADKV07
188	H20	FALSE	Sample 56	N2	UNKNOWN	FAM	NFQ-MGB	Undetermined						TRUE	0.04	TRUE	1	40		37.2585	0.9991	-3.3448	99.0543							Sample 56
212	I20	FALSE	Sample 56	N2	UNKNOWN	FAM	NFQ-MGB	Undetermined						TRUE	0.04	TRUE	1	40		37.2585	0.9991	-3.3448	99.0543							Sample 56
165	G21	FALSE	Sample 57	N2	UNKNOWN	FAM	NFQ-MGB	Undetermined						TRUE	0.04	TRUE	1	40		37.2585	0.9991	-3.3448	99.0543							Sample 57	Duod	2.6	57	239.17	2.92679	215	1.5	MADKV07
189	H21	FALSE	Sample 57	N2	UNKNOWN	FAM	NFQ-MGB	Undetermined						TRUE	0.04	TRUE	1	40		37.2585	0.9991	-3.3448	99.0543							Sample 57
213	I21	FALSE	Sample 57	N2	UNKNOWN	FAM	NFQ-MGB	Undetermined						TRUE	0.04	TRUE	1	40		37.2585	0.9991	-3.3448	99.0543							Sample 57
166	G22	FALSE	Sample 58	N2	UNKNOWN	FAM	NFQ-MGB	35.6844	36.1284	1.10646	2.95541	2.56233	1.49038	TRUE	0.04	TRUE	1	40		37.2585	0.9991	-3.3448	99.0543							Sample 58	Duod	3.2	58	171.411	4.08375	215	1.5	MADKV07
190	H22	FALSE	Sample 58	N2	UNKNOWN	FAM	NFQ-MGB	35.3128	36.1284	1.10646	3.81677	2.56233	1.49038	TRUE	0.04	TRUE	1	40		37.2585	0.9991	-3.3448	99.0543							Sample 58
214	I22	FALSE	Sample 58	N2	UNKNOWN	FAM	NFQ-MGB	37.3878	36.1284	1.10646	0.914805	2.56233	1.49038	TRUE	0.04	TRUE	1	40		37.2585	0.9991	-3.3448	99.0543							Sample 58
167	G23	FALSE	Sample 59	N2	UNKNOWN	FAM	NFQ-MGB	Undetermined						TRUE	0.04	TRUE	1	40		37.2585	0.9991	-3.3448	99.0543							Sample 59	Duod	3.4	59	395.339	1.77063	215	1.5	MADKV07
191	H23	FALSE	Sample 59	N2	UNKNOWN	FAM	NFQ-MGB	Undetermined						TRUE	0.04	TRUE	1	40		37.2585	0.9991	-3.3448	99.0543							Sample 59
215	I23	FALSE	Sample 59	N2	UNKNOWN	FAM	NFQ-MGB	Undetermined						TRUE	0.04	TRUE	1	40		37.2585	0.9991	-3.3448	99.0543							Sample 59
168	G24	FALSE	Sample 60	N2	UNKNOWN	FAM	NFQ-MGB	Undetermined	37.5654					TRUE	0.04	TRUE	1	40		37.2585	0.9991	-3.3448	99.0543							Sample 60	Duod	3.6	60	162.503	4.30761	215	1.5	MADKV07
192	H24	FALSE	Sample 60	N2	UNKNOWN	FAM	NFQ-MGB	Undetermined	37.5654					TRUE	0.04	TRUE	1	40		37.2585	0.9991	-3.3448	99.0543							Sample 60
216	I24	FALSE	Sample 60	N2	UNKNOWN	FAM	NFQ-MGB	37.5654	37.5654		0.809533	0.809533		TRUE	0.04	TRUE	1	40		37.2585	0.9991	-3.3448	99.0543							Sample 60
221	J5	FALSE	Sample 61	N2	UNKNOWN	FAM	NFQ-MGB	Undetermined						TRUE	0.04	TRUE	1	40		37.2585	0.9991	-3.3448	99.0543							Sample 61	Stomach	Mock	61	223.021	3.13872	215	1.5	MADKV07
245	K5	FALSE	Sample 61	N2	UNKNOWN	FAM	NFQ-MGB	Undetermined						TRUE	0.04	TRUE	1	40		37.2585	0.9991	-3.3448	99.0543							Sample 61
269	L5	FALSE	Sample 61	N2	UNKNOWN	FAM	NFQ-MGB	Undetermined						TRUE	0.04	TRUE	1	40		37.2585	0.9991	-3.3448	99.0543							Sample 61
222	J6	FALSE	Sample 62	N2	UNKNOWN	FAM	NFQ-MGB	30.6691	30.7416	0.110782	93.3347	88.9632	6.63323	TRUE	0.04	TRUE	1	40		37.2585	0.9991	-3.3448	99.0543							Sample 62	Stomach	1.2	62	236.052	2.96545	215	1.5	MADKV07
246	K6	FALSE	Sample 62	N2	UNKNOWN	FAM	NFQ-MGB	30.6865	30.7416	0.110782	92.2242	88.9632	6.63323	TRUE	0.04	TRUE	1	40		37.2585	0.9991	-3.3448	99.0543							Sample 62
270	L6	FALSE	Sample 62	N2	UNKNOWN	FAM	NFQ-MGB	30.8691	30.7416	0.110782	81.3307	88.9632	6.63323	TRUE	0.04	TRUE	1	40		37.2585	0.9991	-3.3448	99.0543							Sample 62
223	J7	FALSE	Sample 63	N2	UNKNOWN	FAM	NFQ-MGB	36.7348	36.5765	0.490695	1.43411	1.66362	0.591783	TRUE	0.04	TRUE	1	40		37.2585	0.9991	-3.3448	99.0543							Sample 63	Stomach	1.4	63	317.446	2.2051	215	1.5	MADKV07
247	K7	FALSE	Sample 63	N2	UNKNOWN	FAM	NFQ-MGB	36.9685	36.5765	0.490695	1.22098	1.66362	0.591783	TRUE	0.04	TRUE	1	40		37.2585	0.9991	-3.3448	99.0543							Sample 63
271	L7	FALSE	Sample 63	N2	UNKNOWN	FAM	NFQ-MGB	36.0262	36.5765	0.490695	2.33579	1.66362	0.591783	TRUE	0.04	TRUE	1	40		37.2585	0.9991	-3.3448	99.0543							Sample 63
224	J8	FALSE	Sample 64	N2	UNKNOWN	FAM	NFQ-MGB	35.7408	35.5593	0.342591	2.84278	3.28375	0.818363	TRUE	0.04	TRUE	1	40		37.2585	0.9991	-3.3448	99.0543							Sample 64	Stomach	1.6	64	162.539	4.30666	215	1.5	MADKV07
248	K8	FALSE	Sample 64	N2	UNKNOWN	FAM	NFQ-MGB	35.773	35.5593	0.342591	2.78045	3.28375	0.818363	TRUE	0.04	TRUE	1	40		37.2585	0.9991	-3.3448	99.0543							Sample 64
272	L8	FALSE	Sample 64	N2	UNKNOWN	FAM	NFQ-MGB	35.1642	35.5593	0.342591	4.22803	3.28375	0.818363	TRUE	0.04	TRUE	1	40		37.2585	0.9991	-3.3448	99.0543							Sample 64
225	J9	FALSE	Sample 65	N2	UNKNOWN	FAM	NFQ-MGB	30.7822	30.776	0.107413	86.3442	86.8704	6.43947	TRUE	0.04	TRUE	1	40		37.2585	0.9991	-3.3448	99.0543							Sample 65	Stomach	2.2	65	129.11	5.42173	215	1.5	MADKV07
249	K9	FALSE	Sample 65	N2	UNKNOWN	FAM	NFQ-MGB	30.6656	30.776	0.107413	93.5568	86.8704	6.43947	TRUE	0.04	TRUE	1	40		37.2585	0.9991	-3.3448	99.0543							Sample 65
273	L9	FALSE	Sample 65	N2	UNKNOWN	FAM	NFQ-MGB	30.8802	30.776	0.107413	80.7101	86.8704	6.43947	TRUE	0.04	TRUE	1	40		37.2585	0.9991	-3.3448	99.0543							Sample 65
226	J10	FALSE	Sample 66	N2	UNKNOWN	FAM	NFQ-MGB	35.4049	35.3372	0.476375	3.58249	3.89225	1.30048	TRUE	0.04	TRUE	1	40		37.2585	0.9991	-3.3448	99.0543							Sample 66	Stomach	2.4	66	533.285	1.31262	215	1.5	MADKV07
250	K10	FALSE	Sample 66	N2	UNKNOWN	FAM	NFQ-MGB	35.7761	35.3372	0.476375	2.77462	3.89225	1.30048	TRUE	0.04	TRUE	1	40		37.2585	0.9991	-3.3448	99.0543							Sample 66
274	L10	FALSE	Sample 66	N2	UNKNOWN	FAM	NFQ-MGB	34.8306	35.3372	0.476375	5.31965	3.89225	1.30048	TRUE	0.04	TRUE	1	40		37.2585	0.9991	-3.3448	99.0543							Sample 66
227	J11	FALSE	Sample 67	N2	UNKNOWN	FAM	NFQ-MGB	37.1561	37.5808	0.686404	1.07304	0.856288	0.34002	TRUE	0.04	TRUE	1	40		37.2585	0.9991	-3.3448	99.0543							Sample 67	Stomach	2.6	67	255.549	2.7392	215	1.5	MADKV07
251	K11	FALSE	Sample 67	N2	UNKNOWN	FAM	NFQ-MGB	38.3727	37.5808	0.686404	0.464402	0.856288	0.34002	TRUE	0.04	TRUE	1	40		37.2585	0.9991	-3.3448	99.0543							Sample 67
275	L11	FALSE	Sample 67	N2	UNKNOWN	FAM	NFQ-MGB	37.2136	37.5808	0.686404	1.03142	0.856288	0.34002	TRUE	0.04	TRUE	1	40		37.2585	0.9991	-3.3448	99.0543							Sample 67
228	J12	FALSE	Sample 68	N2	UNKNOWN	FAM	NFQ-MGB	30.1357	30.1719	0.163626	134.743	131.979	14.5778	TRUE	0.04	TRUE	1	40		37.2585	0.9991	-3.3448	99.0543							Sample 68	Stomach	3.2	68	164.593	4.25291	215	1.5	MADKV07
252	K12	FALSE	Sample 68	N2	UNKNOWN	FAM	NFQ-MGB	30.0294	30.1719	0.163626	144.977	131.979	14.5778	TRUE	0.04	TRUE	1	40		37.2585	0.9991	-3.3448	99.0543							Sample 68
276	L12	FALSE	Sample 68	N2	UNKNOWN	FAM	NFQ-MGB	30.3506	30.1719	0.163626	116.217	131.979	14.5778	TRUE	0.04	TRUE	1	40		37.2585	0.9991	-3.3448	99.0543							Sample 68
229	J13	FALSE	Sample 69	N2	UNKNOWN	FAM	NFQ-MGB	36.965	36.605	0.33847	1.22388	1.59614	0.360436	TRUE	0.04	TRUE	1	40		37.2585	0.9991	-3.3448	99.0543							Sample 69	Stomach	3.4	69	110.648	6.32637	215	1.5	MADKV07
253	K13	FALSE	Sample 69	N2	UNKNOWN	FAM	NFQ-MGB	36.5567	36.605	0.33847	1.62108	1.59614	0.360436	TRUE	0.04	TRUE	1	40		37.2585	0.9991	-3.3448	99.0543							Sample 69
277	L13	FALSE	Sample 69	N2	UNKNOWN	FAM	NFQ-MGB	36.2933	36.605	0.33847	1.94345	1.59614	0.360436	TRUE	0.04	TRUE	1	40		37.2585	0.9991	-3.3448	99.0543							Sample 69
230	J14	FALSE	Sample 70	N2	UNKNOWN	FAM	NFQ-MGB	35.8855	36.3425	0.646364	2.5733	1.97241	0.849789	TRUE	0.04	TRUE	1	40		37.2585	0.9991	-3.3448	99.0543							Sample 70	Stomach	3.6	70	238.961	2.92935	215	1.5	MADKV07
254	K14	FALSE	Sample 70	N2	UNKNOWN	FAM	NFQ-MGB	36.7996	36.3425	0.646364	1.37152	1.97241	0.849789	TRUE	0.04	TRUE	1	40		37.2585	0.9991	-3.3448	99.0543							Sample 70
278	L14	FALSE	Sample 70	N2	UNKNOWN	FAM	NFQ-MGB	Undetermined	36.3425	0.646364				TRUE	0.04	TRUE	1	40		37.2585	0.9991	-3.3448	99.0543							Sample 70
231	J15	FALSE	Sample 71	N2	UNKNOWN	FAM	NFQ-MGB	Undetermined						TRUE	0.04	TRUE	1	40		37.2585	0.9991	-3.3448	99.0543							Sample 71	Jeju	Mock	71	80.163	8.73221	215	1.5	MADKV07
255	K15	FALSE	Sample 71	N2	UNKNOWN	FAM	NFQ-MGB	Undetermined						TRUE	0.04	TRUE	1	40		37.2585	0.9991	-3.3448	99.0543							Sample 71
279	L15	FALSE	Sample 71	N2	UNKNOWN	FAM	NFQ-MGB	Undetermined						TRUE	0.04	TRUE	1	40		37.2585	0.9991	-3.3448	99.0543							Sample 71
232	J16	FALSE	Sample 72	N2	UNKNOWN	FAM	NFQ-MGB	36.5775	36.0954	0.420405	1.59812	2.28642	0.602768	TRUE	0.04	TRUE	1	40		37.2585	0.9991	-3.3448	99.0543							Sample 72	Jeju	1.2	72	149.511	4.68193	215	1.5	MADKV07
256	K16	FALSE	Sample 72	N2	UNKNOWN	FAM	NFQ-MGB	35.8049	36.0954	0.420405	2.72008	2.28642	0.602768	TRUE	0.04	TRUE	1	40		37.2585	0.9991	-3.3448	99.0543							Sample 72
280	L16	FALSE	Sample 72	N2	UNKNOWN	FAM	NFQ-MGB	35.9038	36.0954	0.420405	2.54106	2.28642	0.602768	TRUE	0.04	TRUE	1	40		37.2585	0.9991	-3.3448	99.0543							Sample 72
233	J17	FALSE	Sample 73	N2	UNKNOWN	FAM	NFQ-MGB	Undetermined	36.0056	0.229576				TRUE	0.04	TRUE	1	40		37.2585	0.9991	-3.3448	99.0543							Sample 73	Jeju	1.4	73	113.887	6.14644	215	1.5	MADKV07
257	K17	FALSE	Sample 73	N2	UNKNOWN	FAM	NFQ-MGB	36.168	36.0056	0.229576	2.11855	2.38385	0.375187	TRUE	0.04	TRUE	1	40		37.2585	0.9991	-3.3448	99.0543							Sample 73
281	L17	FALSE	Sample 73	N2	UNKNOWN	FAM	NFQ-MGB	35.8433	36.0056	0.229576	2.64914	2.38385	0.375187	TRUE	0.04	TRUE	1	40		37.2585	0.9991	-3.3448	99.0543							Sample 73
234	J18	FALSE	Sample 74	N2	UNKNOWN	FAM	NFQ-MGB	Undetermined						TRUE	0.04	TRUE	1	40		37.2585	0.9991	-3.3448	99.0543							Sample 74	Jeju	1.6	74	116.636	6.00158	215	1.5	MADKV07
258	K18	FALSE	Sample 74	N2	UNKNOWN	FAM	NFQ-MGB	Undetermined						TRUE	0.04	TRUE	1	40		37.2585	0.9991	-3.3448	99.0543							Sample 74
282	L18	FALSE	Sample 74	N2	UNKNOWN	FAM	NFQ-MGB	Undetermined						TRUE	0.04	TRUE	1	40		37.2585	0.9991	-3.3448	99.0543							Sample 74
235	J19	FALSE	Sample 75	N2	UNKNOWN	FAM	NFQ-MGB	Undetermined						TRUE	0.04	TRUE	1	40		37.2585	0.9991	-3.3448	99.0543							Sample 75	Jeju	2.2	75	170.419	4.10752	215	1.5	MADKV07
259	K19	FALSE	Sample 75	N2	UNKNOWN	FAM	NFQ-MGB	Undetermined						TRUE	0.04	TRUE	1	40		37.2585	0.9991	-3.3448	99.0543							Sample 75
283	L19	FALSE	Sample 75	N2	UNKNOWN	FAM	NFQ-MGB	Undetermined						TRUE	0.04	TRUE	1	40		37.2585	0.9991	-3.3448	99.0543							Sample 75
236	J20	FALSE	Sample 76	N2	UNKNOWN	FAM	NFQ-MGB	37.7356	36.8807	1.20908	0.720039	1.52827	1.14301	TRUE	0.04	TRUE	1	40		37.2585	0.9991	-3.3448	99.0543							Sample 76	Jeju	2.4	76	114.336	6.12231	215	1.5	MADKV07
260	K20	FALSE	Sample 76	N2	UNKNOWN	FAM	NFQ-MGB	Undetermined	36.8807	1.20908				TRUE	0.04	TRUE	1	40		37.2585	0.9991	-3.3448	99.0543							Sample 76
284	L20	FALSE	Sample 76	N2	UNKNOWN	FAM	NFQ-MGB	36.0257	36.8807	1.20908	2.3365	1.52827	1.14301	TRUE	0.04	TRUE	1	40		37.2585	0.9991	-3.3448	99.0543							Sample 76
237	J21	FALSE	Sample 77	N2	UNKNOWN	FAM	NFQ-MGB	Undetermined						TRUE	0.04	TRUE	1	40		37.2585	0.9991	-3.3448	99.0543							Sample 77	Jeju	2.6	77	213.79	3.27424	215	1.5	MADKV07
261	K21	FALSE	Sample 77	N2	UNKNOWN	FAM	NFQ-MGB	Undetermined						TRUE	0.04	TRUE	1	40		37.2585	0.9991	-3.3448	99.0543							Sample 77
285	L21	FALSE	Sample 77	N2	UNKNOWN	FAM	NFQ-MGB	Undetermined						TRUE	0.04	TRUE	1	40		37.2585	0.9991	-3.3448	99.0543							Sample 77
238	J22	FALSE	Sample 78	N2	UNKNOWN	FAM	NFQ-MGB	34.2139	34.1778	0.383974	8.13319	8.53504	2.2765	TRUE	0.04	TRUE	1	40		37.2585	0.9991	-3.3448	99.0543							Sample 78	Jeju	3.2	78	175.304	3.99306	215	1.5	MADKV07
262	K22	FALSE	Sample 78	N2	UNKNOWN	FAM	NFQ-MGB	34.5425	34.1778	0.383974	6.48623	8.53504	2.2765	TRUE	0.04	TRUE	1	40		37.2585	0.9991	-3.3448	99.0543							Sample 78
286	L22	FALSE	Sample 78	N2	UNKNOWN	FAM	NFQ-MGB	33.7771	34.1778	0.383974	10.9857	8.53504	2.2765	TRUE	0.04	TRUE	1	40		37.2585	0.9991	-3.3448	99.0543							Sample 78
239	J23	FALSE	Sample 79	N2	UNKNOWN	FAM	NFQ-MGB	Undetermined	38.593					TRUE	0.04	TRUE	1	40		37.2585	0.9991	-3.3448	99.0543							Sample 79	Jeju	3.4	79	146.996	4.76203	215	1.5	MADKV07
263	K23	FALSE	Sample 79	N2	UNKNOWN	FAM	NFQ-MGB	38.593	38.593		0.399053	0.399053		TRUE	0.04	TRUE	1	40		37.2585	0.9991	-3.3448	99.0543							Sample 79
287	L23	FALSE	Sample 79	N2	UNKNOWN	FAM	NFQ-MGB	Undetermined	38.593					TRUE	0.04	TRUE	1	40		37.2585	0.9991	-3.3448	99.0543							Sample 79
240	J24	FALSE	Sample 80	N2	UNKNOWN	FAM	NFQ-MGB	Undetermined						TRUE	0.04	TRUE	1	40		37.2585	0.9991	-3.3448	99.0543							Sample 80	Jeju	3.6	80	303.012	2.31014	215	1.5	MADKV07
264	K24	FALSE	Sample 80	N2	UNKNOWN	FAM	NFQ-MGB	Undetermined						TRUE	0.04	TRUE	1	40		37.2585	0.9991	-3.3448	99.0543							Sample 80
288	L24	FALSE	Sample 80	N2	UNKNOWN	FAM	NFQ-MGB	Undetermined						TRUE	0.04	TRUE	1	40		37.2585	0.9991	-3.3448	99.0543							Sample 80
293	M5	FALSE	Sample 81	N2	UNKNOWN	FAM	NFQ-MGB	Undetermined						TRUE	0.04	TRUE	1	40		37.2585	0.9991	-3.3448	99.0543							Sample 81	CeC	Mock	81	152.262	4.59734	215	1.5	MADKV07
317	N5	FALSE	Sample 81	N2	UNKNOWN	FAM	NFQ-MGB	Undetermined						TRUE	0.04	TRUE	1	40		37.2585	0.9991	-3.3448	99.0543							Sample 81
341	O5	FALSE	Sample 81	N2	UNKNOWN	FAM	NFQ-MGB	Undetermined						TRUE	0.04	TRUE	1	40		37.2585	0.9991	-3.3448	99.0543							Sample 81
294	M6	FALSE	Sample 82	N2	UNKNOWN	FAM	NFQ-MGB	33.5283	33.6531	0.288274	13.0385	12.1168	2.26568	TRUE	0.04	TRUE	1	40		37.2585	0.9991	-3.3448	99.0543							Sample 82	CeC	1.2	82	284.439	2.46098	215	1.5	MADKV07
318	N6	FALSE	Sample 82	N2	UNKNOWN	FAM	NFQ-MGB	33.9828	33.6531	0.288274	9.53558	12.1168	2.26568	TRUE	0.04	TRUE	1	40		37.2585	0.9991	-3.3448	99.0543							Sample 82
342	O6	FALSE	Sample 82	N2	UNKNOWN	FAM	NFQ-MGB	33.4483	33.6531	0.288274	13.7764	12.1168	2.26568	TRUE	0.04	TRUE	1	40		37.2585	0.9991	-3.3448	99.0543							Sample 82
295	M7	FALSE	Sample 83	N2	UNKNOWN	FAM	NFQ-MGB	36.6418	36.4439	0.226759	1.52891	1.76647	0.281487	TRUE	0.04	TRUE	1	40		37.2585	0.9991	-3.3448	99.0543							Sample 83	CeC	1.4	83	468.233	1.49498	215	1.5	MADKV07
319	N7	FALSE	Sample 83	N2	UNKNOWN	FAM	NFQ-MGB	36.4936	36.4439	0.226759	1.69314	1.76647	0.281487	TRUE	0.04	TRUE	1	40		37.2585	0.9991	-3.3448	99.0543							Sample 83
343	O7	FALSE	Sample 83	N2	UNKNOWN	FAM	NFQ-MGB	36.1965	36.4439	0.226759	2.07737	1.76647	0.281487	TRUE	0.04	TRUE	1	40		37.2585	0.9991	-3.3448	99.0543							Sample 83
296	M8	FALSE	Sample 84	N2	UNKNOWN	FAM	NFQ-MGB	Undetermined						TRUE	0.04	TRUE	1	40		37.2585	0.9991	-3.3448	99.0543							Sample 84	CeC	1.6	84	159.36	4.39257	215	1.5	MADKV07
320	N8	FALSE	Sample 84	N2	UNKNOWN	FAM	NFQ-MGB	Undetermined						TRUE	0.04	TRUE	1	40		37.2585	0.9991	-3.3448	99.0543							Sample 84
344	O8	FALSE	Sample 84	N2	UNKNOWN	FAM	NFQ-MGB	Undetermined						TRUE	0.04	TRUE	1	40		37.2585	0.9991	-3.3448	99.0543							Sample 84
297	M9	FALSE	Sample 85	N2	UNKNOWN	FAM	NFQ-MGB	32.4012	32.8381	0.489924	28.3269	21.747	6.9024	TRUE	0.04	TRUE	1	40		37.2585	0.9991	-3.3448	99.0543							Sample 85	CeC	2.2	85	210.733	3.32174	215	1.5	MADKV07
321	N9	FALSE	Sample 85	N2	UNKNOWN	FAM	NFQ-MGB	33.3678	32.8381	0.489924	14.5619	21.747	6.9024	TRUE	0.04	TRUE	1	40		37.2585	0.9991	-3.3448	99.0543							Sample 85
345	O9	FALSE	Sample 85	N2	UNKNOWN	FAM	NFQ-MGB	32.7453	32.8381	0.489924	22.3521	21.747	6.9024	TRUE	0.04	TRUE	1	40		37.2585	0.9991	-3.3448	99.0543							Sample 85
298	M10	FALSE	Sample 86	N2	UNKNOWN	FAM	NFQ-MGB	37.1272	36.5998	0.745858	1.09457	1.67857	0.825894	TRUE	0.04	TRUE	1	40		37.2585	0.9991	-3.3448	99.0543							Sample 86	CeC	2.4	86	187.456	3.73421	215	1.5	MADKV07
322	N10	FALSE	Sample 86	N2	UNKNOWN	FAM	NFQ-MGB	Undetermined	36.5998	0.745858				TRUE	0.04	TRUE	1	40		37.2585	0.9991	-3.3448	99.0543							Sample 86
346	O10	FALSE	Sample 86	N2	UNKNOWN	FAM	NFQ-MGB	36.0724	36.5998	0.745858	2.26257	1.67857	0.825894	TRUE	0.04	TRUE	1	40		37.2585	0.9991	-3.3448	99.0543							Sample 86
299	M11	FALSE	Sample 87	N2	UNKNOWN	FAM	NFQ-MGB	Undetermined	38.7212					TRUE	0.04	TRUE	1	40		37.2585	0.9991	-3.3448	99.0543							Sample 87	CeC	2.6	87	253.864	2.75738	215	1.5	MADKV07
323	N11	FALSE	Sample 87	N2	UNKNOWN	FAM	NFQ-MGB	38.7212	38.7212		0.365335	0.365335		TRUE	0.04	TRUE	1	40		37.2585	0.9991	-3.3448	99.0543							Sample 87
347	O11	FALSE	Sample 87	N2	UNKNOWN	FAM	NFQ-MGB	Undetermined	38.7212					TRUE	0.04	TRUE	1	40		37.2585	0.9991	-3.3448	99.0543							Sample 87
300	M12	FALSE	Sample 88	N2	UNKNOWN	FAM	NFQ-MGB	31.9806	31.9817	0.402235	37.8385	38.7836	10.632	TRUE	0.04	TRUE	1	40		37.2585	0.9991	-3.3448	99.0543							Sample 88	CeC	3.2	88	168.589	4.15211	215	1.5	MADKV07
324	N12	FALSE	Sample 88	N2	UNKNOWN	FAM	NFQ-MGB	31.58	31.9817	0.402235	49.8566	38.7836	10.632	TRUE	0.04	TRUE	1	40		37.2585	0.9991	-3.3448	99.0543							Sample 88
348	O12	FALSE	Sample 88	N2	UNKNOWN	FAM	NFQ-MGB	32.3844	31.9817	0.402235	28.6556	38.7836	10.632	TRUE	0.04	TRUE	1	40		37.2585	0.9991	-3.3448	99.0543							Sample 88
301	M13	FALSE	Sample 89	N2	UNKNOWN	FAM	NFQ-MGB	Undetermined						TRUE	0.04	TRUE	1	40		37.2585	0.9991	-3.3448	99.0543							Sample 89	CeC	3.4	89	206.051	3.39722	215	1.5	MADKV07
325	N13	FALSE	Sample 89	N2	UNKNOWN	FAM	NFQ-MGB	Undetermined						TRUE	0.04	TRUE	1	40		37.2585	0.9991	-3.3448	99.0543							Sample 89
349	O13	FALSE	Sample 89	N2	UNKNOWN	FAM	NFQ-MGB	Undetermined						TRUE	0.04	TRUE	1	40		37.2585	0.9991	-3.3448	99.0543							Sample 89
302	M14	FALSE	Sample 90	N2	UNKNOWN	FAM	NFQ-MGB	Undetermined						TRUE	0.04	TRUE	1	40		37.2585	0.9991	-3.3448	99.0543							Sample 90	CeC	3.6	90	114.889	6.09284	215	1.5	MADKV07
326	N14	FALSE	Sample 90	N2	UNKNOWN	FAM	NFQ-MGB	Undetermined						TRUE	0.04	TRUE	1	40		37.2585	0.9991	-3.3448	99.0543							Sample 90
350	O14	FALSE	Sample 90	N2	UNKNOWN	FAM	NFQ-MGB	Undetermined						TRUE	0.04	TRUE	1	40		37.2585	0.9991	-3.3448	99.0543							Sample 90
303	M15	FALSE	Sample 91	N2	UNKNOWN	FAM	NFQ-MGB	Undetermined						TRUE	0.04	TRUE	1	40		37.2585	0.9991	-3.3448	99.0543							Sample 91	Ileum	Mock	91	131.902	5.30697	215	1.5	MADKV07
327	N15	FALSE	Sample 91	N2	UNKNOWN	FAM	NFQ-MGB	Undetermined						TRUE	0.04	TRUE	1	40		37.2585	0.9991	-3.3448	99.0543							Sample 91
351	O15	FALSE	Sample 91	N2	UNKNOWN	FAM	NFQ-MGB	Undetermined						TRUE	0.04	TRUE	1	40		37.2585	0.9991	-3.3448	99.0543							Sample 91
304	M16	FALSE	Sample 92	N2	UNKNOWN	FAM	NFQ-MGB	36.3335	35.4813	0.957951	1.89039	3.94093	2.65454	TRUE	0.04	TRUE	1	40		37.2585	0.9991	-3.3448	99.0543							Sample 92	Ileum	1.2	92	67.256	10.408	215	1.5	MADKV07
328	N16	FALSE	Sample 92	N2	UNKNOWN	FAM	NFQ-MGB	34.4445	35.4813	0.957951	6.93927	3.94093	2.65454	TRUE	0.04	TRUE	1	40		37.2585	0.9991	-3.3448	99.0543							Sample 92
352	O16	FALSE	Sample 92	N2	UNKNOWN	FAM	NFQ-MGB	35.666	35.4813	0.957951	2.99312	3.94093	2.65454	TRUE	0.04	TRUE	1	40		37.2585	0.9991	-3.3448	99.0543							Sample 92
305	M17	FALSE	Sample 93	N2	UNKNOWN	FAM	NFQ-MGB	Undetermined	37.506	1.3678				TRUE	0.04	TRUE	1	40		37.2585	0.9991	-3.3448	99.0543							Sample 93	Ileum	1.4	93	124.607	5.61766	215	1.5	MADKV07
329	N17	FALSE	Sample 93	N2	UNKNOWN	FAM	NFQ-MGB	38.4732	37.506	1.3678	0.433344	1.03726	0.854063	TRUE	0.04	TRUE	1	40		37.2585	0.9991	-3.3448	99.0543							Sample 93
353	O17	FALSE	Sample 93	N2	UNKNOWN	FAM	NFQ-MGB	36.5389	37.506	1.3678	1.64117	1.03726	0.854063	TRUE	0.04	TRUE	1	40		37.2585	0.9991	-3.3448	99.0543							Sample 93
306	M18	FALSE	Sample 94	N2	UNKNOWN	FAM	NFQ-MGB	Undetermined						TRUE	0.04	TRUE	1	40		37.2585	0.9991	-3.3448	99.0543							Sample 94	Ileum	1.6	94	182.724	3.83091	215	1.5	MADKV07
330	N18	FALSE	Sample 94	N2	UNKNOWN	FAM	NFQ-MGB	Undetermined						TRUE	0.04	TRUE	1	40		37.2585	0.9991	-3.3448	99.0543							Sample 94
354	O18	FALSE	Sample 94	N2	UNKNOWN	FAM	NFQ-MGB	Undetermined						TRUE	0.04	TRUE	1	40		37.2585	0.9991	-3.3448	99.0543							Sample 94
307	M19	FALSE	Sample 95	N2	UNKNOWN	FAM	NFQ-MGB	35.7602	35.6229	0.218797	2.8051	3.10727	0.48619	TRUE	0.04	TRUE	1	40		37.2585	0.9991	-3.3448	99.0543							Sample 95	Ileum	2.2	95	125.196	5.59123	215	1.5	MADKV07
331	N19	FALSE	Sample 95	N2	UNKNOWN	FAM	NFQ-MGB	35.3706	35.6229	0.218797	3.66811	3.10727	0.48619	TRUE	0.04	TRUE	1	40		37.2585	0.9991	-3.3448	99.0543							Sample 95
355	O19	FALSE	Sample 95	N2	UNKNOWN	FAM	NFQ-MGB	35.7378	35.6229	0.218797	2.8486	3.10727	0.48619	TRUE	0.04	TRUE	1	40		37.2585	0.9991	-3.3448	99.0543							Sample 95
308	M20	FALSE	Sample 96	N2	UNKNOWN	FAM	NFQ-MGB	Undetermined						TRUE	0.04	TRUE	1	40		37.2585	0.9991	-3.3448	99.0543							Sample 96	Ileum	2.4	96	195.118	3.58757	215	1.5	MADKV07
332	N20	FALSE	Sample 96	N2	UNKNOWN	FAM	NFQ-MGB	Undetermined						TRUE	0.04	TRUE	1	40		37.2585	0.9991	-3.3448	99.0543							Sample 96
356	O20	FALSE	Sample 96	N2	UNKNOWN	FAM	NFQ-MGB	Undetermined						TRUE	0.04	TRUE	1	40		37.2585	0.9991	-3.3448	99.0543							Sample 96
309	M21	FALSE	Sample 97	N2	UNKNOWN	FAM	NFQ-MGB	Undetermined						TRUE	0.04	TRUE	1	40		37.2585	0.9991	-3.3448	99.0543							Sample 97	Ileum	2.6	97	150.534	4.65011	215	1.5	MADKV07
333	N21	FALSE	Sample 97	N2	UNKNOWN	FAM	NFQ-MGB	Undetermined						TRUE	0.04	TRUE	1	40		37.2585	0.9991	-3.3448	99.0543							Sample 97
357	O21	FALSE	Sample 97	N2	UNKNOWN	FAM	NFQ-MGB	Undetermined						TRUE	0.04	TRUE	1	40		37.2585	0.9991	-3.3448	99.0543							Sample 97
310	M22	FALSE	Sample 98	N2	UNKNOWN	FAM	NFQ-MGB	Undetermined						TRUE	0.04	TRUE	1	40		37.2585	0.9991	-3.3448	99.0543							Sample 98	Ileum	3.2	98	126.488	5.53412	215	1.5	MADKV07
334	N22	FALSE	Sample 98	N2	UNKNOWN	FAM	NFQ-MGB	Undetermined						TRUE	0.04	TRUE	1	40		37.2585	0.9991	-3.3448	99.0543							Sample 98
358	O22	FALSE	Sample 98	N2	UNKNOWN	FAM	NFQ-MGB	Undetermined						TRUE	0.04	TRUE	1	40		37.2585	0.9991	-3.3448	99.0543							Sample 98
311	M23	FALSE	Sample 99	N2	UNKNOWN	FAM	NFQ-MGB	Undetermined						TRUE	0.04	TRUE	1	40		37.2585	0.9991	-3.3448	99.0543							Sample 99	Ileum	3.4	99	66.902	10.4631	215	1.5	MADKV07
335	N23	FALSE	Sample 99	N2	UNKNOWN	FAM	NFQ-MGB	Undetermined						TRUE	0.04	TRUE	1	40		37.2585	0.9991	-3.3448	99.0543							Sample 99
359	O23	FALSE	Sample 99	N2	UNKNOWN	FAM	NFQ-MGB	Undetermined						TRUE	0.04	TRUE	1	40		37.2585	0.9991	-3.3448	99.0543							Sample 99
312	M24	FALSE	Sample 100	N2	UNKNOWN	FAM	NFQ-MGB	Undetermined						TRUE	0.04	TRUE	1	40		37.2585	0.9991	-3.3448	99.0543							Sample 100	Ileum	3.6	100	163.839	4.27249	215	1.5	MADKV07
336	N24	FALSE	Sample 100	N2	UNKNOWN	FAM	NFQ-MGB	Undetermined						TRUE	0.04	TRUE	1	40		37.2585	0.9991	-3.3448	99.0543							Sample 100
360	O24	FALSE	Sample 100	N2	UNKNOWN	FAM	NFQ-MGB	Undetermined						TRUE	0.04	TRUE	1	40		37.2585	0.9991	-3.3448	99.0543							Sample 100
193	I1	FALSE	Sample 101	N2	UNKNOWN	FAM	NFQ-MGB	Undetermined						TRUE	0.04	TRUE	1	40		37.2585	0.9991	-3.3448	99.0543							Sample 101	Large Int	Mock	101	143.321	4.88414	215	1.5	MADKV07
194	I2	FALSE	Sample 101	N2	UNKNOWN	FAM	NFQ-MGB	Undetermined						TRUE	0.04	TRUE	1	40		37.2585	0.9991	-3.3448	99.0543							Sample 101
195	I3	FALSE	Sample 101	N2	UNKNOWN	FAM	NFQ-MGB	Undetermined						TRUE	0.04	TRUE	1	40		37.2585	0.9991	-3.3448	99.0543							Sample 101
217	J1	FALSE	Sample 102	N2	UNKNOWN	FAM	NFQ-MGB	35.1864	35.2499	0.354269	4.16387	4.06352	0.952606	TRUE	0.04	TRUE	1	40		37.2585	0.9991	-3.3448	99.0543							Sample 102	Large Int	1.2	102	98.211	7.12751	215	1.5	MADKV07
218	J2	FALSE	Sample 102	N2	UNKNOWN	FAM	NFQ-MGB	34.9317	35.2499	0.354269	4.96197	4.06352	0.952606	TRUE	0.04	TRUE	1	40		37.2585	0.9991	-3.3448	99.0543							Sample 102
219	J3	FALSE	Sample 102	N2	UNKNOWN	FAM	NFQ-MGB	35.6316	35.2499	0.354269	3.06471	4.06352	0.952606	TRUE	0.04	TRUE	1	40		37.2585	0.9991	-3.3448	99.0543							Sample 102
241	K1	FALSE	Sample 103	N2	UNKNOWN	FAM	NFQ-MGB	36.5471	36.5471		1.63186	1.63186		TRUE	0.04	TRUE	1	40		37.2585	0.9991	-3.3448	99.0543							Sample 103	Large Int	1.4	103	119.723	5.84683	215	1.5	MADKV07
242	K2	FALSE	Sample 103	N2	UNKNOWN	FAM	NFQ-MGB	Undetermined	36.5471					TRUE	0.04	TRUE	1	40		37.2585	0.9991	-3.3448	99.0543							Sample 103
243	K3	FALSE	Sample 103	N2	UNKNOWN	FAM	NFQ-MGB	Undetermined	36.5471					TRUE	0.04	TRUE	1	40		37.2585	0.9991	-3.3448	99.0543							Sample 103
265	L1	FALSE	Sample 104	N2	UNKNOWN	FAM	NFQ-MGB	Undetermined						TRUE	0.04	TRUE	1	40		37.2585	0.9991	-3.3448	99.0543							Sample 104	Large Int	1.6	104	200.392	3.49315	215	1.5	MADKV07
266	L2	FALSE	Sample 104	N2	UNKNOWN	FAM	NFQ-MGB	Undetermined						TRUE	0.04	TRUE	1	40		37.2585	0.9991	-3.3448	99.0543							Sample 104
267	L3	FALSE	Sample 104	N2	UNKNOWN	FAM	NFQ-MGB	Undetermined						TRUE	0.04	TRUE	1	40		37.2585	0.9991	-3.3448	99.0543							Sample 104
289	M1	FALSE	Sample 105	N2	UNKNOWN	FAM	NFQ-MGB	32.6039	32.8628	0.22636	24.6366	20.7867	3.3586	TRUE	0.04	TRUE	1	40		37.2585	0.9991	-3.3448	99.0543							Sample 105	Large Int	2.2	105	219.386	3.19072	215	1.5	MADKV07
290	M2	FALSE	Sample 105	N2	UNKNOWN	FAM	NFQ-MGB	32.9611	32.8628	0.22636	19.2665	20.7867	3.3586	TRUE	0.04	TRUE	1	40		37.2585	0.9991	-3.3448	99.0543							Sample 105
291	M3	FALSE	Sample 105	N2	UNKNOWN	FAM	NFQ-MGB	33.0235	32.8628	0.22636	18.4569	20.7867	3.3586	TRUE	0.04	TRUE	1	40		37.2585	0.9991	-3.3448	99.0543							Sample 105
313	N1	FALSE	Sample 106	N2	UNKNOWN	FAM	NFQ-MGB	37.3969	37.8835	0.688155	0.909146	0.687192	0.31389	TRUE	0.04	TRUE	1	40		37.2585	0.9991	-3.3448	99.0543							Sample 106	Large Int	2.4	106	188.939	3.7049	215	1.5	MADKV07
314	N2	FALSE	Sample 106	N2	UNKNOWN	FAM	NFQ-MGB	Undetermined	37.8835	0.688155				TRUE	0.04	TRUE	1	40		37.2585	0.9991	-3.3448	99.0543							Sample 106
315	N3	FALSE	Sample 106	N2	UNKNOWN	FAM	NFQ-MGB	38.3701	37.8835	0.688155	0.465238	0.687192	0.31389	TRUE	0.04	TRUE	1	40		37.2585	0.9991	-3.3448	99.0543							Sample 106
337	O1	FALSE	Sample 107	N2	UNKNOWN	FAM	NFQ-MGB	Undetermined						TRUE	0.04	TRUE	1	40		37.2585	0.9991	-3.3448	99.0543							Sample 107	Large Int	2.6	107	280.251	2.49776	215	1.5	MADKV07
338	O2	FALSE	Sample 107	N2	UNKNOWN	FAM	NFQ-MGB	Undetermined						TRUE	0.04	TRUE	1	40		37.2585	0.9991	-3.3448	99.0543							Sample 107
339	O3	FALSE	Sample 107	N2	UNKNOWN	FAM	NFQ-MGB	Undetermined						TRUE	0.04	TRUE	1	40		37.2585	0.9991	-3.3448	99.0543							Sample 107
361	P1	FALSE	Sample 108	N2	UNKNOWN	FAM	NFQ-MGB	35.0236	34.6991	0.307759	4.65785	5.90984	1.22202	TRUE	0.04	TRUE	1	40		37.2585	0.9991	-3.3448	99.0543							Sample 108	Large Int	3.2	108	267.291	2.61887	215	1.5	MADKV07
362	P2	FALSE	Sample 108	N2	UNKNOWN	FAM	NFQ-MGB	34.6625	34.6991	0.307759	5.97216	5.90984	1.22202	TRUE	0.04	TRUE	1	40		37.2585	0.9991	-3.3448	99.0543							Sample 108
363	P3	FALSE	Sample 108	N2	UNKNOWN	FAM	NFQ-MGB	34.4113	34.6991	0.307759	7.09951	5.90984	1.22202	TRUE	0.04	TRUE	1	40		37.2585	0.9991	-3.3448	99.0543							Sample 108
196	I4	FALSE	Sample 109	N2	UNKNOWN	FAM	NFQ-MGB	Undetermined						TRUE	0.04	TRUE	1	40		37.2585	0.9991	-3.3448	99.0543							Sample 109	Large Int	3.4	109	323.562	2.16342	215	1.5	MADKV07
220	J4	FALSE	Sample 109	N2	UNKNOWN	FAM	NFQ-MGB	Undetermined						TRUE	0.04	TRUE	1	40		37.2585	0.9991	-3.3448	99.0543							Sample 109
244	K4	FALSE	Sample 109	N2	UNKNOWN	FAM	NFQ-MGB	Undetermined						TRUE	0.04	TRUE	1	40		37.2585	0.9991	-3.3448	99.0543							Sample 109
268	L4	FALSE	Sample 110	N2	UNKNOWN	FAM	NFQ-MGB	Undetermined						TRUE	0.04	TRUE	1	40		37.2585	0.9991	-3.3448	99.0543							Sample 110	Large Int	3.6	110	343.945	2.03521	215	1.5	MADKV07
292	M4	FALSE	Sample 110	N2	UNKNOWN	FAM	NFQ-MGB	Undetermined						TRUE	0.04	TRUE	1	40		37.2585	0.9991	-3.3448	99.0543							Sample 110
316	N4	FALSE	Sample 110	N2	UNKNOWN	FAM	NFQ-MGB	Undetermined						TRUE	0.04	TRUE	1	40		37.2585	0.9991	-3.3448	99.0543							Sample 110

## Sheet: CT for 10 wk R2G
File Name	X:\Users\knollm\MICHAEL DAVIS\MADKV20\MADKV202123 titer\MADKV20M N2 TITER_Copy.eds
Comment
Operator	DEFAULT
Barcode
Instrument Type	QuantStudio™ 5 System
Block Type	384-Well Block
Instrument Name	Gale-Lab-QuantStudio
Instrument Serial Number	272532607
Heated Cover Serial Number
Block Serial Number	20525021
Run Start Date/Time	2022-02-11 10:24:30 AM PST
Run End Date/Time	2022-02-11 11:59:59 AM PST
Run Duration	95 minutes 29 seconds
Sample Volume	10.0
Cover Temperature	105.0
Passive Reference	NONE
PCR Stage/Step Number	Stage 2 Step 2
Quantification Cycle Method	CT
Analysis Date/Time	2022-02-11 03:14:53 PM PST
Software Name and Version	Design & Analysis Software v2.5.1
Plugin Name and Version	Primary Analysis v1.6.0, Standard Curve v1.5.1
Exported On	2022-02-11 04:27:26 PM PST
Well	Well Position	Sample	Quantity	Target	Dye	Task	Reporter	Quencher	Amp Status	Cq	Cq Mean	Cq Confidence	Cq SD	Quantity Mean	Quantity SD	Auto Threshold	Threshold	Auto Baseline	Baseline Start	Baseline End	Tm1	Tm2	Tm3	Tm4	Y-Intercept	R2	Slope	Efficiency	Standard Deviation	Standard Error	Omit		Sample	Tissue	Gender	Label	uL RNA for 200ng	uL cDNA	uL Sample input uL	Trizol/Chloroform total Volume	uL cDNA/well	uL RNA Eluted	Tissue weight mg	MADKV20
265	L1	0.9375	0.9375	N2	FAM	STANDARD	FAM	NFQ-MGB	No Amp	Undetermined	39.6973	0				FALSE	32228.9	TRUE	3	39					40.8103	0.996388	-3.6501	87.9152	0.602464	0.0408119	FALSE
266	L2	0.9375	0.9375	N2	FAM	STANDARD	FAM	NFQ-MGB	Inconclusive	39.6973	39.6973	0				FALSE	32228.9	TRUE	3	29					40.8103	0.996388	-3.6501	87.9152	0.602464	0.0408119	FALSE
267	L3	0.9375	0.9375	N2	FAM	STANDARD	FAM	NFQ-MGB	No Amp	Undetermined	39.6973	0				FALSE	32228.9	TRUE	3	39					40.8103	0.996388	-3.6501	87.9152	0.602464	0.0408119	FALSE
241	K1	1.875	1.875	N2	FAM	STANDARD	FAM	NFQ-MGB	No Amp	Undetermined	38.2248	0				FALSE	32228.9	TRUE	3	39					40.8103	0.996388	-3.6501	87.9152	0.602464	0.0408119	FALSE
242	K2	1.875	1.875	N2	FAM	STANDARD	FAM	NFQ-MGB	Inconclusive	38.2248	38.2248	0.836741				FALSE	32228.9	TRUE	3	30					40.8103	0.996388	-3.6501	87.9152	0.602464	0.0408119	FALSE
243	K3	1.875	1.875	N2	FAM	STANDARD	FAM	NFQ-MGB	No Amp	Undetermined	38.2248	0				FALSE	32228.9	TRUE	3	39					40.8103	0.996388	-3.6501	87.9152	0.602464	0.0408119	FALSE
217	J1	3.75	3.75	N2	FAM	STANDARD	FAM	NFQ-MGB	No Amp	Undetermined	38.5111	0	0.350028			FALSE	32228.9	TRUE	3	33					40.8103	0.996388	-3.6501	87.9152	0.602464	0.0408119	FALSE
218	J2	3.75	3.75	N2	FAM	STANDARD	FAM	NFQ-MGB	Inconclusive	38.7586	38.5111	0.296595	0.350028			FALSE	32228.9	TRUE	3	32					40.8103	0.996388	-3.6501	87.9152	0.602464	0.0408119	FALSE
219	J3	3.75	3.75	N2	FAM	STANDARD	FAM	NFQ-MGB	Inconclusive	38.2636	38.5111	0.785632	0.350028			FALSE	32228.9	TRUE	3	31					40.8103	0.996388	-3.6501	87.9152	0.602464	0.0408119	FALSE
193	I1	7.5	7.5	N2	FAM	STANDARD	FAM	NFQ-MGB	Inconclusive	38.1759	37.8019	0.882559	0.828891			FALSE	32228.9	TRUE	3	29					40.8103	0.996388	-3.6501	87.9152	0.602464	0.0408119	FALSE
194	I2	7.5	7.5	N2	FAM	STANDARD	FAM	NFQ-MGB	Amp	36.852	37.8019	0.945444	0.828891			FALSE	32228.9	TRUE	3	28					40.8103	0.996388	-3.6501	87.9152	0.602464	0.0408119	FALSE
195	I3	7.5	7.5	N2	FAM	STANDARD	FAM	NFQ-MGB	Inconclusive	38.378	37.8019	0.715021	0.828891			FALSE	32228.9	TRUE	3	27					40.8103	0.996388	-3.6501	87.9152	0.602464	0.0408119	FALSE
169	H1	15.0	15	N2	FAM	STANDARD	FAM	NFQ-MGB	Amp	37.3092	36.9945	0.929966	1.20506			FALSE	32228.9	TRUE	3	29					40.8103	0.996388	-3.6501	87.9152	0.602464	0.0408119	FALSE
170	H2	15.0	15	N2	FAM	STANDARD	FAM	NFQ-MGB	Amp	35.6634	36.9945	0.959991	1.20506			FALSE	32228.9	TRUE	3	27					40.8103	0.996388	-3.6501	87.9152	0.602464	0.0408119	FALSE
171	H3	15.0	15	N2	FAM	STANDARD	FAM	NFQ-MGB	Inconclusive	38.011	36.9945	0.890979	1.20506			FALSE	32228.9	TRUE	3	29					40.8103	0.996388	-3.6501	87.9152	0.602464	0.0408119	FALSE
145	G1	150.0	150	N2	FAM	STANDARD	FAM	NFQ-MGB	Amp	33.4561	33.2667	0.973942	0.248133			FALSE	32228.9	TRUE	3	27					40.8103	0.996388	-3.6501	87.9152	0.602464	0.0408119	FALSE
146	G2	150.0	150	N2	FAM	STANDARD	FAM	NFQ-MGB	Amp	32.9858	33.2667	0.983481	0.248133			FALSE	32228.9	TRUE	3	22					40.8103	0.996388	-3.6501	87.9152	0.602464	0.0408119	FALSE
147	G3	150.0	150	N2	FAM	STANDARD	FAM	NFQ-MGB	Amp	33.3582	33.2667	0.957399	0.248133			FALSE	32228.9	TRUE	3	25					40.8103	0.996388	-3.6501	87.9152	0.602464	0.0408119	FALSE
121	F1	1500.0	1500	N2	FAM	STANDARD	FAM	NFQ-MGB	Amp	29.4441	29.3942	0.975924	0.121456			FALSE	32228.9	TRUE	3	23					40.8103	0.996388	-3.6501	87.9152	0.602464	0.0408119	FALSE
122	F2	1500.0	1500	N2	FAM	STANDARD	FAM	NFQ-MGB	Amp	29.2557	29.3942	0.977808	0.121456			FALSE	32228.9	TRUE	3	20					40.8103	0.996388	-3.6501	87.9152	0.602464	0.0408119	FALSE
123	F3	1500.0	1500	N2	FAM	STANDARD	FAM	NFQ-MGB	Amp	29.4827	29.3942	0.981619	0.121456			FALSE	32228.9	TRUE	3	19					40.8103	0.996388	-3.6501	87.9152	0.602464	0.0408119	FALSE
97	E1	15000.0	15000	N2	FAM	STANDARD	FAM	NFQ-MGB	Amp	25.759	25.7275	0.983037	0.0707576			FALSE	32228.9	TRUE	3	15					40.8103	0.996388	-3.6501	87.9152	0.602464	0.0408119	FALSE
98	E2	15000.0	15000	N2	FAM	STANDARD	FAM	NFQ-MGB	Amp	25.6465	25.7275	0.984319	0.0707576			FALSE	32228.9	TRUE	3	18					40.8103	0.996388	-3.6501	87.9152	0.602464	0.0408119	FALSE
99	E3	15000.0	15000	N2	FAM	STANDARD	FAM	NFQ-MGB	Amp	25.7771	25.7275	0.981166	0.0707576			FALSE	32228.9	TRUE	3	18					40.8103	0.996388	-3.6501	87.9152	0.602464	0.0408119	FALSE
73	D1	150000.0	150000	N2	FAM	STANDARD	FAM	NFQ-MGB	Amp	22.0014	22.0256	0.983121	0.060485			FALSE	32228.9	TRUE	3	14					40.8103	0.996388	-3.6501	87.9152	0.602464	0.0408119	FALSE
74	D2	150000.0	150000	N2	FAM	STANDARD	FAM	NFQ-MGB	Amp	21.9811	22.0256	0.980452	0.060485			FALSE	32228.9	TRUE	3	12					40.8103	0.996388	-3.6501	87.9152	0.602464	0.0408119	FALSE
75	D3	150000.0	150000	N2	FAM	STANDARD	FAM	NFQ-MGB	Amp	22.0945	22.0256	0.977634	0.060485			FALSE	32228.9	TRUE	3	14					40.8103	0.996388	-3.6501	87.9152	0.602464	0.0408119	FALSE
49	C1	1500000.0	1500000	N2	FAM	STANDARD	FAM	NFQ-MGB	Amp	18.2827	18.1884	0.968178	0.0884088			FALSE	32228.9	TRUE	3	10					40.8103	0.996388	-3.6501	87.9152	0.602464	0.0408119	FALSE
50	C2	1500000.0	1500000	N2	FAM	STANDARD	FAM	NFQ-MGB	Amp	18.1752	18.1884	0.976583	0.0884088			FALSE	32228.9	TRUE	3	9					40.8103	0.996388	-3.6501	87.9152	0.602464	0.0408119	FALSE
51	C3	1500000.0	1500000	N2	FAM	STANDARD	FAM	NFQ-MGB	Amp	18.1073	18.1884	0.96827	0.0884088			FALSE	32228.9	TRUE	3	8					40.8103	0.996388	-3.6501	87.9152	0.602464	0.0408119	FALSE
25	B1	1.5E7	15000000	N2	FAM	STANDARD	FAM	NFQ-MGB	Amp	14.5754	14.3679	0.896771	0.194226			FALSE	32228.9	TRUE	3	8					40.8103	0.996388	-3.6501	87.9152	0.602464	0.0408119	FALSE
26	B2	1.5E7	15000000	N2	FAM	STANDARD	FAM	NFQ-MGB	Amp	14.1905	14.3679	0.872828	0.194226			FALSE	32228.9	TRUE	3	7					40.8103	0.996388	-3.6501	87.9152	0.602464	0.0408119	FALSE
27	B3	1.5E7	15000000	N2	FAM	STANDARD	FAM	NFQ-MGB	Amp	14.3378	14.3679	0.875299	0.194226			FALSE	32228.9	TRUE	3	7					40.8103	0.996388	-3.6501	87.9152	0.602464	0.0408119	FALSE
1	A1	1.5E8	150000000	N2	FAM	STANDARD	FAM	NFQ-MGB	Amp	10.7359	10.8549	0.827417	0.181018			FALSE	32228.9	TRUE	3	5					40.8103	0.996388	-3.6501	87.9152	0.602464	0.0408119	FALSE
2	A2	1.5E8	150000000	N2	FAM	STANDARD	FAM	NFQ-MGB	Amp	10.7657	10.8549	0.81547	0.181018			FALSE	32228.9	TRUE	3	5					40.8103	0.996388	-3.6501	87.9152	0.602464	0.0408119	FALSE
3	A3	1.5E8	150000000	N2	FAM	STANDARD	FAM	NFQ-MGB	Amp	11.0633	10.8549	0.856978	0.181018			FALSE	32228.9	TRUE	3	6					40.8103	0.996388	-3.6501	87.9152	0.602464	0.0408119	FALSE
7	A7	Sample 1		N2	FAM	UNKNOWN	FAM	NFQ-MGB	No Amp	Undetermined		0				FALSE	32228.9	TRUE	3	39					40.8103	0.996388	-3.6501	87.9152	0.602464	0.0408119	FALSE		Sample 01	Lung	Male	1.M	6.41231	100	150	1200	3	100	26	MADKV20	Lung was originally Ran 1/05/22 Results below
8	A8	Sample 1		N2	FAM	UNKNOWN	FAM	NFQ-MGB	No Amp	Undetermined		0				FALSE	32228.9	TRUE	3	39					40.8103	0.996388	-3.6501	87.9152	0.602464	0.0408119	FALSE
9	A9	Sample 1		N2	FAM	UNKNOWN	FAM	NFQ-MGB	No Amp	Undetermined		0				FALSE	32228.9	TRUE	3	39					40.8103	0.996388	-3.6501	87.9152	0.602464	0.0408119	FALSE
31	B7	Sample 2	11.479	N2	FAM	UNKNOWN	FAM	NFQ-MGB	Amp	36.9415	37.4762	0.950317	0.756052			FALSE	32228.9	TRUE	3	31					40.8103	0.996388	-3.6501	87.9152	0.602464	0.0408119	FALSE		Sample 02	Hrt	Male	1.M	10.4921	100	150	1200	3	100	33	MADKV20
32	B8	Sample 2	5.84755	N2	FAM	UNKNOWN	FAM	NFQ-MGB	Inconclusive	38.0108	37.4762	0.9335	0.756052			FALSE	32228.9	TRUE	3	29					40.8103	0.996388	-3.6501	87.9152	0.602464	0.0408119	FALSE
33	B9	Sample 2		N2	FAM	UNKNOWN	FAM	NFQ-MGB	No Amp	Undetermined	37.4762	0	0.756052			FALSE	32228.9	TRUE	3	39					40.8103	0.996388	-3.6501	87.9152	0.602464	0.0408119	FALSE
55	C7	Sample 3		N2	FAM	UNKNOWN	FAM	NFQ-MGB	No Amp	Undetermined		0				FALSE	32228.9	TRUE	3	39					40.8103	0.996388	-3.6501	87.9152	0.602464	0.0408119	FALSE		Sample 03	Lvr	Male	1.M	0.938826	100	150	1200	3	100	53	MADKV20
56	C8	Sample 3		N2	FAM	UNKNOWN	FAM	NFQ-MGB	No Amp	Undetermined		0				FALSE	32228.9	TRUE	3	39					40.8103	0.996388	-3.6501	87.9152	0.602464	0.0408119	FALSE
57	C9	Sample 3		N2	FAM	UNKNOWN	FAM	NFQ-MGB	No Amp	Undetermined		0				FALSE	32228.9	TRUE	3	39					40.8103	0.996388	-3.6501	87.9152	0.602464	0.0408119	FALSE
79	D7	Sample 4		N2	FAM	UNKNOWN	FAM	NFQ-MGB	No Amp	Undetermined		0				FALSE	32228.9	TRUE	3	39					40.8103	0.996388	-3.6501	87.9152	0.602464	0.0408119	FALSE		Sample 04	Spln	Male	1.M	7.57576	100	150	1200	3	100	20	MADKV20
80	D8	Sample 4		N2	FAM	UNKNOWN	FAM	NFQ-MGB	No Amp	Undetermined		0				FALSE	32228.9	TRUE	3	39					40.8103	0.996388	-3.6501	87.9152	0.602464	0.0408119	FALSE
81	D9	Sample 4		N2	FAM	UNKNOWN	FAM	NFQ-MGB	No Amp	Undetermined		0				FALSE	32228.9	TRUE	3	39					40.8103	0.996388	-3.6501	87.9152	0.602464	0.0408119	FALSE
103	E7	Sample 5		N2	FAM	UNKNOWN	FAM	NFQ-MGB	No Amp	Undetermined		0				FALSE	32228.9	TRUE	3	39					40.8103	0.996388	-3.6501	87.9152	0.602464	0.0408119	FALSE		Sample 05	Stom	Male	1.M	13	100	150	1200	3	100	40	MADKV20
104	E8	Sample 5		N2	FAM	UNKNOWN	FAM	NFQ-MGB	No Amp	Undetermined		0				FALSE	32228.9	TRUE	3	39					40.8103	0.996388	-3.6501	87.9152	0.602464	0.0408119	FALSE
105	E9	Sample 5		N2	FAM	UNKNOWN	FAM	NFQ-MGB	No Amp	Undetermined		0				FALSE	32228.9	TRUE	3	39					40.8103	0.996388	-3.6501	87.9152	0.602464	0.0408119	FALSE
127	F7	Sample 6		N2	FAM	UNKNOWN	FAM	NFQ-MGB	No Amp	Undetermined		0				FALSE	32228.9	TRUE	3	39					40.8103	0.996388	-3.6501	87.9152	0.602464	0.0408119	FALSE		Sample 06	Kid	Male	1.M	1.21266	100	150	1200	3	100	90	MADKV20
128	F8	Sample 6		N2	FAM	UNKNOWN	FAM	NFQ-MGB	No Amp	Undetermined		0				FALSE	32228.9	TRUE	3	39					40.8103	0.996388	-3.6501	87.9152	0.602464	0.0408119	FALSE
129	F9	Sample 6		N2	FAM	UNKNOWN	FAM	NFQ-MGB	No Amp	Undetermined		0				FALSE	32228.9	TRUE	3	39					40.8103	0.996388	-3.6501	87.9152	0.602464	0.0408119	FALSE
151	G7	Sample 7		N2	FAM	UNKNOWN	FAM	NFQ-MGB	No Amp	Undetermined		0				FALSE	32228.9	TRUE	3	39					40.8103	0.996388	-3.6501	87.9152	0.602464	0.0408119	FALSE		Sample 07	Duo	Male	1.M	0.662324	100	150	1200	3	100	39	MADKV20
152	G8	Sample 7		N2	FAM	UNKNOWN	FAM	NFQ-MGB	No Amp	Undetermined		0				FALSE	32228.9	TRUE	3	39					40.8103	0.996388	-3.6501	87.9152	0.602464	0.0408119	FALSE
153	G9	Sample 7		N2	FAM	UNKNOWN	FAM	NFQ-MGB	No Amp	Undetermined		0				FALSE	32228.9	TRUE	3	39					40.8103	0.996388	-3.6501	87.9152	0.602464	0.0408119	FALSE
199	I7	Sample 9		N2	FAM	UNKNOWN	FAM	NFQ-MGB	No Amp	Undetermined		0				FALSE	32228.9	TRUE	3	39					40.8103	0.996388	-3.6501	87.9152	0.602464	0.0408119	FALSE		Sample 09	Lung	Male	2.M	4.50846	100	150	1200	3	100	29	MADKV20
200	I8	Sample 9		N2	FAM	UNKNOWN	FAM	NFQ-MGB	No Amp	Undetermined		0				FALSE	32228.9	TRUE	3	33					40.8103	0.996388	-3.6501	87.9152	0.602464	0.0408119	FALSE
201	I9	Sample 9		N2	FAM	UNKNOWN	FAM	NFQ-MGB	No Amp	Undetermined		0				FALSE	32228.9	TRUE	3	39					40.8103	0.996388	-3.6501	87.9152	0.602464	0.0408119	FALSE
223	J7	Sample 10		N2	FAM	UNKNOWN	FAM	NFQ-MGB	No Amp	Undetermined		0				FALSE	32228.9	TRUE	3	39					40.8103	0.996388	-3.6501	87.9152	0.602464	0.0408119	FALSE		Sample 10	Hrt	Male	2.M	6.20906	100	150	1200	3	100	23	MADKV20
224	J8	Sample 10		N2	FAM	UNKNOWN	FAM	NFQ-MGB	No Amp	Undetermined		0				FALSE	32228.9	TRUE	3	39					40.8103	0.996388	-3.6501	87.9152	0.602464	0.0408119	FALSE
225	J9	Sample 10		N2	FAM	UNKNOWN	FAM	NFQ-MGB	No Amp	Undetermined		0				FALSE	32228.9	TRUE	3	39					40.8103	0.996388	-3.6501	87.9152	0.602464	0.0408119	FALSE
247	K7	Sample 11		N2	FAM	UNKNOWN	FAM	NFQ-MGB	No Amp	Undetermined		0				FALSE	32228.9	TRUE	3	39					40.8103	0.996388	-3.6501	87.9152	0.602464	0.0408119	FALSE		Sample 11	Lvr	Male	2.M	0.5	100	150	1200	3	100	58	MADKV20
248	K8	Sample 11		N2	FAM	UNKNOWN	FAM	NFQ-MGB	No Amp	Undetermined		0				FALSE	32228.9	TRUE	3	39					40.8103	0.996388	-3.6501	87.9152	0.602464	0.0408119	FALSE
249	K9	Sample 11		N2	FAM	UNKNOWN	FAM	NFQ-MGB	No Amp	Undetermined		0				FALSE	32228.9	TRUE	3	39					40.8103	0.996388	-3.6501	87.9152	0.602464	0.0408119	FALSE
271	L7	Sample 12		N2	FAM	UNKNOWN	FAM	NFQ-MGB	No Amp	Undetermined		0				FALSE	32228.9	TRUE	3	39					40.8103	0.996388	-3.6501	87.9152	0.602464	0.0408119	FALSE		Sample 12	Spln	Male	2.M	3.73853	100	150	1200	3	100	24	MADKV20
272	L8	Sample 12		N2	FAM	UNKNOWN	FAM	NFQ-MGB	No Amp	Undetermined		0				FALSE	32228.9	TRUE	3	39					40.8103	0.996388	-3.6501	87.9152	0.602464	0.0408119	FALSE
273	L9	Sample 12		N2	FAM	UNKNOWN	FAM	NFQ-MGB	No Amp	Undetermined		0				FALSE	32228.9	TRUE	3	39					40.8103	0.996388	-3.6501	87.9152	0.602464	0.0408119	FALSE
295	M7	Sample 13		N2	FAM	UNKNOWN	FAM	NFQ-MGB	No Amp	Undetermined		0				FALSE	32228.9	TRUE	3	39					40.8103	0.996388	-3.6501	87.9152	0.602464	0.0408119	FALSE		Sample 13	Stom	Male	2.M	0.651285	100	150	1200	3	100	47	MADKV20
296	M8	Sample 13		N2	FAM	UNKNOWN	FAM	NFQ-MGB	No Amp	Undetermined		0				FALSE	32228.9	TRUE	3	39					40.8103	0.996388	-3.6501	87.9152	0.602464	0.0408119	FALSE
297	M9	Sample 13		N2	FAM	UNKNOWN	FAM	NFQ-MGB	No Amp	Undetermined		0				FALSE	32228.9	TRUE	3	39					40.8103	0.996388	-3.6501	87.9152	0.602464	0.0408119	FALSE
319	N7	Sample 14		N2	FAM	UNKNOWN	FAM	NFQ-MGB	No Amp	Undetermined		0				FALSE	32228.9	TRUE	3	39					40.8103	0.996388	-3.6501	87.9152	0.602464	0.0408119	FALSE		Sample 14	Kid	Male	2.M	1.23529	100	150	1200	3	100	102	MADKV20
320	N8	Sample 14		N2	FAM	UNKNOWN	FAM	NFQ-MGB	No Amp	Undetermined		0				FALSE	32228.9	TRUE	3	39					40.8103	0.996388	-3.6501	87.9152	0.602464	0.0408119	FALSE
321	N9	Sample 14		N2	FAM	UNKNOWN	FAM	NFQ-MGB	No Amp	Undetermined		0				FALSE	32228.9	TRUE	3	39					40.8103	0.996388	-3.6501	87.9152	0.602464	0.0408119	FALSE
343	O7	Sample 15		N2	FAM	UNKNOWN	FAM	NFQ-MGB	No Amp	Undetermined		0				FALSE	32228.9	TRUE	3	39					40.8103	0.996388	-3.6501	87.9152	0.602464	0.0408119	FALSE		Sample 15	Duo	Male	2.M	7.18597	100	150	1200	3	100	21	MADKV20
344	O8	Sample 15		N2	FAM	UNKNOWN	FAM	NFQ-MGB	No Amp	Undetermined		0				FALSE	32228.9	TRUE	3	39					40.8103	0.996388	-3.6501	87.9152	0.602464	0.0408119	FALSE
345	O9	Sample 15		N2	FAM	UNKNOWN	FAM	NFQ-MGB	No Amp	Undetermined		0				FALSE	32228.9	TRUE	3	39					40.8103	0.996388	-3.6501	87.9152	0.602464	0.0408119	FALSE
10	A10	Sample 17		N2	FAM	UNKNOWN	FAM	NFQ-MGB	No Amp	Undetermined		0				FALSE	32228.9	TRUE	3	32					40.8103	0.996388	-3.6501	87.9152	0.602464	0.0408119	FALSE		Sample 17	Lung	Male	3.M	2.01822	100	150	1200	3	100	50	MADKV20
11	A11	Sample 17		N2	FAM	UNKNOWN	FAM	NFQ-MGB	No Amp	Undetermined		0				FALSE	32228.9	TRUE	3	27					40.8103	0.996388	-3.6501	87.9152	0.602464	0.0408119	FALSE
12	A12	Sample 17		N2	FAM	UNKNOWN	FAM	NFQ-MGB	No Amp	Undetermined		0				FALSE	32228.9	TRUE	3	39					40.8103	0.996388	-3.6501	87.9152	0.602464	0.0408119	FALSE
34	B10	Sample 18		N2	FAM	UNKNOWN	FAM	NFQ-MGB	No Amp	Undetermined		0				FALSE	32228.9	TRUE	3	39					40.8103	0.996388	-3.6501	87.9152	0.602464	0.0408119	FALSE		Sample 18	Hrt	Male	3.M	6.11247	100	150	1200	3	100	32	MADKV20
35	B11	Sample 18		N2	FAM	UNKNOWN	FAM	NFQ-MGB	No Amp	Undetermined		0				FALSE	32228.9	TRUE	3	39					40.8103	0.996388	-3.6501	87.9152	0.602464	0.0408119	FALSE
36	B12	Sample 18		N2	FAM	UNKNOWN	FAM	NFQ-MGB	No Amp	Undetermined		0				FALSE	32228.9	TRUE	3	39					40.8103	0.996388	-3.6501	87.9152	0.602464	0.0408119	FALSE
58	C10	Sample 19		N2	FAM	UNKNOWN	FAM	NFQ-MGB	No Amp	Undetermined		0				FALSE	32228.9	TRUE	3	39					40.8103	0.996388	-3.6501	87.9152	0.602464	0.0408119	FALSE		Sample 19	Lvr	Male	3.M	0.686189	100	150	1200	3	100	55	MADKV20
59	C11	Sample 19		N2	FAM	UNKNOWN	FAM	NFQ-MGB	No Amp	Undetermined		0				FALSE	32228.9	TRUE	3	39					40.8103	0.996388	-3.6501	87.9152	0.602464	0.0408119	FALSE
60	C12	Sample 19		N2	FAM	UNKNOWN	FAM	NFQ-MGB	No Amp	Undetermined		0				FALSE	32228.9	TRUE	3	39					40.8103	0.996388	-3.6501	87.9152	0.602464	0.0408119	FALSE
82	D10	Sample 20		N2	FAM	UNKNOWN	FAM	NFQ-MGB	No Amp	Undetermined		0				FALSE	32228.9	TRUE	3	39					40.8103	0.996388	-3.6501	87.9152	0.602464	0.0408119	FALSE		Sample 20	Spln	Male	3.M	2.89431	100	150	1200	3	100	16	MADKV20
83	D11	Sample 20		N2	FAM	UNKNOWN	FAM	NFQ-MGB	No Amp	Undetermined		0				FALSE	32228.9	TRUE	3	39					40.8103	0.996388	-3.6501	87.9152	0.602464	0.0408119	FALSE
84	D12	Sample 20		N2	FAM	UNKNOWN	FAM	NFQ-MGB	No Amp	Undetermined		0				FALSE	32228.9	TRUE	3	39					40.8103	0.996388	-3.6501	87.9152	0.602464	0.0408119	FALSE
106	E10	Sample 21		N2	FAM	UNKNOWN	FAM	NFQ-MGB	No Amp	Undetermined		0				FALSE	32228.9	TRUE	3	39					40.8103	0.996388	-3.6501	87.9152	0.602464	0.0408119	FALSE		Sample 21	Stom	Male	3.M	4.76997	100	150	1200	3	100	19	MADKV20
107	E11	Sample 21		N2	FAM	UNKNOWN	FAM	NFQ-MGB	No Amp	Undetermined		0				FALSE	32228.9	TRUE	3	39					40.8103	0.996388	-3.6501	87.9152	0.602464	0.0408119	FALSE
108	E12	Sample 21		N2	FAM	UNKNOWN	FAM	NFQ-MGB	No Amp	Undetermined		0				FALSE	32228.9	TRUE	3	39					40.8103	0.996388	-3.6501	87.9152	0.602464	0.0408119	FALSE
130	F10	Sample 22		N2	FAM	UNKNOWN	FAM	NFQ-MGB	No Amp	Undetermined		0				FALSE	32228.9	TRUE	3	39					40.8103	0.996388	-3.6501	87.9152	0.602464	0.0408119	FALSE		Sample 22	Kid	Male	3.M	1.26079	100	150	1200	3	100	77	MADKV20
131	F11	Sample 22		N2	FAM	UNKNOWN	FAM	NFQ-MGB	No Amp	Undetermined		0				FALSE	32228.9	TRUE	3	39					40.8103	0.996388	-3.6501	87.9152	0.602464	0.0408119	FALSE
132	F12	Sample 22		N2	FAM	UNKNOWN	FAM	NFQ-MGB	No Amp	Undetermined		0				FALSE	32228.9	TRUE	3	39					40.8103	0.996388	-3.6501	87.9152	0.602464	0.0408119	FALSE
154	G10	Sample 23		N2	FAM	UNKNOWN	FAM	NFQ-MGB	No Amp	Undetermined		0				FALSE	32228.9	TRUE	3	39					40.8103	0.996388	-3.6501	87.9152	0.602464	0.0408119	FALSE		Sample 23	Duo	Male	3.M	3.25754	100	150	1200	3	100	21	MADKV20
155	G11	Sample 23		N2	FAM	UNKNOWN	FAM	NFQ-MGB	No Amp	Undetermined		0				FALSE	32228.9	TRUE	3	39					40.8103	0.996388	-3.6501	87.9152	0.602464	0.0408119	FALSE
156	G12	Sample 23		N2	FAM	UNKNOWN	FAM	NFQ-MGB	No Amp	Undetermined		0				FALSE	32228.9	TRUE	3	39					40.8103	0.996388	-3.6501	87.9152	0.602464	0.0408119	FALSE
202	I10	Sample 25	1.2539e+07	N2	FAM	UNKNOWN	FAM	NFQ-MGB	Amp	14.9009	14.7345	0.972754	0.200447	1.40025e+07	1.80953e+06	FALSE	32228.9	TRUE	3	9					40.8103	0.996388	-3.6501	87.9152	0.602464	0.0408119	FALSE		Sample 25	Lung	Male	1.2	1.88941	100	150	1200	3	100	45	MADKV20
203	I11	Sample 25	1.60258e+07	N2	FAM	UNKNOWN	FAM	NFQ-MGB	Amp	14.512	14.7345	0.96793	0.200447	1.40025e+07	1.80953e+06	FALSE	32228.9	TRUE	3	7					40.8103	0.996388	-3.6501	87.9152	0.602464	0.0408119	FALSE
204	I12	Sample 25	1.34429e+07	N2	FAM	UNKNOWN	FAM	NFQ-MGB	Amp	14.7906	14.7345	0.980035	0.200447	1.40025e+07	1.80953e+06	FALSE	32228.9	TRUE	3	7					40.8103	0.996388	-3.6501	87.9152	0.602464	0.0408119	FALSE
226	J10	Sample 26	18484.4	N2	FAM	UNKNOWN	FAM	NFQ-MGB	Amp	25.236	25.1371	0.97863	0.0932591	19697	1151.52	FALSE	32228.9	TRUE	3	16					40.8103	0.996388	-3.6501	87.9152	0.602464	0.0408119	FALSE		Sample 26	Hrt	Male	1.2	8.22335	100	150	1200	3	100	18	MADKV20
227	J11	Sample 26	20775.8	N2	FAM	UNKNOWN	FAM	NFQ-MGB	Amp	25.0508	25.1371	0.985411	0.0932591	19697	1151.52	FALSE	32228.9	TRUE	3	16					40.8103	0.996388	-3.6501	87.9152	0.602464	0.0408119	FALSE
228	J12	Sample 26	19830.7	N2	FAM	UNKNOWN	FAM	NFQ-MGB	Amp	25.1246	25.1371	0.969422	0.0932591	19697	1151.52	FALSE	32228.9	TRUE	3	16					40.8103	0.996388	-3.6501	87.9152	0.602464	0.0408119	FALSE
250	K10	Sample 27	25.6768	N2	FAM	UNKNOWN	FAM	NFQ-MGB	Amp	35.6653	35.6318	0.963659	0.286936	26.5157	4.85337	FALSE	32228.9	TRUE	3	27					40.8103	0.996388	-3.6501	87.9152	0.602464	0.0408119	FALSE		Sample 27	Lvr	Male	1.2	0.5	100	150	1200	3	100	35	MADKV20
251	K11	Sample 27	31.7338	N2	FAM	UNKNOWN	FAM	NFQ-MGB	Amp	35.3296	35.6318	0.97141	0.286936	26.5157	4.85337	FALSE	32228.9	TRUE	3	27					40.8103	0.996388	-3.6501	87.9152	0.602464	0.0408119	FALSE
252	K12	Sample 27	22.1364	N2	FAM	UNKNOWN	FAM	NFQ-MGB	Amp	35.9005	35.6318	0.975673	0.286936	26.5157	4.85337	FALSE	32228.9	TRUE	3	29					40.8103	0.996388	-3.6501	87.9152	0.602464	0.0408119	FALSE
274	L10	Sample 28	11.679	N2	FAM	UNKNOWN	FAM	NFQ-MGB	Amp	36.9142	36.3564	0.962767	0.610406	17.4585	6.86902	FALSE	32228.9	TRUE	3	27					40.8103	0.996388	-3.6501	87.9152	0.602464	0.0408119	FALSE		Sample 28	Spln	Male	1.2	3.2317	100	150	1200	3	100	15	MADKV20
275	L11	Sample 28	15.6437	N2	FAM	UNKNOWN	FAM	NFQ-MGB	Amp	36.4508	36.3564	0.952514	0.610406	17.4585	6.86902	FALSE	32228.9	TRUE	3	24					40.8103	0.996388	-3.6501	87.9152	0.602464	0.0408119	FALSE
276	L12	Sample 28	25.0527	N2	FAM	UNKNOWN	FAM	NFQ-MGB	Amp	35.7043	36.3564	0.973405	0.610406	17.4585	6.86902	FALSE	32228.9	TRUE	3	30					40.8103	0.996388	-3.6501	87.9152	0.602464	0.0408119	FALSE
298	M10	Sample 29	1306.24	N2	FAM	UNKNOWN	FAM	NFQ-MGB	Amp	29.4365	29.5185	0.979691	0.0772544	1241.37	60.776	FALSE	32228.9	TRUE	3	19					40.8103	0.996388	-3.6501	87.9152	0.602464	0.0408119	FALSE		Sample 29	Stom	Male	1.2	1.28582	100	150	1200	3	100	38	MADKV20
299	M11	Sample 29	1232.12	N2	FAM	UNKNOWN	FAM	NFQ-MGB	Amp	29.5291	29.5185	0.981031	0.0772544	1241.37	60.776	FALSE	32228.9	TRUE	3	22					40.8103	0.996388	-3.6501	87.9152	0.602464	0.0408119	FALSE
300	M12	Sample 29	1185.75	N2	FAM	UNKNOWN	FAM	NFQ-MGB	Amp	29.5899	29.5185	0.977419	0.0772544	1241.37	60.776	FALSE	32228.9	TRUE	3	19					40.8103	0.996388	-3.6501	87.9152	0.602464	0.0408119	FALSE
322	N10	Sample 30	14.1998	N2	FAM	UNKNOWN	FAM	NFQ-MGB	Amp	36.6044	36.836	0.958104	0.415479	12.5374	3.00746	FALSE	32228.9	TRUE	3	28					40.8103	0.996388	-3.6501	87.9152	0.602464	0.0408119	FALSE		Sample 30	Kid	Male	1.2	10.9445	100	150	1200	3	100	34	MADKV20
323	N11	Sample 30	9.06568	N2	FAM	UNKNOWN	FAM	NFQ-MGB	Amp	37.3157	36.836	0.934479	0.415479	12.5374	3.00746	FALSE	32228.9	TRUE	3	30					40.8103	0.996388	-3.6501	87.9152	0.602464	0.0408119	FALSE
324	N12	Sample 30	14.3466	N2	FAM	UNKNOWN	FAM	NFQ-MGB	Amp	36.588	36.836	0.96452	0.415479	12.5374	3.00746	FALSE	32228.9	TRUE	3	26					40.8103	0.996388	-3.6501	87.9152	0.602464	0.0408119	FALSE
346	O10	Sample 31		N2	FAM	UNKNOWN	FAM	NFQ-MGB	No Amp	Undetermined		0				FALSE	32228.9	TRUE	3	39					40.8103	0.996388	-3.6501	87.9152	0.602464	0.0408119	FALSE		Sample 31	Duo	Male	1.2	0.748425	100	150	1200	3	100	19	MADKV20
347	O11	Sample 31		N2	FAM	UNKNOWN	FAM	NFQ-MGB	No Amp	Undetermined		0				FALSE	32228.9	TRUE	3	39					40.8103	0.996388	-3.6501	87.9152	0.602464	0.0408119	FALSE
348	O12	Sample 31		N2	FAM	UNKNOWN	FAM	NFQ-MGB	No Amp	Undetermined		0				FALSE	32228.9	TRUE	3	39					40.8103	0.996388	-3.6501	87.9152	0.602464	0.0408119	FALSE
13	A13	Sample 33	3.67192e+07	N2	FAM	UNKNOWN	FAM	NFQ-MGB	Amp	13.1977	13.0131	0.707685	0.31693	4.18276e+07	8.78172e+06	FALSE	32228.9	TRUE	3	7					40.8103	0.996388	-3.6501	87.9152	0.602464	0.0408119	FALSE		Sample 33	Lung	Male	2.2	1.96895	100	150	1200	3	100	43	MADKV20
14	A14	Sample 33	3.67958e+07	N2	FAM	UNKNOWN	FAM	NFQ-MGB	Amp	13.1944	13.0131	0.694701	0.31693	4.18276e+07	8.78172e+06	FALSE	32228.9	TRUE	3	9					40.8103	0.996388	-3.6501	87.9152	0.602464	0.0408119	FALSE
15	A15	Sample 33	5.19677e+07	N2	FAM	UNKNOWN	FAM	NFQ-MGB	Amp	12.6471	13.0131	0.561323	0.31693	4.18276e+07	8.78172e+06	FALSE	32228.9	TRUE	3	8					40.8103	0.996388	-3.6501	87.9152	0.602464	0.0408119	FALSE
37	B13	Sample 34	1346.8	N2	FAM	UNKNOWN	FAM	NFQ-MGB	Amp	29.388	29.2048	0.985784	0.159332	1516.83	147.96	FALSE	32228.9	TRUE	3	24					40.8103	0.996388	-3.6501	87.9152	0.602464	0.0408119	FALSE		Sample 34	Hrt	Male	2.2	9.29282	100	150	1200	3	100	13	MADKV20
38	B14	Sample 34	1616.3	N2	FAM	UNKNOWN	FAM	NFQ-MGB	Amp	29.0989	29.2048	0.984869	0.159332	1516.83	147.96	FALSE	32228.9	TRUE	3	21					40.8103	0.996388	-3.6501	87.9152	0.602464	0.0408119	FALSE
39	B15	Sample 34	1587.39	N2	FAM	UNKNOWN	FAM	NFQ-MGB	Amp	29.1275	29.2048	0.975426	0.159332	1516.83	147.96	FALSE	32228.9	TRUE	3	23					40.8103	0.996388	-3.6501	87.9152	0.602464	0.0408119	FALSE
61	C13	Sample 35	40.1984	N2	FAM	UNKNOWN	FAM	NFQ-MGB	Amp	34.9548	35.4706	0.971149	0.589096	30.333	10.4604	FALSE	32228.9	TRUE	3	27					40.8103	0.996388	-3.6501	87.9152	0.602464	0.0408119	FALSE		Sample 35	Lvr	Male	2.2	0.423876	100	150	1200	3	100	45	MADKV20
62	C14	Sample 35	19.365	N2	FAM	UNKNOWN	FAM	NFQ-MGB	Amp	36.1126	35.4706	0.94843	0.589096	30.333	10.4604	FALSE	32228.9	TRUE	3	26					40.8103	0.996388	-3.6501	87.9152	0.602464	0.0408119	FALSE
63	C15	Sample 35	31.4355	N2	FAM	UNKNOWN	FAM	NFQ-MGB	Amp	35.3446	35.4706	0.967075	0.589096	30.333	10.4604	FALSE	32228.9	TRUE	3	27					40.8103	0.996388	-3.6501	87.9152	0.602464	0.0408119	FALSE
85	D13	Sample 36	5.44189	N2	FAM	UNKNOWN	FAM	NFQ-MGB	Inconclusive	38.1247	36.4917	0.90256	1.44683	19.1426	12.8533	FALSE	32228.9	TRUE	3	32					40.8103	0.996388	-3.6501	87.9152	0.602464	0.0408119	FALSE		Sample 36	Spln	Male	2.2	0.981195	100	150	1200	3	100	32	MADKV20
86	D14	Sample 36	21.051	N2	FAM	UNKNOWN	FAM	NFQ-MGB	Amp	35.9802	36.4917	0.942931	1.44683	19.1426	12.8533	FALSE	32228.9	TRUE	3	28					40.8103	0.996388	-3.6501	87.9152	0.602464	0.0408119	FALSE
87	D15	Sample 36	30.9351	N2	FAM	UNKNOWN	FAM	NFQ-MGB	Amp	35.37	36.4917	0.965918	1.44683	19.1426	12.8533	FALSE	32228.9	TRUE	3	24					40.8103	0.996388	-3.6501	87.9152	0.602464	0.0408119	FALSE
109	E13	Sample 37	437.925	N2	FAM	UNKNOWN	FAM	NFQ-MGB	Amp	31.1689	31.1909	0.980493	0.0460853	432.03	12.4574	FALSE	32228.9	TRUE	3	24					40.8103	0.996388	-3.6501	87.9152	0.602464	0.0408119	FALSE		Sample 37	Stom	Male	2.2	1.13897	100	150	1200	3	100	60	MADKV20
110	E14	Sample 37	440.445	N2	FAM	UNKNOWN	FAM	NFQ-MGB	Amp	31.1598	31.1909	0.977005	0.0460853	432.03	12.4574	FALSE	32228.9	TRUE	3	23					40.8103	0.996388	-3.6501	87.9152	0.602464	0.0408119	FALSE
111	E15	Sample 37	417.719	N2	FAM	UNKNOWN	FAM	NFQ-MGB	Amp	31.2438	31.1909	0.980499	0.0460853	432.03	12.4574	FALSE	32228.9	TRUE	3	25					40.8103	0.996388	-3.6501	87.9152	0.602464	0.0408119	FALSE
133	F13	Sample 38		N2	FAM	UNKNOWN	FAM	NFQ-MGB	No Amp	Undetermined	37.0021	0	0.469694			FALSE	32228.9	TRUE	3	32					40.8103	0.996388	-3.6501	87.9152	0.602464	0.0408119	FALSE		Sample 38	Kid	Male	2.2	1.78239	100	150	1200	3	100	54	MADKV20
134	F14	Sample 38	8.96009	N2	FAM	UNKNOWN	FAM	NFQ-MGB	Amp	37.3343	37.0021	0.941039	0.469694			FALSE	32228.9	TRUE	3	26					40.8103	0.996388	-3.6501	87.9152	0.602464	0.0408119	FALSE
135	F15	Sample 38	13.6236	N2	FAM	UNKNOWN	FAM	NFQ-MGB	Amp	36.67	37.0021	0.965619	0.469694			FALSE	32228.9	TRUE	3	28					40.8103	0.996388	-3.6501	87.9152	0.602464	0.0408119	FALSE
157	G13	Sample 39		N2	FAM	UNKNOWN	FAM	NFQ-MGB	No Amp	Undetermined	38.8773	0				FALSE	32228.9	TRUE	3	39					40.8103	0.996388	-3.6501	87.9152	0.602464	0.0408119	FALSE		Sample 39	Duo	Male	3.2	1.59893	100	150	1200	3	100	33	MADKV20
158	G14	Sample 39		N2	FAM	UNKNOWN	FAM	NFQ-MGB	No Amp	Undetermined	38.8773	0				FALSE	32228.9	TRUE	3	39					40.8103	0.996388	-3.6501	87.9152	0.602464	0.0408119	FALSE
159	G15	Sample 39	3.3852	N2	FAM	UNKNOWN	FAM	NFQ-MGB	Inconclusive	38.8773	38.8773	0.167193				FALSE	32228.9	TRUE	3	31					40.8103	0.996388	-3.6501	87.9152	0.602464	0.0408119	FALSE
205	I13	Sample 41	1.42945e+07	N2	FAM	UNKNOWN	FAM	NFQ-MGB	Amp	14.6932	14.7839	0.974048	0.0785067	1.35111e+07	678410	FALSE	32228.9	TRUE	3	7					40.8103	0.996388	-3.6501	87.9152	0.602464	0.0408119	FALSE		Sample 41	Lung	Male	3.2	4.56121	100	150	1200	3	100	13	MADKV20
206	I14	Sample 41	1.31215e+07	N2	FAM	UNKNOWN	FAM	NFQ-MGB	Amp	14.8289	14.7839	0.964112	0.0785067	1.35111e+07	678410	FALSE	32228.9	TRUE	3	8					40.8103	0.996388	-3.6501	87.9152	0.602464	0.0408119	FALSE
207	I15	Sample 41	1.31174e+07	N2	FAM	UNKNOWN	FAM	NFQ-MGB	Amp	14.8294	14.7839	0.993427	0.0785067	1.35111e+07	678410	FALSE	32228.9	TRUE	3	7					40.8103	0.996388	-3.6501	87.9152	0.602464	0.0408119	FALSE
229	J13	Sample 42	36.3508	N2	FAM	UNKNOWN	FAM	NFQ-MGB	Amp	35.1143	35.4202	0.96353	0.423619	30.6546	7.54956	FALSE	32228.9	TRUE	3	23					40.8103	0.996388	-3.6501	87.9152	0.602464	0.0408119	FALSE		Sample 42	Hrt	Male	3.2	5.27774	100	150	1200	3	100	22	MADKV20
230	J14	Sample 42	22.0915	N2	FAM	UNKNOWN	FAM	NFQ-MGB	Amp	35.9037	35.4202	0.968451	0.423619	30.6546	7.54956	FALSE	32228.9	TRUE	3	28					40.8103	0.996388	-3.6501	87.9152	0.602464	0.0408119	FALSE
231	J15	Sample 42	33.5214	N2	FAM	UNKNOWN	FAM	NFQ-MGB	Amp	35.2427	35.4202	0.971381	0.423619	30.6546	7.54956	FALSE	32228.9	TRUE	3	24					40.8103	0.996388	-3.6501	87.9152	0.602464	0.0408119	FALSE
253	K13	Sample 43	17.5293	N2	FAM	UNKNOWN	FAM	NFQ-MGB	Amp	36.2704	35.6325	0.945887	0.582565	27.359	9.30164	FALSE	32228.9	TRUE	3	28					40.8103	0.996388	-3.6501	87.9152	0.602464	0.0408119	FALSE		Sample 43	Lvr	Male	3.2	0.676222	100	150	1200	3	100	89	MADKV20
254	K14	Sample 43	28.5251	N2	FAM	UNKNOWN	FAM	NFQ-MGB	Amp	35.4986	35.6325	0.968845	0.582565	27.359	9.30164	FALSE	32228.9	TRUE	3	29					40.8103	0.996388	-3.6501	87.9152	0.602464	0.0408119	FALSE
255	K15	Sample 43	36.0227	N2	FAM	UNKNOWN	FAM	NFQ-MGB	Amp	35.1286	35.6325	0.970186	0.582565	27.359	9.30164	FALSE	32228.9	TRUE	3	26					40.8103	0.996388	-3.6501	87.9152	0.602464	0.0408119	FALSE
277	L13	Sample 44	31.9762	N2	FAM	UNKNOWN	FAM	NFQ-MGB	Amp	35.3175	35.4538	0.816042	0.158522	29.4386	2.89049	FALSE	32228.9	TRUE	3	28					40.8103	0.996388	-3.6501	87.9152	0.602464	0.0408119	FALSE		Sample 44	Spln	Male	3.2	2.70084	100	150	1200	3	100	19	MADKV20
278	L14	Sample 44	30.0474	N2	FAM	UNKNOWN	FAM	NFQ-MGB	Amp	35.4162	35.4538	0.961176	0.158522	29.4386	2.89049	FALSE	32228.9	TRUE	3	28					40.8103	0.996388	-3.6501	87.9152	0.602464	0.0408119	FALSE
279	L15	Sample 44	26.2922	N2	FAM	UNKNOWN	FAM	NFQ-MGB	Amp	35.6278	35.4538	0.970588	0.158522	29.4386	2.89049	FALSE	32228.9	TRUE	3	26					40.8103	0.996388	-3.6501	87.9152	0.602464	0.0408119	FALSE
301	M13	Sample 45	336.302	N2	FAM	UNKNOWN	FAM	NFQ-MGB	Amp	31.5875	31.6444	0.980221	0.0632941	324.614	12.8916	FALSE	32228.9	TRUE	3	24					40.8103	0.996388	-3.6501	87.9152	0.602464	0.0408119	FALSE		Sample 45	Stom	Male	3.2	2.01873	100	150	1200	3	100	57	MADKV20
302	M14	Sample 45	326.754	N2	FAM	UNKNOWN	FAM	NFQ-MGB	Amp	31.6331	31.6444	0.979749	0.0632941	324.614	12.8916	FALSE	32228.9	TRUE	3	23					40.8103	0.996388	-3.6501	87.9152	0.602464	0.0408119	FALSE
303	M15	Sample 45	310.787	N2	FAM	UNKNOWN	FAM	NFQ-MGB	Amp	31.7126	31.6444	0.983405	0.0632941	324.614	12.8916	FALSE	32228.9	TRUE	3	22					40.8103	0.996388	-3.6501	87.9152	0.602464	0.0408119	FALSE
325	N13	Sample 46	3.42632	N2	FAM	UNKNOWN	FAM	NFQ-MGB	Inconclusive	38.8581	39.1884	0.182165	0.30371	2.81664	0.552127	FALSE	32228.9	TRUE	3	29					40.8103	0.996388	-3.6501	87.9152	0.602464	0.0408119	FALSE		Sample 46	Kid	Male	3.2	1.84879	100	150	1200	3	100	65	MADKV20
326	N14	Sample 46	2.35036	N2	FAM	UNKNOWN	FAM	NFQ-MGB	Inconclusive	39.4556	39.1884	0	0.30371	2.81664	0.552127	FALSE	32228.9	TRUE	3	30					40.8103	0.996388	-3.6501	87.9152	0.602464	0.0408119	FALSE
327	N15	Sample 46	2.67325	N2	FAM	UNKNOWN	FAM	NFQ-MGB	Inconclusive	39.2516	39.1884	0	0.30371	2.81664	0.552127	FALSE	32228.9	TRUE	3	30					40.8103	0.996388	-3.6501	87.9152	0.602464	0.0408119	FALSE
349	O13	Sample 47	3.04184	N2	FAM	UNKNOWN	FAM	NFQ-MGB	Inconclusive	39.0468	38.941	0	0.149635			FALSE	32228.9	TRUE	3	31					40.8103	0.996388	-3.6501	87.9152	0.602464	0.0408119	FALSE		Sample 47	Duo	Male	2.2	1.04554	100	150	1200	3	100	34	MADKV20
350	O14	Sample 47	3.47625	N2	FAM	UNKNOWN	FAM	NFQ-MGB	Inconclusive	38.8352	38.941	0.20788	0.149635			FALSE	32228.9	TRUE	3	29					40.8103	0.996388	-3.6501	87.9152	0.602464	0.0408119	FALSE
351	O15	Sample 47		N2	FAM	UNKNOWN	FAM	NFQ-MGB	No Amp	Undetermined	38.941	0	0.149635			FALSE	32228.9	TRUE	3	39					40.8103	0.996388	-3.6501	87.9152	0.602464	0.0408119	FALSE
16	A16	Sample 49	656803	N2	FAM	UNKNOWN	FAM	NFQ-MGB	Amp	19.5761	19.5699	0.985183	0.0200782	659385	8373.47	FALSE	32228.9	TRUE	3	14					40.8103	0.996388	-3.6501	87.9152	0.602464	0.0408119	FALSE		Sample 49	Lung	Male	1.4	2.32067	100	150	1200	3	100	20	MADKV20
17	A17	Sample 49	668746	N2	FAM	UNKNOWN	FAM	NFQ-MGB	Amp	19.5475	19.5699	0.953367	0.0200782	659385	8373.47	FALSE	32228.9	TRUE	3	15					40.8103	0.996388	-3.6501	87.9152	0.602464	0.0408119	FALSE
18	A18	Sample 49	652607	N2	FAM	UNKNOWN	FAM	NFQ-MGB	Amp	19.5862	19.5699	0.989766	0.0200782	659385	8373.47	FALSE	32228.9	TRUE	3	14					40.8103	0.996388	-3.6501	87.9152	0.602464	0.0408119	FALSE
40	B16	Sample 50	21.5116	N2	FAM	UNKNOWN	FAM	NFQ-MGB	Amp	35.9459	35.9894	0.959108	0.485675	21.5801	6.4045	FALSE	32228.9	TRUE	3	30					40.8103	0.996388	-3.6501	87.9152	0.602464	0.0408119	FALSE		Sample 50	Hrt	Male	1.4	5.72639	100	150	1200	3	100	29	MADKV20
41	B17	Sample 50	28.0186	N2	FAM	UNKNOWN	FAM	NFQ-MGB	Amp	35.527	35.9894	0.955884	0.485675	21.5801	6.4045	FALSE	32228.9	TRUE	3	29					40.8103	0.996388	-3.6501	87.9152	0.602464	0.0408119	FALSE
42	B18	Sample 50	15.2101	N2	FAM	UNKNOWN	FAM	NFQ-MGB	Inconclusive	36.4954	35.9894	0.951617	0.485675	21.5801	6.4045	FALSE	32228.9	TRUE	3	30					40.8103	0.996388	-3.6501	87.9152	0.602464	0.0408119	FALSE
64	C16	Sample 51		N2	FAM	UNKNOWN	FAM	NFQ-MGB	No Amp	Undetermined		0				FALSE	32228.9	TRUE	3	39					40.8103	0.996388	-3.6501	87.9152	0.602464	0.0408119	FALSE		Sample 51	Lvr	Male	1.4	0.5	100	150	1200	3	100	51	MADKV20
65	C17	Sample 51		N2	FAM	UNKNOWN	FAM	NFQ-MGB	No Amp	Undetermined		0				FALSE	32228.9	TRUE	3	39					40.8103	0.996388	-3.6501	87.9152	0.602464	0.0408119	FALSE
66	C18	Sample 51		N2	FAM	UNKNOWN	FAM	NFQ-MGB	No Amp	Undetermined		0				FALSE	32228.9	TRUE	3	39					40.8103	0.996388	-3.6501	87.9152	0.602464	0.0408119	FALSE
88	D16	Sample 52	40.6418	N2	FAM	UNKNOWN	FAM	NFQ-MGB	Amp	34.9374	34.9446	0.976752	0.0682287	40.4825	1.73611	FALSE	32228.9	TRUE	3	26					40.8103	0.996388	-3.6501	87.9152	0.602464	0.0408119	FALSE		Sample 52	Spln	Male	1.4	3.29881	100	150	1200	3	100	18	MADKV20
89	D17	Sample 52	38.6722	N2	FAM	UNKNOWN	FAM	NFQ-MGB	Amp	35.0161	34.9446	0.965316	0.0682287	40.4825	1.73611	FALSE	32228.9	TRUE	3	27					40.8103	0.996388	-3.6501	87.9152	0.602464	0.0408119	FALSE
90	D18	Sample 52	42.1335	N2	FAM	UNKNOWN	FAM	NFQ-MGB	Amp	34.8802	34.9446	0.979852	0.0682287	40.4825	1.73611	FALSE	32228.9	TRUE	3	29					40.8103	0.996388	-3.6501	87.9152	0.602464	0.0408119	FALSE
112	E16	Sample 53	17.3224	N2	FAM	UNKNOWN	FAM	NFQ-MGB	Amp	36.2893	36.1206	0.95128	0.195145	19.3654	2.4268	FALSE	32228.9	TRUE	3	29					40.8103	0.996388	-3.6501	87.9152	0.602464	0.0408119	FALSE		Sample 53	Stom	Male	1.4	2.10058	100	150	1200	3	100	70	MADKV20
113	E17	Sample 53	22.0479	N2	FAM	UNKNOWN	FAM	NFQ-MGB	Amp	35.9069	36.1206	0.971583	0.195145	19.3654	2.4268	FALSE	32228.9	TRUE	3	25					40.8103	0.996388	-3.6501	87.9152	0.602464	0.0408119	FALSE
114	E18	Sample 53	18.7257	N2	FAM	UNKNOWN	FAM	NFQ-MGB	Amp	36.1658	36.1206	0.969498	0.195145	19.3654	2.4268	FALSE	32228.9	TRUE	3	30					40.8103	0.996388	-3.6501	87.9152	0.602464	0.0408119	FALSE
136	F16	Sample 54		N2	FAM	UNKNOWN	FAM	NFQ-MGB	No Amp	Undetermined		0				FALSE	32228.9	TRUE	3	39					40.8103	0.996388	-3.6501	87.9152	0.602464	0.0408119	FALSE		Sample 54	Kid	Male	1.4	1.3695	100	150	1200	3	100	65	MADKV20
137	F17	Sample 54		N2	FAM	UNKNOWN	FAM	NFQ-MGB	No Amp	Undetermined		0				FALSE	32228.9	TRUE	3	39					40.8103	0.996388	-3.6501	87.9152	0.602464	0.0408119	FALSE
138	F18	Sample 54		N2	FAM	UNKNOWN	FAM	NFQ-MGB	No Amp	Undetermined		0				FALSE	32228.9	TRUE	3	39					40.8103	0.996388	-3.6501	87.9152	0.602464	0.0408119	FALSE
160	G16	Sample 55		N2	FAM	UNKNOWN	FAM	NFQ-MGB	No Amp	Undetermined	38.9896	0	0.123154			FALSE	32228.9	TRUE	3	39					40.8103	0.996388	-3.6501	87.9152	0.602464	0.0408119	FALSE		Sample 55	Duo	Male	1.4	1.48165	100	150	1200	3	100	39	MADKV20
161	G17	Sample 55	3.33178	N2	FAM	UNKNOWN	FAM	NFQ-MGB	Inconclusive	38.9025	38.9896	0.11068	0.123154			FALSE	32228.9	TRUE	3	31					40.8103	0.996388	-3.6501	87.9152	0.602464	0.0408119	FALSE
162	G18	Sample 55	2.98511	N2	FAM	UNKNOWN	FAM	NFQ-MGB	Inconclusive	39.0766	38.9896	0	0.123154			FALSE	32228.9	TRUE	3	30					40.8103	0.996388	-3.6501	87.9152	0.602464	0.0408119	FALSE
208	I16	Sample 57	136973	N2	FAM	UNKNOWN	FAM	NFQ-MGB	Amp	22.0611	22.0454	0.983451	0.0536094	138390	4711.14	FALSE	32228.9	TRUE	3	16					40.8103	0.996388	-3.6501	87.9152	0.602464	0.0408119	FALSE		Sample 57	Lung	Male	2.4	4.17824	100	150	1200	3	100	15	MADKV20
209	I17	Sample 57	134551	N2	FAM	UNKNOWN	FAM	NFQ-MGB	Amp	22.0893	22.0454	0.9791	0.0536094	138390	4711.14	FALSE	32228.9	TRUE	3	14					40.8103	0.996388	-3.6501	87.9152	0.602464	0.0408119	FALSE
210	I18	Sample 57	143648	N2	FAM	UNKNOWN	FAM	NFQ-MGB	Amp	21.9856	22.0454	0.978083	0.0536094	138390	4711.14	FALSE	32228.9	TRUE	3	15					40.8103	0.996388	-3.6501	87.9152	0.602464	0.0408119	FALSE
232	J16	Sample 58		N2	FAM	UNKNOWN	FAM	NFQ-MGB	No Amp	Undetermined	38.0542	0	0.314232			FALSE	32228.9	TRUE	3	32					40.8103	0.996388	-3.6501	87.9152	0.602464	0.0408119	FALSE		Sample 58	Hrt	Male	2.4	3.60646	100	150	1200	3	100	34	MADKV20
233	J17	Sample 58	4.94526	N2	FAM	UNKNOWN	FAM	NFQ-MGB	Inconclusive	38.2764	38.0542	0.807532	0.314232			FALSE	32228.9	TRUE	3	28					40.8103	0.996388	-3.6501	87.9152	0.602464	0.0408119	FALSE
234	J18	Sample 58	6.54541	N2	FAM	UNKNOWN	FAM	NFQ-MGB	Amp	37.832	38.0542	0.954567	0.314232			FALSE	32228.9	TRUE	3	28					40.8103	0.996388	-3.6501	87.9152	0.602464	0.0408119	FALSE
256	K16	Sample 59		N2	FAM	UNKNOWN	FAM	NFQ-MGB	No Amp	Undetermined		0				FALSE	32228.9	TRUE	3	39					40.8103	0.996388	-3.6501	87.9152	0.602464	0.0408119	FALSE		Sample 59	Lvr	Male	2.4	1.08269	100	150	1200	3	100	25	MADKV20
257	K17	Sample 59		N2	FAM	UNKNOWN	FAM	NFQ-MGB	No Amp	Undetermined		0				FALSE	32228.9	TRUE	3	39					40.8103	0.996388	-3.6501	87.9152	0.602464	0.0408119	FALSE
258	K18	Sample 59		N2	FAM	UNKNOWN	FAM	NFQ-MGB	No Amp	Undetermined		0				FALSE	32228.9	TRUE	3	39					40.8103	0.996388	-3.6501	87.9152	0.602464	0.0408119	FALSE
280	L16	Sample 60	7.51867	N2	FAM	UNKNOWN	FAM	NFQ-MGB	Amp	37.6123	37.2984	0.930231	0.443971			FALSE	32228.9	TRUE	3	26					40.8103	0.996388	-3.6501	87.9152	0.602464	0.0408119	FALSE		Sample 60	Spln	Male	2.4	1.09524	100	150	1200	3	100	21	MADKV20
281	L17	Sample 60	11.1726	N2	FAM	UNKNOWN	FAM	NFQ-MGB	Amp	36.9844	37.2984	0.954788	0.443971			FALSE	32228.9	TRUE	3	28					40.8103	0.996388	-3.6501	87.9152	0.602464	0.0408119	FALSE
282	L18	Sample 60		N2	FAM	UNKNOWN	FAM	NFQ-MGB	No Amp	Undetermined	37.2984	0	0.443971			FALSE	32228.9	TRUE	3	39					40.8103	0.996388	-3.6501	87.9152	0.602464	0.0408119	FALSE
304	M16	Sample 61		N2	FAM	UNKNOWN	FAM	NFQ-MGB	No Amp	Undetermined		0				FALSE	32228.9	TRUE	3	39					40.8103	0.996388	-3.6501	87.9152	0.602464	0.0408119	FALSE		Sample 61	Stom	Male	2.4	1.59571	100	150	1200	3	100	65	MADKV20
305	M17	Sample 61		N2	FAM	UNKNOWN	FAM	NFQ-MGB	No Amp	Undetermined		0				FALSE	32228.9	TRUE	3	39					40.8103	0.996388	-3.6501	87.9152	0.602464	0.0408119	FALSE
306	M18	Sample 61		N2	FAM	UNKNOWN	FAM	NFQ-MGB	No Amp	Undetermined		0				FALSE	32228.9	TRUE	3	39					40.8103	0.996388	-3.6501	87.9152	0.602464	0.0408119	FALSE
328	N16	Sample 62	44.1128	N2	FAM	UNKNOWN	FAM	NFQ-MGB	Amp	34.8075	34.5705	0.979934	0.205306	51.5065	6.40504	FALSE	32228.9	TRUE	3	28					40.8103	0.996388	-3.6501	87.9152	0.602464	0.0408119	FALSE		Sample 62	Kid	Male	2.4	1.31362	100	150	1200	3	100	68	MADKV20
329	N17	Sample 62	55.0444	N2	FAM	UNKNOWN	FAM	NFQ-MGB	Amp	34.4565	34.5705	0.976476	0.205306	51.5065	6.40504	FALSE	32228.9	TRUE	3	25					40.8103	0.996388	-3.6501	87.9152	0.602464	0.0408119	FALSE
330	N18	Sample 62	55.3622	N2	FAM	UNKNOWN	FAM	NFQ-MGB	Amp	34.4474	34.5705	0.967753	0.205306	51.5065	6.40504	FALSE	32228.9	TRUE	3	27					40.8103	0.996388	-3.6501	87.9152	0.602464	0.0408119	FALSE
352	O16	Sample 63		N2	FAM	UNKNOWN	FAM	NFQ-MGB	No Amp	Undetermined		0				FALSE	32228.9	TRUE	3	39					40.8103	0.996388	-3.6501	87.9152	0.602464	0.0408119	FALSE		Sample 63	Duo	Male	2.4	13	100	150	1200	3	100	11	MADKV20
353	O17	Sample 63		N2	FAM	UNKNOWN	FAM	NFQ-MGB	No Amp	Undetermined		0				FALSE	32228.9	TRUE	3	39					40.8103	0.996388	-3.6501	87.9152	0.602464	0.0408119	FALSE
354	O18	Sample 63		N2	FAM	UNKNOWN	FAM	NFQ-MGB	No Amp	Undetermined		0				FALSE	32228.9	TRUE	3	39					40.8103	0.996388	-3.6501	87.9152	0.602464	0.0408119	FALSE
19	A19	Sample 64	352686	N2	FAM	UNKNOWN	FAM	NFQ-MGB	Amp	20.5618	20.4557	0.984598	0.104567	377648	24860.5	FALSE	32228.9	TRUE	3	15					40.8103	0.996388	-3.6501	87.9152	0.602464	0.0408119	FALSE		Sample 64	Lung	Male	3.4	3.13603	100	150	1200	3	100	31	MADKV20
20	A20	Sample 64	402406	N2	FAM	UNKNOWN	FAM	NFQ-MGB	Amp	20.3527	20.4557	0.968016	0.104567	377648	24860.5	FALSE	32228.9	TRUE	3	10					40.8103	0.996388	-3.6501	87.9152	0.602464	0.0408119	FALSE
21	A21	Sample 64	377851	N2	FAM	UNKNOWN	FAM	NFQ-MGB	Amp	20.4525	20.4557	0.979179	0.104567	377648	24860.5	FALSE	32228.9	TRUE	3	10					40.8103	0.996388	-3.6501	87.9152	0.602464	0.0408119	FALSE
43	B19	Sample 65	4.94352	N2	FAM	UNKNOWN	FAM	NFQ-MGB	Inconclusive	38.277	37.2017	0.86433	1.01912	11.0772	6.42378	FALSE	32228.9	TRUE	3	31					40.8103	0.996388	-3.6501	87.9152	0.602464	0.0408119	FALSE		Sample 65	Hrt	Male	3.4	7.78847	100	150	1200	3	100	25	MADKV20
44	B20	Sample 65	17.7563	N2	FAM	UNKNOWN	FAM	NFQ-MGB	Amp	36.25	37.2017	0.964436	1.01912	11.0772	6.42378	FALSE	32228.9	TRUE	3	28					40.8103	0.996388	-3.6501	87.9152	0.602464	0.0408119	FALSE
45	B21	Sample 65	10.5317	N2	FAM	UNKNOWN	FAM	NFQ-MGB	Inconclusive	37.0781	37.2017	0.920846	1.01912	11.0772	6.42378	FALSE	32228.9	TRUE	3	32					40.8103	0.996388	-3.6501	87.9152	0.602464	0.0408119	FALSE
67	C19	Sample 66	5.68932	N2	FAM	UNKNOWN	FAM	NFQ-MGB	Inconclusive	38.0543	37.6356	0.92359	1.08412	8.74462	6.4063	FALSE	32228.9	TRUE	3	28					40.8103	0.996388	-3.6501	87.9152	0.602464	0.0408119	FALSE		Sample 66	Lvr	Male	3.4	0.5	100	150	1200	3	100	60	MADKV20
68	C20	Sample 66	4.43794	N2	FAM	UNKNOWN	FAM	NFQ-MGB	Inconclusive	38.448	37.6356	0.706077	1.08412	8.74462	6.4063	FALSE	32228.9	TRUE	3	32					40.8103	0.996388	-3.6501	87.9152	0.602464	0.0408119	FALSE
69	C21	Sample 66	16.1066	N2	FAM	UNKNOWN	FAM	NFQ-MGB	Amp	36.4046	37.6356	0.892434	1.08412	8.74462	6.4063	FALSE	32228.9	TRUE	3	26					40.8103	0.996388	-3.6501	87.9152	0.602464	0.0408119	FALSE
91	D19	Sample 67	36.8054	N2	FAM	UNKNOWN	FAM	NFQ-MGB	Amp	35.0946	34.3826	0.976209	0.653058	60.8418	23.0198	FALSE	32228.9	TRUE	3	24					40.8103	0.996388	-3.6501	87.9152	0.602464	0.0408119	FALSE		Sample 67	Spln	Male	3.4	2.56984	100	150	1200	3	100	19	MADKV20
92	D20	Sample 67	82.6887	N2	FAM	UNKNOWN	FAM	NFQ-MGB	Amp	33.8114	34.3826	0.970273	0.653058	60.8418	23.0198	FALSE	32228.9	TRUE	3	26					40.8103	0.996388	-3.6501	87.9152	0.602464	0.0408119	FALSE
93	D21	Sample 67	63.0314	N2	FAM	UNKNOWN	FAM	NFQ-MGB	Amp	34.2417	34.3826	0.974622	0.653058	60.8418	23.0198	FALSE	32228.9	TRUE	3	27					40.8103	0.996388	-3.6501	87.9152	0.602464	0.0408119	FALSE
115	E19	Sample 68	16.9687	N2	FAM	UNKNOWN	FAM	NFQ-MGB	Amp	36.322	35.3412	0.947921	0.857251	34.3489	15.3754	FALSE	32228.9	TRUE	3	31					40.8103	0.996388	-3.6501	87.9152	0.602464	0.0408119	FALSE		Sample 68	Stom	Male	3.4	1.43698	100	150	1200	3	100	63	MADKV20
116	E20	Sample 68	46.1776	N2	FAM	UNKNOWN	FAM	NFQ-MGB	Amp	34.735	35.3412	0.954411	0.857251	34.3489	15.3754	FALSE	32228.9	TRUE	3	23					40.8103	0.996388	-3.6501	87.9152	0.602464	0.0408119	FALSE
117	E21	Sample 68	39.9003	N2	FAM	UNKNOWN	FAM	NFQ-MGB	Amp	34.9666	35.3412	0.948748	0.857251	34.3489	15.3754	FALSE	32228.9	TRUE	3	26					40.8103	0.996388	-3.6501	87.9152	0.602464	0.0408119	FALSE
139	F19	Sample 69		N2	FAM	UNKNOWN	FAM	NFQ-MGB	No Amp	Undetermined		0				FALSE	32228.9	TRUE	3	39					40.8103	0.996388	-3.6501	87.9152	0.602464	0.0408119	FALSE		Sample 69	Kid	Male	3.4	1.08261	100	150	1200	3	100	84	MADKV20
140	F20	Sample 69		N2	FAM	UNKNOWN	FAM	NFQ-MGB	No Amp	Undetermined		0				FALSE	32228.9	TRUE	3	39					40.8103	0.996388	-3.6501	87.9152	0.602464	0.0408119	FALSE
141	F21	Sample 69		N2	FAM	UNKNOWN	FAM	NFQ-MGB	No Amp	Undetermined		0				FALSE	32228.9	TRUE	3	39					40.8103	0.996388	-3.6501	87.9152	0.602464	0.0408119	FALSE
163	G19	Sample 70		N2	FAM	UNKNOWN	FAM	NFQ-MGB	No Amp	Undetermined		0				FALSE	32228.9	TRUE	3	39					40.8103	0.996388	-3.6501	87.9152	0.602464	0.0408119	FALSE		Sample 70	Duo	Male	3.4	5.32396	100	150	1200	3	100	20	MADKV20
164	G20	Sample 70		N2	FAM	UNKNOWN	FAM	NFQ-MGB	No Amp	Undetermined		0				FALSE	32228.9	TRUE	3	39					40.8103	0.996388	-3.6501	87.9152	0.602464	0.0408119	FALSE
165	G21	Sample 70		N2	FAM	UNKNOWN	FAM	NFQ-MGB	No Amp	Undetermined		0				FALSE	32228.9	TRUE	3	39					40.8103	0.996388	-3.6501	87.9152	0.602464	0.0408119	FALSE
211	I19	Sample 71	1552.27	N2	FAM	UNKNOWN	FAM	NFQ-MGB	Amp	29.163	29.2317	0.9761	0.0681582	1487.31	63.9694	FALSE	32228.9	TRUE	3	20					40.8103	0.996388	-3.6501	87.9152	0.602464	0.0408119	FALSE		Sample 71	Lung	Male	1.7	0.988089	100	150	1200	3	100	45	MADKV20
212	I20	Sample 71	1424.38	N2	FAM	UNKNOWN	FAM	NFQ-MGB	Amp	29.2993	29.2317	0.984456	0.0681582	1487.31	63.9694	FALSE	32228.9	TRUE	3	21					40.8103	0.996388	-3.6501	87.9152	0.602464	0.0408119	FALSE
213	I21	Sample 71	1485.3	N2	FAM	UNKNOWN	FAM	NFQ-MGB	Amp	29.2329	29.2317	0.976735	0.0681582	1487.31	63.9694	FALSE	32228.9	TRUE	3	23					40.8103	0.996388	-3.6501	87.9152	0.602464	0.0408119	FALSE
235	J19	Sample 72		N2	FAM	UNKNOWN	FAM	NFQ-MGB	No Amp	Undetermined	38.9172	0				FALSE	32228.9	TRUE	3	39					40.8103	0.996388	-3.6501	87.9152	0.602464	0.0408119	FALSE		Sample 72	Hrt	Male	1.7	7.28332	100	150	1200	3	100	17	MADKV20
236	J20	Sample 72	3.30107	N2	FAM	UNKNOWN	FAM	NFQ-MGB	Inconclusive	38.9172	38.9172	0.100085				FALSE	32228.9	TRUE	3	31					40.8103	0.996388	-3.6501	87.9152	0.602464	0.0408119	FALSE
237	J21	Sample 72		N2	FAM	UNKNOWN	FAM	NFQ-MGB	No Amp	Undetermined	38.9172	0				FALSE	32228.9	TRUE	3	39					40.8103	0.996388	-3.6501	87.9152	0.602464	0.0408119	FALSE
259	K19	Sample 73	3.80839	N2	FAM	UNKNOWN	FAM	NFQ-MGB	Inconclusive	38.6905	38.6905	0.441294				FALSE	32228.9	TRUE	3	31					40.8103	0.996388	-3.6501	87.9152	0.602464	0.0408119	FALSE		Sample 73	Lvr	Male	1.7	0.5	100	150	1200	3	100	44	MADKV20
260	K20	Sample 73		N2	FAM	UNKNOWN	FAM	NFQ-MGB	No Amp	Undetermined	38.6905	0				FALSE	32228.9	TRUE	3	39					40.8103	0.996388	-3.6501	87.9152	0.602464	0.0408119	FALSE
261	K21	Sample 73		N2	FAM	UNKNOWN	FAM	NFQ-MGB	No Amp	Undetermined	38.6905	0				FALSE	32228.9	TRUE	3	39					40.8103	0.996388	-3.6501	87.9152	0.602464	0.0408119	FALSE
283	L19	Sample 74	8.87829	N2	FAM	UNKNOWN	FAM	NFQ-MGB	Amp	37.3488	37.4771	0.960152	0.296635	8.28077	1.46557	FALSE	32228.9	TRUE	3	30					40.8103	0.996388	-3.6501	87.9152	0.602464	0.0408119	FALSE		Sample 74	Spln	Male	1.7	0.548085	100	150	1200	3	100	26	MADKV20
284	L20	Sample 74	6.61083	N2	FAM	UNKNOWN	FAM	NFQ-MGB	Amp	37.8163	37.4771	0.945074	0.296635	8.28077	1.46557	FALSE	32228.9	TRUE	3	28					40.8103	0.996388	-3.6501	87.9152	0.602464	0.0408119	FALSE
285	L21	Sample 74	9.35319	N2	FAM	UNKNOWN	FAM	NFQ-MGB	Amp	37.2662	37.4771	0.92769	0.296635	8.28077	1.46557	FALSE	32228.9	TRUE	3	30					40.8103	0.996388	-3.6501	87.9152	0.602464	0.0408119	FALSE
307	M19	Sample 75		N2	FAM	UNKNOWN	FAM	NFQ-MGB	No Amp	Undetermined		0				FALSE	32228.9	TRUE	3	39					40.8103	0.996388	-3.6501	87.9152	0.602464	0.0408119	FALSE		Sample 75	Stom	Male	1.7	2.52573	100	150	1200	3	100	24	MADKV20
308	M20	Sample 75		N2	FAM	UNKNOWN	FAM	NFQ-MGB	No Amp	Undetermined		0				FALSE	32228.9	TRUE	3	39					40.8103	0.996388	-3.6501	87.9152	0.602464	0.0408119	FALSE
309	M21	Sample 75		N2	FAM	UNKNOWN	FAM	NFQ-MGB	No Amp	Undetermined		0				FALSE	32228.9	TRUE	3	39					40.8103	0.996388	-3.6501	87.9152	0.602464	0.0408119	FALSE
331	N19	Sample 76		N2	FAM	UNKNOWN	FAM	NFQ-MGB	No Amp	Undetermined		0				FALSE	32228.9	TRUE	3	39					40.8103	0.996388	-3.6501	87.9152	0.602464	0.0408119	FALSE		Sample 76	Kid	Male	1.7	1.27496	100	150	1200	3	100	70	MADKV20
332	N20	Sample 76		N2	FAM	UNKNOWN	FAM	NFQ-MGB	No Amp	Undetermined		0				FALSE	32228.9	TRUE	3	39					40.8103	0.996388	-3.6501	87.9152	0.602464	0.0408119	FALSE
333	N21	Sample 76		N2	FAM	UNKNOWN	FAM	NFQ-MGB	No Amp	Undetermined		0				FALSE	32228.9	TRUE	3	39					40.8103	0.996388	-3.6501	87.9152	0.602464	0.0408119	FALSE
355	O19	Sample 77		N2	FAM	UNKNOWN	FAM	NFQ-MGB	No Amp	Undetermined		0				FALSE	32228.9	TRUE	3	39					40.8103	0.996388	-3.6501	87.9152	0.602464	0.0408119	FALSE		Sample 77	Duo	Male	1.7	13.0472	100	150	1200	3	100	16	MADKV20
356	O20	Sample 77		N2	FAM	UNKNOWN	FAM	NFQ-MGB	No Amp	Undetermined		0				FALSE	32228.9	TRUE	3	39					40.8103	0.996388	-3.6501	87.9152	0.602464	0.0408119	FALSE
357	O21	Sample 77		N2	FAM	UNKNOWN	FAM	NFQ-MGB	No Amp	Undetermined		0				FALSE	32228.9	TRUE	3	39					40.8103	0.996388	-3.6501	87.9152	0.602464	0.0408119	FALSE
22	A22	Sample 78	2811.91	N2	FAM	UNKNOWN	FAM	NFQ-MGB	Amp	28.2211	28.2196	0.986851	0.0626052	2816	111.268	FALSE	32228.9	TRUE	3	21					40.8103	0.996388	-3.6501	87.9152	0.602464	0.0408119	FALSE		Sample 78	Lung	Male	2.7	1.46276	100	150	1200	3	100	39	MADKV20
23	A23	Sample 78	2706.83	N2	FAM	UNKNOWN	FAM	NFQ-MGB	Amp	28.2815	28.2196	0.982671	0.0626052	2816	111.268	FALSE	32228.9	TRUE	3	21					40.8103	0.996388	-3.6501	87.9152	0.602464	0.0408119	FALSE
24	A24	Sample 78	2929.25	N2	FAM	UNKNOWN	FAM	NFQ-MGB	Amp	28.1563	28.2196	0.969007	0.0626052	2816	111.268	FALSE	32228.9	TRUE	3	22					40.8103	0.996388	-3.6501	87.9152	0.602464	0.0408119	FALSE
46	B22	Sample 79		N2	FAM	UNKNOWN	FAM	NFQ-MGB	No Amp	Undetermined		0				FALSE	32228.9	TRUE	3	39					40.8103	0.996388	-3.6501	87.9152	0.602464	0.0408119	FALSE		Sample 79	Hrt	Male	2.7	6.55437	100	150	1200	3	100	19	MADKV20
47	B23	Sample 79		N2	FAM	UNKNOWN	FAM	NFQ-MGB	No Amp	Undetermined		0				FALSE	32228.9	TRUE	3	39					40.8103	0.996388	-3.6501	87.9152	0.602464	0.0408119	FALSE
48	B24	Sample 79		N2	FAM	UNKNOWN	FAM	NFQ-MGB	No Amp	Undetermined		0				FALSE	32228.9	TRUE	3	39					40.8103	0.996388	-3.6501	87.9152	0.602464	0.0408119	FALSE
70	C22	Sample 80		N2	FAM	UNKNOWN	FAM	NFQ-MGB	No Amp	Undetermined	38.4024	0				FALSE	32228.9	TRUE	3	39					40.8103	0.996388	-3.6501	87.9152	0.602464	0.0408119	FALSE		Sample 80	Lvr	Male	2.7	0.773117	100	150	1200	3	100	49	MADKV20
71	C23	Sample 80	4.56756	N2	FAM	UNKNOWN	FAM	NFQ-MGB	Inconclusive	38.4024	38.4024	0.799442				FALSE	32228.9	TRUE	3	31					40.8103	0.996388	-3.6501	87.9152	0.602464	0.0408119	FALSE
72	C24	Sample 80		N2	FAM	UNKNOWN	FAM	NFQ-MGB	No Amp	Undetermined	38.4024	0				FALSE	32228.9	TRUE	3	39					40.8103	0.996388	-3.6501	87.9152	0.602464	0.0408119	FALSE
94	D22	Sample 81	8.75868	N2	FAM	UNKNOWN	FAM	NFQ-MGB	Inconclusive	37.3703	37.3703	0.894432				FALSE	32228.9	TRUE	3	29					40.8103	0.996388	-3.6501	87.9152	0.602464	0.0408119	FALSE		Sample 81	Spln	Male	2.7	3.17153	100	150	1200	3	100	13	MADKV20
95	D23	Sample 81		N2	FAM	UNKNOWN	FAM	NFQ-MGB	No Amp	Undetermined	37.3703	0				FALSE	32228.9	TRUE	3	39					40.8103	0.996388	-3.6501	87.9152	0.602464	0.0408119	FALSE
96	D24	Sample 81		N2	FAM	UNKNOWN	FAM	NFQ-MGB	No Amp	Undetermined	37.3703	0				FALSE	32228.9	TRUE	3	39					40.8103	0.996388	-3.6501	87.9152	0.602464	0.0408119	FALSE
118	E22	Sample 82		N2	FAM	UNKNOWN	FAM	NFQ-MGB	No Amp	Undetermined		0				FALSE	32228.9	TRUE	3	39					40.8103	0.996388	-3.6501	87.9152	0.602464	0.0408119	FALSE		Sample 82	Stom	Male	2.7	4.11879	100	150	1200	3	100	13	MADKV20
119	E23	Sample 82		N2	FAM	UNKNOWN	FAM	NFQ-MGB	No Amp	Undetermined		0				FALSE	32228.9	TRUE	3	39					40.8103	0.996388	-3.6501	87.9152	0.602464	0.0408119	FALSE
120	E24	Sample 82		N2	FAM	UNKNOWN	FAM	NFQ-MGB	No Amp	Undetermined		0				FALSE	32228.9	TRUE	3	39					40.8103	0.996388	-3.6501	87.9152	0.602464	0.0408119	FALSE
142	F22	Sample 83		N2	FAM	UNKNOWN	FAM	NFQ-MGB	No Amp	Undetermined		0				FALSE	32228.9	TRUE	3	39					40.8103	0.996388	-3.6501	87.9152	0.602464	0.0408119	FALSE		Sample 83	Kid	Male	2.7	1.77179	100	150	1200	3	100	62	MADKV20
143	F23	Sample 83		N2	FAM	UNKNOWN	FAM	NFQ-MGB	No Amp	Undetermined		0				FALSE	32228.9	TRUE	3	39					40.8103	0.996388	-3.6501	87.9152	0.602464	0.0408119	FALSE
144	F24	Sample 83		N2	FAM	UNKNOWN	FAM	NFQ-MGB	No Amp	Undetermined		0				FALSE	32228.9	TRUE	3	39					40.8103	0.996388	-3.6501	87.9152	0.602464	0.0408119	FALSE
166	G22	Sample 84		N2	FAM	UNKNOWN	FAM	NFQ-MGB	No Amp	Undetermined		0				FALSE	32228.9	TRUE	3	39					40.8103	0.996388	-3.6501	87.9152	0.602464	0.0408119	FALSE		Sample 84	Duo	Male	2.7	3.00684	100	150	1200	3	100	10	MADKV20
167	G23	Sample 84		N2	FAM	UNKNOWN	FAM	NFQ-MGB	No Amp	Undetermined		0				FALSE	32228.9	TRUE	3	39					40.8103	0.996388	-3.6501	87.9152	0.602464	0.0408119	FALSE
168	G24	Sample 84		N2	FAM	UNKNOWN	FAM	NFQ-MGB	No Amp	Undetermined		0				FALSE	32228.9	TRUE	3	39					40.8103	0.996388	-3.6501	87.9152	0.602464	0.0408119	FALSE
214	I22	Sample 85	1059.5	N2	FAM	UNKNOWN	FAM	NFQ-MGB	Amp	29.7684	29.7947	0.981012	0.140124	1044.75	91.1483	FALSE	32228.9	TRUE	3	17					40.8103	0.996388	-3.6501	87.9152	0.602464	0.0408119	FALSE		Sample 85	Lung	Male	3.7	2.13817	100	150	1200	3	100	36	MADKV20
215	I23	Sample 85	1127.63	N2	FAM	UNKNOWN	FAM	NFQ-MGB	Amp	29.6696	29.7947	0.986313	0.140124	1044.75	91.1483	FALSE	32228.9	TRUE	3	20					40.8103	0.996388	-3.6501	87.9152	0.602464	0.0408119	FALSE
216	I24	Sample 85	947.133	N2	FAM	UNKNOWN	FAM	NFQ-MGB	Amp	29.9461	29.7947	0.984636	0.140124	1044.75	91.1483	FALSE	32228.9	TRUE	3	21					40.8103	0.996388	-3.6501	87.9152	0.602464	0.0408119	FALSE
238	J22	Sample 86	3.25408	N2	FAM	UNKNOWN	FAM	NFQ-MGB	Inconclusive	38.9399	38.9399	0.0711947				FALSE	32228.9	TRUE	3	29					40.8103	0.996388	-3.6501	87.9152	0.602464	0.0408119	FALSE		Sample 86	Hrt	Male	3.7	13	100	150	1200	3	100	16	MADKV20
239	J23	Sample 86		N2	FAM	UNKNOWN	FAM	NFQ-MGB	No Amp	Undetermined	38.9399	0				FALSE	32228.9	TRUE	3	32					40.8103	0.996388	-3.6501	87.9152	0.602464	0.0408119	FALSE
240	J24	Sample 86		N2	FAM	UNKNOWN	FAM	NFQ-MGB	No Amp	Undetermined	38.9399	0				FALSE	32228.9	TRUE	3	39					40.8103	0.996388	-3.6501	87.9152	0.602464	0.0408119	FALSE
262	K22	Sample 87		N2	FAM	UNKNOWN	FAM	NFQ-MGB	No Amp	Undetermined		0				FALSE	32228.9	TRUE	3	39					40.8103	0.996388	-3.6501	87.9152	0.602464	0.0408119	FALSE		Sample 87	Lvr	Male	3.7	1.00564	100	150	1200	3	100	37	MADKV20
263	K23	Sample 87		N2	FAM	UNKNOWN	FAM	NFQ-MGB	No Amp	Undetermined		0				FALSE	32228.9	TRUE	3	39					40.8103	0.996388	-3.6501	87.9152	0.602464	0.0408119	FALSE
264	K24	Sample 87		N2	FAM	UNKNOWN	FAM	NFQ-MGB	No Amp	Undetermined		0				FALSE	32228.9	TRUE	3	39					40.8103	0.996388	-3.6501	87.9152	0.602464	0.0408119	FALSE
286	L22	Sample 88		N2	FAM	UNKNOWN	FAM	NFQ-MGB	No Amp	Undetermined	39.1886	0				FALSE	32228.9	TRUE	3	39					40.8103	0.996388	-3.6501	87.9152	0.602464	0.0408119	FALSE		Sample 88	Spln	Male	3.7	0.842495	100	150	1200	3	100	27	MADKV20
287	L23	Sample 88		N2	FAM	UNKNOWN	FAM	NFQ-MGB	No Amp	Undetermined	39.1886	0				FALSE	32228.9	TRUE	3	39					40.8103	0.996388	-3.6501	87.9152	0.602464	0.0408119	FALSE
288	L24	Sample 88	2.78152	N2	FAM	UNKNOWN	FAM	NFQ-MGB	Inconclusive	39.1886	39.1886	0				FALSE	32228.9	TRUE	3	29					40.8103	0.996388	-3.6501	87.9152	0.602464	0.0408119	FALSE
310	M22	Sample 89		N2	FAM	UNKNOWN	FAM	NFQ-MGB	No Amp	Undetermined		0				FALSE	32228.9	TRUE	3	39					40.8103	0.996388	-3.6501	87.9152	0.602464	0.0408119	FALSE		Sample 89	Stom	Male	3.7	12.4992	100	150	1200	3	100	6	MADKV20
311	M23	Sample 89		N2	FAM	UNKNOWN	FAM	NFQ-MGB	No Amp	Undetermined		0				FALSE	32228.9	TRUE	3	39					40.8103	0.996388	-3.6501	87.9152	0.602464	0.0408119	FALSE
312	M24	Sample 89		N2	FAM	UNKNOWN	FAM	NFQ-MGB	No Amp	Undetermined		0				FALSE	32228.9	TRUE	3	39					40.8103	0.996388	-3.6501	87.9152	0.602464	0.0408119	FALSE
334	N22	Sample 90		N2	FAM	UNKNOWN	FAM	NFQ-MGB	No Amp	Undetermined		0				FALSE	32228.9	TRUE	3	39					40.8103	0.996388	-3.6501	87.9152	0.602464	0.0408119	FALSE		Sample 90	Kid	Male	3.7	1.07577	100	150	1200	3	100	73	MADKV20
335	N23	Sample 90		N2	FAM	UNKNOWN	FAM	NFQ-MGB	No Amp	Undetermined		0				FALSE	32228.9	TRUE	3	39					40.8103	0.996388	-3.6501	87.9152	0.602464	0.0408119	FALSE
336	N24	Sample 90		N2	FAM	UNKNOWN	FAM	NFQ-MGB	No Amp	Undetermined		0				FALSE	32228.9	TRUE	3	39					40.8103	0.996388	-3.6501	87.9152	0.602464	0.0408119	FALSE
358	O22	Sample 91		N2	FAM	UNKNOWN	FAM	NFQ-MGB	No Amp	Undetermined		0				FALSE	32228.9	TRUE	3	39					40.8103	0.996388	-3.6501	87.9152	0.602464	0.0408119	FALSE		Sample 91	Duo	Male	3.7	4.51692	100	150	1200	3	100	11	MADKV20
359	O23	Sample 91		N2	FAM	UNKNOWN	FAM	NFQ-MGB	No Amp	Undetermined		0				FALSE	32228.9	TRUE	3	39					40.8103	0.996388	-3.6501	87.9152	0.602464	0.0408119	FALSE
360	O24	Sample 91		N2	FAM	UNKNOWN	FAM	NFQ-MGB	No Amp	Undetermined		0				FALSE	32228.9	TRUE	3	39					40.8103	0.996388	-3.6501	87.9152	0.602464	0.0408119	FALSE
289	M1			N2	FAM	NTC	FAM	NFQ-MGB	No Amp	Undetermined		0				FALSE	32228.9	TRUE	3	39					40.8103	0.996388	-3.6501	87.9152	0.602464	0.0408119	FALSE
290	M2			N2	FAM	NTC	FAM	NFQ-MGB	No Amp	Undetermined		0				FALSE	32228.9	TRUE	3	39					40.8103	0.996388	-3.6501	87.9152	0.602464	0.0408119	FALSE
291	M3			N2	FAM	NTC	FAM	NFQ-MGB	No Amp	Undetermined		0				FALSE	32228.9	TRUE	3	39					40.8103	0.996388	-3.6501	87.9152	0.602464	0.0408119	FALSE
Block Type	384-Well Block
Calibration Background is expired	No
Calibration Background performed on	01-27-2021
Calibration Pure Dye ABY is expired	No
Calibration Pure Dye ABY performed on	01-27-2021
Calibration Pure Dye CY5 is expired	No
Calibration Pure Dye CY5 performed on	01-27-2021
Calibration Pure Dye FAM is expired	No
Calibration Pure Dye FAM performed on	01-27-2021
Calibration Pure Dye JUN is expired	No
Calibration Pure Dye JUN performed on	01-27-2021
Calibration Pure Dye MUSTANG PURPLE is expired	No
Calibration Pure Dye MUSTANG PURPLE performed on	01-27-2021
Calibration Pure Dye NED is expired	No
Calibration Pure Dye NED performed on	01-27-2021
Calibration Pure Dye ROX is expired	No
Calibration Pure Dye ROX performed on	01-27-2021
Calibration Pure Dye SYBR is expired	No
Calibration Pure Dye SYBR performed on	01-27-2021
Calibration Pure Dye TAMRA is expired	No
Calibration Pure Dye TAMRA performed on	01-27-2021
Calibration Pure Dye VIC is expired	No
Calibration Pure Dye VIC performed on	01-27-2021
Calibration ROI is expired	No
Calibration ROI performed on	01-27-2021
Calibration Uniformity is expired	No
Calibration Uniformity performed on	01-27-2021
Chemistry	TAQMAN
Date Created	2022-01-05 12:43:22 PM PST
Experiment Barcode
Experiment Comment
Experiment File Name	X:\TheLounge\Personal_Sharing Folders\Megan K\QuantStudio5\MADKV20M21M N2 TITER.eds
Experiment Name	MADKV20M21M N2 TITER
Experiment Run End Time	2022-01-04 15:53:22 PM PST
Experiment Type	Standard Curve
Instrument Name	Gale-Lab-QuantStudio
Instrument Serial Number	272532607
Instrument Type	QuantStudio™ 5 System
Passive Reference	ROX
Post-read Stage/Step
Pre-read Stage/Step
Quantification Cycle Method	Ct
Signal Smoothing On	true
Stage where Melt Analysis is performed	Stage3
Stage/ Cycle where Ct Analysis is performed	Stage2, Step2
User Name
Well	Well Position	Omit	Sample Name	Target Name	Task	Reporter	Quencher	CT	Ct Mean	Ct SD	Quantity	Quantity Mean	Quantity SD	Y-Intercept	R(superscript 2)	Slope	Efficiency	Automatic Ct Threshold	Ct Threshold	Automatic Baseline	Baseline Start	Baseline End	Amp Status	Comments	Cq Conf	CQCONF	HIGHSD	EXPFAIL	NOAMP	Tm1	Tm2	Tm3	Tm4	Sample	Tissue	Gender	Label	uL RNA for 200ng	uL cDNA	uL Sample input uL	Trizol/Chloroform total Volume	uL cDNA/well	uL RNA Eluted	Tissue weight mg	MADKV20
1	A1	FALSE		N2	STANDARD	FAM	NFQ-MGB	10.4277	10.5132	0.0781362	150000000			38.2349	0.9989	-3.4281	95.7523	FALSE	0.1	TRUE	3	7	Amp		0.729021	Y	N	N	N
2	A2	FALSE		N2	STANDARD	FAM	NFQ-MGB	10.5808	10.5132	0.0781362	150000000			38.2349	0.9989	-3.4281	95.7523	FALSE	0.1	TRUE	3	7	Amp		0.78272	Y	N	N	N
3	A3	FALSE		N2	STANDARD	FAM	NFQ-MGB	10.5312	10.5132	0.0781362	150000000			38.2349	0.9989	-3.4281	95.7523	FALSE	0.1	TRUE	3	7	Amp		0.764159	Y	N	N	N
25	B1	FALSE		N2	STANDARD	FAM	NFQ-MGB	13.6063	13.3944	0.224511	15000000			38.2349	0.9989	-3.4281	95.7523	FALSE	0.1	TRUE	3	10	Amp		0.832681	N	N	N	N
26	B2	FALSE		N2	STANDARD	FAM	NFQ-MGB	13.1591	13.3944	0.224511	15000000			38.2349	0.9989	-3.4281	95.7523	FALSE	0.1	TRUE	3	8	Amp		0.792395	Y	N	N	N
27	B3	FALSE		N2	STANDARD	FAM	NFQ-MGB	13.4178	13.3944	0.224511	15000000			38.2349	0.9989	-3.4281	95.7523	FALSE	0.1	TRUE	3	9	Amp		0.819979	N	N	N	N
49	C1	FALSE		N2	STANDARD	FAM	NFQ-MGB	17.0161	17.0004	0.107922	1500000			38.2349	0.9989	-3.4281	95.7523	FALSE	0.1	TRUE	3	13	Amp		0.889539	N	N	N	N
50	C2	FALSE		N2	STANDARD	FAM	NFQ-MGB	16.8855	17.0004	0.107922	1500000			38.2349	0.9989	-3.4281	95.7523	FALSE	0.1	TRUE	3	13	Amp		0.880903	N	N	N	N
51	C3	FALSE		N2	STANDARD	FAM	NFQ-MGB	17.0996	17.0004	0.107922	1500000			38.2349	0.9989	-3.4281	95.7523	FALSE	0.1	TRUE	3	13	Amp		0.910694	N	N	N	N
73	D1	FALSE		N2	STANDARD	FAM	NFQ-MGB	20.4738	20.4532	0.208856	150000			38.2349	0.9989	-3.4281	95.7523	FALSE	0.1	TRUE	3	16	Amp		0.96983	N	N	N	N
74	D2	FALSE		N2	STANDARD	FAM	NFQ-MGB	20.2349	20.4532	0.208856	150000			38.2349	0.9989	-3.4281	95.7523	FALSE	0.1	TRUE	3	16	Amp		0.937929	N	N	N	N
75	D3	FALSE		N2	STANDARD	FAM	NFQ-MGB	20.6511	20.4532	0.208856	150000			38.2349	0.9989	-3.4281	95.7523	FALSE	0.1	TRUE	3	16	Amp		0.978552	N	N	N	N
97	E1	FALSE		N2	STANDARD	FAM	NFQ-MGB	23.9885	23.8771	0.11144	15000			38.2349	0.9989	-3.4281	95.7523	FALSE	0.1	TRUE	3	20	Amp		0.980126	N	N	N	N
98	E2	FALSE		N2	STANDARD	FAM	NFQ-MGB	23.8772	23.8771	0.11144	15000			38.2349	0.9989	-3.4281	95.7523	FALSE	0.1	TRUE	3	20	Amp		0.986567	N	N	N	N
99	E3	FALSE		N2	STANDARD	FAM	NFQ-MGB	23.7656	23.8771	0.11144	15000			38.2349	0.9989	-3.4281	95.7523	FALSE	0.1	TRUE	3	19	Amp		0.989424	N	N	N	N
121	F1	FALSE		N2	STANDARD	FAM	NFQ-MGB	27.2899	27.2739	0.12577	1500			38.2349	0.9989	-3.4281	95.7523	FALSE	0.1	TRUE	3	23	Amp		0.982049	N	N	N	N
122	F2	FALSE		N2	STANDARD	FAM	NFQ-MGB	27.1408	27.2739	0.12577	1500			38.2349	0.9989	-3.4281	95.7523	FALSE	0.1	TRUE	3	23	Amp		0.984737	N	N	N	N
123	F3	FALSE		N2	STANDARD	FAM	NFQ-MGB	27.3908	27.2739	0.12577	1500			38.2349	0.9989	-3.4281	95.7523	FALSE	0.1	TRUE	3	24	Amp		0.972956	N	N	N	N
145	G1	FALSE		N2	STANDARD	FAM	NFQ-MGB	30.8498	30.7868	0.0546301	150			38.2349	0.9989	-3.4281	95.7523	FALSE	0.1	TRUE	3	25	Amp		0.973251	N	N	N	N
146	G2	FALSE		N2	STANDARD	FAM	NFQ-MGB	30.7548	30.7868	0.0546301	150			38.2349	0.9989	-3.4281	95.7523	FALSE	0.1	TRUE	3	27	Amp		0.978385	N	N	N	N
147	G3	FALSE		N2	STANDARD	FAM	NFQ-MGB	30.7556	30.7868	0.0546301	150			38.2349	0.9989	-3.4281	95.7523	FALSE	0.1	TRUE	3	27	Amp		0.982572	N	N	N	N
169	H1	FALSE		N2	STANDARD	FAM	NFQ-MGB	34.855	34.2335	0.579237	15			38.2349	0.9989	-3.4281	95.7523	FALSE	0.1	TRUE	3	30	Amp		0.967742	N	Y	N	N
170	H2	FALSE		N2	STANDARD	FAM	NFQ-MGB	33.7087	34.2335	0.579237	15			38.2349	0.9989	-3.4281	95.7523	FALSE	0.1	TRUE	3	29	Amp		0.96441		Y	N	N
171	H3	FALSE		N2	STANDARD	FAM	NFQ-MGB	34.1368	34.2335	0.579237	15			38.2349	0.9989	-3.4281	95.7523	FALSE	0.1	TRUE	3	30	Amp		0.959908	N	Y	N	N
193	I1	FALSE		N2	STANDARD	FAM	NFQ-MGB	35.6568	35.4983	0.224151	7.5			38.2349	0.9989	-3.4281	95.7523	FALSE	0.1	TRUE	3	31	Amp		0.945929	N	N	N	N
194	I2	FALSE		N2	STANDARD	FAM	NFQ-MGB	35.3398	35.4983	0.224151	7.5			38.2349	0.9989	-3.4281	95.7523	FALSE	0.1	TRUE	3	30	Amp		0.963443	N	N	N	N
195	I3	FALSE		N2	STANDARD	FAM	NFQ-MGB	Undetermined	35.4983	0.224151	7.5			38.2349	0.9989	-3.4281	95.7523	FALSE	0.1	TRUE	3	39	No Amp		0	Y	N	Y	Y
217	J1	FALSE		N2	STANDARD	FAM	NFQ-MGB	35.936	36.4133	0.432692	3.75			38.2349	0.9989	-3.4281	95.7523	FALSE	0.1	TRUE	3	31	Amp		0.933263	N	N	N	N
218	J2	FALSE		N2	STANDARD	FAM	NFQ-MGB	36.524	36.4133	0.432692	3.75			38.2349	0.9989	-3.4281	95.7523	FALSE	0.1	TRUE	3	32	Inconclusive		0.953557	N	N	N	N
219	J3	FALSE		N2	STANDARD	FAM	NFQ-MGB	36.7799	36.4133	0.432692	3.75			38.2349	0.9989	-3.4281	95.7523	FALSE	0.1	TRUE	3	32	Inconclusive		0.934489	N	N	N	N
241	K1	FALSE		N2	STANDARD	FAM	NFQ-MGB	37.248	36.9066	0.302727	1.875			38.2349	0.9989	-3.4281	95.7523	FALSE	0.1	TRUE	3	32	Inconclusive		0.918899	N	N	N	N
242	K2	FALSE		N2	STANDARD	FAM	NFQ-MGB	36.6709	36.9066	0.302727	1.875			38.2349	0.9989	-3.4281	95.7523	FALSE	0.1	TRUE	3	33	Inconclusive		0.949001	N	N	N	N
243	K3	FALSE		N2	STANDARD	FAM	NFQ-MGB	36.8008	36.9066	0.302727	1.875			38.2349	0.9989	-3.4281	95.7523	FALSE	0.1	TRUE	3	33	Inconclusive		0.930219	N	N	N	N
265	L1	FALSE		N2	STANDARD	FAM	NFQ-MGB	38.8545	38.8545		0.9375			38.2349	0.9989	-3.4281	95.7523	FALSE	0.1	TRUE	3	35	No Amp		0.16125	Y	N	N	N
266	L2	FALSE		N2	STANDARD	FAM	NFQ-MGB	Undetermined	38.8545		0.9375			38.2349	0.9989	-3.4281	95.7523	FALSE	0.1	TRUE	3	39	No Amp		0	Y	N	Y	Y
267	L3	FALSE		N2	STANDARD	FAM	NFQ-MGB	Undetermined	38.8545		0.9375			38.2349	0.9989	-3.4281	95.7523	FALSE	0.1	TRUE	3	39	No Amp		0	Y	N	Y	Y
7	A7	FALSE	Sample 1	N2	UNKNOWN	FAM	NFQ-MGB	Undetermined						38.2349	0.9989	-3.4281	95.7523	FALSE	0.1	TRUE	3	4	No Amp		0	Y	N	N	N					Sample 1	Lung	Male	1.M	5.84795	100	150	1200	3	100	26	MADKV20
8	A8	FALSE	Sample 1	N2	UNKNOWN	FAM	NFQ-MGB	Undetermined						38.2349	0.9989	-3.4281	95.7523	FALSE	0.1	TRUE	3	39	No Amp		0	Y	N	Y	Y					Sample 1
9	A9	FALSE	Sample 1	N2	UNKNOWN	FAM	NFQ-MGB	Undetermined						38.2349	0.9989	-3.4281	95.7523	FALSE	0.1	TRUE	3	15	No Amp		0	Y	N	N	Y					Sample 1
31	B7	FALSE	Sample 2	N2	UNKNOWN	FAM	NFQ-MGB	Undetermined						38.2349	0.9989	-3.4281	95.7523	FALSE	0.1	TRUE	3	39	No Amp		0	Y	N	Y	Y					Sample 2	Lung	Male	2.M	3.003	100	150	1200	3	100	29	MADKV20
32	B8	FALSE	Sample 2	N2	UNKNOWN	FAM	NFQ-MGB	Undetermined						38.2349	0.9989	-3.4281	95.7523	FALSE	0.1	TRUE	3	5	No Amp		0	Y	N	N	Y					Sample 2
33	B9	FALSE	Sample 2	N2	UNKNOWN	FAM	NFQ-MGB	Undetermined						38.2349	0.9989	-3.4281	95.7523	FALSE	0.1	TRUE	3	39	No Amp		0	Y	N	Y	Y					Sample 2
55	C7	FALSE	Sample 3	N2	UNKNOWN	FAM	NFQ-MGB	Undetermined						38.2349	0.9989	-3.4281	95.7523	FALSE	0.1	TRUE	3	12	No Amp		0	Y	N	N	Y					Sample 3	Lung	Male	3.M	2	100	150	1200	3	100	50	MADKV20
56	C8	FALSE	Sample 3	N2	UNKNOWN	FAM	NFQ-MGB	Undetermined						38.2349	0.9989	-3.4281	95.7523	FALSE	0.1	TRUE	3	39	No Amp		0	Y	N	Y	Y					Sample 3
57	C9	FALSE	Sample 3	N2	UNKNOWN	FAM	NFQ-MGB	Undetermined						38.2349	0.9989	-3.4281	95.7523	FALSE	0.1	TRUE	3	39	No Amp		0	Y	N	Y	Y					Sample 3
79	D7	FALSE	Sample 4	N2	UNKNOWN	FAM	NFQ-MGB	13.6765	13.6595	0.101175	14582925	14773691	1.01172e+06	38.2349	0.9989	-3.4281	95.7523	FALSE	0.1	TRUE	3	10	Amp		0.834721	N	N	N	N					Sample 4	Lung	Male	1.2	2.10526	100	150	1200	3	100	45	MADKV20
80	D8	FALSE	Sample 4	N2	UNKNOWN	FAM	NFQ-MGB	13.751	13.6595	0.101175	13870928	14773691	1.01172e+06	38.2349	0.9989	-3.4281	95.7523	FALSE	0.1	TRUE	3	10	Amp		0.838343	N	N	N	N					Sample 4
81	D9	FALSE	Sample 4	N2	UNKNOWN	FAM	NFQ-MGB	13.5509	13.6595	0.101175	15867218	14773691	1.01172e+06	38.2349	0.9989	-3.4281	95.7523	FALSE	0.1	TRUE	3	9	Amp		0.831877	N	N	N	N					Sample 4
103	E7	FALSE	Sample 5	N2	UNKNOWN	FAM	NFQ-MGB	14.8664	14.8093	0.098	6557532	6.82383e+06	457370	38.2349	0.9989	-3.4281	95.7523	FALSE	0.1	TRUE	3	11	Amp		0.869921	N	N	N	N					Sample 5	Lung	Male	2.2	2.06186	100	150	1200	3	100	43	MADKV20
104	E8	FALSE	Sample 5	N2	UNKNOWN	FAM	NFQ-MGB	14.8654	14.8093	0.098	6562003	6.82383e+06	457370	38.2349	0.9989	-3.4281	95.7523	FALSE	0.1	TRUE	3	11	Amp		0.875129	N	N	N	N					Sample 5
105	E9	FALSE	Sample 5	N2	UNKNOWN	FAM	NFQ-MGB	14.6962	14.8093	0.098	7351947	6.82383e+06	457370	38.2349	0.9989	-3.4281	95.7523	FALSE	0.1	TRUE	3	10	Amp		0.847387	N	N	N	N					Sample 5
127	F7	FALSE	Sample 6	N2	UNKNOWN	FAM	NFQ-MGB	14.378	14.4207	0.163793	9103875	8881591	955956	38.2349	0.9989	-3.4281	95.7523	FALSE	0.1	TRUE	3	10	Amp		0.844556	N	N	N	N					Sample 6	Lung	Male	3.2	4.42478	100	150	1200	3	100	13	MADKV20
128	F8	FALSE	Sample 6	N2	UNKNOWN	FAM	NFQ-MGB	14.2825	14.4207	0.163793	9706821	8881591	955956	38.2349	0.9989	-3.4281	95.7523	FALSE	0.1	TRUE	3	9	Amp		0.837736	N	N	N	N					Sample 6
129	F9	FALSE	Sample 6	N2	UNKNOWN	FAM	NFQ-MGB	14.6016	14.4207	0.163793	7834075	8881591	955956	38.2349	0.9989	-3.4281	95.7523	FALSE	0.1	TRUE	3	11	Amp		0.872101	N	N	N	N					Sample 6
151	G7	FALSE	Sample 7	N2	UNKNOWN	FAM	NFQ-MGB	19.7853	19.8063	0.0540439	240923	237650	8547.5	38.2349	0.9989	-3.4281	95.7523	FALSE	0.1	TRUE	3	14	Amp		0.950329	N	N	N	N					Sample 7	Lung	Male	1.4	5.37634	100	150	1200	3	100	20	MADKV20
152	G8	FALSE	Sample 7	N2	UNKNOWN	FAM	NFQ-MGB	19.7659	19.8063	0.0540439	244077	237650	8547.5	38.2349	0.9989	-3.4281	95.7523	FALSE	0.1	TRUE	3	15	Amp		0.962866	N	N	N	N					Sample 7
153	G9	FALSE	Sample 7	N2	UNKNOWN	FAM	NFQ-MGB	19.8677	19.8063	0.0540439	227950	237650	8547.5	38.2349	0.9989	-3.4281	95.7523	FALSE	0.1	TRUE	3	16	Amp		0.979116	N	N	N	N					Sample 7
175	H7	FALSE	Sample 8	N2	UNKNOWN	FAM	NFQ-MGB	22.2713	22.3274	0.0993441	45362.7	43747.9	2860.93	38.2349	0.9989	-3.4281	95.7523	FALSE	0.1	TRUE	3	18	Amp		0.986312	N	N	N	N					Sample 8	Lung	Male	2.4	3.81679	100	150	1200	3	100	15	MADKV20
176	H8	FALSE	Sample 8	N2	UNKNOWN	FAM	NFQ-MGB	22.2689	22.3274	0.0993441	45436.4	43747.9	2860.93	38.2349	0.9989	-3.4281	95.7523	FALSE	0.1	TRUE	3	17	Amp		0.985011	N	N	N	N					Sample 8
177	H9	FALSE	Sample 8	N2	UNKNOWN	FAM	NFQ-MGB	22.4421	22.3274	0.0993441	40444.7	43747.9	2860.93	38.2349	0.9989	-3.4281	95.7523	FALSE	0.1	TRUE	3	18	Amp		0.984549	N	N	N	N					Sample 8
199	I7	FALSE	Sample 9	N2	UNKNOWN	FAM	NFQ-MGB	21.1047	21.1342	0.0256841	99313.9	97371	1687.84	38.2349	0.9989	-3.4281	95.7523	FALSE	0.1	TRUE	3	17	Amp		0.982671	N	N	N	N					Sample 9	Lung	Male	3.4	5.93472	100	150	1200	3	100	31	MADKV20
200	I8	FALSE	Sample 9	N2	UNKNOWN	FAM	NFQ-MGB	21.1511	21.1342	0.0256841	96266.3	97371	1687.84	38.2349	0.9989	-3.4281	95.7523	FALSE	0.1	TRUE	3	17	Amp		0.98815	N	N	N	N					Sample 9
201	I9	FALSE	Sample 9	N2	UNKNOWN	FAM	NFQ-MGB	21.1469	21.1342	0.0256841	96532.9	97371	1687.84	38.2349	0.9989	-3.4281	95.7523	FALSE	0.1	TRUE	3	17	Amp		0.980185	N	N	N	N					Sample 9
223	J7	FALSE	Sample 10	N2	UNKNOWN	FAM	NFQ-MGB	28.9461	28.8191	0.119681	512.413	559.208	44.5584	38.2349	0.9989	-3.4281	95.7523	FALSE	0.1	TRUE	3	25	Amp		0.987768	N	N	N	N					Sample 10	Lung	Male	1.7	1.07527	100	150	1200	3	100	45	MADKV20
224	J8	FALSE	Sample 10	N2	UNKNOWN	FAM	NFQ-MGB	28.7083	28.8191	0.119681	601.129	559.208	44.5584	38.2349	0.9989	-3.4281	95.7523	FALSE	0.1	TRUE	3	24	Amp		0.979964	N	N	N	N					Sample 10
225	J9	FALSE	Sample 10	N2	UNKNOWN	FAM	NFQ-MGB	28.803	28.8191	0.119681	564.083	559.208	44.5584	38.2349	0.9989	-3.4281	95.7523	FALSE	0.1	TRUE	3	24	Amp		0.9851	N	N	N	N					Sample 10
247	K7	FALSE	Sample 11	N2	UNKNOWN	FAM	NFQ-MGB	28.075	27.9391	0.120078	919.817	1009.93	79.8043	38.2349	0.9989	-3.4281	95.7523	FALSE	0.1	TRUE	3	24	Amp		0.983192	N	N	N	N					Sample 11	Lung	Male	2.7	2.89855	100	150	1200	3	100	39	MADKV20
248	K8	FALSE	Sample 11	N2	UNKNOWN	FAM	NFQ-MGB	27.8946	27.9391	0.120078	1038.3	1009.93	79.8043	38.2349	0.9989	-3.4281	95.7523	FALSE	0.1	TRUE	3	24	Amp		0.983605	N	N	N	N					Sample 11
249	K9	FALSE	Sample 11	N2	UNKNOWN	FAM	NFQ-MGB	27.8475	27.9391	0.120078	1071.67	1009.93	79.8043	38.2349	0.9989	-3.4281	95.7523	FALSE	0.1	TRUE	3	23	Amp		0.98851	N	N	N	N					Sample 11
271	L7	FALSE	Sample 12	N2	UNKNOWN	FAM	NFQ-MGB	28.9195	29.0231	0.236541	521.645	490.545	74.3698	38.2349	0.9989	-3.4281	95.7523	FALSE	0.1	TRUE	3	24	Amp		0.976191	N	N	N	N					Sample 12	Lung	Male	3.7	2.38095	100	150	1200	3	100	36	MADKV20
272	L8	FALSE	Sample 12	N2	UNKNOWN	FAM	NFQ-MGB	28.8561	29.0231	0.236541	544.315	490.545	74.3698	38.2349	0.9989	-3.4281	95.7523	FALSE	0.1	TRUE	3	24	Amp		0.984183	N	N	N	N					Sample 12
273	L9	FALSE	Sample 12	N2	UNKNOWN	FAM	NFQ-MGB	29.2938	29.0231	0.236541	405.673	490.545	74.3698	38.2349	0.9989	-3.4281	95.7523	FALSE	0.1	TRUE	3	25	Amp		0.974072	N	N	N	N					Sample 12
289	M1	FALSE		N2	NTC	FAM	NFQ-MGB	Undetermined						38.2349	0.9989	-3.4281	95.7523	FALSE	0.1	TRUE	3	34	No Amp		0	N	N	N	N
290	M2	FALSE		N2	NTC	FAM	NFQ-MGB	Undetermined						38.2349	0.9989	-3.4281	95.7523	FALSE	0.1	TRUE	3	39	No Amp		0	N	N	N	N
291	M3	FALSE		N2	NTC	FAM	NFQ-MGB	Undetermined						38.2349	0.9989	-3.4281	95.7523	FALSE	0.1	TRUE	3	39	No Amp		0	N	N	N	N
File Name	X:\TheLounge\Personal_Sharing Folders\Megan K\QuantStudio5\MADKV20F 21f lung N2 TITER.eds
Comment
Operator	DEFAULT
Barcode
Instrument Type	QuantStudio™ 5 System
Block Type	384-Well Block
Instrument Name	Gale-Lab-QuantStudio
Instrument Serial Number	272532607
Heated Cover Serial Number
Block Serial Number	20525021
Run Start Date/Time	2021-12-22 12:03:30 PM PST
Run End Date/Time	2021-12-22 01:37:48 PM PST
Run Duration	94 minutes 17 seconds
Sample Volume	10.0
Cover Temperature	105.0
Passive Reference	NONE
PCR Stage/Step Number	Stage 2 Step 2
Quantification Cycle Method	CT
Analysis Date/Time	2022-01-03 04:21:58 PM PST
Software Name and Version	Design & Analysis Software v2.5.1
Plugin Name and Version	Primary Analysis v1.6.0, Standard Curve v1.5.1
Exported On	2022-01-03 04:22:21 PM PST
Well	Well Position	Sample	Quantity	Target	Dye	Task	Reporter	Quencher	Amp Status	Cq	Cq Mean	Cq Confidence	Cq SD	Quantity Mean	Quantity SD	Auto Threshold	Threshold	Auto Baseline	Baseline Start	Baseline End	Tm1	Tm2	Tm3	Tm4	Y-Intercept	R2	Slope	Efficiency	Standard Deviation	Standard Error	Omit		Sample	Tissue	Gender	Label	uL RNA for 200ng	uL cDNA	uL Sample input uL	Trizol/Chloroform total Volume	uL cDNA/well	uL RNA Eluted	Tissue weight mg	AGE	MADKV20
265	L1	0.9375	0.9375	N2	FAM	STANDARD	FAM	NFQ-MGB	Inconclusive	38.3247	38.3247	0.757452				FALSE	28536.5	TRUE	3	30					39.7084	0.994257	-3.5331	91.8837	0.734267	0.0507447	FALSE
266	L2	0.9375	0.9375	N2	FAM	STANDARD	FAM	NFQ-MGB	No Amp	Undetermined	38.3247	0				FALSE	28536.5	TRUE	3	39					39.7084	0.994257	-3.5331	91.8837	0.734267	0.0507447	FALSE
267	L3	0.9375	0.9375	N2	FAM	STANDARD	FAM	NFQ-MGB	No Amp	Undetermined	38.3247	0				FALSE	28536.5	TRUE	3	39					39.7084	0.994257	-3.5331	91.8837	0.734267	0.0507447	FALSE
241	K1	1.875	1.875	N2	FAM	STANDARD	FAM	NFQ-MGB	No Amp	Undetermined	37.2655	0				FALSE	28536.5	TRUE	3	39					39.7084	0.994257	-3.5331	91.8837	0.734267	0.0507447	FALSE
242	K2	1.875	1.875	N2	FAM	STANDARD	FAM	NFQ-MGB	No Amp	Undetermined	37.2655	0				FALSE	28536.5	TRUE	3	39					39.7084	0.994257	-3.5331	91.8837	0.734267	0.0507447	FALSE
243	K3	1.875	1.875	N2	FAM	STANDARD	FAM	NFQ-MGB	Amp	37.2655	37.2655	0.94074				FALSE	28536.5	TRUE	3	31					39.7084	0.994257	-3.5331	91.8837	0.734267	0.0507447	FALSE
217	J1	3.75	3.75	N2	FAM	STANDARD	FAM	NFQ-MGB	Amp	36.4626	36.6336	0.953691	0.241827			FALSE	28536.5	TRUE	3	31					39.7084	0.994257	-3.5331	91.8837	0.734267	0.0507447	FALSE
218	J2	3.75	3.75	N2	FAM	STANDARD	FAM	NFQ-MGB	No Amp	Undetermined	36.6336	0	0.241827			FALSE	28536.5	TRUE	3	39					39.7084	0.994257	-3.5331	91.8837	0.734267	0.0507447	FALSE
219	J3	3.75	3.75	N2	FAM	STANDARD	FAM	NFQ-MGB	Amp	36.8046	36.6336	0.957618	0.241827			FALSE	28536.5	TRUE	3	27					39.7084	0.994257	-3.5331	91.8837	0.734267	0.0507447	FALSE
194	I2	7.5	7.5	N2	FAM	STANDARD	FAM	NFQ-MGB	Inconclusive	37.6049	37.2638	0.919427	0.482295			FALSE	28536.5	TRUE	3	29					39.7084	0.994257	-3.5331	91.8837	0.734267	0.0507447	FALSE
195	I3	7.5	7.5	N2	FAM	STANDARD	FAM	NFQ-MGB	Amp	36.9228	37.2638	0.95104	0.482295			FALSE	28536.5	TRUE	3	28					39.7084	0.994257	-3.5331	91.8837	0.734267	0.0507447	FALSE
169	H1	15.0	15	N2	FAM	STANDARD	FAM	NFQ-MGB	Amp	36.3874	35.9624	0.958155	1.05452			FALSE	28536.5	TRUE	3	29					39.7084	0.994257	-3.5331	91.8837	0.734267	0.0507447	FALSE
170	H2	15.0	15	N2	FAM	STANDARD	FAM	NFQ-MGB	Amp	36.738	35.9624	0.971418	1.05452			FALSE	28536.5	TRUE	3	27					39.7084	0.994257	-3.5331	91.8837	0.734267	0.0507447	FALSE
171	H3	15.0	15	N2	FAM	STANDARD	FAM	NFQ-MGB	Amp	34.7617	35.9624	0.963515	1.05452			FALSE	28536.5	TRUE	3	29					39.7084	0.994257	-3.5331	91.8837	0.734267	0.0507447	FALSE
145	G1	150.0	150	N2	FAM	STANDARD	FAM	NFQ-MGB	Amp	32.7282	32.3414	0.975898	0.39533			FALSE	28536.5	TRUE	3	27					39.7084	0.994257	-3.5331	91.8837	0.734267	0.0507447	FALSE
146	G2	150.0	150	N2	FAM	STANDARD	FAM	NFQ-MGB	Amp	32.3581	32.3414	0.977119	0.39533			FALSE	28536.5	TRUE	3	24					39.7084	0.994257	-3.5331	91.8837	0.734267	0.0507447	FALSE
147	G3	150.0	150	N2	FAM	STANDARD	FAM	NFQ-MGB	Amp	31.938	32.3414	0.982551	0.39533			FALSE	28536.5	TRUE	3	27					39.7084	0.994257	-3.5331	91.8837	0.734267	0.0507447	FALSE
121	F1	1500.0	1500	N2	FAM	STANDARD	FAM	NFQ-MGB	Amp	28.8795	28.8326	0.98159	0.12192			FALSE	28536.5	TRUE	3	21					39.7084	0.994257	-3.5331	91.8837	0.734267	0.0507447	FALSE
122	F2	1500.0	1500	N2	FAM	STANDARD	FAM	NFQ-MGB	Amp	28.9241	28.8326	0.977848	0.12192			FALSE	28536.5	TRUE	3	20					39.7084	0.994257	-3.5331	91.8837	0.734267	0.0507447	FALSE
123	F3	1500.0	1500	N2	FAM	STANDARD	FAM	NFQ-MGB	Amp	28.6942	28.8326	0.973469	0.12192			FALSE	28536.5	TRUE	3	21					39.7084	0.994257	-3.5331	91.8837	0.734267	0.0507447	FALSE
97	E1	15000.0	15000	N2	FAM	STANDARD	FAM	NFQ-MGB	Amp	25.7749	25.576	0.978978	0.241873			FALSE	28536.5	TRUE	3	20					39.7084	0.994257	-3.5331	91.8837	0.734267	0.0507447	FALSE
98	E2	15000.0	15000	N2	FAM	STANDARD	FAM	NFQ-MGB	Amp	25.6464	25.576	0.982591	0.241873			FALSE	28536.5	TRUE	3	16					39.7084	0.994257	-3.5331	91.8837	0.734267	0.0507447	FALSE
99	E3	15000.0	15000	N2	FAM	STANDARD	FAM	NFQ-MGB	Amp	25.3068	25.576	0.986266	0.241873			FALSE	28536.5	TRUE	3	16					39.7084	0.994257	-3.5331	91.8837	0.734267	0.0507447	FALSE
73	D1	150000.0	150000	N2	FAM	STANDARD	FAM	NFQ-MGB	Amp	21.8002	21.7296	0.984497	0.146648			FALSE	28536.5	TRUE	3	13					39.7084	0.994257	-3.5331	91.8837	0.734267	0.0507447	FALSE
74	D2	150000.0	150000	N2	FAM	STANDARD	FAM	NFQ-MGB	Amp	21.8277	21.7296	0.989912	0.146648			FALSE	28536.5	TRUE	3	16					39.7084	0.994257	-3.5331	91.8837	0.734267	0.0507447	FALSE
75	D3	150000.0	150000	N2	FAM	STANDARD	FAM	NFQ-MGB	Amp	21.561	21.7296	0.977343	0.146648			FALSE	28536.5	TRUE	3	14					39.7084	0.994257	-3.5331	91.8837	0.734267	0.0507447	FALSE
49	C1	1500000.0	1500000	N2	FAM	STANDARD	FAM	NFQ-MGB	Amp	18.1513	18.1511	0.965846	0.0228807			FALSE	28536.5	TRUE	3	12					39.7084	0.994257	-3.5331	91.8837	0.734267	0.0507447	FALSE
50	C2	1500000.0	1500000	N2	FAM	STANDARD	FAM	NFQ-MGB	Amp	18.1281	18.1511	0.968289	0.0228807			FALSE	28536.5	TRUE	3	11					39.7084	0.994257	-3.5331	91.8837	0.734267	0.0507447	FALSE
51	C3	1500000.0	1500000	N2	FAM	STANDARD	FAM	NFQ-MGB	Amp	18.1738	18.1511	0.970921	0.0228807			FALSE	28536.5	TRUE	3	11					39.7084	0.994257	-3.5331	91.8837	0.734267	0.0507447	FALSE
25	B1	1.5E7	15000000	N2	FAM	STANDARD	FAM	NFQ-MGB	Amp	13.7497	13.9967	0.85014	0.259145			FALSE	28536.5	TRUE	3	6					39.7084	0.994257	-3.5331	91.8837	0.734267	0.0507447	FALSE
26	B2	1.5E7	15000000	N2	FAM	STANDARD	FAM	NFQ-MGB	Amp	14.2665	13.9967	0.863407	0.259145			FALSE	28536.5	TRUE	3	8					39.7084	0.994257	-3.5331	91.8837	0.734267	0.0507447	FALSE
27	B3	1.5E7	15000000	N2	FAM	STANDARD	FAM	NFQ-MGB	Amp	13.974	13.9967	0.858199	0.259145			FALSE	28536.5	TRUE	3	9					39.7084	0.994257	-3.5331	91.8837	0.734267	0.0507447	FALSE
1	A1	1.5E8	150000000	N2	FAM	STANDARD	FAM	NFQ-MGB	Amp	10.0703	10.1623	0.770255	0.0906129			FALSE	28536.5	TRUE	3	5					39.7084	0.994257	-3.5331	91.8837	0.734267	0.0507447	FALSE
2	A2	1.5E8	150000000	N2	FAM	STANDARD	FAM	NFQ-MGB	Amp	10.2514	10.1623	0.777349	0.0906129			FALSE	28536.5	TRUE	3	5					39.7084	0.994257	-3.5331	91.8837	0.734267	0.0507447	FALSE
3	A3	1.5E8	150000000	N2	FAM	STANDARD	FAM	NFQ-MGB	Amp	10.1651	10.1623	0.771982	0.0906129			FALSE	28536.5	TRUE	3	5					39.7084	0.994257	-3.5331	91.8837	0.734267	0.0507447	FALSE
7	A7	Sample 01		N2	FAM	UNKNOWN	FAM	NFQ-MGB	No Amp	Undetermined		0				FALSE	28536.5	TRUE	3	39					39.7084	0.994257	-3.5331	91.8837	0.734267	0.0507447	FALSE		Sample 01	Lvr	Female	1.M	4.0404	100	150	1200	3	100	45	10wk	MADKV20
8	A8	Sample 01		N2	FAM	UNKNOWN	FAM	NFQ-MGB	No Amp	Undetermined		0				FALSE	28536.5	TRUE	3	39					39.7084	0.994257	-3.5331	91.8837	0.734267	0.0507447	FALSE
9	A9	Sample 01		N2	FAM	UNKNOWN	FAM	NFQ-MGB	No Amp	Undetermined		0				FALSE	28536.5	TRUE	3	39					39.7084	0.994257	-3.5331	91.8837	0.734267	0.0507447	FALSE
31	B7	Sample 02		N2	FAM	UNKNOWN	FAM	NFQ-MGB	No Amp	Undetermined		0				FALSE	28536.5	TRUE	3	39					39.7084	0.994257	-3.5331	91.8837	0.734267	0.0507447	FALSE		Sample 02	Lung	Female	1.M	0.740741	100	150	1200	3	100	34	10wk	MADKV20
32	B8	Sample 02		N2	FAM	UNKNOWN	FAM	NFQ-MGB	No Amp	Undetermined		0				FALSE	28536.5	TRUE	3	39					39.7084	0.994257	-3.5331	91.8837	0.734267	0.0507447	FALSE
33	B9	Sample 02		N2	FAM	UNKNOWN	FAM	NFQ-MGB	No Amp	Undetermined		0				FALSE	28536.5	TRUE	3	39					39.7084	0.994257	-3.5331	91.8837	0.734267	0.0507447	FALSE
55	C7	Sample 03		N2	FAM	UNKNOWN	FAM	NFQ-MGB	No Amp	Undetermined		0				FALSE	28536.5	TRUE	3	39					39.7084	0.994257	-3.5331	91.8837	0.734267	0.0507447	FALSE		Sample 03	Hrt	Female	1.M	13.3333	100	150	1200	3	100	26	10wk	MADKV20
56	C8	Sample 03		N2	FAM	UNKNOWN	FAM	NFQ-MGB	No Amp	Undetermined		0				FALSE	28536.5	TRUE	3	39					39.7084	0.994257	-3.5331	91.8837	0.734267	0.0507447	FALSE
57	C9	Sample 03		N2	FAM	UNKNOWN	FAM	NFQ-MGB	No Amp	Undetermined		0				FALSE	28536.5	TRUE	3	39					39.7084	0.994257	-3.5331	91.8837	0.734267	0.0507447	FALSE
79	D7	Sample 04		N2	FAM	UNKNOWN	FAM	NFQ-MGB	No Amp	Undetermined		0				FALSE	28536.5	TRUE	3	39					39.7084	0.994257	-3.5331	91.8837	0.734267	0.0507447	FALSE		Sample 04	Duo	Female	1.M	0.465116	100	150	1200	3	100	24	10wk	MADKV20
80	D8	Sample 04		N2	FAM	UNKNOWN	FAM	NFQ-MGB	No Amp	Undetermined		0				FALSE	28536.5	TRUE	3	39					39.7084	0.994257	-3.5331	91.8837	0.734267	0.0507447	FALSE
81	D9	Sample 04		N2	FAM	UNKNOWN	FAM	NFQ-MGB	No Amp	Undetermined		0				FALSE	28536.5	TRUE	3	39					39.7084	0.994257	-3.5331	91.8837	0.734267	0.0507447	FALSE
103	E7	Sample 05		N2	FAM	UNKNOWN	FAM	NFQ-MGB	No Amp	Undetermined		0				FALSE	28536.5	TRUE	3	39					39.7084	0.994257	-3.5331	91.8837	0.734267	0.0507447	FALSE		Sample 05	Stom	Female	1.M	0.392157	100	150	1200	3	100	44	10wk	MADKV20
104	E8	Sample 05		N2	FAM	UNKNOWN	FAM	NFQ-MGB	No Amp	Undetermined		0				FALSE	28536.5	TRUE	3	39					39.7084	0.994257	-3.5331	91.8837	0.734267	0.0507447	FALSE
105	E9	Sample 05		N2	FAM	UNKNOWN	FAM	NFQ-MGB	No Amp	Undetermined		0				FALSE	28536.5	TRUE	3	39					39.7084	0.994257	-3.5331	91.8837	0.734267	0.0507447	FALSE
127	F7	Sample 06		N2	FAM	UNKNOWN	FAM	NFQ-MGB	No Amp	Undetermined		0				FALSE	28536.5	TRUE	3	39					39.7084	0.994257	-3.5331	91.8837	0.734267	0.0507447	FALSE		Sample 06	Kid	Female	1.M	0.706714	100	150	1200	3	100	73	10wk	MADKV20
128	F8	Sample 06		N2	FAM	UNKNOWN	FAM	NFQ-MGB	No Amp	Undetermined		0				FALSE	28536.5	TRUE	3	39					39.7084	0.994257	-3.5331	91.8837	0.734267	0.0507447	FALSE
129	F9	Sample 06		N2	FAM	UNKNOWN	FAM	NFQ-MGB	No Amp	Undetermined		0				FALSE	28536.5	TRUE	3	39					39.7084	0.994257	-3.5331	91.8837	0.734267	0.0507447	FALSE
151	G7	Sample 07		N2	FAM	UNKNOWN	FAM	NFQ-MGB	No Amp	Undetermined		0				FALSE	28536.5	TRUE	3	39					39.7084	0.994257	-3.5331	91.8837	0.734267	0.0507447	FALSE		Sample 07	Spln	Female	1.M	11.5607	100	150	1200	3	100	16	10wk	MADKV20
152	G8	Sample 07		N2	FAM	UNKNOWN	FAM	NFQ-MGB	No Amp	Undetermined		0				FALSE	28536.5	TRUE	3	39					39.7084	0.994257	-3.5331	91.8837	0.734267	0.0507447	FALSE
153	G9	Sample 07		N2	FAM	UNKNOWN	FAM	NFQ-MGB	No Amp	Undetermined		0				FALSE	28536.5	TRUE	3	39					39.7084	0.994257	-3.5331	91.8837	0.734267	0.0507447	FALSE
199	I7	Sample 09		N2	FAM	UNKNOWN	FAM	NFQ-MGB	No Amp	Undetermined		0				FALSE	28536.5	TRUE	3	39					39.7084	0.994257	-3.5331	91.8837	0.734267	0.0507447	FALSE		Sample 09	Lvr	Female	2.M	4.2735	100	150	1200	3	100	77	10wk	MADKV20
200	I8	Sample 09		N2	FAM	UNKNOWN	FAM	NFQ-MGB	No Amp	Undetermined		0				FALSE	28536.5	TRUE	3	39					39.7084	0.994257	-3.5331	91.8837	0.734267	0.0507447	FALSE
201	I9	Sample 09		N2	FAM	UNKNOWN	FAM	NFQ-MGB	No Amp	Undetermined		0				FALSE	28536.5	TRUE	3	39					39.7084	0.994257	-3.5331	91.8837	0.734267	0.0507447	FALSE
223	J7	Sample 10		N2	FAM	UNKNOWN	FAM	NFQ-MGB	No Amp	Undetermined		0				FALSE	28536.5	TRUE	3	39					39.7084	0.994257	-3.5331	91.8837	0.734267	0.0507447	FALSE		Sample 10	Lung	Female	2.M	0.434783	100	150	1200	3	100	25	10wk	MADKV20
224	J8	Sample 10		N2	FAM	UNKNOWN	FAM	NFQ-MGB	No Amp	Undetermined		0				FALSE	28536.5	TRUE	3	39					39.7084	0.994257	-3.5331	91.8837	0.734267	0.0507447	FALSE
225	J9	Sample 10		N2	FAM	UNKNOWN	FAM	NFQ-MGB	No Amp	Undetermined		0				FALSE	28536.5	TRUE	3	39					39.7084	0.994257	-3.5331	91.8837	0.734267	0.0507447	FALSE
247	K7	Sample 11		N2	FAM	UNKNOWN	FAM	NFQ-MGB	No Amp	Undetermined		0				FALSE	28536.5	TRUE	3	39					39.7084	0.994257	-3.5331	91.8837	0.734267	0.0507447	FALSE		Sample 11	Hrt	Female	2.M	6.25	100	150	1200	3	100	21	10wk	MADKV20
248	K8	Sample 11		N2	FAM	UNKNOWN	FAM	NFQ-MGB	No Amp	Undetermined		0				FALSE	28536.5	TRUE	3	39					39.7084	0.994257	-3.5331	91.8837	0.734267	0.0507447	FALSE
249	K9	Sample 11		N2	FAM	UNKNOWN	FAM	NFQ-MGB	No Amp	Undetermined		0				FALSE	28536.5	TRUE	3	39					39.7084	0.994257	-3.5331	91.8837	0.734267	0.0507447	FALSE
271	L7	Sample 12		N2	FAM	UNKNOWN	FAM	NFQ-MGB	No Amp	Undetermined	38.4897	0				FALSE	28536.5	TRUE	3	39					39.7084	0.994257	-3.5331	91.8837	0.734267	0.0507447	FALSE		Sample 12	Duo	Female	2.M	0.692042	100	150	1200	3	100	22	10wk	MADKV20
272	L8	Sample 12	2.21282	N2	FAM	UNKNOWN	FAM	NFQ-MGB	Inconclusive	38.4897	38.4897	0.63475				FALSE	28536.5	TRUE	3	32					39.7084	0.994257	-3.5331	91.8837	0.734267	0.0507447	FALSE
273	L9	Sample 12		N2	FAM	UNKNOWN	FAM	NFQ-MGB	No Amp	Undetermined	38.4897	0				FALSE	28536.5	TRUE	3	39					39.7084	0.994257	-3.5331	91.8837	0.734267	0.0507447	FALSE
295	M7	Sample 13	3.59497	N2	FAM	UNKNOWN	FAM	NFQ-MGB	Amp	37.7451	37.7114	0.950365	0.0476797			FALSE	28536.5	TRUE	3	28					39.7084	0.994257	-3.5331	91.8837	0.734267	0.0507447	FALSE		Sample 13	Stom	Female	2.M	0.5	100	150	1200	3	100	23	10wk	MADKV20
296	M8	Sample 13		N2	FAM	UNKNOWN	FAM	NFQ-MGB	No Amp	Undetermined	37.7114	0	0.0476797			FALSE	28536.5	TRUE	3	39					39.7084	0.994257	-3.5331	91.8837	0.734267	0.0507447	FALSE
297	M9	Sample 13	3.75648	N2	FAM	UNKNOWN	FAM	NFQ-MGB	Inconclusive	37.6776	37.7114	0.924491	0.0476797			FALSE	28536.5	TRUE	3	29					39.7084	0.994257	-3.5331	91.8837	0.734267	0.0507447	FALSE
319	N7	Sample 14		N2	FAM	UNKNOWN	FAM	NFQ-MGB	No Amp	Undetermined		0				FALSE	28536.5	TRUE	3	39					39.7084	0.994257	-3.5331	91.8837	0.734267	0.0507447	FALSE		Sample 14	Kid	Female	2.M	0.925926	100	150	1200	3	100	62	10wk	MADKV20
320	N8	Sample 14		N2	FAM	UNKNOWN	FAM	NFQ-MGB	No Amp	Undetermined		0				FALSE	28536.5	TRUE	3	39					39.7084	0.994257	-3.5331	91.8837	0.734267	0.0507447	FALSE
321	N9	Sample 14		N2	FAM	UNKNOWN	FAM	NFQ-MGB	No Amp	Undetermined		0				FALSE	28536.5	TRUE	3	39					39.7084	0.994257	-3.5331	91.8837	0.734267	0.0507447	FALSE
343	O7	Sample 15		N2	FAM	UNKNOWN	FAM	NFQ-MGB	No Amp	Undetermined	39.3956	0				FALSE	28536.5	TRUE	3	39					39.7084	0.994257	-3.5331	91.8837	0.734267	0.0507447	FALSE		Sample 15	Spln	Female	2.M	1.33333	100	150	1200	3	100	17	10wk	MADKV20
344	O8	Sample 15		N2	FAM	UNKNOWN	FAM	NFQ-MGB	No Amp	Undetermined	39.3956	0				FALSE	28536.5	TRUE	3	39					39.7084	0.994257	-3.5331	91.8837	0.734267	0.0507447	FALSE
345	O9	Sample 15	1.2261	N2	FAM	UNKNOWN	FAM	NFQ-MGB	Inconclusive	39.3956	39.3956	0				FALSE	28536.5	TRUE	3	33					39.7084	0.994257	-3.5331	91.8837	0.734267	0.0507447	FALSE
10	A10	Sample 17	79.9432	N2	FAM	UNKNOWN	FAM	NFQ-MGB	Amp	32.9857	32.9057	0.972942	0.184793	84.6387	10.4916	FALSE	28536.5	TRUE	3	25					39.7084	0.994257	-3.5331	91.8837	0.734267	0.0507447	FALSE		Sample 17	Lvr	Female	3.M	4.2735	100	150	1200	3	100	44	10wk	MADKV20
11	A11	Sample 17	96.658	N2	FAM	UNKNOWN	FAM	NFQ-MGB	Amp	32.6944	32.9057	0.978098	0.184793	84.6387	10.4916	FALSE	28536.5	TRUE	3	26					39.7084	0.994257	-3.5331	91.8837	0.734267	0.0507447	FALSE
12	A12	Sample 17	77.3148	N2	FAM	UNKNOWN	FAM	NFQ-MGB	Amp	33.037	32.9057	0.961574	0.184793	84.6387	10.4916	FALSE	28536.5	TRUE	3	26					39.7084	0.994257	-3.5331	91.8837	0.734267	0.0507447	FALSE
34	B10	Sample 18		N2	FAM	UNKNOWN	FAM	NFQ-MGB	No Amp	Undetermined		0				FALSE	28536.5	TRUE	3	39					39.7084	0.994257	-3.5331	91.8837	0.734267	0.0507447	FALSE		Sample 18	Lung	Female	3.M	0.722022	100	150	1200	3	100	29	10wk	MADKV20
35	B11	Sample 18		N2	FAM	UNKNOWN	FAM	NFQ-MGB	No Amp	Undetermined		0				FALSE	28536.5	TRUE	3	39					39.7084	0.994257	-3.5331	91.8837	0.734267	0.0507447	FALSE
36	B12	Sample 18		N2	FAM	UNKNOWN	FAM	NFQ-MGB	No Amp	Undetermined		0				FALSE	28536.5	TRUE	3	39					39.7084	0.994257	-3.5331	91.8837	0.734267	0.0507447	FALSE
58	C10	Sample 19		N2	FAM	UNKNOWN	FAM	NFQ-MGB	No Amp	Undetermined	36.9111	0				FALSE	28536.5	TRUE	3	39					39.7084	0.994257	-3.5331	91.8837	0.734267	0.0507447	FALSE		Sample 19	Hrt	Female	3.M	4.52489	100	150	1200	3	100	21	10wk	MADKV20
59	C11	Sample 19	6.19068	N2	FAM	UNKNOWN	FAM	NFQ-MGB	Inconclusive	36.9111	36.9111	0.927883				FALSE	28536.5	TRUE	3	28					39.7084	0.994257	-3.5331	91.8837	0.734267	0.0507447	FALSE
60	C12	Sample 19		N2	FAM	UNKNOWN	FAM	NFQ-MGB	No Amp	Undetermined	36.9111	0				FALSE	28536.5	TRUE	3	39					39.7084	0.994257	-3.5331	91.8837	0.734267	0.0507447	FALSE
82	D10	Sample 20	9.26089	N2	FAM	UNKNOWN	FAM	NFQ-MGB	Inconclusive	36.2931	36.2931	0.948296				FALSE	28536.5	TRUE	3	30					39.7084	0.994257	-3.5331	91.8837	0.734267	0.0507447	FALSE		Sample 20	Duo	Female	3.M	3.18979	100	150	1200	3	100	10	10wk	MADKV20
83	D11	Sample 20		N2	FAM	UNKNOWN	FAM	NFQ-MGB	No Amp	Undetermined	36.2931	0				FALSE	28536.5	TRUE	3	39					39.7084	0.994257	-3.5331	91.8837	0.734267	0.0507447	FALSE
84	D12	Sample 20		N2	FAM	UNKNOWN	FAM	NFQ-MGB	No Amp	Undetermined	36.2931	0				FALSE	28536.5	TRUE	3	39					39.7084	0.994257	-3.5331	91.8837	0.734267	0.0507447	FALSE
106	E10	Sample 21		N2	FAM	UNKNOWN	FAM	NFQ-MGB	No Amp	Undetermined		0				FALSE	28536.5	TRUE	3	39					39.7084	0.994257	-3.5331	91.8837	0.734267	0.0507447	FALSE		Sample 21	Stom	Female	3.M	3.13972	100	150	1200	3	100	16	10wk	MADKV20
107	E11	Sample 21		N2	FAM	UNKNOWN	FAM	NFQ-MGB	No Amp	Undetermined		0				FALSE	28536.5	TRUE	3	39					39.7084	0.994257	-3.5331	91.8837	0.734267	0.0507447	FALSE
108	E12	Sample 21		N2	FAM	UNKNOWN	FAM	NFQ-MGB	No Amp	Undetermined		0				FALSE	28536.5	TRUE	3	39					39.7084	0.994257	-3.5331	91.8837	0.734267	0.0507447	FALSE
130	F10	Sample 22		N2	FAM	UNKNOWN	FAM	NFQ-MGB	No Amp	Undetermined		0				FALSE	28536.5	TRUE	3	39					39.7084	0.994257	-3.5331	91.8837	0.734267	0.0507447	FALSE		Sample 22	Kid	Female	3.M	2.01816	100	150	1200	3	100	46	10wk	MADKV20
131	F11	Sample 22		N2	FAM	UNKNOWN	FAM	NFQ-MGB	No Amp	Undetermined		0				FALSE	28536.5	TRUE	3	39					39.7084	0.994257	-3.5331	91.8837	0.734267	0.0507447	FALSE
132	F12	Sample 22		N2	FAM	UNKNOWN	FAM	NFQ-MGB	No Amp	Undetermined		0				FALSE	28536.5	TRUE	3	39					39.7084	0.994257	-3.5331	91.8837	0.734267	0.0507447	FALSE
154	G10	Sample 23		N2	FAM	UNKNOWN	FAM	NFQ-MGB	No Amp	Undetermined	37.5733	0				FALSE	28536.5	TRUE	3	39					39.7084	0.994257	-3.5331	91.8837	0.734267	0.0507447	FALSE		Sample 23	Spln	Female	3.M	1.25786	100	150	1200	3	100	9	10wk	MADKV20
155	G11	Sample 23		N2	FAM	UNKNOWN	FAM	NFQ-MGB	No Amp	Undetermined	37.5733	0				FALSE	28536.5	TRUE	3	39					39.7084	0.994257	-3.5331	91.8837	0.734267	0.0507447	FALSE
156	G12	Sample 23	4.02068	N2	FAM	UNKNOWN	FAM	NFQ-MGB	Inconclusive	37.5733	37.5733	0.949355				FALSE	28536.5	TRUE	3	30					39.7084	0.994257	-3.5331	91.8837	0.734267	0.0507447	FALSE
202	I10	Sample 25	1.07983e+07	N2	FAM	UNKNOWN	FAM	NFQ-MGB	Amp	14.8589	14.9481	0.928947	0.0773969	1.01966e+07	521523	FALSE	28536.5	TRUE	3	7					39.7084	0.994257	-3.5331	91.8837	0.734267	0.0507447	FALSE		Sample 25	Lvr	Female	1.2	5.97015	100	150	1200	3	100	68	10wk	MADKV20
203	I11	Sample 25	9.8731e+06	N2	FAM	UNKNOWN	FAM	NFQ-MGB	Amp	14.9963	14.9481	0.947232	0.0773969	1.01966e+07	521523	FALSE	28536.5	TRUE	3	9					39.7084	0.994257	-3.5331	91.8837	0.734267	0.0507447	FALSE
204	I12	Sample 25	9.91853e+06	N2	FAM	UNKNOWN	FAM	NFQ-MGB	Amp	14.9893	14.9481	0.936159	0.0773969	1.01966e+07	521523	FALSE	28536.5	TRUE	3	9					39.7084	0.994257	-3.5331	91.8837	0.734267	0.0507447	FALSE
226	J10	Sample 26	16.0915	N2	FAM	UNKNOWN	FAM	NFQ-MGB	Amp	35.4454	36.3928	0.972339	1.2292	10.3909	6.37333	FALSE	28536.5	TRUE	3	27					39.7084	0.994257	-3.5331	91.8837	0.734267	0.0507447	FALSE		Sample 26	Lung	Female	1.2	0.434783	100	150	1200	3	100	21	10wk	MADKV20
227	J11	Sample 26	11.5714	N2	FAM	UNKNOWN	FAM	NFQ-MGB	Amp	35.9514	36.3928	0.966036	1.2292	10.3909	6.37333	FALSE	28536.5	TRUE	3	24					39.7084	0.994257	-3.5331	91.8837	0.734267	0.0507447	FALSE
228	J12	Sample 26	3.5099	N2	FAM	UNKNOWN	FAM	NFQ-MGB	Inconclusive	37.7818	36.3928	0.919637	1.2292	10.3909	6.37333	FALSE	28536.5	TRUE	3	31					39.7084	0.994257	-3.5331	91.8837	0.734267	0.0507447	FALSE
250	K10	Sample 27	774.592	N2	FAM	UNKNOWN	FAM	NFQ-MGB	Amp	29.501	29.622	0.967569	0.123501	717.394	57.5586	FALSE	28536.5	TRUE	3	21					39.7084	0.994257	-3.5331	91.8837	0.734267	0.0507447	FALSE		Sample 27	Hrt	Female	1.2	5.6338	100	150	1200	3	100	28	10wk	MADKV20
251	K11	Sample 27	659.481	N2	FAM	UNKNOWN	FAM	NFQ-MGB	Amp	29.7479	29.622	0.981517	0.123501	717.394	57.5586	FALSE	28536.5	TRUE	3	21					39.7084	0.994257	-3.5331	91.8837	0.734267	0.0507447	FALSE
252	K12	Sample 27	718.108	N2	FAM	UNKNOWN	FAM	NFQ-MGB	Amp	29.6172	29.622	0.977193	0.123501	717.394	57.5586	FALSE	28536.5	TRUE	3	21					39.7084	0.994257	-3.5331	91.8837	0.734267	0.0507447	FALSE
274	L10	Sample 28	2.09993	N2	FAM	UNKNOWN	FAM	NFQ-MGB	Inconclusive	38.57	38.3039	0.525945	0.460034	2.57732	0.825705	FALSE	28536.5	TRUE	3	30					39.7084	0.994257	-3.5331	91.8837	0.734267	0.0507447	FALSE		Sample 28	Duo	Female	1.2	0.684932	100	150	1200	3	100	20	10wk	MADKV20
275	L11	Sample 28	3.53077	N2	FAM	UNKNOWN	FAM	NFQ-MGB	Amp	37.7727	38.3039	0.958039	0.460034	2.57732	0.825705	FALSE	28536.5	TRUE	3	30					39.7084	0.994257	-3.5331	91.8837	0.734267	0.0507447	FALSE
276	L12	Sample 28	2.10127	N2	FAM	UNKNOWN	FAM	NFQ-MGB	Inconclusive	38.569	38.3039	0.491767	0.460034	2.57732	0.825705	FALSE	28536.5	TRUE	3	33					39.7084	0.994257	-3.5331	91.8837	0.734267	0.0507447	FALSE
298	M10	Sample 29	74.069	N2	FAM	UNKNOWN	FAM	NFQ-MGB	Amp	33.1028	32.9449	0.971406	0.138066	82.3147	7.22184	FALSE	28536.5	TRUE	3	28					39.7084	0.994257	-3.5331	91.8837	0.734267	0.0507447	FALSE		Sample 29	Stom	Female	1.2	0.966184	100	150	1200	3	100	35	10wk	MADKV20
299	M11	Sample 29	87.5152	N2	FAM	UNKNOWN	FAM	NFQ-MGB	Amp	32.8468	32.9449	0.969002	0.138066	82.3147	7.22184	FALSE	28536.5	TRUE	3	25					39.7084	0.994257	-3.5331	91.8837	0.734267	0.0507447	FALSE
300	M12	Sample 29	85.36	N2	FAM	UNKNOWN	FAM	NFQ-MGB	Amp	32.8851	32.9449	0.975909	0.138066	82.3147	7.22184	FALSE	28536.5	TRUE	3	24					39.7084	0.994257	-3.5331	91.8837	0.734267	0.0507447	FALSE
322	N10	Sample 30	7.81984	N2	FAM	UNKNOWN	FAM	NFQ-MGB	Amp	36.5526	37.2178	0.959594	1.15631	5.92914	3.29596	FALSE	28536.5	TRUE	3	28					39.7084	0.994257	-3.5331	91.8837	0.734267	0.0507447	FALSE		Sample 30	Kid	Female	1.2	1.14286	100	150	1200	3	100	54	10wk	MADKV20
323	N11	Sample 30	2.12331	N2	FAM	UNKNOWN	FAM	NFQ-MGB	Inconclusive	38.553	37.2178	0.549824	1.15631	5.92914	3.29596	FALSE	28536.5	TRUE	3	31					39.7084	0.994257	-3.5331	91.8837	0.734267	0.0507447	FALSE
324	N12	Sample 30	7.84426	N2	FAM	UNKNOWN	FAM	NFQ-MGB	Amp	36.5479	37.2178	0.94476	1.15631	5.92914	3.29596	FALSE	28536.5	TRUE	3	28					39.7084	0.994257	-3.5331	91.8837	0.734267	0.0507447	FALSE
346	O10	Sample 31	36.8131	N2	FAM	UNKNOWN	FAM	NFQ-MGB	Amp	34.1756	34.662	0.978253	0.423143	27.5302	8.06098	FALSE	28536.5	TRUE	3	26					39.7084	0.994257	-3.5331	91.8837	0.734267	0.0507447	FALSE		Sample 31	Spln	Female	1.2	0.809717	100	150	1200	3	100	13	10wk	MADKV20
347	O11	Sample 31	22.2969	N2	FAM	UNKNOWN	FAM	NFQ-MGB	Amp	34.9449	34.662	0.970856	0.423143	27.5302	8.06098	FALSE	28536.5	TRUE	3	26					39.7084	0.994257	-3.5331	91.8837	0.734267	0.0507447	FALSE
348	O12	Sample 31	23.4806	N2	FAM	UNKNOWN	FAM	NFQ-MGB	Amp	34.8655	34.662	0.96523	0.423143	27.5302	8.06098	FALSE	28536.5	TRUE	3	28					39.7084	0.994257	-3.5331	91.8837	0.734267	0.0507447	FALSE
13	A13	Sample 33	3.24504e+07	N2	FAM	UNKNOWN	FAM	NFQ-MGB	Amp	13.1705	13.5853	0.738523	0.365462	2.52525e+07	6.3052e+06	FALSE	28536.5	TRUE	3	7					39.7084	0.994257	-3.5331	91.8837	0.734267	0.0507447	FALSE		Sample 33	Lvr	Female	2.2	2.36407	100	150	1200	3	100	54	10wk	MADKV20
14	A14	Sample 33	2.26013e+07	N2	FAM	UNKNOWN	FAM	NFQ-MGB	Amp	13.7255	13.5853	0.825745	0.365462	2.52525e+07	6.3052e+06	FALSE	28536.5	TRUE	3	7					39.7084	0.994257	-3.5331	91.8837	0.734267	0.0507447	FALSE
15	A15	Sample 33	2.07058e+07	N2	FAM	UNKNOWN	FAM	NFQ-MGB	Amp	13.8599	13.5853	0.843609	0.365462	2.52525e+07	6.3052e+06	FALSE	28536.5	TRUE	3	7					39.7084	0.994257	-3.5331	91.8837	0.734267	0.0507447	FALSE
37	B13	Sample 34	42.2976	N2	FAM	UNKNOWN	FAM	NFQ-MGB	Amp	33.9625	34.5611	0.971202	0.54013	29.8815	11.002	FALSE	28536.5	TRUE	3	26					39.7084	0.994257	-3.5331	91.8837	0.734267	0.0507447	FALSE		Sample 34	Lung	Female	2.2	0.566572	100	150	1200	3	100	30	10wk	MADKV20
38	B14	Sample 34	21.3441	N2	FAM	UNKNOWN	FAM	NFQ-MGB	Amp	35.0119	34.5611	0.956034	0.54013	29.8815	11.002	FALSE	28536.5	TRUE	3	28					39.7084	0.994257	-3.5331	91.8837	0.734267	0.0507447	FALSE
39	B15	Sample 34	26.0028	N2	FAM	UNKNOWN	FAM	NFQ-MGB	Amp	34.709	34.5611	0.981987	0.54013	29.8815	11.002	FALSE	28536.5	TRUE	3	29					39.7084	0.994257	-3.5331	91.8837	0.734267	0.0507447	FALSE
61	C13	Sample 35	184.818	N2	FAM	UNKNOWN	FAM	NFQ-MGB	Amp	31.6998	31.6217	0.975154	0.0778668	194.627	9.87201	FALSE	28536.5	TRUE	3	24					39.7084	0.994257	-3.5331	91.8837	0.734267	0.0507447	FALSE		Sample 35	Hrt	Female	2.2	5.39084	100	150	1200	3	100	19	10wk	MADKV20
62	C14	Sample 35	204.561	N2	FAM	UNKNOWN	FAM	NFQ-MGB	Amp	31.544	31.6217	0.969835	0.0778668	194.627	9.87201	FALSE	28536.5	TRUE	3	27					39.7084	0.994257	-3.5331	91.8837	0.734267	0.0507447	FALSE
63	C15	Sample 35	194.501	N2	FAM	UNKNOWN	FAM	NFQ-MGB	Amp	31.6214	31.6217	0.977643	0.0778668	194.627	9.87201	FALSE	28536.5	TRUE	3	26					39.7084	0.994257	-3.5331	91.8837	0.734267	0.0507447	FALSE
85	D13	Sample 36	4.58712	N2	FAM	UNKNOWN	FAM	NFQ-MGB	Inconclusive	37.3711	35.8687	0.944932	1.31273	14.898	9.21263	FALSE	28536.5	TRUE	3	31					39.7084	0.994257	-3.5331	91.8837	0.734267	0.0507447	FALSE		Sample 36	Duo	Female	2.2	2.30415	100	150	1200	3	100	10	10wk	MADKV20
86	D14	Sample 36	22.3199	N2	FAM	UNKNOWN	FAM	NFQ-MGB	Amp	34.9433	35.8687	0.964634	1.31273	14.898	9.21263	FALSE	28536.5	TRUE	3	25					39.7084	0.994257	-3.5331	91.8837	0.734267	0.0507447	FALSE
87	D15	Sample 36	17.7869	N2	FAM	UNKNOWN	FAM	NFQ-MGB	Amp	35.2917	35.8687	0.963774	1.31273	14.898	9.21263	FALSE	28536.5	TRUE	3	29					39.7084	0.994257	-3.5331	91.8837	0.734267	0.0507447	FALSE
109	E13	Sample 37	138.943	N2	FAM	UNKNOWN	FAM	NFQ-MGB	Amp	32.1375	31.9748	0.965603	0.161716	155.063	16.3033	FALSE	28536.5	TRUE	3	26					39.7084	0.994257	-3.5331	91.8837	0.734267	0.0507447	FALSE		Sample 37	Stom	Female	2.2	0.701754	100	150	1200	3	100	41	10wk	MADKV20
110	E14	Sample 37	154.701	N2	FAM	UNKNOWN	FAM	NFQ-MGB	Amp	31.9727	31.9748	0.978987	0.161716	155.063	16.3033	FALSE	28536.5	TRUE	3	23					39.7084	0.994257	-3.5331	91.8837	0.734267	0.0507447	FALSE
111	E15	Sample 37	171.544	N2	FAM	UNKNOWN	FAM	NFQ-MGB	Amp	31.8141	31.9748	0.984785	0.161716	155.063	16.3033	FALSE	28536.5	TRUE	3	24					39.7084	0.994257	-3.5331	91.8837	0.734267	0.0507447	FALSE
133	F13	Sample 38		N2	FAM	UNKNOWN	FAM	NFQ-MGB	No Amp	Undetermined		0				FALSE	28536.5	TRUE	3	39					39.7084	0.994257	-3.5331	91.8837	0.734267	0.0507447	FALSE		Sample 38	Kid	Female	2.2	2.04918	100	150	1200	3	100	43	10wk	MADKV20
134	F14	Sample 38		N2	FAM	UNKNOWN	FAM	NFQ-MGB	No Amp	Undetermined		0				FALSE	28536.5	TRUE	3	39					39.7084	0.994257	-3.5331	91.8837	0.734267	0.0507447	FALSE
135	F15	Sample 38		N2	FAM	UNKNOWN	FAM	NFQ-MGB	No Amp	Undetermined		0				FALSE	28536.5	TRUE	3	39					39.7084	0.994257	-3.5331	91.8837	0.734267	0.0507447	FALSE
157	G13	Sample 39	121.301	N2	FAM	UNKNOWN	FAM	NFQ-MGB	Amp	32.3459	32.368	0.974953	0.0600046	119.627	4.63339	FALSE	28536.5	TRUE	3	26					39.7084	0.994257	-3.5331	91.8837	0.734267	0.0507447	FALSE		Sample 39	Spln	Female	2.2	0.526316	100	150	1200	3	100	24	10wk	MADKV20
158	G14	Sample 39	123.19	N2	FAM	UNKNOWN	FAM	NFQ-MGB	Amp	32.3222	32.368	0.979101	0.0600046	119.627	4.63339	FALSE	28536.5	TRUE	3	26					39.7084	0.994257	-3.5331	91.8837	0.734267	0.0507447	FALSE
159	G15	Sample 39	114.389	N2	FAM	UNKNOWN	FAM	NFQ-MGB	Amp	32.4359	32.368	0.962295	0.0600046	119.627	4.63339	FALSE	28536.5	TRUE	3	26					39.7084	0.994257	-3.5331	91.8837	0.734267	0.0507447	FALSE
205	I13	Sample 41	9.459e+06	N2	FAM	UNKNOWN	FAM	NFQ-MGB	Amp	15.062	15.0148	0.947079	0.0557537	9.75907e+06	356845	FALSE	28536.5	TRUE	3	9					39.7084	0.994257	-3.5331	91.8837	0.734267	0.0507447	FALSE		Sample 41	Lvr	Female	3.2	3.5461	100	150	1200	3	100	46	10wk	MADKV20
206	I14	Sample 41	9.66455e+06	N2	FAM	UNKNOWN	FAM	NFQ-MGB	Amp	15.0291	15.0148	0.948325	0.0557537	9.75907e+06	356845	FALSE	28536.5	TRUE	3	9					39.7084	0.994257	-3.5331	91.8837	0.734267	0.0507447	FALSE
207	I15	Sample 41	1.01537e+07	N2	FAM	UNKNOWN	FAM	NFQ-MGB	Amp	14.9533	15.0148	0.933877	0.0557537	9.75907e+06	356845	FALSE	28536.5	TRUE	3	9					39.7084	0.994257	-3.5331	91.8837	0.734267	0.0507447	FALSE
229	J13	Sample 42	9.24957	N2	FAM	UNKNOWN	FAM	NFQ-MGB	Amp	36.295	36.1508	0.954325	0.190892	10.2144	1.30593	FALSE	28536.5	TRUE	3	29					39.7084	0.994257	-3.5331	91.8837	0.734267	0.0507447	FALSE		Sample 42	Lung	Female	3.2	0.492611	100	150	1200	3	100	26	10wk	MADKV20
230	J14	Sample 42	11.7004	N2	FAM	UNKNOWN	FAM	NFQ-MGB	Amp	35.9343	36.1508	0.967947	0.190892	10.2144	1.30593	FALSE	28536.5	TRUE	3	28					39.7084	0.994257	-3.5331	91.8837	0.734267	0.0507447	FALSE
231	J15	Sample 42	9.69318	N2	FAM	UNKNOWN	FAM	NFQ-MGB	Amp	36.2231	36.1508	0.957796	0.190892	10.2144	1.30593	FALSE	28536.5	TRUE	3	30					39.7084	0.994257	-3.5331	91.8837	0.734267	0.0507447	FALSE
253	K13	Sample 43	52.4186	N2	FAM	UNKNOWN	FAM	NFQ-MGB	Amp	33.6333	33.7869	0.960865	0.168072	47.6136	5.143	FALSE	28536.5	TRUE	3	26					39.7084	0.994257	-3.5331	91.8837	0.734267	0.0507447	FALSE		Sample 43	Hrt	Female	3.2	6.71141	100	150	1200	3	100	21	10wk	MADKV20
254	K14	Sample 43	48.2335	N2	FAM	UNKNOWN	FAM	NFQ-MGB	Amp	33.761	33.7869	0.969115	0.168072	47.6136	5.143	FALSE	28536.5	TRUE	3	26					39.7084	0.994257	-3.5331	91.8837	0.734267	0.0507447	FALSE
255	K15	Sample 43	42.1888	N2	FAM	UNKNOWN	FAM	NFQ-MGB	Amp	33.9664	33.7869	0.980012	0.168072	47.6136	5.143	FALSE	28536.5	TRUE	3	26					39.7084	0.994257	-3.5331	91.8837	0.734267	0.0507447	FALSE
277	L13	Sample 44		N2	FAM	UNKNOWN	FAM	NFQ-MGB	No Amp	Undetermined	37.5165	0	1.40959			FALSE	28536.5	TRUE	3	39					39.7084	0.994257	-3.5331	91.8837	0.734267	0.0507447	FALSE		Sample 44	Duo	Female	3.2	2	100	150	1200	3	100	22	10wk	MADKV20
278	L14	Sample 44	2.17915	N2	FAM	UNKNOWN	FAM	NFQ-MGB	Inconclusive	38.5132	37.5165	0.607464	1.40959			FALSE	28536.5	TRUE	3	27					39.7084	0.994257	-3.5331	91.8837	0.734267	0.0507447	FALSE
279	L15	Sample 44	7.98933	N2	FAM	UNKNOWN	FAM	NFQ-MGB	Amp	36.5197	37.5165	0.961896	1.40959			FALSE	28536.5	TRUE	3	27					39.7084	0.994257	-3.5331	91.8837	0.734267	0.0507447	FALSE
301	M13	Sample 45	18.1163	N2	FAM	UNKNOWN	FAM	NFQ-MGB	Amp	35.2635	35.702	0.935681	0.381758	13.9082	3.65661	FALSE	28536.5	TRUE	3	25					39.7084	0.994257	-3.5331	91.8837	0.734267	0.0507447	FALSE		Sample 45	Stom	Female	3.2	0.407332	100	150	1200	3	100	37	10wk	MADKV20
302	M14	Sample 45	11.5045	N2	FAM	UNKNOWN	FAM	NFQ-MGB	Amp	35.9603	35.702	0.964685	0.381758	13.9082	3.65661	FALSE	28536.5	TRUE	3	30					39.7084	0.994257	-3.5331	91.8837	0.734267	0.0507447	FALSE
303	M15	Sample 45	12.1039	N2	FAM	UNKNOWN	FAM	NFQ-MGB	Amp	35.8823	35.702	0.952724	0.381758	13.9082	3.65661	FALSE	28536.5	TRUE	3	24					39.7084	0.994257	-3.5331	91.8837	0.734267	0.0507447	FALSE
325	N13	Sample 46	60.6727	N2	FAM	UNKNOWN	FAM	NFQ-MGB	Amp	33.4089	33.5707	0.972823	0.603067	57.3106	20.4951	FALSE	28536.5	TRUE	3	26					39.7084	0.994257	-3.5331	91.8837	0.734267	0.0507447	FALSE		Sample 46	Kid	Female	3.2	1.6	100	150	1200	3	100	42	10wk	MADKV20
326	N14	Sample 46	75.9168	N2	FAM	UNKNOWN	FAM	NFQ-MGB	Amp	33.065	33.5707	0.969434	0.603067	57.3106	20.4951	FALSE	28536.5	TRUE	3	27					39.7084	0.994257	-3.5331	91.8837	0.734267	0.0507447	FALSE
327	N15	Sample 46	35.3423	N2	FAM	UNKNOWN	FAM	NFQ-MGB	Amp	34.2381	33.5707	0.95837	0.603067	57.3106	20.4951	FALSE	28536.5	TRUE	3	26					39.7084	0.994257	-3.5331	91.8837	0.734267	0.0507447	FALSE
349	O13	Sample 47	56.0422	N2	FAM	UNKNOWN	FAM	NFQ-MGB	Amp	33.5307	33.8563	0.974248	0.623461	47.6622	16.7526	FALSE	28536.5	TRUE	3	24					39.7084	0.994257	-3.5331	91.8837	0.734267	0.0507447	FALSE		Sample 47	Spln	Female	3.2	0.555556	100	150	1200	3	100	22	10wk	MADKV20
350	O14	Sample 47	58.5712	N2	FAM	UNKNOWN	FAM	NFQ-MGB	Amp	33.463	33.8563	0.980962	0.623461	47.6622	16.7526	FALSE	28536.5	TRUE	3	26					39.7084	0.994257	-3.5331	91.8837	0.734267	0.0507447	FALSE
351	O15	Sample 47	28.3732	N2	FAM	UNKNOWN	FAM	NFQ-MGB	Amp	34.5751	33.8563	0.974986	0.623461	47.6622	16.7526	FALSE	28536.5	TRUE	3	27					39.7084	0.994257	-3.5331	91.8837	0.734267	0.0507447	FALSE
16	A16	Sample 49	449781	N2	FAM	UNKNOWN	FAM	NFQ-MGB	Amp	19.7358	19.8742	0.84995	0.217325	413659	56058.4	FALSE	28536.5	TRUE	3	14					39.7084	0.994257	-3.5331	91.8837	0.734267	0.0507447	FALSE		Sample 49	Lvr	Female	1.4	7.35294	100	150	1200	3	100	31	10wk	MADKV20
17	A17	Sample 49	442116	N2	FAM	UNKNOWN	FAM	NFQ-MGB	Amp	19.7622	19.8742	0.879991	0.217325	413659	56058.4	FALSE	28536.5	TRUE	3	14					39.7084	0.994257	-3.5331	91.8837	0.734267	0.0507447	FALSE
18	A18	Sample 49	349079	N2	FAM	UNKNOWN	FAM	NFQ-MGB	Amp	20.1247	19.8742	0.988915	0.217325	413659	56058.4	FALSE	28536.5	TRUE	3	15					39.7084	0.994257	-3.5331	91.8837	0.734267	0.0507447	FALSE
40	B16	Sample 50	4.03511	N2	FAM	UNKNOWN	FAM	NFQ-MGB	Inconclusive	37.5679	37.239	0.895098	0.524323	5.20891	1.91139	FALSE	28536.5	TRUE	3	33					39.7084	0.994257	-3.5331	91.8837	0.734267	0.0507447	FALSE		Sample 50	Lung	Female	1.4	0.600601	100	150	1200	3	100	40	10wk	MADKV20
41	B17	Sample 50	4.17716	N2	FAM	UNKNOWN	FAM	NFQ-MGB	Inconclusive	37.5148	37.239	0.9089	0.524323	5.20891	1.91139	FALSE	28536.5	TRUE	3	30					39.7084	0.994257	-3.5331	91.8837	0.734267	0.0507447	FALSE
42	B18	Sample 50	7.41448	N2	FAM	UNKNOWN	FAM	NFQ-MGB	Inconclusive	36.6343	37.239	0.945006	0.524323	5.20891	1.91139	FALSE	28536.5	TRUE	3	28					39.7084	0.994257	-3.5331	91.8837	0.734267	0.0507447	FALSE
64	C16	Sample 51	31.9139	N2	FAM	UNKNOWN	FAM	NFQ-MGB	Amp	34.3947	34.5014	0.956039	0.598211	31.2449	11.365	FALSE	28536.5	TRUE	3	28					39.7084	0.994257	-3.5331	91.8837	0.734267	0.0507447	FALSE		Sample 51	Hrt	Female	1.4	7.35294	100	150	1200	3	100	19	10wk	MADKV20
65	C17	Sample 51	19.5602	N2	FAM	UNKNOWN	FAM	NFQ-MGB	Amp	35.1459	34.5014	0.955566	0.598211	31.2449	11.365	FALSE	28536.5	TRUE	3	28					39.7084	0.994257	-3.5331	91.8837	0.734267	0.0507447	FALSE
66	C18	Sample 51	42.2607	N2	FAM	UNKNOWN	FAM	NFQ-MGB	Amp	33.9638	34.5014	0.956769	0.598211	31.2449	11.365	FALSE	28536.5	TRUE	3	26					39.7084	0.994257	-3.5331	91.8837	0.734267	0.0507447	FALSE
88	D16	Sample 52		N2	FAM	UNKNOWN	FAM	NFQ-MGB	No Amp	Undetermined		0				FALSE	28536.5	TRUE	3	39					39.7084	0.994257	-3.5331	91.8837	0.734267	0.0507447	FALSE		Sample 52	Duo	Female	1.4	2.20264	100	150	1200	3	100	5	10wk	MADKV20
89	D17	Sample 52		N2	FAM	UNKNOWN	FAM	NFQ-MGB	No Amp	Undetermined		0				FALSE	28536.5	TRUE	3	39					39.7084	0.994257	-3.5331	91.8837	0.734267	0.0507447	FALSE
90	D18	Sample 52		N2	FAM	UNKNOWN	FAM	NFQ-MGB	No Amp	Undetermined		0				FALSE	28536.5	TRUE	3	39					39.7084	0.994257	-3.5331	91.8837	0.734267	0.0507447	FALSE
112	E16	Sample 53	26.6558	N2	FAM	UNKNOWN	FAM	NFQ-MGB	Amp	34.6709	34.5333	0.953659	0.152729	29.2538	2.94469	FALSE	28536.5	TRUE	3	28					39.7084	0.994257	-3.5331	91.8837	0.734267	0.0507447	FALSE		Sample 53	Stom	Female	1.4	0.675676	100	150	1200	3	100	24	10wk	MADKV20
113	E17	Sample 53	28.6531	N2	FAM	UNKNOWN	FAM	NFQ-MGB	Amp	34.5601	34.5333	0.949315	0.152729	29.2538	2.94469	FALSE	28536.5	TRUE	3	25					39.7084	0.994257	-3.5331	91.8837	0.734267	0.0507447	FALSE
114	E18	Sample 53	32.4525	N2	FAM	UNKNOWN	FAM	NFQ-MGB	Amp	34.369	34.5333	0.958132	0.152729	29.2538	2.94469	FALSE	28536.5	TRUE	3	26					39.7084	0.994257	-3.5331	91.8837	0.734267	0.0507447	FALSE
136	F16	Sample 54	2.61261	N2	FAM	UNKNOWN	FAM	NFQ-MGB	Inconclusive	38.2348	38.2348	0.900244				FALSE	28536.5	TRUE	3	32					39.7084	0.994257	-3.5331	91.8837	0.734267	0.0507447	FALSE		Sample 54	Kid	Female	1.4	1.6129	100	150	1200	3	100	47	10wk	MADKV20
137	F17	Sample 54		N2	FAM	UNKNOWN	FAM	NFQ-MGB	No Amp	Undetermined	38.2348	0				FALSE	28536.5	TRUE	3	39					39.7084	0.994257	-3.5331	91.8837	0.734267	0.0507447	FALSE
138	F18	Sample 54		N2	FAM	UNKNOWN	FAM	NFQ-MGB	No Amp	Undetermined	38.2348	0				FALSE	28536.5	TRUE	3	39					39.7084	0.994257	-3.5331	91.8837	0.734267	0.0507447	FALSE
160	G16	Sample 55	25.211	N2	FAM	UNKNOWN	FAM	NFQ-MGB	Amp	34.7564	35.3298	0.963621	0.649041	18.3573	7.14029	FALSE	28536.5	TRUE	3	26					39.7084	0.994257	-3.5331	91.8837	0.734267	0.0507447	FALSE		Sample 55	Spln	Female	1.4	1.65289	100	150	1200	3	100	11	10wk	MADKV20
161	G17	Sample 55	18.8998	N2	FAM	UNKNOWN	FAM	NFQ-MGB	Amp	35.1986	35.3298	0.962719	0.649041	18.3573	7.14029	FALSE	28536.5	TRUE	3	26					39.7084	0.994257	-3.5331	91.8837	0.734267	0.0507447	FALSE
162	G18	Sample 55	10.9613	N2	FAM	UNKNOWN	FAM	NFQ-MGB	Amp	36.0345	35.3298	0.948616	0.649041	18.3573	7.14029	FALSE	28536.5	TRUE	3	30					39.7084	0.994257	-3.5331	91.8837	0.734267	0.0507447	FALSE
208	I16	Sample 57	241586	N2	FAM	UNKNOWN	FAM	NFQ-MGB	Amp	20.6895	20.723	0.984681	0.0972273	236685	14772.5	FALSE	28536.5	TRUE	3	13					39.7084	0.994257	-3.5331	91.8837	0.734267	0.0507447	FALSE		Sample 57	Lvr	Female	2.4	2.74725	100	150	1200	3	100	36	10wk	MADKV20
209	I17	Sample 57	220085	N2	FAM	UNKNOWN	FAM	NFQ-MGB	Amp	20.8325	20.723	0.986046	0.0972273	236685	14772.5	FALSE	28536.5	TRUE	3	14					39.7084	0.994257	-3.5331	91.8837	0.734267	0.0507447	FALSE
210	I18	Sample 57	248384	N2	FAM	UNKNOWN	FAM	NFQ-MGB	Amp	20.6469	20.723	0.980554	0.0972273	236685	14772.5	FALSE	28536.5	TRUE	3	12					39.7084	0.994257	-3.5331	91.8837	0.734267	0.0507447	FALSE
232	J16	Sample 58	1.38301	N2	FAM	UNKNOWN	FAM	NFQ-MGB	Inconclusive	39.2108	38.2687	0	0.827236	2.7861	1.25382	FALSE	28536.5	TRUE	3	31					39.7084	0.994257	-3.5331	91.8837	0.734267	0.0507447	FALSE		Sample 58	Lung	Female	2.4	0.558659	100	150	1200	3	100	33	10wk	MADKV20
233	J17	Sample 58	3.17847	N2	FAM	UNKNOWN	FAM	NFQ-MGB	Inconclusive	37.934	38.2687	0.918704	0.827236	2.7861	1.25382	FALSE	28536.5	TRUE	3	30					39.7084	0.994257	-3.5331	91.8837	0.734267	0.0507447	FALSE
234	J18	Sample 58	3.79681	N2	FAM	UNKNOWN	FAM	NFQ-MGB	Inconclusive	37.6613	38.2687	0.902597	0.827236	2.7861	1.25382	FALSE	28536.5	TRUE	3	32					39.7084	0.994257	-3.5331	91.8837	0.734267	0.0507447	FALSE
256	K16	Sample 59	21.0808	N2	FAM	UNKNOWN	FAM	NFQ-MGB	Amp	35.031	34.6369	0.954334	0.350401	27.7137	5.96382	FALSE	28536.5	TRUE	3	27					39.7084	0.994257	-3.5331	91.8837	0.734267	0.0507447	FALSE		Sample 59	Hrt	Female	2.4	6.94444	100	150	1200	3	100	19	10wk	MADKV20
257	K17	Sample 59	32.6335	N2	FAM	UNKNOWN	FAM	NFQ-MGB	Amp	34.3605	34.6369	0.965055	0.350401	27.7137	5.96382	FALSE	28536.5	TRUE	3	27					39.7084	0.994257	-3.5331	91.8837	0.734267	0.0507447	FALSE
258	K18	Sample 59	29.4269	N2	FAM	UNKNOWN	FAM	NFQ-MGB	Amp	34.5192	34.6369	0.97102	0.350401	27.7137	5.96382	FALSE	28536.5	TRUE	3	27					39.7084	0.994257	-3.5331	91.8837	0.734267	0.0507447	FALSE
280	L16	Sample 60		N2	FAM	UNKNOWN	FAM	NFQ-MGB	No Amp	Undetermined		0				FALSE	28536.5	TRUE	3	39					39.7084	0.994257	-3.5331	91.8837	0.734267	0.0507447	FALSE		Sample 60	Duo	Female	2.4	0.431034	100	150	1200	3	100	23	10wk	MADKV20
281	L17	Sample 60		N2	FAM	UNKNOWN	FAM	NFQ-MGB	No Amp	Undetermined		0				FALSE	28536.5	TRUE	3	39					39.7084	0.994257	-3.5331	91.8837	0.734267	0.0507447	FALSE
282	L18	Sample 60		N2	FAM	UNKNOWN	FAM	NFQ-MGB	No Amp	Undetermined		0				FALSE	28536.5	TRUE	3	39					39.7084	0.994257	-3.5331	91.8837	0.734267	0.0507447	FALSE
304	M16	Sample 61	16.4128	N2	FAM	UNKNOWN	FAM	NFQ-MGB	Amp	35.415	36.1919	0.958239	0.67334	10.5916	5.04306	FALSE	28536.5	TRUE	3	26					39.7084	0.994257	-3.5331	91.8837	0.734267	0.0507447	FALSE		Sample 61	Stom	Female	2.4	0.409836	100	150	1200	3	100	34	10wk	MADKV20
305	M17	Sample 61	7.81707	N2	FAM	UNKNOWN	FAM	NFQ-MGB	Amp	36.5532	36.1919	0.951242	0.67334	10.5916	5.04306	FALSE	28536.5	TRUE	3	28					39.7084	0.994257	-3.5331	91.8837	0.734267	0.0507447	FALSE
306	M18	Sample 61	7.54512	N2	FAM	UNKNOWN	FAM	NFQ-MGB	Amp	36.6075	36.1919	0.947879	0.67334	10.5916	5.04306	FALSE	28536.5	TRUE	3	28					39.7084	0.994257	-3.5331	91.8837	0.734267	0.0507447	FALSE
328	N16	Sample 62		N2	FAM	UNKNOWN	FAM	NFQ-MGB	No Amp	Undetermined	39.713	0				FALSE	28536.5	TRUE	3	39					39.7084	0.994257	-3.5331	91.8837	0.734267	0.0507447	FALSE		Sample 62	Kid	Female	2.4	1.25	100	150	1200	3	100	53	10wk	MADKV20
329	N17	Sample 62		N2	FAM	UNKNOWN	FAM	NFQ-MGB	No Amp	Undetermined	39.713	0				FALSE	28536.5	TRUE	3	39					39.7084	0.994257	-3.5331	91.8837	0.734267	0.0507447	FALSE
330	N18	Sample 62	0.996996	N2	FAM	UNKNOWN	FAM	NFQ-MGB	Inconclusive	39.713	39.713	0				FALSE	28536.5	TRUE	3	31					39.7084	0.994257	-3.5331	91.8837	0.734267	0.0507447	FALSE
352	O16	Sample 63	9.9416	N2	FAM	UNKNOWN	FAM	NFQ-MGB	Amp	36.1843	36.0123	0.951026	0.163223	11.1629	1.1747	FALSE	28536.5	TRUE	3	29					39.7084	0.994257	-3.5331	91.8837	0.734267	0.0507447	FALSE		Sample 63	Spln	Female	2.4	0.862069	100	150	1200	3	100	11	10wk	MADKV20
353	O17	Sample 63	11.2623	N2	FAM	UNKNOWN	FAM	NFQ-MGB	Amp	35.9929	36.0123	0.963813	0.163223	11.1629	1.1747	FALSE	28536.5	TRUE	3	30					39.7084	0.994257	-3.5331	91.8837	0.734267	0.0507447	FALSE
354	O18	Sample 63	12.2847	N2	FAM	UNKNOWN	FAM	NFQ-MGB	Amp	35.8596	36.0123	0.956747	0.163223	11.1629	1.1747	FALSE	28536.5	TRUE	3	28					39.7084	0.994257	-3.5331	91.8837	0.734267	0.0507447	FALSE
19	A19	Sample 65	319748	N2	FAM	UNKNOWN	FAM	NFQ-MGB	Amp	20.2594	20.1183	0.977629	0.193143	352424	45668.5	FALSE	28536.5	TRUE	3	14					39.7084	0.994257	-3.5331	91.8837	0.734267	0.0507447	FALSE		Sample 65	Lvr	Female	3.4	1.76991	100	150	1200	3	100	30	10wk	MADKV20
20	A20	Sample 65	404606	N2	FAM	UNKNOWN	FAM	NFQ-MGB	Amp	19.8982	20.1183	0.957085	0.193143	352424	45668.5	FALSE	28536.5	TRUE	3	14					39.7084	0.994257	-3.5331	91.8837	0.734267	0.0507447	FALSE
21	A21	Sample 65	332917	N2	FAM	UNKNOWN	FAM	NFQ-MGB	Amp	20.1974	20.1183	0.988802	0.193143	352424	45668.5	FALSE	28536.5	TRUE	3	11					39.7084	0.994257	-3.5331	91.8837	0.734267	0.0507447	FALSE
43	B19	Sample 66		N2	FAM	UNKNOWN	FAM	NFQ-MGB	No Amp	Undetermined		0				FALSE	28536.5	TRUE	3	39					39.7084	0.994257	-3.5331	91.8837	0.734267	0.0507447	FALSE		Sample 66	Lung	Female	3.4	0.597015	100	150	1200	3	100	26	10wk	MADKV20
44	B20	Sample 66		N2	FAM	UNKNOWN	FAM	NFQ-MGB	No Amp	Undetermined		0				FALSE	28536.5	TRUE	3	39					39.7084	0.994257	-3.5331	91.8837	0.734267	0.0507447	FALSE
45	B21	Sample 66		N2	FAM	UNKNOWN	FAM	NFQ-MGB	No Amp	Undetermined		0				FALSE	28536.5	TRUE	3	39					39.7084	0.994257	-3.5331	91.8837	0.734267	0.0507447	FALSE
67	C19	Sample 67	6.88727	N2	FAM	UNKNOWN	FAM	NFQ-MGB	Inconclusive	36.7475	36.5299	0.926185	0.294444	8.03751	1.6068	FALSE	28536.5	TRUE	3	29					39.7084	0.994257	-3.5331	91.8837	0.734267	0.0507447	FALSE		Sample 67	Hrt	Female	3.4	12.2699	100	150	1200	3	100	14	10wk	MADKV20
68	C20	Sample 67	9.87338	N2	FAM	UNKNOWN	FAM	NFQ-MGB	Amp	36.1949	36.5299	0.935493	0.294444	8.03751	1.6068	FALSE	28536.5	TRUE	3	28					39.7084	0.994257	-3.5331	91.8837	0.734267	0.0507447	FALSE
69	C21	Sample 67	7.35186	N2	FAM	UNKNOWN	FAM	NFQ-MGB	Amp	36.6473	36.5299	0.941292	0.294444	8.03751	1.6068	FALSE	28536.5	TRUE	3	30					39.7084	0.994257	-3.5331	91.8837	0.734267	0.0507447	FALSE
91	D19	Sample 68		N2	FAM	UNKNOWN	FAM	NFQ-MGB	No Amp	Undetermined		0				FALSE	28536.5	TRUE	3	39					39.7084	0.994257	-3.5331	91.8837	0.734267	0.0507447	FALSE		Sample 68	Duo	Female	3.4	3.38409	100	150	1200	3	100	14	10wk	MADKV20
92	D20	Sample 68		N2	FAM	UNKNOWN	FAM	NFQ-MGB	No Amp	Undetermined		0				FALSE	28536.5	TRUE	3	39					39.7084	0.994257	-3.5331	91.8837	0.734267	0.0507447	FALSE
93	D21	Sample 68		N2	FAM	UNKNOWN	FAM	NFQ-MGB	No Amp	Undetermined		0				FALSE	28536.5	TRUE	3	39					39.7084	0.994257	-3.5331	91.8837	0.734267	0.0507447	FALSE
115	E19	Sample 69		N2	FAM	UNKNOWN	FAM	NFQ-MGB	No Amp	Undetermined		0				FALSE	28536.5	TRUE	3	39					39.7084	0.994257	-3.5331	91.8837	0.734267	0.0507447	FALSE		Sample 69	Stom	Female	3.4	7.60456	100	150	1200	3	100	13	10wk	MADKV20
116	E20	Sample 69		N2	FAM	UNKNOWN	FAM	NFQ-MGB	No Amp	Undetermined		0				FALSE	28536.5	TRUE	3	39					39.7084	0.994257	-3.5331	91.8837	0.734267	0.0507447	FALSE
117	E21	Sample 69		N2	FAM	UNKNOWN	FAM	NFQ-MGB	No Amp	Undetermined		0				FALSE	28536.5	TRUE	3	39					39.7084	0.994257	-3.5331	91.8837	0.734267	0.0507447	FALSE
139	F19	Sample 70		N2	FAM	UNKNOWN	FAM	NFQ-MGB	No Amp	Undetermined		0				FALSE	28536.5	TRUE	3	39					39.7084	0.994257	-3.5331	91.8837	0.734267	0.0507447	FALSE		Sample 70	Kid	Female	3.4	2.72851	100	150	1200	3	100	36	10wk	MADKV20
140	F20	Sample 70		N2	FAM	UNKNOWN	FAM	NFQ-MGB	No Amp	Undetermined		0				FALSE	28536.5	TRUE	3	39					39.7084	0.994257	-3.5331	91.8837	0.734267	0.0507447	FALSE
141	F21	Sample 70		N2	FAM	UNKNOWN	FAM	NFQ-MGB	No Amp	Undetermined		0				FALSE	28536.5	TRUE	3	39					39.7084	0.994257	-3.5331	91.8837	0.734267	0.0507447	FALSE
163	G19	Sample 71	13.3944	N2	FAM	UNKNOWN	FAM	NFQ-MGB	Amp	35.7269	35.3847	0.961492	0.516949	17.4204	6.28756	FALSE	28536.5	TRUE	3	27					39.7084	0.994257	-3.5331	91.8837	0.734267	0.0507447	FALSE		Sample 71	Spln	Female	3.4	1.94175	100	150	1200	3	100	15	10wk	MADKV20
164	G20	Sample 71	14.2012	N2	FAM	UNKNOWN	FAM	NFQ-MGB	Amp	35.6371	35.3847	0.966618	0.516949	17.4204	6.28756	FALSE	28536.5	TRUE	3	26					39.7084	0.994257	-3.5331	91.8837	0.734267	0.0507447	FALSE
165	G21	Sample 71	24.6657	N2	FAM	UNKNOWN	FAM	NFQ-MGB	Amp	34.79	35.3847	0.974668	0.516949	17.4204	6.28756	FALSE	28536.5	TRUE	3	26					39.7084	0.994257	-3.5331	91.8837	0.734267	0.0507447	FALSE
211	I19	Sample 73	448.756	N2	FAM	UNKNOWN	FAM	NFQ-MGB	Amp	30.3386	30.4252	0.987093	0.0819356	424.54	22.7733	FALSE	28536.5	TRUE	3	24					39.7084	0.994257	-3.5331	91.8837	0.734267	0.0507447	FALSE		Sample 73	Lvr	Female	1.7	1.0929	100	150	1200	3	100	30	10wk	MADKV20
212	I20	Sample 73	421.31	N2	FAM	UNKNOWN	FAM	NFQ-MGB	Amp	30.4354	30.4252	0.979954	0.0819356	424.54	22.7733	FALSE	28536.5	TRUE	3	21					39.7084	0.994257	-3.5331	91.8837	0.734267	0.0507447	FALSE
213	I21	Sample 73	403.554	N2	FAM	UNKNOWN	FAM	NFQ-MGB	Amp	30.5015	30.4252	0.987174	0.0819356	424.54	22.7733	FALSE	28536.5	TRUE	3	22					39.7084	0.994257	-3.5331	91.8837	0.734267	0.0507447	FALSE
235	J19	Sample 74		N2	FAM	UNKNOWN	FAM	NFQ-MGB	No Amp	Undetermined		0				FALSE	28536.5	TRUE	3	39					39.7084	0.994257	-3.5331	91.8837	0.734267	0.0507447	FALSE		Sample 74	Lung	Female	1.7	0.735294	100	150	1200	3	100	43	10wk	MADKV20
236	J20	Sample 74		N2	FAM	UNKNOWN	FAM	NFQ-MGB	No Amp	Undetermined		0				FALSE	28536.5	TRUE	3	39					39.7084	0.994257	-3.5331	91.8837	0.734267	0.0507447	FALSE
237	J21	Sample 74		N2	FAM	UNKNOWN	FAM	NFQ-MGB	No Amp	Undetermined		0				FALSE	28536.5	TRUE	3	39					39.7084	0.994257	-3.5331	91.8837	0.734267	0.0507447	FALSE
259	K19	Sample 75		N2	FAM	UNKNOWN	FAM	NFQ-MGB	No Amp	Undetermined	38.4145	0				FALSE	28536.5	TRUE	3	39					39.7084	0.994257	-3.5331	91.8837	0.734267	0.0507447	FALSE		Sample 75	Hrt	Female	1.7	9.85222	100	150	1200	3	100	16	10wk	MADKV20
260	K20	Sample 75	2.32395	N2	FAM	UNKNOWN	FAM	NFQ-MGB	Inconclusive	38.4145	38.4145	0.772391				FALSE	28536.5	TRUE	3	32					39.7084	0.994257	-3.5331	91.8837	0.734267	0.0507447	FALSE
261	K21	Sample 75		N2	FAM	UNKNOWN	FAM	NFQ-MGB	No Amp	Undetermined	38.4145	0				FALSE	28536.5	TRUE	3	39					39.7084	0.994257	-3.5331	91.8837	0.734267	0.0507447	FALSE
283	L19	Sample 76		N2	FAM	UNKNOWN	FAM	NFQ-MGB	No Amp	Undetermined		0				FALSE	28536.5	TRUE	3	39					39.7084	0.994257	-3.5331	91.8837	0.734267	0.0507447	FALSE		Sample 76	Duo	Female	1.7	0.806452	100	150	1200	3	100	13	10wk	MADKV20
284	L20	Sample 76		N2	FAM	UNKNOWN	FAM	NFQ-MGB	No Amp	Undetermined		0				FALSE	28536.5	TRUE	3	39					39.7084	0.994257	-3.5331	91.8837	0.734267	0.0507447	FALSE
285	L21	Sample 76		N2	FAM	UNKNOWN	FAM	NFQ-MGB	No Amp	Undetermined		0				FALSE	28536.5	TRUE	3	39					39.7084	0.994257	-3.5331	91.8837	0.734267	0.0507447	FALSE
307	M19	Sample 77		N2	FAM	UNKNOWN	FAM	NFQ-MGB	No Amp	Undetermined		0				FALSE	28536.5	TRUE	3	39					39.7084	0.994257	-3.5331	91.8837	0.734267	0.0507447	FALSE		Sample 77	Stom	Female	1.7	1.6129	100	150	1200	3	100	39	10wk	MADKV20
308	M20	Sample 77		N2	FAM	UNKNOWN	FAM	NFQ-MGB	No Amp	Undetermined		0				FALSE	28536.5	TRUE	3	39					39.7084	0.994257	-3.5331	91.8837	0.734267	0.0507447	FALSE
309	M21	Sample 77		N2	FAM	UNKNOWN	FAM	NFQ-MGB	No Amp	Undetermined		0				FALSE	28536.5	TRUE	3	39					39.7084	0.994257	-3.5331	91.8837	0.734267	0.0507447	FALSE
331	N19	Sample 78		N2	FAM	UNKNOWN	FAM	NFQ-MGB	No Amp	Undetermined	38.7565	0				FALSE	28536.5	TRUE	3	39					39.7084	0.994257	-3.5331	91.8837	0.734267	0.0507447	FALSE		Sample 78	Kid	Female	1.7	1.45985	100	150	1200	3	100	49	10wk	MADKV20
332	N20	Sample 78		N2	FAM	UNKNOWN	FAM	NFQ-MGB	No Amp	Undetermined	38.7565	0				FALSE	28536.5	TRUE	3	39					39.7084	0.994257	-3.5331	91.8837	0.734267	0.0507447	FALSE
333	N21	Sample 78	1.85966	N2	FAM	UNKNOWN	FAM	NFQ-MGB	Inconclusive	38.7565	38.7565	0.313505				FALSE	28536.5	TRUE	3	31					39.7084	0.994257	-3.5331	91.8837	0.734267	0.0507447	FALSE
355	O19	Sample 79	5.70911	N2	FAM	UNKNOWN	FAM	NFQ-MGB	Amp	37.0354	37.3794	0.946112	0.486518			FALSE	28536.5	TRUE	3	30					39.7084	0.994257	-3.5331	91.8837	0.734267	0.0507447	FALSE		Sample 79	Spln	Female	1.7	0.598802	100	150	1200	3	100	20	10wk	MADKV20
356	O20	Sample 79		N2	FAM	UNKNOWN	FAM	NFQ-MGB	No Amp	Undetermined	37.3794	0	0.486518			FALSE	28536.5	TRUE	3	39					39.7084	0.994257	-3.5331	91.8837	0.734267	0.0507447	FALSE
357	O21	Sample 79	3.64609	N2	FAM	UNKNOWN	FAM	NFQ-MGB	Inconclusive	37.7234	37.3794	0.93792	0.486518			FALSE	28536.5	TRUE	3	26					39.7084	0.994257	-3.5331	91.8837	0.734267	0.0507447	FALSE
22	A22	Sample 81	4616.09	N2	FAM	UNKNOWN	FAM	NFQ-MGB	Amp	26.7622	26.786	0.983193	0.121316	4554.41	355.767	FALSE	28536.5	TRUE	3	17					39.7084	0.994257	-3.5331	91.8837	0.734267	0.0507447	FALSE		Sample 81	Lvr	Female	2.7	2.89855	100	150	1200	3	100	40	10wk	MADKV20
23	A23	Sample 81	4171.84	N2	FAM	UNKNOWN	FAM	NFQ-MGB	Amp	26.9174	26.786	0.979862	0.121316	4554.41	355.767	FALSE	28536.5	TRUE	3	22					39.7084	0.994257	-3.5331	91.8837	0.734267	0.0507447	FALSE
24	A24	Sample 81	4875.31	N2	FAM	UNKNOWN	FAM	NFQ-MGB	Amp	26.6783	26.786	0.976893	0.121316	4554.41	355.767	FALSE	28536.5	TRUE	3	22					39.7084	0.994257	-3.5331	91.8837	0.734267	0.0507447	FALSE
46	B22	Sample 82		N2	FAM	UNKNOWN	FAM	NFQ-MGB	No Amp	Undetermined		0				FALSE	28536.5	TRUE	3	39					39.7084	0.994257	-3.5331	91.8837	0.734267	0.0507447	FALSE		Sample 82	Lung	Female	2.7	0.549451	100	150	1200	3	100	28	10wk	MADKV20
47	B23	Sample 82		N2	FAM	UNKNOWN	FAM	NFQ-MGB	No Amp	Undetermined		0				FALSE	28536.5	TRUE	3	39					39.7084	0.994257	-3.5331	91.8837	0.734267	0.0507447	FALSE
48	B24	Sample 82		N2	FAM	UNKNOWN	FAM	NFQ-MGB	No Amp	Undetermined		0				FALSE	28536.5	TRUE	3	39					39.7084	0.994257	-3.5331	91.8837	0.734267	0.0507447	FALSE
70	C22	Sample 83		N2	FAM	UNKNOWN	FAM	NFQ-MGB	No Amp	Undetermined		0				FALSE	28536.5	TRUE	3	39					39.7084	0.994257	-3.5331	91.8837	0.734267	0.0507447	FALSE		Sample 83	Hrt	Female	2.7	12.987	100	150	1200	3	100	23	10wk	MADKV20
71	C23	Sample 83		N2	FAM	UNKNOWN	FAM	NFQ-MGB	No Amp	Undetermined		0				FALSE	28536.5	TRUE	3	39					39.7084	0.994257	-3.5331	91.8837	0.734267	0.0507447	FALSE
72	C24	Sample 83		N2	FAM	UNKNOWN	FAM	NFQ-MGB	No Amp	Undetermined		0				FALSE	28536.5	TRUE	3	39					39.7084	0.994257	-3.5331	91.8837	0.734267	0.0507447	FALSE
94	D22	Sample 84		N2	FAM	UNKNOWN	FAM	NFQ-MGB	No Amp	Undetermined		0				FALSE	28536.5	TRUE	3	39					39.7084	0.994257	-3.5331	91.8837	0.734267	0.0507447	FALSE		Sample 84	Duo	Female	2.7	3.26264	100	150	1200	3	100	14	10wk	MADKV20
95	D23	Sample 84		N2	FAM	UNKNOWN	FAM	NFQ-MGB	No Amp	Undetermined		0				FALSE	28536.5	TRUE	3	39					39.7084	0.994257	-3.5331	91.8837	0.734267	0.0507447	FALSE
96	D24	Sample 84		N2	FAM	UNKNOWN	FAM	NFQ-MGB	No Amp	Undetermined		0				FALSE	28536.5	TRUE	3	39					39.7084	0.994257	-3.5331	91.8837	0.734267	0.0507447	FALSE
118	E22	Sample 85	2.20114	N2	FAM	UNKNOWN	FAM	NFQ-MGB	Inconclusive	38.4978	38.4978	0.584796				FALSE	28536.5	TRUE	3	30					39.7084	0.994257	-3.5331	91.8837	0.734267	0.0507447	FALSE		Sample 85	Stom	Female	2.7	2.78552	100	150	1200	3	100	22	10wk	MADKV20
119	E23	Sample 85		N2	FAM	UNKNOWN	FAM	NFQ-MGB	No Amp	Undetermined	38.4978	0				FALSE	28536.5	TRUE	3	39					39.7084	0.994257	-3.5331	91.8837	0.734267	0.0507447	FALSE
120	E24	Sample 85		N2	FAM	UNKNOWN	FAM	NFQ-MGB	No Amp	Undetermined	38.4978	0				FALSE	28536.5	TRUE	3	39					39.7084	0.994257	-3.5331	91.8837	0.734267	0.0507447	FALSE
142	F22	Sample 86		N2	FAM	UNKNOWN	FAM	NFQ-MGB	No Amp	Undetermined		0				FALSE	28536.5	TRUE	3	39					39.7084	0.994257	-3.5331	91.8837	0.734267	0.0507447	FALSE		Sample 86	Kid	Female	2.7	1.72414	100	150	1200	3	100	61	10wk	MADKV20
143	F23	Sample 86		N2	FAM	UNKNOWN	FAM	NFQ-MGB	No Amp	Undetermined		0				FALSE	28536.5	TRUE	3	39					39.7084	0.994257	-3.5331	91.8837	0.734267	0.0507447	FALSE
144	F24	Sample 86		N2	FAM	UNKNOWN	FAM	NFQ-MGB	No Amp	Undetermined		0				FALSE	28536.5	TRUE	3	39					39.7084	0.994257	-3.5331	91.8837	0.734267	0.0507447	FALSE
166	G22	Sample 87	8.01074	N2	FAM	UNKNOWN	FAM	NFQ-MGB	Amp	36.5156	37.6862	0.959027	1.22509	4.54474	3.22614	FALSE	28536.5	TRUE	3	27					39.7084	0.994257	-3.5331	91.8837	0.734267	0.0507447	FALSE		Sample 87	Spln	Female	2.7	0.819672	100	150	1200	3	100	24	10wk	MADKV20
167	G23	Sample 87	1.62932	N2	FAM	UNKNOWN	FAM	NFQ-MGB	Inconclusive	38.9594	37.6862	0.049895	1.22509	4.54474	3.22614	FALSE	28536.5	TRUE	3	34					39.7084	0.994257	-3.5331	91.8837	0.734267	0.0507447	FALSE
168	G24	Sample 87	3.99414	N2	FAM	UNKNOWN	FAM	NFQ-MGB	Amp	37.5835	37.6862	0.949485	1.22509	4.54474	3.22614	FALSE	28536.5	TRUE	3	27					39.7084	0.994257	-3.5331	91.8837	0.734267	0.0507447	FALSE
214	I22	Sample 89	1253.16	N2	FAM	UNKNOWN	FAM	NFQ-MGB	Amp	28.7628	28.8518	0.978344	0.077771	1183.62	60.7673	FALSE	28536.5	TRUE	3	20					39.7084	0.994257	-3.5331	91.8837	0.734267	0.0507447	FALSE		Sample 89	Lvr	Female	3.7	9.13242	100	150	1200	3	100	40	10wk	MADKV20
215	I23	Sample 89	1140.72	N2	FAM	UNKNOWN	FAM	NFQ-MGB	Amp	28.9071	28.8518	0.986797	0.077771	1183.62	60.7673	FALSE	28536.5	TRUE	3	21					39.7084	0.994257	-3.5331	91.8837	0.734267	0.0507447	FALSE
216	I24	Sample 89	1156.99	N2	FAM	UNKNOWN	FAM	NFQ-MGB	Amp	28.8854	28.8518	0.982218	0.077771	1183.62	60.7673	FALSE	28536.5	TRUE	3	21					39.7084	0.994257	-3.5331	91.8837	0.734267	0.0507447	FALSE
238	J22	Sample 90		N2	FAM	UNKNOWN	FAM	NFQ-MGB	No Amp	Undetermined		0				FALSE	28536.5	TRUE	3	39					39.7084	0.994257	-3.5331	91.8837	0.734267	0.0507447	FALSE		Sample 90	Lung	Female	3.7	0.588235	100	150	1200	3	100	46	10wk	MADKV20
239	J23	Sample 90		N2	FAM	UNKNOWN	FAM	NFQ-MGB	No Amp	Undetermined		0				FALSE	28536.5	TRUE	3	39					39.7084	0.994257	-3.5331	91.8837	0.734267	0.0507447	FALSE
240	J24	Sample 90		N2	FAM	UNKNOWN	FAM	NFQ-MGB	No Amp	Undetermined		0				FALSE	28536.5	TRUE	3	39					39.7084	0.994257	-3.5331	91.8837	0.734267	0.0507447	FALSE
262	K22	Sample 91		N2	FAM	UNKNOWN	FAM	NFQ-MGB	No Amp	Undetermined		0				FALSE	28536.5	TRUE	3	39					39.7084	0.994257	-3.5331	91.8837	0.734267	0.0507447	FALSE		Sample 91	Hrt	Female	3.7	9.25926	100	150	1200	3	100	26	10wk	MADKV20
263	K23	Sample 91		N2	FAM	UNKNOWN	FAM	NFQ-MGB	No Amp	Undetermined		0				FALSE	28536.5	TRUE	3	39					39.7084	0.994257	-3.5331	91.8837	0.734267	0.0507447	FALSE
264	K24	Sample 91		N2	FAM	UNKNOWN	FAM	NFQ-MGB	No Amp	Undetermined		0				FALSE	28536.5	TRUE	3	39					39.7084	0.994257	-3.5331	91.8837	0.734267	0.0507447	FALSE
286	L22	Sample 92		N2	FAM	UNKNOWN	FAM	NFQ-MGB	No Amp	Undetermined		0				FALSE	28536.5	TRUE	3	39					39.7084	0.994257	-3.5331	91.8837	0.734267	0.0507447	FALSE		Sample 92	Duo	Female	3.7	0.790514	100	150	1200	3	100	15	10wk	MADKV20
287	L23	Sample 92		N2	FAM	UNKNOWN	FAM	NFQ-MGB	No Amp	Undetermined		0				FALSE	28536.5	TRUE	3	39					39.7084	0.994257	-3.5331	91.8837	0.734267	0.0507447	FALSE
288	L24	Sample 92		N2	FAM	UNKNOWN	FAM	NFQ-MGB	No Amp	Undetermined		0				FALSE	28536.5	TRUE	3	39					39.7084	0.994257	-3.5331	91.8837	0.734267	0.0507447	FALSE
310	M22	Sample 93		N2	FAM	UNKNOWN	FAM	NFQ-MGB	No Amp	Undetermined		0				FALSE	28536.5	TRUE	3	39					39.7084	0.994257	-3.5331	91.8837	0.734267	0.0507447	FALSE		Sample 93	Stom	Female	3.7	1.12994	100	150	1200	3	100	24	10wk	MADKV20
311	M23	Sample 93		N2	FAM	UNKNOWN	FAM	NFQ-MGB	No Amp	Undetermined		0				FALSE	28536.5	TRUE	3	39					39.7084	0.994257	-3.5331	91.8837	0.734267	0.0507447	FALSE
312	M24	Sample 93		N2	FAM	UNKNOWN	FAM	NFQ-MGB	No Amp	Undetermined		0				FALSE	28536.5	TRUE	3	39					39.7084	0.994257	-3.5331	91.8837	0.734267	0.0507447	FALSE
334	N22	Sample 94		N2	FAM	UNKNOWN	FAM	NFQ-MGB	No Amp	Undetermined		0				FALSE	28536.5	TRUE	3	39					39.7084	0.994257	-3.5331	91.8837	0.734267	0.0507447	FALSE		Sample 94	Kid	Female	3.7	2.44499	100	150	1200	3	100	27	10wk	MADKV20
335	N23	Sample 94		N2	FAM	UNKNOWN	FAM	NFQ-MGB	No Amp	Undetermined		0				FALSE	28536.5	TRUE	3	39					39.7084	0.994257	-3.5331	91.8837	0.734267	0.0507447	FALSE
336	N24	Sample 94		N2	FAM	UNKNOWN	FAM	NFQ-MGB	No Amp	Undetermined		0				FALSE	28536.5	TRUE	3	39					39.7084	0.994257	-3.5331	91.8837	0.734267	0.0507447	FALSE
358	O22	Sample 95		N2	FAM	UNKNOWN	FAM	NFQ-MGB	No Amp	Undetermined	39.0827	0				FALSE	28536.5	TRUE	3	39					39.7084	0.994257	-3.5331	91.8837	0.734267	0.0507447	FALSE		Sample 95	Spln	Female	3.7	2.09424	100	150	1200	3	100	22	10wk	MADKV20
359	O23	Sample 95	1.50349	N2	FAM	UNKNOWN	FAM	NFQ-MGB	Inconclusive	39.0827	39.0827	0				FALSE	28536.5	TRUE	3	31					39.7084	0.994257	-3.5331	91.8837	0.734267	0.0507447	FALSE
360	O24	Sample 95		N2	FAM	UNKNOWN	FAM	NFQ-MGB	No Amp	Undetermined	39.0827	0				FALSE	28536.5	TRUE	3	39					39.7084	0.994257	-3.5331	91.8837	0.734267	0.0507447	FALSE
289	M1			N2	FAM	UNKNOWN	FAM	NFQ-MGB	No Amp	Undetermined		0				FALSE	28536.5	TRUE	3	39					39.7084	0.994257	-3.5331	91.8837	0.734267	0.0507447	FALSE
290	M2			N2	FAM	UNKNOWN	FAM	NFQ-MGB	No Amp	Undetermined		0				FALSE	28536.5	TRUE	3	39					39.7084	0.994257	-3.5331	91.8837	0.734267	0.0507447	FALSE
291	M3			N2	FAM	UNKNOWN	FAM	NFQ-MGB	No Amp	Undetermined		0				FALSE	28536.5	TRUE	3	39					39.7084	0.994257	-3.5331	91.8837	0.734267	0.0507447	FALSE
File Name	X:\TheLounge\Personal_Sharing Folders\Megan K\QuantStudio5 MLK\MADKV34 35 36 N2 TITER.eds
Comment
Operator	DEFAULT
Barcode
Instrument Type	QuantStudio™ 5 System
Block Type	384-Well Block
Instrument Name	Gale-Lab-QuantStudio
Instrument Serial Number	272532607
Heated Cover Serial Number
Block Serial Number	20525021
Run Start Date/Time	2022-05-18 04:06:32 PM PDT
Run End Date/Time	2022-05-18 05:42:53 PM PDT
Run Duration	96 minutes 21 seconds
Sample Volume	10.0
Cover Temperature	105.0
Passive Reference	ROX
PCR Stage/Step Number	Stage 2 Step 2
Quantification Cycle Method	CT
Analysis Date/Time	2022-05-19 03:09:49 PM PDT
Software Name and Version	Design & Analysis Software v2.5.1
Plugin Name and Version	Primary Analysis v1.6.0, Standard Curve v1.5.1
Exported On	2022-05-19 03:12:11 PM PDT
Well	Well Position	Sample	Quantity	Target	Dye	Task	Reporter	Quencher	Amp Status	Cq	Cq Mean	Cq Confidence	Cq SD	Quantity Mean	Quantity SD	Auto Threshold	Threshold	Auto Baseline	Baseline Start	Baseline End	Tm1	Tm2	Tm3	Tm4	Y-Intercept	R2	Slope	Efficiency	Standard Deviation	Standard Error	Omit	Sample	Tissue	Gender	Label	uL RNA for 200ng	uL cDNA	uL Sample input uL	Trizol/Chloroform total Volume	uL cDNA/well	uL RNA Eluted	Tissue weight mg	MADKV36
193	I1	7.5	7.5	N2	FAM	STANDARD	FAM	NFQ-MGB	Amp	37.1977	37.3742	0.890542	0.249603			FALSE	0.140703	TRUE	3	32					39.361	0.99786	-3.4699	94.1741	0.405319	0.0328032	FALSE
194	I2	7.5	7.5	N2	FAM	STANDARD	FAM	NFQ-MGB	Inconclusive	37.5507	37.3742	0.890066	0.249603			FALSE	0.140703	TRUE	3	31					39.361	0.99786	-3.4699	94.1741	0.405319	0.0328032	FALSE
169	H1	15.0	15	N2	FAM	STANDARD	FAM	NFQ-MGB	Amp	34.6374	34.7565	0.965339	0.128348			FALSE	0.140703	TRUE	3	30					39.361	0.99786	-3.4699	94.1741	0.405319	0.0328032	FALSE
170	H2	15.0	15	N2	FAM	STANDARD	FAM	NFQ-MGB	Amp	34.7397	34.7565	0.953706	0.128348			FALSE	0.140703	TRUE	3	29					39.361	0.99786	-3.4699	94.1741	0.405319	0.0328032	FALSE
171	H3	15.0	15	N2	FAM	STANDARD	FAM	NFQ-MGB	Amp	34.8924	34.7565	0.957922	0.128348			FALSE	0.140703	TRUE	3	30					39.361	0.99786	-3.4699	94.1741	0.405319	0.0328032	FALSE
145	G1	150.0	150	N2	FAM	STANDARD	FAM	NFQ-MGB	Amp	31.8735	31.8106	0.972858	0.178147			FALSE	0.140703	TRUE	3	27					39.361	0.99786	-3.4699	94.1741	0.405319	0.0328032	FALSE
146	G2	150.0	150	N2	FAM	STANDARD	FAM	NFQ-MGB	Amp	31.9488	31.8106	0.978148	0.178147			FALSE	0.140703	TRUE	3	27					39.361	0.99786	-3.4699	94.1741	0.405319	0.0328032	FALSE
147	G3	150.0	150	N2	FAM	STANDARD	FAM	NFQ-MGB	Amp	31.6096	31.8106	0.972071	0.178147			FALSE	0.140703	TRUE	3	26					39.361	0.99786	-3.4699	94.1741	0.405319	0.0328032	FALSE
121	F1	1500.0	1500	N2	FAM	STANDARD	FAM	NFQ-MGB	Amp	27.7941	28.0517	0.988734	0.234668			FALSE	0.140703	TRUE	3	21					39.361	0.99786	-3.4699	94.1741	0.405319	0.0328032	FALSE
122	F2	1500.0	1500	N2	FAM	STANDARD	FAM	NFQ-MGB	Amp	28.2532	28.0517	0.976882	0.234668			FALSE	0.140703	TRUE	3	24					39.361	0.99786	-3.4699	94.1741	0.405319	0.0328032	FALSE
123	F3	1500.0	1500	N2	FAM	STANDARD	FAM	NFQ-MGB	Amp	28.108	28.0517	0.973092	0.234668			FALSE	0.140703	TRUE	3	24					39.361	0.99786	-3.4699	94.1741	0.405319	0.0328032	FALSE
97	E1	15000.0	15000	N2	FAM	STANDARD	FAM	NFQ-MGB	Amp	24.5734	24.8251	0.984457	0.218225			FALSE	0.140703	TRUE	3	19					39.361	0.99786	-3.4699	94.1741	0.405319	0.0328032	FALSE
98	E2	15000.0	15000	N2	FAM	STANDARD	FAM	NFQ-MGB	Amp	24.9409	24.8251	0.980907	0.218225			FALSE	0.140703	TRUE	3	18					39.361	0.99786	-3.4699	94.1741	0.405319	0.0328032	FALSE
99	E3	15000.0	15000	N2	FAM	STANDARD	FAM	NFQ-MGB	Amp	24.961	24.8251	0.982176	0.218225			FALSE	0.140703	TRUE	3	21					39.361	0.99786	-3.4699	94.1741	0.405319	0.0328032	FALSE
73	D1	150000.0	150000	N2	FAM	STANDARD	FAM	NFQ-MGB	Amp	21.1746	21.4562	0.948218	0.252547			FALSE	0.140703	TRUE	3	17					39.361	0.99786	-3.4699	94.1741	0.405319	0.0328032	FALSE
74	D2	150000.0	150000	N2	FAM	STANDARD	FAM	NFQ-MGB	Amp	21.5311	21.4562	0.966504	0.252547			FALSE	0.140703	TRUE	3	17					39.361	0.99786	-3.4699	94.1741	0.405319	0.0328032	FALSE
75	D3	150000.0	150000	N2	FAM	STANDARD	FAM	NFQ-MGB	Amp	21.6628	21.4562	0.974078	0.252547			FALSE	0.140703	TRUE	3	17					39.361	0.99786	-3.4699	94.1741	0.405319	0.0328032	FALSE
49	C1	1500000.0	1500000	N2	FAM	STANDARD	FAM	NFQ-MGB	Amp	17.8941	17.9842	0.852548	0.106912			FALSE	0.140703	TRUE	3	13					39.361	0.99786	-3.4699	94.1741	0.405319	0.0328032	FALSE
50	C2	1500000.0	1500000	N2	FAM	STANDARD	FAM	NFQ-MGB	Amp	17.9562	17.9842	0.856212	0.106912			FALSE	0.140703	TRUE	3	13					39.361	0.99786	-3.4699	94.1741	0.405319	0.0328032	FALSE
51	C3	1500000.0	1500000	N2	FAM	STANDARD	FAM	NFQ-MGB	Amp	18.1023	17.9842	0.880063	0.106912			FALSE	0.140703	TRUE	3	14					39.361	0.99786	-3.4699	94.1741	0.405319	0.0328032	FALSE
25	B1	1.5E7	15000000	N2	FAM	STANDARD	FAM	NFQ-MGB	Amp	14.2732	14.3617	0.772374	0.0781701			FALSE	0.140703	TRUE	3	8					39.361	0.99786	-3.4699	94.1741	0.405319	0.0328032	FALSE
26	B2	1.5E7	15000000	N2	FAM	STANDARD	FAM	NFQ-MGB	Amp	14.3906	14.3617	0.785556	0.0781701			FALSE	0.140703	TRUE	3	8					39.361	0.99786	-3.4699	94.1741	0.405319	0.0328032	FALSE
27	B3	1.5E7	15000000	N2	FAM	STANDARD	FAM	NFQ-MGB	Amp	14.4213	14.3617	0.77328	0.0781701			FALSE	0.140703	TRUE	3	8					39.361	0.99786	-3.4699	94.1741	0.405319	0.0328032	FALSE
1	A1	1.5E8	150000000	N2	FAM	STANDARD	FAM	NFQ-MGB	Amp	11.041	11.1369	0.729997	0.107861			FALSE	0.140703	TRUE	3	6					39.361	0.99786	-3.4699	94.1741	0.405319	0.0328032	FALSE
2	A2	1.5E8	150000000	N2	FAM	STANDARD	FAM	NFQ-MGB	Amp	11.2537	11.1369	0.725723	0.107861			FALSE	0.140703	TRUE	3	7					39.361	0.99786	-3.4699	94.1741	0.405319	0.0328032	FALSE
3	A3	1.5E8	150000000	N2	FAM	STANDARD	FAM	NFQ-MGB	Amp	11.116	11.1369	0.743551	0.107861			FALSE	0.140703	TRUE	3	7					39.361	0.99786	-3.4699	94.1741	0.405319	0.0328032	FALSE
301	M13	Sample 45		N2	FAM	UNKNOWN	FAM	NFQ-MGB	No Amp	Undetermined		0				FALSE	0.140703	TRUE	3	39					39.361	0.99786	-3.4699	94.1741	0.405319	0.0328032	FALSE	Sample 45	Lung	Male	1M	2.44117	100	150	1200	3	70	22	MADKV36
302	M14	Sample 45		N2	FAM	UNKNOWN	FAM	NFQ-MGB	No Amp	Undetermined		0				FALSE	0.140703	TRUE	3	39					39.361	0.99786	-3.4699	94.1741	0.405319	0.0328032	FALSE
303	M15	Sample 45		N2	FAM	UNKNOWN	FAM	NFQ-MGB	No Amp	Undetermined		0				FALSE	0.140703	TRUE	3	39					39.361	0.99786	-3.4699	94.1741	0.405319	0.0328032	FALSE
325	N13	Sample 46		N2	FAM	UNKNOWN	FAM	NFQ-MGB	No Amp	Undetermined	37.1276	0				FALSE	0.140703	TRUE	3	39					39.361	0.99786	-3.4699	94.1741	0.405319	0.0328032	FALSE	Sample 46	Lung	Male	2M	2.52819	100	150	1200	3	70	23	MADKV36
326	N14	Sample 46	4.40205	N2	FAM	UNKNOWN	FAM	NFQ-MGB	Inconclusive	37.1276	37.1276	0.924413				FALSE	0.140703	TRUE	3	32					39.361	0.99786	-3.4699	94.1741	0.405319	0.0328032	FALSE
327	N15	Sample 46		N2	FAM	UNKNOWN	FAM	NFQ-MGB	No Amp	Undetermined	37.1276	0				FALSE	0.140703	TRUE	3	39					39.361	0.99786	-3.4699	94.1741	0.405319	0.0328032	FALSE
349	O13	Sample 47	4.9277	N2	FAM	UNKNOWN	FAM	NFQ-MGB	Amp	36.9576	37.107	0.959383	0.951065	5.04526	2.83339	FALSE	0.140703	TRUE	3	30					39.361	0.99786	-3.4699	94.1741	0.405319	0.0328032	FALSE	Sample 47	Lung	Male	3M	2.32905	100	150	1200	3	70	23	MADKV36
350	O14	Sample 47	2.27248	N2	FAM	UNKNOWN	FAM	NFQ-MGB	Inconclusive	38.124	37.107	0.936901	0.951065	5.04526	2.83339	FALSE	0.140703	TRUE	3	32					39.361	0.99786	-3.4699	94.1741	0.405319	0.0328032	FALSE
351	O15	Sample 47	7.9356	N2	FAM	UNKNOWN	FAM	NFQ-MGB	Amp	36.2395	37.107	0.955799	0.951065	5.04526	2.83339	FALSE	0.140703	TRUE	3	31					39.361	0.99786	-3.4699	94.1741	0.405319	0.0328032	FALSE
373	P13	Sample 48	9.15079e+06	N2	FAM	UNKNOWN	FAM	NFQ-MGB	Amp	15.2054	15.1683	0.826798	0.0370953	9.38082e+06	230898	FALSE	0.140703	TRUE	3	11					39.361	0.99786	-3.4699	94.1741	0.405319	0.0328032	FALSE	Sample 48	Lung	Male	1.2	2.18991	100	150	1200	3	70	23	MADKV36
374	P14	Sample 48	9.37909e+06	N2	FAM	UNKNOWN	FAM	NFQ-MGB	Amp	15.1683	15.1683	0.841416	0.0370953	9.38082e+06	230898	FALSE	0.140703	TRUE	3	10					39.361	0.99786	-3.4699	94.1741	0.405319	0.0328032	FALSE
375	P15	Sample 48	9.61258e+06	N2	FAM	UNKNOWN	FAM	NFQ-MGB	Amp	15.1312	15.1683	0.83114	0.0370953	9.38082e+06	230898	FALSE	0.140703	TRUE	3	11					39.361	0.99786	-3.4699	94.1741	0.405319	0.0328032	FALSE
16	A16	Sample 49	7.67277e+06	N2	FAM	UNKNOWN	FAM	NFQ-MGB	Amp	15.4709	15.6688	0.806576	0.175556	6.75965e+06	806711	FALSE	0.140703	TRUE	3	10					39.361	0.99786	-3.4699	94.1741	0.405319	0.0328032	FALSE	Sample 49	Lung	Male	2.2	2.27902	100	150	1200	3	70	30	MADKV36
17	A17	Sample 49	6.46261e+06	N2	FAM	UNKNOWN	FAM	NFQ-MGB	Amp	15.7296	15.6688	0.833414	0.175556	6.75965e+06	806711	FALSE	0.140703	TRUE	3	11					39.361	0.99786	-3.4699	94.1741	0.405319	0.0328032	FALSE
18	A18	Sample 49	6.14357e+06	N2	FAM	UNKNOWN	FAM	NFQ-MGB	Amp	15.8059	15.6688	0.845305	0.175556	6.75965e+06	806711	FALSE	0.140703	TRUE	3	11					39.361	0.99786	-3.4699	94.1741	0.405319	0.0328032	FALSE
40	B16	Sample 50	77998.9	N2	FAM	UNKNOWN	FAM	NFQ-MGB	Amp	22.3859	22.3203	0.983234	0.0634931	81520.7	3426.18	FALSE	0.140703	TRUE	3	18					39.361	0.99786	-3.4699	94.1741	0.405319	0.0328032	FALSE	Sample 50	Lung	Male	1.4	0.937264	100	150	1200	3	70	22	MADKV36
41	B17	Sample 50	84842.5	N2	FAM	UNKNOWN	FAM	NFQ-MGB	Amp	22.2592	22.3203	0.98678	0.0634931	81520.7	3426.18	FALSE	0.140703	TRUE	3	18					39.361	0.99786	-3.4699	94.1741	0.405319	0.0328032	FALSE
42	B18	Sample 50	81720.6	N2	FAM	UNKNOWN	FAM	NFQ-MGB	Amp	22.3157	22.3203	0.980056	0.0634931	81520.7	3426.18	FALSE	0.140703	TRUE	3	17					39.361	0.99786	-3.4699	94.1741	0.405319	0.0328032	FALSE
64	C16	Sample 51	49091.9	N2	FAM	UNKNOWN	FAM	NFQ-MGB	Amp	23.0837	23.0329	0.981707	0.0557523	50797.1	1887.09	FALSE	0.140703	TRUE	3	18					39.361	0.99786	-3.4699	94.1741	0.405319	0.0328032	FALSE	Sample 51	Lung	Male	2.4	1.34718	100	150	1200	3	70	32	MADKV36
65	C17	Sample 51	50474.8	N2	FAM	UNKNOWN	FAM	NFQ-MGB	Amp	23.0418	23.0329	0.988469	0.0557523	50797.1	1887.09	FALSE	0.140703	TRUE	3	18					39.361	0.99786	-3.4699	94.1741	0.405319	0.0328032	FALSE
66	C18	Sample 51	52824.5	N2	FAM	UNKNOWN	FAM	NFQ-MGB	Amp	22.9732	23.0329	0.987044	0.0557523	50797.1	1887.09	FALSE	0.140703	TRUE	3	17					39.361	0.99786	-3.4699	94.1741	0.405319	0.0328032	FALSE
88	D16	Sample 52	104340	N2	FAM	UNKNOWN	FAM	NFQ-MGB	Amp	21.9475	21.903	0.987993	0.0533356	107508	3830.04	FALSE	0.140703	TRUE	3	16					39.361	0.99786	-3.4699	94.1741	0.405319	0.0328032	FALSE	Sample 52	Lung	Male	3.4	1.49135	100	150	1200	3	70	22	MADKV36
89	D17	Sample 52	106421	N2	FAM	UNKNOWN	FAM	NFQ-MGB	Amp	21.9177	21.903	0.988991	0.0533356	107508	3830.04	FALSE	0.140703	TRUE	3	17					39.361	0.99786	-3.4699	94.1741	0.405319	0.0328032	FALSE
90	D18	Sample 52	111765	N2	FAM	UNKNOWN	FAM	NFQ-MGB	Amp	21.8439	21.903	0.98586	0.0533356	107508	3830.04	FALSE	0.140703	TRUE	3	16					39.361	0.99786	-3.4699	94.1741	0.405319	0.0328032	FALSE
112	E16	Sample 53	324.858	N2	FAM	UNKNOWN	FAM	NFQ-MGB	Amp	30.6457	30.5641	0.969915	0.127022	343.759	29.6306	FALSE	0.140703	TRUE	3	25					39.361	0.99786	-3.4699	94.1741	0.405319	0.0328032	FALSE	Sample 53	Lung	Male	1.7	4.45018	100	150	1200	3	70	12	MADKV36
113	E17	Sample 53	377.909	N2	FAM	UNKNOWN	FAM	NFQ-MGB	Amp	30.4177	30.5641	0.982469	0.127022	343.759	29.6306	FALSE	0.140703	TRUE	3	26					39.361	0.99786	-3.4699	94.1741	0.405319	0.0328032	FALSE
114	E18	Sample 53	328.511	N2	FAM	UNKNOWN	FAM	NFQ-MGB	Amp	30.6288	30.5641	0.974333	0.127022	343.759	29.6306	FALSE	0.140703	TRUE	3	26					39.361	0.99786	-3.4699	94.1741	0.405319	0.0328032	FALSE
136	F16	Sample 54	2955.35	N2	FAM	UNKNOWN	FAM	NFQ-MGB	Amp	27.3183	27.2592	0.985314	0.0663217	3075.58	136.139	FALSE	0.140703	TRUE	3	23					39.361	0.99786	-3.4699	94.1741	0.405319	0.0328032	FALSE	Sample 54	Lung	Male	2.7	1.19148	100	150	1200	3	70	31	MADKV36
137	F17	Sample 54	3048	N2	FAM	UNKNOWN	FAM	NFQ-MGB	Amp	27.2718	27.2592	0.982722	0.0663217	3075.58	136.139	FALSE	0.140703	TRUE	3	22					39.361	0.99786	-3.4699	94.1741	0.405319	0.0328032	FALSE
138	F18	Sample 54	3223.4	N2	FAM	UNKNOWN	FAM	NFQ-MGB	Amp	27.1875	27.2592	0.979455	0.0663217	3075.58	136.139	FALSE	0.140703	TRUE	3	22					39.361	0.99786	-3.4699	94.1741	0.405319	0.0328032	FALSE
160	G16	Sample 55	1638.98	N2	FAM	UNKNOWN	FAM	NFQ-MGB	Amp	28.2068	28.2026	0.981316	0.114131	1646.68	124.882	FALSE	0.140703	TRUE	3	24					39.361	0.99786	-3.4699	94.1741	0.405319	0.0328032	FALSE	Sample 55	Lung	Male	3.7	1.2392	100	150	1200	3	70	30	MADKV36
161	G17	Sample 55	1775.24	N2	FAM	UNKNOWN	FAM	NFQ-MGB	Amp	28.0864	28.2026	0.982755	0.114131	1646.68	124.882	FALSE	0.140703	TRUE	3	22					39.361	0.99786	-3.4699	94.1741	0.405319	0.0328032	FALSE
162	G18	Sample 55	1525.83	N2	FAM	UNKNOWN	FAM	NFQ-MGB	Amp	28.3145	28.2026	0.975488	0.114131	1646.68	124.882	FALSE	0.140703	TRUE	3	23					39.361	0.99786	-3.4699	94.1741	0.405319	0.0328032	FALSE
184	H16	Sample 56		N2	FAM	UNKNOWN	FAM	NFQ-MGB	No Amp	Undetermined	37.5716	0				FALSE	0.140703	TRUE	3	39					39.361	0.99786	-3.4699	94.1741	0.405319	0.0328032	FALSE	Sample 56	Lung	Female	1M	1.87254	100	150	1200	3	70	28	MADKV36
185	H17	Sample 56	3.27868	N2	FAM	UNKNOWN	FAM	NFQ-MGB	Inconclusive	37.5716	37.5716	0.905807				FALSE	0.140703	TRUE	3	33					39.361	0.99786	-3.4699	94.1741	0.405319	0.0328032	FALSE
186	H18	Sample 56		N2	FAM	UNKNOWN	FAM	NFQ-MGB	No Amp	Undetermined	37.5716	0				FALSE	0.140703	TRUE	3	39					39.361	0.99786	-3.4699	94.1741	0.405319	0.0328032	FALSE
208	I16	Sample 57	2.83028e+06	N2	FAM	UNKNOWN	FAM	NFQ-MGB	Amp	16.9738	16.9836	0.877767	0.014307	2.81196e+06	26627.4	FALSE	0.140703	TRUE	3	11					39.361	0.99786	-3.4699	94.1741	0.405319	0.0328032	FALSE	Sample 57	Lung	Female	2.2	2.88214	100	150	1200	3	70	26	MADKV36
209	I17	Sample 57	2.78142e+06	N2	FAM	UNKNOWN	FAM	NFQ-MGB	Amp	17	16.9836	0.885111	0.014307	2.81196e+06	26627.4	FALSE	0.140703	TRUE	3	13					39.361	0.99786	-3.4699	94.1741	0.405319	0.0328032	FALSE
210	I18	Sample 57	2.82418e+06	N2	FAM	UNKNOWN	FAM	NFQ-MGB	Amp	16.977	16.9836	0.875969	0.014307	2.81196e+06	26627.4	FALSE	0.140703	TRUE	3	12					39.361	0.99786	-3.4699	94.1741	0.405319	0.0328032	FALSE
232	J16	Sample 58	3.316e+06	N2	FAM	UNKNOWN	FAM	NFQ-MGB	Amp	16.7351	16.8405	0.861583	0.126197	3.09919e+06	255167	FALSE	0.140703	TRUE	3	11					39.361	0.99786	-3.4699	94.1741	0.405319	0.0328032	FALSE	Sample 58	Lung	Female	1.2	1.78819	100	150	1200	3	70	17	MADKV36
233	J17	Sample 58	3.16357e+06	N2	FAM	UNKNOWN	FAM	NFQ-MGB	Amp	16.806	16.8405	0.867548	0.126197	3.09919e+06	255167	FALSE	0.140703	TRUE	3	12					39.361	0.99786	-3.4699	94.1741	0.405319	0.0328032	FALSE
234	J18	Sample 58	2.818e+06	N2	FAM	UNKNOWN	FAM	NFQ-MGB	Amp	16.9803	16.8405	0.874045	0.126197	3.09919e+06	255167	FALSE	0.140703	TRUE	3	11					39.361	0.99786	-3.4699	94.1741	0.405319	0.0328032	FALSE
256	K16	Sample 59	64.8102	N2	FAM	UNKNOWN	FAM	NFQ-MGB	Amp	33.0748	32.7672	0.968884	0.393976	81.3812	22.2931	FALSE	0.140703	TRUE	3	27					39.361	0.99786	-3.4699	94.1741	0.405319	0.0328032	FALSE	Sample 59	Lung	Female	3M	3.02663	100	150	1200	3	70	24	MADKV36
257	K17	Sample 59	72.6069	N2	FAM	UNKNOWN	FAM	NFQ-MGB	Amp	32.9036	32.7672	0.962957	0.393976	81.3812	22.2931	FALSE	0.140703	TRUE	3	28					39.361	0.99786	-3.4699	94.1741	0.405319	0.0328032	FALSE
258	K18	Sample 59	106.726	N2	FAM	UNKNOWN	FAM	NFQ-MGB	Amp	32.3231	32.7672	0.973732	0.393976	81.3812	22.2931	FALSE	0.140703	TRUE	3	28					39.361	0.99786	-3.4699	94.1741	0.405319	0.0328032	FALSE
280	L16	Sample 60		N2	FAM	UNKNOWN	FAM	NFQ-MGB	No Amp	Undetermined		0				FALSE	0.140703	TRUE	3	39					39.361	0.99786	-3.4699	94.1741	0.405319	0.0328032	FALSE	Sample 60	Lung	Female	2M	2.47721	100	150	1200	3	70	16	MADKV36
281	L17	Sample 60		N2	FAM	UNKNOWN	FAM	NFQ-MGB	No Amp	Undetermined		0				FALSE	0.140703	TRUE	3	39					39.361	0.99786	-3.4699	94.1741	0.405319	0.0328032	FALSE
282	L18	Sample 60		N2	FAM	UNKNOWN	FAM	NFQ-MGB	No Amp	Undetermined		0				FALSE	0.140703	TRUE	3	39					39.361	0.99786	-3.4699	94.1741	0.405319	0.0328032	FALSE
304	M16	Sample 61	4.62504e+06	N2	FAM	UNKNOWN	FAM	NFQ-MGB	Amp	16.2337	16.1287	0.848462	0.111537	4.96796e+06	369620	FALSE	0.140703	TRUE	3	12					39.361	0.99786	-3.4699	94.1741	0.405319	0.0328032	FALSE	Sample 61	Lung	Female	3.2	2.77998	100	150	1200	3	70	17	MADKV36
305	M17	Sample 61	5.35947e+06	N2	FAM	UNKNOWN	FAM	NFQ-MGB	Amp	16.0116	16.1287	0.83552	0.111537	4.96796e+06	369620	FALSE	0.140703	TRUE	3	10					39.361	0.99786	-3.4699	94.1741	0.405319	0.0328032	FALSE
306	M18	Sample 61	4.91935e+06	N2	FAM	UNKNOWN	FAM	NFQ-MGB	Amp	16.1407	16.1287	0.831343	0.111537	4.96796e+06	369620	FALSE	0.140703	TRUE	3	11					39.361	0.99786	-3.4699	94.1741	0.405319	0.0328032	FALSE
328	N16	Sample 62	33585.8	N2	FAM	UNKNOWN	FAM	NFQ-MGB	Amp	23.6557	23.5357	0.987628	0.104261	36427.5	2469.45	FALSE	0.140703	TRUE	3	18					39.361	0.99786	-3.4699	94.1741	0.405319	0.0328032	FALSE	Sample 62	Lung	Female	1.4	1.58687	100	150	1200	3	70	23	MADKV36
329	N17	Sample 62	38052.9	N2	FAM	UNKNOWN	FAM	NFQ-MGB	Amp	23.4675	23.5357	0.989822	0.104261	36427.5	2469.45	FALSE	0.140703	TRUE	3	19					39.361	0.99786	-3.4699	94.1741	0.405319	0.0328032	FALSE
330	N18	Sample 62	37643.9	N2	FAM	UNKNOWN	FAM	NFQ-MGB	Amp	23.4838	23.5357	0.990351	0.104261	36427.5	2469.45	FALSE	0.140703	TRUE	3	18					39.361	0.99786	-3.4699	94.1741	0.405319	0.0328032	FALSE
352	O16	Sample 63	58817.8	N2	FAM	UNKNOWN	FAM	NFQ-MGB	Amp	22.8113	22.8236	0.989521	0.144641	58517.5	5576.01	FALSE	0.140703	TRUE	3	18					39.361	0.99786	-3.4699	94.1741	0.405319	0.0328032	FALSE	Sample 63	Lung	Female	2.4	1.51105	100	150	1200	3	70	28	MADKV36
353	O17	Sample 63	63937.2	N2	FAM	UNKNOWN	FAM	NFQ-MGB	Amp	22.6855	22.8236	0.991102	0.144641	58517.5	5576.01	FALSE	0.140703	TRUE	3	18					39.361	0.99786	-3.4699	94.1741	0.405319	0.0328032	FALSE
354	O18	Sample 63	52797.3	N2	FAM	UNKNOWN	FAM	NFQ-MGB	Amp	22.974	22.8236	0.986366	0.144641	58517.5	5576.01	FALSE	0.140703	TRUE	3	19					39.361	0.99786	-3.4699	94.1741	0.405319	0.0328032	FALSE
376	P16	Sample 64	94838.9	N2	FAM	UNKNOWN	FAM	NFQ-MGB	Amp	22.0914	21.9891	0.989589	0.0900782	101614	5981.93	FALSE	0.140703	TRUE	3	18					39.361	0.99786	-3.4699	94.1741	0.405319	0.0328032	FALSE	Sample 64	Lung	Female	3.4	1.31778	100	150	1200	3	70	27	MADKV36
377	P17	Sample 64	106166	N2	FAM	UNKNOWN	FAM	NFQ-MGB	Amp	21.9213	21.9891	0.994526	0.0900782	101614	5981.93	FALSE	0.140703	TRUE	3	17					39.361	0.99786	-3.4699	94.1741	0.405319	0.0328032	FALSE
378	P18	Sample 64	103838	N2	FAM	UNKNOWN	FAM	NFQ-MGB	Amp	21.9547	21.9891	0.98979	0.0900782	101614	5981.93	FALSE	0.140703	TRUE	3	17					39.361	0.99786	-3.4699	94.1741	0.405319	0.0328032	FALSE
19	A19	Sample 65	728.51	N2	FAM	UNKNOWN	FAM	NFQ-MGB	Amp	29.4286	29.5189	0.984105	0.14558	688.238	64.5532	FALSE	0.140703	TRUE	3	25					39.361	0.99786	-3.4699	94.1741	0.405319	0.0328032	FALSE	Sample 65	Lung	Female	1.7	1.99021	100	150	1200	3	70	14	MADKV36
20	A20	Sample 65	722.423	N2	FAM	UNKNOWN	FAM	NFQ-MGB	Amp	29.4413	29.5189	0.984654	0.14558	688.238	64.5532	FALSE	0.140703	TRUE	3	25					39.361	0.99786	-3.4699	94.1741	0.405319	0.0328032	FALSE
21	A21	Sample 65	613.781	N2	FAM	UNKNOWN	FAM	NFQ-MGB	Amp	29.6869	29.5189	0.977142	0.14558	688.238	64.5532	FALSE	0.140703	TRUE	3	25					39.361	0.99786	-3.4699	94.1741	0.405319	0.0328032	FALSE
43	B19	Sample 66	815.057	N2	FAM	UNKNOWN	FAM	NFQ-MGB	Amp	29.2595	29.078	0.979874	0.268308	929.447	172.634	FALSE	0.140703	TRUE	3	24					39.361	0.99786	-3.4699	94.1741	0.405319	0.0328032	FALSE	Sample 66	Lung	Female	2.7	1.28093	100	150	1200	3	70	27	MADKV36
44	B20	Sample 66	1128.02	N2	FAM	UNKNOWN	FAM	NFQ-MGB	Amp	28.7698	29.078	0.983778	0.268308	929.447	172.634	FALSE	0.140703	TRUE	3	24					39.361	0.99786	-3.4699	94.1741	0.405319	0.0328032	FALSE
45	B21	Sample 66	845.26	N2	FAM	UNKNOWN	FAM	NFQ-MGB	Amp	29.2046	29.078	0.980529	0.268308	929.447	172.634	FALSE	0.140703	TRUE	3	23					39.361	0.99786	-3.4699	94.1741	0.405319	0.0328032	FALSE
67	C19	Sample 67	1041.81	N2	FAM	UNKNOWN	FAM	NFQ-MGB	Amp	28.8896	28.9693	0.985506	0.277397	999.069	176.417	FALSE	0.140703	TRUE	3	25					39.361	0.99786	-3.4699	94.1741	0.405319	0.0328032	FALSE	Sample 67	Lung	Female	3.7	1.44207	100	150	1200	3	70	22	MADKV36
68	C20	Sample 67	1150.19	N2	FAM	UNKNOWN	FAM	NFQ-MGB	Amp	28.7404	28.9693	0.984928	0.277397	999.069	176.417	FALSE	0.140703	TRUE	3	24					39.361	0.99786	-3.4699	94.1741	0.405319	0.0328032	FALSE
69	C21	Sample 67	805.21	N2	FAM	UNKNOWN	FAM	NFQ-MGB	Amp	29.2778	28.9693	0.833441	0.277397	999.069	176.417	FALSE	0.140703	TRUE	3	23					39.361	0.99786	-3.4699	94.1741	0.405319	0.0328032	FALSE
289	M1			N2	FAM	NTC	FAM	NFQ-MGB	No Amp	Undetermined	37.3455	0	1.30099			FALSE	0.140703	TRUE	3	39					39.361	0.99786	-3.4699	94.1741	0.405319	0.0328032	FALSE
290	M2			N2	FAM	NTC	FAM	NFQ-MGB	No Amp	Undetermined	37.3455	0	1.30099			FALSE	0.140703	TRUE	3	39					39.361	0.99786	-3.4699	94.1741	0.405319	0.0328032	FALSE
291	M3			N2	FAM	NTC	FAM	NFQ-MGB	No Amp	Undetermined	37.3455	0	1.30099			FALSE	0.140703	TRUE	3	39					39.361	0.99786	-3.4699	94.1741	0.405319	0.0328032	FALSE

## Sheet: CT for 20 wk R2G
File Name	X:\TheLounge\Personal_Sharing Folders\Megan K\QuantStudio5\MADKV21M N2 TITER.eds
Comment
Operator	DEFAULT
Barcode
Instrument Type	QuantStudio™ 5 System
Block Type	384-Well Block
Instrument Name	Gale-Lab-QuantStudio
Instrument Serial Number	272532607
Heated Cover Serial Number
Block Serial Number	20525021
Run Start Date/Time	2022-02-11 01:41:33 PM PST
Run End Date/Time	2022-02-11 03:15:47 PM PST
Run Duration	94 minutes 13 seconds
Sample Volume	10.0
Cover Temperature	105.0
Passive Reference	NONE
PCR Stage/Step Number	Stage 2 Step 2
Quantification Cycle Method	CT
Analysis Date/Time	2022-02-11 03:27:36 PM PST
Software Name and Version	Design & Analysis Software v2.5.1
Plugin Name and Version	Primary Analysis v1.6.0, Standard Curve v1.5.1
Exported On	2022-02-11 03:27:54 PM PST
Well	Well Position	Sample	Quantity	Target	Dye	Task	Reporter	Quencher	Amp Status	Cq	Cq Mean	Cq Confidence	Cq SD	Quantity Mean	Quantity SD	Auto Threshold	Threshold	Auto Baseline	Baseline Start	Baseline End	Tm1	Tm2	Tm3	Tm4	Y-Intercept	R2	Slope	Efficiency	Standard Deviation	Standard Error	Omit		Sample	Tissue	Gender	Label	uL RNA for 200ng	uL cDNA	uL Sample input uL	Trizol/Chloroform total Volume	uL cDNA/well	uL RNA eluted	Tissue weight mg	MADKV21
265	L1	0.9375	0.9375	N2	FAM	STANDARD	FAM	NFQ-MGB	No Amp	Undetermined	38.8304	0				FALSE	44574.3	TRUE	3	39					41.3349	0.994154	-3.6398	88.2523	0.739349	0.055821	FALSE
266	L2	0.9375	0.9375	N2	FAM	STANDARD	FAM	NFQ-MGB	No Amp	Undetermined	38.8304	0				FALSE	44574.3	TRUE	3	39					41.3349	0.994154	-3.6398	88.2523	0.739349	0.055821	FALSE
267	L3	0.9375	0.9375	N2	FAM	STANDARD	FAM	NFQ-MGB	Inconclusive	38.8304	38.8304	0.176831				FALSE	44574.3	TRUE	3	31					41.3349	0.994154	-3.6398	88.2523	0.739349	0.055821	FALSE
241	K1	1.875	1.875	N2	FAM	STANDARD	FAM	NFQ-MGB	No Amp	Undetermined		0				FALSE	44574.3	TRUE	3	39					41.3349	0.994154	-3.6398	88.2523	0.739349	0.055821	FALSE
242	K2	1.875	1.875	N2	FAM	STANDARD	FAM	NFQ-MGB	No Amp	Undetermined		0				FALSE	44574.3	TRUE	3	30					41.3349	0.994154	-3.6398	88.2523	0.739349	0.055821	FALSE
243	K3	1.875	1.875	N2	FAM	STANDARD	FAM	NFQ-MGB	No Amp	Undetermined		0				FALSE	44574.3	TRUE	3	32					41.3349	0.994154	-3.6398	88.2523	0.739349	0.055821	FALSE
217	J1	3.75	3.75	N2	FAM	STANDARD	FAM	NFQ-MGB	No Amp	Undetermined	38.1152	0				FALSE	44574.3	TRUE	3	39					41.3349	0.994154	-3.6398	88.2523	0.739349	0.055821	FALSE
218	J2	3.75	3.75	N2	FAM	STANDARD	FAM	NFQ-MGB	No Amp	Undetermined	38.1152	0				FALSE	44574.3	TRUE	3	39					41.3349	0.994154	-3.6398	88.2523	0.739349	0.055821	FALSE
219	J3	3.75	3.75	N2	FAM	STANDARD	FAM	NFQ-MGB	Inconclusive	38.1152	38.1152	0.818315				FALSE	44574.3	TRUE	3	30					41.3349	0.994154	-3.6398	88.2523	0.739349	0.055821	FALSE
193	I1	7.5	7.5	N2	FAM	STANDARD	FAM	NFQ-MGB	Amp	38.0759	38.8019	0.848701	1.02669			FALSE	44574.3	TRUE	3	30					41.3349	0.994154	-3.6398	88.2523	0.739349	0.055821	FALSE
194	I2	7.5	7.5	N2	FAM	STANDARD	FAM	NFQ-MGB	Inconclusive	39.5279	38.8019	0	1.02669			FALSE	44574.3	TRUE	3	30					41.3349	0.994154	-3.6398	88.2523	0.739349	0.055821	FALSE
195	I3	7.5	7.5	N2	FAM	STANDARD	FAM	NFQ-MGB	No Amp	Undetermined	38.8019	0	1.02669			FALSE	44574.3	TRUE	3	39					41.3349	0.994154	-3.6398	88.2523	0.739349	0.055821	FALSE
169	H1	15.0	15	N2	FAM	STANDARD	FAM	NFQ-MGB	Inconclusive	38.6281	37.819	0.369902	1.14424			FALSE	44574.3	TRUE	3	29					41.3349	0.994154	-3.6398	88.2523	0.739349	0.055821	FALSE
170	H2	15.0	15	N2	FAM	STANDARD	FAM	NFQ-MGB	Amp	37.0099	37.819	0.945864	1.14424			FALSE	44574.3	TRUE	3	29					41.3349	0.994154	-3.6398	88.2523	0.739349	0.055821	FALSE
171	H3	15.0	15	N2	FAM	STANDARD	FAM	NFQ-MGB	No Amp	Undetermined	37.819	0	1.14424			FALSE	44574.3	TRUE	3	29					41.3349	0.994154	-3.6398	88.2523	0.739349	0.055821	FALSE
145	G1	150.0	150	N2	FAM	STANDARD	FAM	NFQ-MGB	Amp	33.6988	33.5224	0.964931	0.231902			FALSE	44574.3	TRUE	3	26					41.3349	0.994154	-3.6398	88.2523	0.739349	0.055821	FALSE
146	G2	150.0	150	N2	FAM	STANDARD	FAM	NFQ-MGB	Amp	33.2597	33.5224	0.968775	0.231902			FALSE	44574.3	TRUE	3	23					41.3349	0.994154	-3.6398	88.2523	0.739349	0.055821	FALSE
147	G3	150.0	150	N2	FAM	STANDARD	FAM	NFQ-MGB	Amp	33.6086	33.5224	0.957496	0.231902			FALSE	44574.3	TRUE	3	25					41.3349	0.994154	-3.6398	88.2523	0.739349	0.055821	FALSE
121	F1	1500.0	1500	N2	FAM	STANDARD	FAM	NFQ-MGB	Amp	29.9969	29.9854	0.98137	0.0223454			FALSE	44574.3	TRUE	3	24					41.3349	0.994154	-3.6398	88.2523	0.739349	0.055821	FALSE
122	F2	1500.0	1500	N2	FAM	STANDARD	FAM	NFQ-MGB	Amp	29.9597	29.9854	0.96491	0.0223454			FALSE	44574.3	TRUE	3	21					41.3349	0.994154	-3.6398	88.2523	0.739349	0.055821	FALSE
123	F3	1500.0	1500	N2	FAM	STANDARD	FAM	NFQ-MGB	Amp	29.9997	29.9854	0.972225	0.0223454			FALSE	44574.3	TRUE	3	21					41.3349	0.994154	-3.6398	88.2523	0.739349	0.055821	FALSE
97	E1	15000.0	15000	N2	FAM	STANDARD	FAM	NFQ-MGB	Amp	26.2313	26.3347	0.976083	0.107772			FALSE	44574.3	TRUE	3	17					41.3349	0.994154	-3.6398	88.2523	0.739349	0.055821	FALSE
98	E2	15000.0	15000	N2	FAM	STANDARD	FAM	NFQ-MGB	Amp	26.4464	26.3347	0.981379	0.107772			FALSE	44574.3	TRUE	3	20					41.3349	0.994154	-3.6398	88.2523	0.739349	0.055821	FALSE
99	E3	15000.0	15000	N2	FAM	STANDARD	FAM	NFQ-MGB	Amp	26.3265	26.3347	0.980515	0.107772			FALSE	44574.3	TRUE	3	18					41.3349	0.994154	-3.6398	88.2523	0.739349	0.055821	FALSE
73	D1	150000.0	150000	N2	FAM	STANDARD	FAM	NFQ-MGB	Amp	22.7806	22.7343	0.973331	0.0619315			FALSE	44574.3	TRUE	3	16					41.3349	0.994154	-3.6398	88.2523	0.739349	0.055821	FALSE
74	D2	150000.0	150000	N2	FAM	STANDARD	FAM	NFQ-MGB	Amp	22.6639	22.7343	0.982263	0.0619315			FALSE	44574.3	TRUE	3	16					41.3349	0.994154	-3.6398	88.2523	0.739349	0.055821	FALSE
75	D3	150000.0	150000	N2	FAM	STANDARD	FAM	NFQ-MGB	Amp	22.7583	22.7343	0.973197	0.0619315			FALSE	44574.3	TRUE	3	15					41.3349	0.994154	-3.6398	88.2523	0.739349	0.055821	FALSE
49	C1	1500000.0	1500000	N2	FAM	STANDARD	FAM	NFQ-MGB	Amp	18.9805	18.9438	0.9753	0.0360027			FALSE	44574.3	TRUE	3	12					41.3349	0.994154	-3.6398	88.2523	0.739349	0.055821	FALSE
50	C2	1500000.0	1500000	N2	FAM	STANDARD	FAM	NFQ-MGB	Amp	18.9424	18.9438	0.978076	0.0360027			FALSE	44574.3	TRUE	3	13					41.3349	0.994154	-3.6398	88.2523	0.739349	0.055821	FALSE
51	C3	1500000.0	1500000	N2	FAM	STANDARD	FAM	NFQ-MGB	Amp	18.9086	18.9438	0.97503	0.0360027			FALSE	44574.3	TRUE	3	13					41.3349	0.994154	-3.6398	88.2523	0.739349	0.055821	FALSE
25	B1	1.5E7	15000000	N2	FAM	STANDARD	FAM	NFQ-MGB	Amp	14.9006	15.0663	0.918658	0.146632			FALSE	44574.3	TRUE	3	7					41.3349	0.994154	-3.6398	88.2523	0.739349	0.055821	FALSE
26	B2	1.5E7	15000000	N2	FAM	STANDARD	FAM	NFQ-MGB	Amp	15.1793	15.0663	0.935538	0.146632			FALSE	44574.3	TRUE	3	9					41.3349	0.994154	-3.6398	88.2523	0.739349	0.055821	FALSE
27	B3	1.5E7	15000000	N2	FAM	STANDARD	FAM	NFQ-MGB	Amp	15.1189	15.0663	0.947183	0.146632			FALSE	44574.3	TRUE	3	7					41.3349	0.994154	-3.6398	88.2523	0.739349	0.055821	FALSE
1	A1	1.5E8	150000000	N2	FAM	STANDARD	FAM	NFQ-MGB	Amp	11.2093	11.1786	0.865825	0.0342489			FALSE	44574.3	TRUE	3	5					41.3349	0.994154	-3.6398	88.2523	0.739349	0.055821	FALSE
2	A2	1.5E8	150000000	N2	FAM	STANDARD	FAM	NFQ-MGB	Amp	11.1849	11.1786	0.867611	0.0342489			FALSE	44574.3	TRUE	3	5					41.3349	0.994154	-3.6398	88.2523	0.739349	0.055821	FALSE
3	A3	1.5E8	150000000	N2	FAM	STANDARD	FAM	NFQ-MGB	Amp	11.1417	11.1786	0.854194	0.0342489			FALSE	44574.3	TRUE	3	5					41.3349	0.994154	-3.6398	88.2523	0.739349	0.055821	FALSE
7	A7	Sample 1	7.70454	N2	FAM	UNKNOWN	FAM	NFQ-MGB	Inconclusive	38.1073	38.1073	0.883523				FALSE	44574.3	TRUE	3	31					41.3349	0.994154	-3.6398	88.2523	0.739349	0.055821	FALSE		Sample 01	Kidney	Male	1.M	0.5	100	150	1200	3	100	138	MADKV21	Lung was originally Ran 1/05/22 Results below
8	A8	Sample 1		N2	FAM	UNKNOWN	FAM	NFQ-MGB	No Amp	Undetermined	38.1073	0				FALSE	44574.3	TRUE	3	39					41.3349	0.994154	-3.6398	88.2523	0.739349	0.055821	FALSE
9	A9	Sample 1		N2	FAM	UNKNOWN	FAM	NFQ-MGB	No Amp	Undetermined	38.1073	0				FALSE	44574.3	TRUE	3	39					41.3349	0.994154	-3.6398	88.2523	0.739349	0.055821	FALSE
31	B7	Sample 2		N2	FAM	UNKNOWN	FAM	NFQ-MGB	No Amp	Undetermined		0				FALSE	44574.3	TRUE	3	39					41.3349	0.994154	-3.6398	88.2523	0.739349	0.055821	FALSE		Sample 02	Spleen	Male	1.M	8.4	100	150	1200	3	100	19	MADKV21
32	B8	Sample 2		N2	FAM	UNKNOWN	FAM	NFQ-MGB	No Amp	Undetermined		0				FALSE	44574.3	TRUE	3	39					41.3349	0.994154	-3.6398	88.2523	0.739349	0.055821	FALSE
33	B9	Sample 2		N2	FAM	UNKNOWN	FAM	NFQ-MGB	No Amp	Undetermined		0				FALSE	44574.3	TRUE	3	39					41.3349	0.994154	-3.6398	88.2523	0.739349	0.055821	FALSE
55	C7	Sample 3		N2	FAM	UNKNOWN	FAM	NFQ-MGB	No Amp	Undetermined	38.8079	0				FALSE	44574.3	TRUE	3	39					41.3349	0.994154	-3.6398	88.2523	0.739349	0.055821	FALSE		Sample 03	Duodnum	Male	1.M	0.5	100	150	1200	3	100	18	MADKV21
56	C8	Sample 3		N2	FAM	UNKNOWN	FAM	NFQ-MGB	No Amp	Undetermined	38.8079	0				FALSE	44574.3	TRUE	3	39					41.3349	0.994154	-3.6398	88.2523	0.739349	0.055821	FALSE
57	C9	Sample 3	4.94629	N2	FAM	UNKNOWN	FAM	NFQ-MGB	Inconclusive	38.8079	38.8079	0.212094				FALSE	44574.3	TRUE	3	31					41.3349	0.994154	-3.6398	88.2523	0.739349	0.055821	FALSE
79	D7	Sample 4		N2	FAM	UNKNOWN	FAM	NFQ-MGB	No Amp	Undetermined	39.0705	0				FALSE	44574.3	TRUE	3	39					41.3349	0.994154	-3.6398	88.2523	0.739349	0.055821	FALSE		Sample 04	Stomach	Male	1.M	6.3	100	150	1200	3	100	30	MADKV21
80	D8	Sample 4		N2	FAM	UNKNOWN	FAM	NFQ-MGB	No Amp	Undetermined	39.0705	0				FALSE	44574.3	TRUE	3	39					41.3349	0.994154	-3.6398	88.2523	0.739349	0.055821	FALSE
81	D9	Sample 4	4.18906	N2	FAM	UNKNOWN	FAM	NFQ-MGB	Inconclusive	39.0705	39.0705	0				FALSE	44574.3	TRUE	3	32					41.3349	0.994154	-3.6398	88.2523	0.739349	0.055821	FALSE
103	E7	Sample 5		N2	FAM	UNKNOWN	FAM	NFQ-MGB	No Amp	Undetermined		0				FALSE	44574.3	TRUE	3	39					41.3349	0.994154	-3.6398	88.2523	0.739349	0.055821	FALSE		Sample 05	Lung	Male	1.M	1.34228	100	150	1200	3	100	39	MADKV21
104	E8	Sample 5		N2	FAM	UNKNOWN	FAM	NFQ-MGB	No Amp	Undetermined		0				FALSE	44574.3	TRUE	3	39					41.3349	0.994154	-3.6398	88.2523	0.739349	0.055821	FALSE
105	E9	Sample 5		N2	FAM	UNKNOWN	FAM	NFQ-MGB	No Amp	Undetermined		0				FALSE	44574.3	TRUE	3	39					41.3349	0.994154	-3.6398	88.2523	0.739349	0.055821	FALSE
127	F7	Sample 6		N2	FAM	UNKNOWN	FAM	NFQ-MGB	No Amp	Undetermined	38.0046	0	0.580186			FALSE	44574.3	TRUE	3	39					41.3349	0.994154	-3.6398	88.2523	0.739349	0.055821	FALSE		Sample 06	Heart	Male	1.M	6.2	100	150	1200	3	100	21	MADKV21
128	F8	Sample 6	6.34229	N2	FAM	UNKNOWN	FAM	NFQ-MGB	Inconclusive	38.4149	38.0046	0.660057	0.580186			FALSE	44574.3	TRUE	3	30					41.3349	0.994154	-3.6398	88.2523	0.739349	0.055821	FALSE
129	F9	Sample 6	10.6579	N2	FAM	UNKNOWN	FAM	NFQ-MGB	Amp	37.5944	38.0046	0.942372	0.580186			FALSE	44574.3	TRUE	3	30					41.3349	0.994154	-3.6398	88.2523	0.739349	0.055821	FALSE
151	G7	Sample 7		N2	FAM	UNKNOWN	FAM	NFQ-MGB	No Amp	Undetermined		0				FALSE	44574.3	TRUE	3	39					41.3349	0.994154	-3.6398	88.2523	0.739349	0.055821	FALSE		Sample 07	Liver	Male	1.M	0.5	100	150	1200	3	100	42	MADKV21
152	G8	Sample 7		N2	FAM	UNKNOWN	FAM	NFQ-MGB	No Amp	Undetermined		0				FALSE	44574.3	TRUE	3	39					41.3349	0.994154	-3.6398	88.2523	0.739349	0.055821	FALSE
153	G9	Sample 7		N2	FAM	UNKNOWN	FAM	NFQ-MGB	No Amp	Undetermined		0				FALSE	44574.3	TRUE	3	39					41.3349	0.994154	-3.6398	88.2523	0.739349	0.055821	FALSE
199	I7	Sample 9		N2	FAM	UNKNOWN	FAM	NFQ-MGB	No Amp	Undetermined		0				FALSE	44574.3	TRUE	3	39					41.3349	0.994154	-3.6398	88.2523	0.739349	0.055821	FALSE		Sample 09	Kidney	Male	2.M	3.6	100	150	1200	3	100	60	MADKV21
200	I8	Sample 9		N2	FAM	UNKNOWN	FAM	NFQ-MGB	No Amp	Undetermined		0				FALSE	44574.3	TRUE	3	39					41.3349	0.994154	-3.6398	88.2523	0.739349	0.055821	FALSE
201	I9	Sample 9		N2	FAM	UNKNOWN	FAM	NFQ-MGB	No Amp	Undetermined		0				FALSE	44574.3	TRUE	3	39					41.3349	0.994154	-3.6398	88.2523	0.739349	0.055821	FALSE
223	J7	Sample 10		N2	FAM	UNKNOWN	FAM	NFQ-MGB	No Amp	Undetermined		0				FALSE	44574.3	TRUE	3	39					41.3349	0.994154	-3.6398	88.2523	0.739349	0.055821	FALSE		Sample 10	Spleen	Male	2.M	0	100	150	1200	3	100	20	MADKV21
224	J8	Sample 10		N2	FAM	UNKNOWN	FAM	NFQ-MGB	No Amp	Undetermined		0				FALSE	44574.3	TRUE	3	39					41.3349	0.994154	-3.6398	88.2523	0.739349	0.055821	FALSE
225	J9	Sample 10		N2	FAM	UNKNOWN	FAM	NFQ-MGB	No Amp	Undetermined		0				FALSE	44574.3	TRUE	3	39					41.3349	0.994154	-3.6398	88.2523	0.739349	0.055821	FALSE
247	K7	Sample 11		N2	FAM	UNKNOWN	FAM	NFQ-MGB	No Amp	Undetermined		0				FALSE	44574.3	TRUE	3	39					41.3349	0.994154	-3.6398	88.2523	0.739349	0.055821	FALSE		Sample 11	Duodnum	Male	2.M	0.8	100	150	1200	3	100	13	MADKV21
248	K8	Sample 11		N2	FAM	UNKNOWN	FAM	NFQ-MGB	No Amp	Undetermined		0				FALSE	44574.3	TRUE	3	39					41.3349	0.994154	-3.6398	88.2523	0.739349	0.055821	FALSE
249	K9	Sample 11		N2	FAM	UNKNOWN	FAM	NFQ-MGB	No Amp	Undetermined		0				FALSE	44574.3	TRUE	3	39					41.3349	0.994154	-3.6398	88.2523	0.739349	0.055821	FALSE
271	L7	Sample 12	3.29976	N2	FAM	UNKNOWN	FAM	NFQ-MGB	Inconclusive	39.4477	39.4602	0	0.0176254			FALSE	44574.3	TRUE	3	31					41.3349	0.994154	-3.6398	88.2523	0.739349	0.055821	FALSE		Sample 12	Stomach	Male	2.M	13	100	150	1200	3	100	34	MADKV21
272	L8	Sample 12	3.24814	N2	FAM	UNKNOWN	FAM	NFQ-MGB	Inconclusive	39.4727	39.4602	0	0.0176254			FALSE	44574.3	TRUE	3	30					41.3349	0.994154	-3.6398	88.2523	0.739349	0.055821	FALSE
273	L9	Sample 12		N2	FAM	UNKNOWN	FAM	NFQ-MGB	No Amp	Undetermined	39.4602	0	0.0176254			FALSE	44574.3	TRUE	3	30					41.3349	0.994154	-3.6398	88.2523	0.739349	0.055821	FALSE
295	M7	Sample 13	3.05908	N2	FAM	UNKNOWN	FAM	NFQ-MGB	Inconclusive	39.5674	39.5865	0	0.17828	3.03509	0.338698	FALSE	44574.3	TRUE	3	32					41.3349	0.994154	-3.6398	88.2523	0.739349	0.055821	FALSE		Sample 13	Lung	Male	2.M	1.14286	100	150	1200	3	100	41	MADKV21
296	M8	Sample 13	3.36115	N2	FAM	UNKNOWN	FAM	NFQ-MGB	Inconclusive	39.4186	39.5865	0	0.17828	3.03509	0.338698	FALSE	44574.3	TRUE	3	28					41.3349	0.994154	-3.6398	88.2523	0.739349	0.055821	FALSE
297	M9	Sample 13	2.68503	N2	FAM	UNKNOWN	FAM	NFQ-MGB	Inconclusive	39.7736	39.5865	0	0.17828	3.03509	0.338698	FALSE	44574.3	TRUE	3	33					41.3349	0.994154	-3.6398	88.2523	0.739349	0.055821	FALSE
319	N7	Sample 14		N2	FAM	UNKNOWN	FAM	NFQ-MGB	No Amp	Undetermined		0				FALSE	44574.3	TRUE	3	39					41.3349	0.994154	-3.6398	88.2523	0.739349	0.055821	FALSE		Sample 14	Heart	Male	2.M	7.9	100	150	1200	3	100	24	MADKV21
320	N8	Sample 14		N2	FAM	UNKNOWN	FAM	NFQ-MGB	No Amp	Undetermined		0				FALSE	44574.3	TRUE	3	30					41.3349	0.994154	-3.6398	88.2523	0.739349	0.055821	FALSE
321	N9	Sample 14		N2	FAM	UNKNOWN	FAM	NFQ-MGB	No Amp	Undetermined		0				FALSE	44574.3	TRUE	3	39					41.3349	0.994154	-3.6398	88.2523	0.739349	0.055821	FALSE
343	O7	Sample 15		N2	FAM	UNKNOWN	FAM	NFQ-MGB	No Amp	Undetermined		0				FALSE	44574.3	TRUE	3	39					41.3349	0.994154	-3.6398	88.2523	0.739349	0.055821	FALSE		Sample 15	Liver	Male	2.M	0.5	100	150	1200	3	100	61	MADKV21
344	O8	Sample 15		N2	FAM	UNKNOWN	FAM	NFQ-MGB	No Amp	Undetermined		0				FALSE	44574.3	TRUE	3	39					41.3349	0.994154	-3.6398	88.2523	0.739349	0.055821	FALSE
345	O9	Sample 15		N2	FAM	UNKNOWN	FAM	NFQ-MGB	No Amp	Undetermined		0				FALSE	44574.3	TRUE	3	39					41.3349	0.994154	-3.6398	88.2523	0.739349	0.055821	FALSE
10	A10	Sample 17		N2	FAM	UNKNOWN	FAM	NFQ-MGB	No Amp	Undetermined		0				FALSE	44574.3	TRUE	3	29					41.3349	0.994154	-3.6398	88.2523	0.739349	0.055821	FALSE		Sample 17	Kidney	Male	3.M	0.5	100	150	1200	3	100	72	MADKV21
11	A11	Sample 17		N2	FAM	UNKNOWN	FAM	NFQ-MGB	No Amp	Undetermined		0				FALSE	44574.3	TRUE	3	39					41.3349	0.994154	-3.6398	88.2523	0.739349	0.055821	FALSE
12	A12	Sample 17		N2	FAM	UNKNOWN	FAM	NFQ-MGB	No Amp	Undetermined		0				FALSE	44574.3	TRUE	3	39					41.3349	0.994154	-3.6398	88.2523	0.739349	0.055821	FALSE
34	B10	Sample 18		N2	FAM	UNKNOWN	FAM	NFQ-MGB	No Amp	Undetermined	38.6115	0				FALSE	44574.3	TRUE	3	39					41.3349	0.994154	-3.6398	88.2523	0.739349	0.055821	FALSE		Sample 18	Spleen	Male	3.M	1.6	100	150	1200	3	100	26	MADKV21
35	B11	Sample 18	5.60067	N2	FAM	UNKNOWN	FAM	NFQ-MGB	Inconclusive	38.6115	38.6115	0.466858				FALSE	44574.3	TRUE	3	26					41.3349	0.994154	-3.6398	88.2523	0.739349	0.055821	FALSE
36	B12	Sample 18		N2	FAM	UNKNOWN	FAM	NFQ-MGB	No Amp	Undetermined	38.6115	0				FALSE	44574.3	TRUE	3	39					41.3349	0.994154	-3.6398	88.2523	0.739349	0.055821	FALSE
58	C10	Sample 19		N2	FAM	UNKNOWN	FAM	NFQ-MGB	No Amp	Undetermined		0				FALSE	44574.3	TRUE	3	39					41.3349	0.994154	-3.6398	88.2523	0.739349	0.055821	FALSE		Sample 19	Duodnum	Male	3.M	0.9	100	150	1200	3	100	8	MADKV21
59	C11	Sample 19		N2	FAM	UNKNOWN	FAM	NFQ-MGB	No Amp	Undetermined		0				FALSE	44574.3	TRUE	3	39					41.3349	0.994154	-3.6398	88.2523	0.739349	0.055821	FALSE
60	C12	Sample 19		N2	FAM	UNKNOWN	FAM	NFQ-MGB	No Amp	Undetermined		0				FALSE	44574.3	TRUE	3	39					41.3349	0.994154	-3.6398	88.2523	0.739349	0.055821	FALSE
82	D10	Sample 20		N2	FAM	UNKNOWN	FAM	NFQ-MGB	No Amp	Undetermined		0				FALSE	44574.3	TRUE	3	39					41.3349	0.994154	-3.6398	88.2523	0.739349	0.055821	FALSE		Sample 20	Stomach	Male	3.M	0.5	100	150	1200	3	100	74	MADKV21
83	D11	Sample 20		N2	FAM	UNKNOWN	FAM	NFQ-MGB	No Amp	Undetermined		0				FALSE	44574.3	TRUE	3	39					41.3349	0.994154	-3.6398	88.2523	0.739349	0.055821	FALSE
84	D12	Sample 20		N2	FAM	UNKNOWN	FAM	NFQ-MGB	No Amp	Undetermined		0				FALSE	44574.3	TRUE	3	39					41.3349	0.994154	-3.6398	88.2523	0.739349	0.055821	FALSE
106	E10	Sample 21		N2	FAM	UNKNOWN	FAM	NFQ-MGB	No Amp	Undetermined	38.8366	0				FALSE	44574.3	TRUE	3	39					41.3349	0.994154	-3.6398	88.2523	0.739349	0.055821	FALSE		Sample 21	Lung	Male	3.M	1.16279	100	150	1200	3	100	46	MADKV21
107	E11	Sample 21		N2	FAM	UNKNOWN	FAM	NFQ-MGB	No Amp	Undetermined	38.8366	0				FALSE	44574.3	TRUE	3	39					41.3349	0.994154	-3.6398	88.2523	0.739349	0.055821	FALSE
108	E12	Sample 21	4.85713	N2	FAM	UNKNOWN	FAM	NFQ-MGB	Inconclusive	38.8366	38.8366	0.196544				FALSE	44574.3	TRUE	3	31					41.3349	0.994154	-3.6398	88.2523	0.739349	0.055821	FALSE
130	F10	Sample 22		N2	FAM	UNKNOWN	FAM	NFQ-MGB	No Amp	Undetermined	38.2978	0				FALSE	44574.3	TRUE	3	39					41.3349	0.994154	-3.6398	88.2523	0.739349	0.055821	FALSE		Sample 22	Heart	Male	3.M	6.5	100	150	1200	3	100	43	MADKV21
131	F11	Sample 22	6.82981	N2	FAM	UNKNOWN	FAM	NFQ-MGB	Inconclusive	38.2978	38.2978	0.778298				FALSE	44574.3	TRUE	3	33					41.3349	0.994154	-3.6398	88.2523	0.739349	0.055821	FALSE
132	F12	Sample 22		N2	FAM	UNKNOWN	FAM	NFQ-MGB	No Amp	Undetermined	38.2978	0				FALSE	44574.3	TRUE	3	39					41.3349	0.994154	-3.6398	88.2523	0.739349	0.055821	FALSE
154	G10	Sample 23		N2	FAM	UNKNOWN	FAM	NFQ-MGB	No Amp	Undetermined		0				FALSE	44574.3	TRUE	3	39					41.3349	0.994154	-3.6398	88.2523	0.739349	0.055821	FALSE		Sample 23	Liver	Male	3.M	0.5	100	150	1200	3	100	56	MADKV21
155	G11	Sample 23		N2	FAM	UNKNOWN	FAM	NFQ-MGB	No Amp	Undetermined		0				FALSE	44574.3	TRUE	3	39					41.3349	0.994154	-3.6398	88.2523	0.739349	0.055821	FALSE
156	G12	Sample 23		N2	FAM	UNKNOWN	FAM	NFQ-MGB	No Amp	Undetermined		0				FALSE	44574.3	TRUE	3	39					41.3349	0.994154	-3.6398	88.2523	0.739349	0.055821	FALSE
202	I10	Sample 25	10.0964	N2	FAM	UNKNOWN	FAM	NFQ-MGB	Amp	37.6799	38.0595	0.94774	0.724142	8.45701	3.27839	FALSE	44574.3	TRUE	3	30					41.3349	0.994154	-3.6398	88.2523	0.739349	0.055821	FALSE		Sample 25	Kidney	Male	1.2	0.5	100	150	1200	3	100	91	MADKV21
203	I11	Sample 25	10.5923	N2	FAM	UNKNOWN	FAM	NFQ-MGB	Amp	37.6041	38.0595	0.958964	0.724142	8.45701	3.27839	FALSE	44574.3	TRUE	3	28					41.3349	0.994154	-3.6398	88.2523	0.739349	0.055821	FALSE
204	I12	Sample 25	4.68229	N2	FAM	UNKNOWN	FAM	NFQ-MGB	Inconclusive	38.8946	38.0595	0.113137	0.724142	8.45701	3.27839	FALSE	44574.3	TRUE	3	29					41.3349	0.994154	-3.6398	88.2523	0.739349	0.055821	FALSE
226	J10	Sample 26	82.9427	N2	FAM	UNKNOWN	FAM	NFQ-MGB	Amp	34.3509	34.3385	0.965501	0.265093	84.3875	14.1845	FALSE	44574.3	TRUE	3	24					41.3349	0.994154	-3.6398	88.2523	0.739349	0.055821	FALSE		Sample 26	Spleen	Male	1.2	3.4	100	150	1200	3	100	25	MADKV21
227	J11	Sample 26	99.2392	N2	FAM	UNKNOWN	FAM	NFQ-MGB	Amp	34.0674	34.3385	0.972653	0.265093	84.3875	14.1845	FALSE	44574.3	TRUE	3	25					41.3349	0.994154	-3.6398	88.2523	0.739349	0.055821	FALSE
228	J12	Sample 26	70.9807	N2	FAM	UNKNOWN	FAM	NFQ-MGB	Amp	34.5971	34.3385	0.973564	0.265093	84.3875	14.1845	FALSE	44574.3	TRUE	3	26					41.3349	0.994154	-3.6398	88.2523	0.739349	0.055821	FALSE
250	K10	Sample 27		N2	FAM	UNKNOWN	FAM	NFQ-MGB	No Amp	Undetermined	39.9233	0				FALSE	44574.3	TRUE	3	39					41.3349	0.994154	-3.6398	88.2523	0.739349	0.055821	FALSE		Sample 27	Duodnum	Male	1.2	0.5	100	150	1200	3	100	16	MADKV21
251	K11	Sample 27	2.44248	N2	FAM	UNKNOWN	FAM	NFQ-MGB	Inconclusive	39.9233	39.9233	0				FALSE	44574.3	TRUE	3	32					41.3349	0.994154	-3.6398	88.2523	0.739349	0.055821	FALSE
252	K12	Sample 27		N2	FAM	UNKNOWN	FAM	NFQ-MGB	No Amp	Undetermined	39.9233	0				FALSE	44574.3	TRUE	3	31					41.3349	0.994154	-3.6398	88.2523	0.739349	0.055821	FALSE
274	L10	Sample 28	163.397	N2	FAM	UNKNOWN	FAM	NFQ-MGB	Amp	33.2791	33.1786	0.968507	0.164419	174.769	18.6862	FALSE	44574.3	TRUE	3	26					41.3349	0.994154	-3.6398	88.2523	0.739349	0.055821	FALSE		Sample 28	Stomach	Male	1.2	0.5	100	150	1200	3	100	39	MADKV21
275	L11	Sample 28	196.335	N2	FAM	UNKNOWN	FAM	NFQ-MGB	Amp	32.9888	33.1786	0.963557	0.164419	174.769	18.6862	FALSE	44574.3	TRUE	3	24					41.3349	0.994154	-3.6398	88.2523	0.739349	0.055821	FALSE
276	L12	Sample 28	164.574	N2	FAM	UNKNOWN	FAM	NFQ-MGB	Amp	33.2678	33.1786	0.967559	0.164419	174.769	18.6862	FALSE	44574.3	TRUE	3	23					41.3349	0.994154	-3.6398	88.2523	0.739349	0.055821	FALSE
298	M10	Sample 29	8.59419e+06	N2	FAM	UNKNOWN	FAM	NFQ-MGB	Amp	16.0958	16.0941	0.970509	0.0836027	8.61127e+06	455634	FALSE	44574.3	TRUE	3	9					41.3349	0.994154	-3.6398	88.2523	0.739349	0.055821	FALSE		Sample 29	Lung	Male	1.2	0.966184	100	150	1200	3	100	41	MADKV21
299	M11	Sample 29	9.07521e+06	N2	FAM	UNKNOWN	FAM	NFQ-MGB	Amp	16.0097	16.0941	0.969591	0.0836027	8.61127e+06	455634	FALSE	44574.3	TRUE	3	9					41.3349	0.994154	-3.6398	88.2523	0.739349	0.055821	FALSE
300	M12	Sample 29	8.16442e+06	N2	FAM	UNKNOWN	FAM	NFQ-MGB	Amp	16.1769	16.0941	0.980828	0.0836027	8.61127e+06	455634	FALSE	44574.3	TRUE	3	10					41.3349	0.994154	-3.6398	88.2523	0.739349	0.055821	FALSE
322	N10	Sample 30	77.5357	N2	FAM	UNKNOWN	FAM	NFQ-MGB	Amp	34.4575	34.3874	0.968436	0.196201	81.4764	10.3806	FALSE	44574.3	TRUE	3	23					41.3349	0.994154	-3.6398	88.2523	0.739349	0.055821	FALSE		Sample 30	Heart	Male	1.2	8.5	100	150	1200	3	100	30	MADKV21
323	N11	Sample 30	73.6431	N2	FAM	UNKNOWN	FAM	NFQ-MGB	Amp	34.5389	34.3874	0.966313	0.196201	81.4764	10.3806	FALSE	44574.3	TRUE	3	26					41.3349	0.994154	-3.6398	88.2523	0.739349	0.055821	FALSE
324	N12	Sample 30	93.2503	N2	FAM	UNKNOWN	FAM	NFQ-MGB	Amp	34.1658	34.3874	0.966841	0.196201	81.4764	10.3806	FALSE	44574.3	TRUE	3	26					41.3349	0.994154	-3.6398	88.2523	0.739349	0.055821	FALSE
346	O10	Sample 31	16.1865	N2	FAM	UNKNOWN	FAM	NFQ-MGB	Amp	36.9338	35.8919	0.97142	0.904701	34.4243	15.8959	FALSE	44574.3	TRUE	3	31					41.3349	0.994154	-3.6398	88.2523	0.739349	0.055821	FALSE		Sample 31	Liver	Male	1.2	0.5	100	150	1200	3	100	52	MADKV21
347	O11	Sample 31	45.337	N2	FAM	UNKNOWN	FAM	NFQ-MGB	Amp	35.3057	35.8919	0.964724	0.904701	34.4243	15.8959	FALSE	44574.3	TRUE	3	27					41.3349	0.994154	-3.6398	88.2523	0.739349	0.055821	FALSE
348	O12	Sample 31	41.7492	N2	FAM	UNKNOWN	FAM	NFQ-MGB	Amp	35.4361	35.8919	0.968155	0.904701	34.4243	15.8959	FALSE	44574.3	TRUE	3	28					41.3349	0.994154	-3.6398	88.2523	0.739349	0.055821	FALSE
13	A13	Sample 33	61.1744	N2	FAM	UNKNOWN	FAM	NFQ-MGB	Amp	34.8321	35.6462	0.943423	1.05436	41.5929	22.3742	FALSE	44574.3	TRUE	3	30					41.3349	0.994154	-3.6398	88.2523	0.739349	0.055821	FALSE		Sample 33	Kidney	Male	2.2	0.5	100	150	1200	3	100	81	MADKV21
14	A14	Sample 33	17.2066	N2	FAM	UNKNOWN	FAM	NFQ-MGB	Amp	36.8372	35.6462	0.896495	1.05436	41.5929	22.3742	FALSE	44574.3	TRUE	3	30					41.3349	0.994154	-3.6398	88.2523	0.739349	0.055821	FALSE
15	A15	Sample 33	46.3976	N2	FAM	UNKNOWN	FAM	NFQ-MGB	Amp	35.2692	35.6462	0.922395	1.05436	41.5929	22.3742	FALSE	44574.3	TRUE	3	28					41.3349	0.994154	-3.6398	88.2523	0.739349	0.055821	FALSE
37	B13	Sample 34	83.0295	N2	FAM	UNKNOWN	FAM	NFQ-MGB	Amp	34.3493	34.1287	0.979603	0.221704	96.0887	13.4582	FALSE	44574.3	TRUE	3	26					41.3349	0.994154	-3.6398	88.2523	0.739349	0.055821	FALSE		Sample 34	Spleen	Male	2.2	4.3	100	150	1200	3	100	17	MADKV21
38	B14	Sample 34	109.913	N2	FAM	UNKNOWN	FAM	NFQ-MGB	Amp	33.9059	34.1287	0.969576	0.221704	96.0887	13.4582	FALSE	44574.3	TRUE	3	26					41.3349	0.994154	-3.6398	88.2523	0.739349	0.055821	FALSE
39	B15	Sample 34	95.3233	N2	FAM	UNKNOWN	FAM	NFQ-MGB	Amp	34.131	34.1287	0.982525	0.221704	96.0887	13.4582	FALSE	44574.3	TRUE	3	28					41.3349	0.994154	-3.6398	88.2523	0.739349	0.055821	FALSE
61	C13	Sample 35	87.8327	N2	FAM	UNKNOWN	FAM	NFQ-MGB	Amp	34.2604	33.9129	0.973829	0.419179	112.092	30.9141	FALSE	44574.3	TRUE	3	27					41.3349	0.994154	-3.6398	88.2523	0.739349	0.055821	FALSE		Sample 35	Duodnum	Male	2.2	0.5	100	150	1200	3	100	26	MADKV21
62	C14	Sample 35	101.544	N2	FAM	UNKNOWN	FAM	NFQ-MGB	Amp	34.0311	33.9129	0.967829	0.419179	112.092	30.9141	FALSE	44574.3	TRUE	3	26					41.3349	0.994154	-3.6398	88.2523	0.739349	0.055821	FALSE
63	C15	Sample 35	146.9	N2	FAM	UNKNOWN	FAM	NFQ-MGB	Amp	33.4474	33.9129	0.96913	0.419179	112.092	30.9141	FALSE	44574.3	TRUE	3	25					41.3349	0.994154	-3.6398	88.2523	0.739349	0.055821	FALSE
85	D13	Sample 36	229.832	N2	FAM	UNKNOWN	FAM	NFQ-MGB	Amp	32.7398	32.4132	0.97852	0.294017	285.782	50.9891	FALSE	44574.3	TRUE	3	25					41.3349	0.994154	-3.6398	88.2523	0.739349	0.055821	FALSE		Sample 36	Stomach	Male	2.2	7.9	100	150	1200	3	100	26	MADKV21
86	D14	Sample 36	297.876	N2	FAM	UNKNOWN	FAM	NFQ-MGB	Amp	32.3299	32.4132	0.96722	0.294017	285.782	50.9891	FALSE	44574.3	TRUE	3	21					41.3349	0.994154	-3.6398	88.2523	0.739349	0.055821	FALSE
87	D15	Sample 36	329.636	N2	FAM	UNKNOWN	FAM	NFQ-MGB	Amp	32.1698	32.4132	0.987107	0.294017	285.782	50.9891	FALSE	44574.3	TRUE	3	24					41.3349	0.994154	-3.6398	88.2523	0.739349	0.055821	FALSE
109	E13	Sample 37	1.31577e+07	N2	FAM	UNKNOWN	FAM	NFQ-MGB	Amp	15.4225	15.0941	0.964202	0.284824	1.63662e+07	2.78358e+06	FALSE	44574.3	TRUE	3	7					41.3349	0.994154	-3.6398	88.2523	0.739349	0.055821	FALSE		Sample 37	Lung	Male	2.2	1.07527	100	150	1200	3	100	25	MADKV21
110	E14	Sample 37	1.81365e+07	N2	FAM	UNKNOWN	FAM	NFQ-MGB	Amp	14.9152	15.0941	0.976028	0.284824	1.63662e+07	2.78358e+06	FALSE	44574.3	TRUE	3	8					41.3349	0.994154	-3.6398	88.2523	0.739349	0.055821	FALSE
111	E15	Sample 37	1.78044e+07	N2	FAM	UNKNOWN	FAM	NFQ-MGB	Amp	14.9444	15.0941	0.983999	0.284824	1.63662e+07	2.78358e+06	FALSE	44574.3	TRUE	3	6					41.3349	0.994154	-3.6398	88.2523	0.739349	0.055821	FALSE
133	F13	Sample 38	64.1727	N2	FAM	UNKNOWN	FAM	NFQ-MGB	Amp	34.7565	34.6184	0.966209	0.232539	70.551	10.7775	FALSE	44574.3	TRUE	3	28					41.3349	0.994154	-3.6398	88.2523	0.739349	0.055821	FALSE		Sample 38	Heart	Male	2.2	6	100	150	1200	3	100	43	MADKV21
134	F14	Sample 38	64.4859	N2	FAM	UNKNOWN	FAM	NFQ-MGB	Amp	34.7488	34.6184	0.978618	0.232539	70.551	10.7775	FALSE	44574.3	TRUE	3	26					41.3349	0.994154	-3.6398	88.2523	0.739349	0.055821	FALSE
135	F15	Sample 38	82.9945	N2	FAM	UNKNOWN	FAM	NFQ-MGB	Amp	34.3499	34.6184	0.960904	0.232539	70.551	10.7775	FALSE	44574.3	TRUE	3	27					41.3349	0.994154	-3.6398	88.2523	0.739349	0.055821	FALSE
157	G13	Sample 39	70.9481	N2	FAM	UNKNOWN	FAM	NFQ-MGB	Amp	34.5978	34.2932	0.971042	0.276904	86.8936	14.6991	FALSE	44574.3	TRUE	3	28					41.3349	0.994154	-3.6398	88.2523	0.739349	0.055821	FALSE		Sample 39	Liver	Male	2.2	0.5	100	150	1200	3	100	53	MADKV21
158	G14	Sample 39	99.9031	N2	FAM	UNKNOWN	FAM	NFQ-MGB	Amp	34.0568	34.2932	0.969571	0.276904	86.8936	14.6991	FALSE	44574.3	TRUE	3	26					41.3349	0.994154	-3.6398	88.2523	0.739349	0.055821	FALSE
159	G15	Sample 39	89.8297	N2	FAM	UNKNOWN	FAM	NFQ-MGB	Amp	34.2248	34.2932	0.971145	0.276904	86.8936	14.6991	FALSE	44574.3	TRUE	3	25					41.3349	0.994154	-3.6398	88.2523	0.739349	0.055821	FALSE
205	I13	Sample 41	22.2281	N2	FAM	UNKNOWN	FAM	NFQ-MGB	Amp	36.4324	36.1716	0.948383	0.572867	27.4531	10.6657	FALSE	44574.3	TRUE	3	29					41.3349	0.994154	-3.6398	88.2523	0.739349	0.055821	FALSE		Sample 41	Kidney	Male	3.2	0.5	100	150	1200	3	100	99	MADKV21
206	I14	Sample 41	20.4074	N2	FAM	UNKNOWN	FAM	NFQ-MGB	Amp	36.5675	36.1716	0.952036	0.572867	27.4531	10.6657	FALSE	44574.3	TRUE	3	29					41.3349	0.994154	-3.6398	88.2523	0.739349	0.055821	FALSE
207	I15	Sample 41	39.7238	N2	FAM	UNKNOWN	FAM	NFQ-MGB	Amp	35.5147	36.1716	0.97059	0.572867	27.4531	10.6657	FALSE	44574.3	TRUE	3	25					41.3349	0.994154	-3.6398	88.2523	0.739349	0.055821	FALSE
229	J13	Sample 42	28.0871	N2	FAM	UNKNOWN	FAM	NFQ-MGB	Amp	36.0626	35.3964	0.949622	0.590983	44.7121	15.022	FALSE	44574.3	TRUE	3	27					41.3349	0.994154	-3.6398	88.2523	0.739349	0.055821	FALSE		Sample 42	Spleen	Male	3.2	6	100	150	1200	3	100	19	MADKV21
230	J14	Sample 42	48.7386	N2	FAM	UNKNOWN	FAM	NFQ-MGB	Amp	35.1914	35.3964	0.963485	0.590983	44.7121	15.022	FALSE	44574.3	TRUE	3	27					41.3349	0.994154	-3.6398	88.2523	0.739349	0.055821	FALSE
231	J15	Sample 42	57.3105	N2	FAM	UNKNOWN	FAM	NFQ-MGB	Amp	34.9353	35.3964	0.974901	0.590983	44.7121	15.022	FALSE	44574.3	TRUE	3	23					41.3349	0.994154	-3.6398	88.2523	0.739349	0.055821	FALSE
253	K13	Sample 43		N2	FAM	UNKNOWN	FAM	NFQ-MGB	No Amp	Undetermined	38.4604	0				FALSE	44574.3	TRUE	3	32					41.3349	0.994154	-3.6398	88.2523	0.739349	0.055821	FALSE		Sample 43	Duodnum	Male	3.2	0.5	100	150	1200	3	100	15	MADKV21
254	K14	Sample 43	6.16225	N2	FAM	UNKNOWN	FAM	NFQ-MGB	Inconclusive	38.4604	38.4604	0.585522				FALSE	44574.3	TRUE	3	29					41.3349	0.994154	-3.6398	88.2523	0.739349	0.055821	FALSE
255	K15	Sample 43		N2	FAM	UNKNOWN	FAM	NFQ-MGB	No Amp	Undetermined	38.4604	0				FALSE	44574.3	TRUE	3	39					41.3349	0.994154	-3.6398	88.2523	0.739349	0.055821	FALSE
277	L13	Sample 44	449.306	N2	FAM	UNKNOWN	FAM	NFQ-MGB	Amp	31.6802	31.6777	0.963617	0.00614188	450.02	1.75025	FALSE	44574.3	TRUE	3	23					41.3349	0.994154	-3.6398	88.2523	0.739349	0.055821	FALSE		Sample 44	Stomach	Male	3.2	9.4	100	150	1200	3	100	30	MADKV21
278	L14	Sample 44	448.739	N2	FAM	UNKNOWN	FAM	NFQ-MGB	Amp	31.6822	31.6777	0.976538	0.00614188	450.02	1.75025	FALSE	44574.3	TRUE	3	23					41.3349	0.994154	-3.6398	88.2523	0.739349	0.055821	FALSE
279	L15	Sample 44	452.014	N2	FAM	UNKNOWN	FAM	NFQ-MGB	Amp	31.6707	31.6777	0.96927	0.00614188	450.02	1.75025	FALSE	44574.3	TRUE	3	23					41.3349	0.994154	-3.6398	88.2523	0.739349	0.055821	FALSE
301	M13	Sample 45	6.7747e+06	N2	FAM	UNKNOWN	FAM	NFQ-MGB	Amp	16.4718	16.3586	0.973639	0.141044	7.29721e+06	662736	FALSE	44574.3	TRUE	3	9					41.3349	0.994154	-3.6398	88.2523	0.739349	0.055821	FALSE		Sample 45	Lung	Male	3.2	1.06383	100	150	1200	3	100	25	MADKV21
302	M14	Sample 45	8.04267e+06	N2	FAM	UNKNOWN	FAM	NFQ-MGB	Amp	16.2006	16.3586	0.970981	0.141044	7.29721e+06	662736	FALSE	44574.3	TRUE	3	7					41.3349	0.994154	-3.6398	88.2523	0.739349	0.055821	FALSE
303	M15	Sample 45	7.07426e+06	N2	FAM	UNKNOWN	FAM	NFQ-MGB	Amp	16.4034	16.3586	0.97507	0.141044	7.29721e+06	662736	FALSE	44574.3	TRUE	3	8					41.3349	0.994154	-3.6398	88.2523	0.739349	0.055821	FALSE
325	N13	Sample 46	349.62	N2	FAM	UNKNOWN	FAM	NFQ-MGB	Amp	32.0767	32.165	0.972746	0.108573	331.152	22.4069	FALSE	44574.3	TRUE	3	24					41.3349	0.994154	-3.6398	88.2523	0.739349	0.055821	FALSE		Sample 46	Heart	Male	3.2	4.4	100	150	1200	3	100	48	MADKV21
326	N14	Sample 46	337.611	N2	FAM	UNKNOWN	FAM	NFQ-MGB	Amp	32.132	32.165	0.967842	0.108573	331.152	22.4069	FALSE	44574.3	TRUE	3	22					41.3349	0.994154	-3.6398	88.2523	0.739349	0.055821	FALSE
327	N15	Sample 46	306.225	N2	FAM	UNKNOWN	FAM	NFQ-MGB	Amp	32.2862	32.165	0.97407	0.108573	331.152	22.4069	FALSE	44574.3	TRUE	3	25					41.3349	0.994154	-3.6398	88.2523	0.739349	0.055821	FALSE
349	O13	Sample 47	51.6985	N2	FAM	UNKNOWN	FAM	NFQ-MGB	Amp	35.0982	35.2038	0.967879	0.330717	49.0443	9.7417	FALSE	44574.3	TRUE	3	28					41.3349	0.994154	-3.6398	88.2523	0.739349	0.055821	FALSE		Sample 47	Liver	Male	3.2	0.8	100	150	1200	3	100	26	MADKV21
350	O14	Sample 47	38.2505	N2	FAM	UNKNOWN	FAM	NFQ-MGB	Amp	35.5744	35.2038	0.95685	0.330717	49.0443	9.7417	FALSE	44574.3	TRUE	3	29					41.3349	0.994154	-3.6398	88.2523	0.739349	0.055821	FALSE
351	O15	Sample 47	57.1838	N2	FAM	UNKNOWN	FAM	NFQ-MGB	Amp	34.9388	35.2038	0.970815	0.330717	49.0443	9.7417	FALSE	44574.3	TRUE	3	25					41.3349	0.994154	-3.6398	88.2523	0.739349	0.055821	FALSE
16	A16	Sample 49		N2	FAM	UNKNOWN	FAM	NFQ-MGB	No Amp	Undetermined	38.5417	0				FALSE	44574.3	TRUE	3	39					41.3349	0.994154	-3.6398	88.2523	0.739349	0.055821	FALSE		Sample 49	Kidney	Male	1.4	1.3	100	150	1200	3	100	62	MADKV21
17	A17	Sample 49	5.85345	N2	FAM	UNKNOWN	FAM	NFQ-MGB	Inconclusive	38.5417	38.5417	0.489756				FALSE	44574.3	TRUE	3	29					41.3349	0.994154	-3.6398	88.2523	0.739349	0.055821	FALSE
18	A18	Sample 49		N2	FAM	UNKNOWN	FAM	NFQ-MGB	No Amp	Undetermined	38.5417	0				FALSE	44574.3	TRUE	3	39					41.3349	0.994154	-3.6398	88.2523	0.739349	0.055821	FALSE
40	B16	Sample 50	74.008	N2	FAM	UNKNOWN	FAM	NFQ-MGB	Amp	34.5311	35.7395	0.979753	1.0497	40.3645	29.1614	FALSE	44574.3	TRUE	3	27					41.3349	0.994154	-3.6398	88.2523	0.739349	0.055821	FALSE		Sample 50	Spleen	Male	1.4	3.7	100	150	1200	3	100	20	MADKV21
41	B17	Sample 50	22.328	N2	FAM	UNKNOWN	FAM	NFQ-MGB	Amp	36.4254	35.7395	0.96644	1.0497	40.3645	29.1614	FALSE	44574.3	TRUE	3	29					41.3349	0.994154	-3.6398	88.2523	0.739349	0.055821	FALSE
42	B18	Sample 50	24.7576	N2	FAM	UNKNOWN	FAM	NFQ-MGB	Amp	36.2621	35.7395	0.965491	1.0497	40.3645	29.1614	FALSE	44574.3	TRUE	3	27					41.3349	0.994154	-3.6398	88.2523	0.739349	0.055821	FALSE
64	C16	Sample 51	289.743	N2	FAM	UNKNOWN	FAM	NFQ-MGB	Amp	32.3737	32.3575	0.980363	0.397127	298.949	75.0754	FALSE	44574.3	TRUE	3	23					41.3349	0.994154	-3.6398	88.2523	0.739349	0.055821	FALSE		Sample 51	Duodnum	Male	1.4	0.5	100	150	1200	3	100	26	MADKV21
65	C17	Sample 51	228.9	N2	FAM	UNKNOWN	FAM	NFQ-MGB	Amp	32.7463	32.3575	0.97554	0.397127	298.949	75.0754	FALSE	44574.3	TRUE	3	24					41.3349	0.994154	-3.6398	88.2523	0.739349	0.055821	FALSE
66	C18	Sample 51	378.202	N2	FAM	UNKNOWN	FAM	NFQ-MGB	Amp	31.9525	32.3575	0.980862	0.397127	298.949	75.0754	FALSE	44574.3	TRUE	3	23					41.3349	0.994154	-3.6398	88.2523	0.739349	0.055821	FALSE
88	D16	Sample 52	35.0669	N2	FAM	UNKNOWN	FAM	NFQ-MGB	Amp	35.7118	36.5452	0.952734	0.915494	22.9701	11.9679	FALSE	44574.3	TRUE	3	28					41.3349	0.994154	-3.6398	88.2523	0.739349	0.055821	FALSE		Sample 52	Stomach	Male	1.4	8.5	100	150	1200	3	100	35	MADKV21
89	D17	Sample 52	22.7081	N2	FAM	UNKNOWN	FAM	NFQ-MGB	Amp	36.3987	36.5452	0.95059	0.915494	22.9701	11.9679	FALSE	44574.3	TRUE	3	28					41.3349	0.994154	-3.6398	88.2523	0.739349	0.055821	FALSE
90	D18	Sample 52	11.1354	N2	FAM	UNKNOWN	FAM	NFQ-MGB	Inconclusive	37.5251	36.5452	0.941084	0.915494	22.9701	11.9679	FALSE	44574.3	TRUE	3	31					41.3349	0.994154	-3.6398	88.2523	0.739349	0.055821	FALSE
112	E16	Sample 53	393670	N2	FAM	UNKNOWN	FAM	NFQ-MGB	Amp	20.9697	20.9737	0.990565	0.0068903	392675	1709.47	FALSE	44574.3	TRUE	3	14					41.3349	0.994154	-3.6398	88.2523	0.739349	0.055821	FALSE		Sample 53	Lung	Male	1.4	1.73913	100	150	1200	3	100	18	MADKV21
113	E17	Sample 53	390701	N2	FAM	UNKNOWN	FAM	NFQ-MGB	Amp	20.9817	20.9737	0.971298	0.0068903	392675	1709.47	FALSE	44574.3	TRUE	3	14					41.3349	0.994154	-3.6398	88.2523	0.739349	0.055821	FALSE
114	E18	Sample 53	393654	N2	FAM	UNKNOWN	FAM	NFQ-MGB	Amp	20.9698	20.9737	0.983311	0.0068903	392675	1709.47	FALSE	44574.3	TRUE	3	13					41.3349	0.994154	-3.6398	88.2523	0.739349	0.055821	FALSE
136	F16	Sample 54	50.5935	N2	FAM	UNKNOWN	FAM	NFQ-MGB	Amp	35.1323	35.3354	0.947906	0.767973	47.8506	20.6139	FALSE	44574.3	TRUE	3	26					41.3349	0.994154	-3.6398	88.2523	0.739349	0.055821	FALSE		Sample 54	Heart	Male	1.4	9.9	100	150	1200	3	100	22	MADKV21
137	F17	Sample 54	26.0026	N2	FAM	UNKNOWN	FAM	NFQ-MGB	Amp	36.1845	35.3354	0.950964	0.767973	47.8506	20.6139	FALSE	44574.3	TRUE	3	29					41.3349	0.994154	-3.6398	88.2523	0.739349	0.055821	FALSE
138	F18	Sample 54	66.9558	N2	FAM	UNKNOWN	FAM	NFQ-MGB	Amp	34.6894	35.3354	0.962311	0.767973	47.8506	20.6139	FALSE	44574.3	TRUE	3	27					41.3349	0.994154	-3.6398	88.2523	0.739349	0.055821	FALSE
160	G16	Sample 55	10.4394	N2	FAM	UNKNOWN	FAM	NFQ-MGB	Inconclusive	37.6271	37.8503	0.934966	0.315604			FALSE	44574.3	TRUE	3	29					41.3349	0.994154	-3.6398	88.2523	0.739349	0.055821	FALSE		Sample 55	Liver	Male	1.4	0.5	100	150	1200	3	100	67	MADKV21
161	G17	Sample 55	7.87136	N2	FAM	UNKNOWN	FAM	NFQ-MGB	Inconclusive	38.0735	37.8503	0.917673	0.315604			FALSE	44574.3	TRUE	3	31					41.3349	0.994154	-3.6398	88.2523	0.739349	0.055821	FALSE
162	G18	Sample 55		N2	FAM	UNKNOWN	FAM	NFQ-MGB	No Amp	Undetermined	37.8503	0	0.315604			FALSE	44574.3	TRUE	3	39					41.3349	0.994154	-3.6398	88.2523	0.739349	0.055821	FALSE
208	I16	Sample 57		N2	FAM	UNKNOWN	FAM	NFQ-MGB	No Amp	Undetermined	39.4533	0				FALSE	44574.3	TRUE	3	39					41.3349	0.994154	-3.6398	88.2523	0.739349	0.055821	FALSE		Sample 57	Kidney	Male	2.4	2.6	100	150	1200	3	100	59	MADKV21
209	I17	Sample 57	3.28817	N2	FAM	UNKNOWN	FAM	NFQ-MGB	Inconclusive	39.4533	39.4533	0				FALSE	44574.3	TRUE	3	33					41.3349	0.994154	-3.6398	88.2523	0.739349	0.055821	FALSE
210	I18	Sample 57		N2	FAM	UNKNOWN	FAM	NFQ-MGB	No Amp	Undetermined	39.4533	0				FALSE	44574.3	TRUE	3	39					41.3349	0.994154	-3.6398	88.2523	0.739349	0.055821	FALSE
232	J16	Sample 58	9.4311	N2	FAM	UNKNOWN	FAM	NFQ-MGB	Amp	37.7877	37.8155	0.95058	0.446796	9.51301	2.62807	FALSE	44574.3	TRUE	3	29					41.3349	0.994154	-3.6398	88.2523	0.739349	0.055821	FALSE		Sample 58	Spleen	Male	2.4	3.2	100	150	1200	3	100	11	MADKV21
233	J17	Sample 58	6.92686	N2	FAM	UNKNOWN	FAM	NFQ-MGB	Inconclusive	38.2755	37.8155	0.742414	0.446796	9.51301	2.62807	FALSE	44574.3	TRUE	3	31					41.3349	0.994154	-3.6398	88.2523	0.739349	0.055821	FALSE
234	J18	Sample 58	12.1811	N2	FAM	UNKNOWN	FAM	NFQ-MGB	Amp	37.3832	37.8155	0.953631	0.446796	9.51301	2.62807	FALSE	44574.3	TRUE	3	29					41.3349	0.994154	-3.6398	88.2523	0.739349	0.055821	FALSE
256	K16	Sample 59		N2	FAM	UNKNOWN	FAM	NFQ-MGB	No Amp	Undetermined		0				FALSE	44574.3	TRUE	3	39					41.3349	0.994154	-3.6398	88.2523	0.739349	0.055821	FALSE		Sample 59	Duodnum	Male	2.4	0.8	100	150	1200	3	100	6	MADKV21
257	K17	Sample 59		N2	FAM	UNKNOWN	FAM	NFQ-MGB	No Amp	Undetermined		0				FALSE	44574.3	TRUE	3	39					41.3349	0.994154	-3.6398	88.2523	0.739349	0.055821	FALSE
258	K18	Sample 59		N2	FAM	UNKNOWN	FAM	NFQ-MGB	No Amp	Undetermined		0				FALSE	44574.3	TRUE	3	39					41.3349	0.994154	-3.6398	88.2523	0.739349	0.055821	FALSE
280	L16	Sample 60	147.956	N2	FAM	UNKNOWN	FAM	NFQ-MGB	Amp	33.436	33.4603	0.964208	0.185392	146.372	16.9436	FALSE	44574.3	TRUE	3	26					41.3349	0.994154	-3.6398	88.2523	0.739349	0.055821	FALSE		Sample 60	Stomach	Male	2.4	6	100	150	1200	3	100	20	MADKV21
281	L17	Sample 60	128.692	N2	FAM	UNKNOWN	FAM	NFQ-MGB	Amp	33.6566	33.4603	0.973464	0.185392	146.372	16.9436	FALSE	44574.3	TRUE	3	23					41.3349	0.994154	-3.6398	88.2523	0.739349	0.055821	FALSE
282	L18	Sample 60	162.468	N2	FAM	UNKNOWN	FAM	NFQ-MGB	Amp	33.2881	33.4603	0.968974	0.185392	146.372	16.9436	FALSE	44574.3	TRUE	3	26					41.3349	0.994154	-3.6398	88.2523	0.739349	0.055821	FALSE
304	M16	Sample 61	160829	N2	FAM	UNKNOWN	FAM	NFQ-MGB	Amp	22.3848	22.3269	0.970909	0.0587832	166908	6210.7	FALSE	44574.3	TRUE	3	13					41.3349	0.994154	-3.6398	88.2523	0.739349	0.055821	FALSE		Sample 61	Lung	Male	2.4	0.560224	100	150	1200	3	100	45	MADKV21
305	M17	Sample 61	173242	N2	FAM	UNKNOWN	FAM	NFQ-MGB	Amp	22.2672	22.3269	0.976201	0.0587832	166908	6210.7	FALSE	44574.3	TRUE	3	15					41.3349	0.994154	-3.6398	88.2523	0.739349	0.055821	FALSE
306	M18	Sample 61	166652	N2	FAM	UNKNOWN	FAM	NFQ-MGB	Amp	22.3286	22.3269	0.971178	0.0587832	166908	6210.7	FALSE	44574.3	TRUE	3	15					41.3349	0.994154	-3.6398	88.2523	0.739349	0.055821	FALSE
328	N16	Sample 62	31.0377	N2	FAM	UNKNOWN	FAM	NFQ-MGB	Amp	35.9047	35.7037	0.969984	0.282527	35.6346	6.63256	FALSE	44574.3	TRUE	3	27					41.3349	0.994154	-3.6398	88.2523	0.739349	0.055821	FALSE		Sample 62	Heart	Male	2.4	11.5	100	150	1200	3	100	15	MADKV21
329	N17	Sample 62	43.238	N2	FAM	UNKNOWN	FAM	NFQ-MGB	Amp	35.3807	35.7037	0.96777	0.282527	35.6346	6.63256	FALSE	44574.3	TRUE	3	25					41.3349	0.994154	-3.6398	88.2523	0.739349	0.055821	FALSE
330	N18	Sample 62	32.6282	N2	FAM	UNKNOWN	FAM	NFQ-MGB	Amp	35.8257	35.7037	0.96295	0.282527	35.6346	6.63256	FALSE	44574.3	TRUE	3	28					41.3349	0.994154	-3.6398	88.2523	0.739349	0.055821	FALSE
352	O16	Sample 63		N2	FAM	UNKNOWN	FAM	NFQ-MGB	No Amp	Undetermined	39.8771	0				FALSE	44574.3	TRUE	3	39					41.3349	0.994154	-3.6398	88.2523	0.739349	0.055821	FALSE		Sample 63	Liver	Male	2.4	0.5	100	150	1200	3	100	55	MADKV21
353	O17	Sample 63	2.51486	N2	FAM	UNKNOWN	FAM	NFQ-MGB	Inconclusive	39.8771	39.8771	0				FALSE	44574.3	TRUE	3	29					41.3349	0.994154	-3.6398	88.2523	0.739349	0.055821	FALSE
354	O18	Sample 63		N2	FAM	UNKNOWN	FAM	NFQ-MGB	No Amp	Undetermined	39.8771	0				FALSE	44574.3	TRUE	3	39					41.3349	0.994154	-3.6398	88.2523	0.739349	0.055821	FALSE
19	A19	Sample 64		N2	FAM	UNKNOWN	FAM	NFQ-MGB	No Amp	Undetermined		0				FALSE	44574.3	TRUE	3	39					41.3349	0.994154	-3.6398	88.2523	0.739349	0.055821	FALSE		Sample 64	Kidney	Male	3.4	0	100	150	1200	3	100	23	MADKV21
20	A20	Sample 64		N2	FAM	UNKNOWN	FAM	NFQ-MGB	No Amp	Undetermined		0				FALSE	44574.3	TRUE	3	39					41.3349	0.994154	-3.6398	88.2523	0.739349	0.055821	FALSE
21	A21	Sample 64		N2	FAM	UNKNOWN	FAM	NFQ-MGB	No Amp	Undetermined		0				FALSE	44574.3	TRUE	3	39					41.3349	0.994154	-3.6398	88.2523	0.739349	0.055821	FALSE
43	B19	Sample 65	22.562	N2	FAM	UNKNOWN	FAM	NFQ-MGB	Amp	36.4089	36.2987	0.949686	0.367944	24.6429	5.95759	FALSE	44574.3	TRUE	3	25					41.3349	0.994154	-3.6398	88.2523	0.739349	0.055821	FALSE		Sample 65	Spleen	Male	3.4	4	100	150	1200	3	100	9	MADKV21
44	B20	Sample 65	31.3618	N2	FAM	UNKNOWN	FAM	NFQ-MGB	Amp	35.8883	36.2987	0.972335	0.367944	24.6429	5.95759	FALSE	44574.3	TRUE	3	27					41.3349	0.994154	-3.6398	88.2523	0.739349	0.055821	FALSE
45	B21	Sample 65	20.0049	N2	FAM	UNKNOWN	FAM	NFQ-MGB	Amp	36.599	36.2987	0.959032	0.367944	24.6429	5.95759	FALSE	44574.3	TRUE	3	29					41.3349	0.994154	-3.6398	88.2523	0.739349	0.055821	FALSE
67	C19	Sample 66		N2	FAM	UNKNOWN	FAM	NFQ-MGB	No Amp	Undetermined		0				FALSE	44574.3	TRUE	3	39					41.3349	0.994154	-3.6398	88.2523	0.739349	0.055821	FALSE		Sample 66	Duodnum	Male	3.4	0.5	100	150	1200	3	100	20	MADKV21
68	C20	Sample 66		N2	FAM	UNKNOWN	FAM	NFQ-MGB	No Amp	Undetermined		0				FALSE	44574.3	TRUE	3	39					41.3349	0.994154	-3.6398	88.2523	0.739349	0.055821	FALSE
69	C21	Sample 66		N2	FAM	UNKNOWN	FAM	NFQ-MGB	No Amp	Undetermined		0				FALSE	44574.3	TRUE	3	39					41.3349	0.994154	-3.6398	88.2523	0.739349	0.055821	FALSE
91	D19	Sample 67	65.2744	N2	FAM	UNKNOWN	FAM	NFQ-MGB	Amp	34.7296	34.6926	0.962838	0.138823	66.9925	5.97247	FALSE	44574.3	TRUE	3	25					41.3349	0.994154	-3.6398	88.2523	0.739349	0.055821	FALSE		Sample 67	Stomach	Male	3.4	0.5	100	150	1200	3	100	32	MADKV21
92	D20	Sample 67	62.0674	N2	FAM	UNKNOWN	FAM	NFQ-MGB	Amp	34.8092	34.6926	0.965529	0.138823	66.9925	5.97247	FALSE	44574.3	TRUE	3	29					41.3349	0.994154	-3.6398	88.2523	0.739349	0.055821	FALSE
93	D21	Sample 67	73.6357	N2	FAM	UNKNOWN	FAM	NFQ-MGB	Amp	34.5391	34.6926	0.970732	0.138823	66.9925	5.97247	FALSE	44574.3	TRUE	3	22					41.3349	0.994154	-3.6398	88.2523	0.739349	0.055821	FALSE
115	E19	Sample 68	224090	N2	FAM	UNKNOWN	FAM	NFQ-MGB	Amp	21.8604	21.8744	0.990045	0.0203128	222126	2844.32	FALSE	44574.3	TRUE	3	12					41.3349	0.994154	-3.6398	88.2523	0.739349	0.055821	FALSE		Sample 68	Lung	Male	3.4	0.763359	100	150	1200	3	100	42	MADKV21
116	E20	Sample 68	218864	N2	FAM	UNKNOWN	FAM	NFQ-MGB	Amp	21.8977	21.8744	0.988823	0.0203128	222126	2844.32	FALSE	44574.3	TRUE	3	13					41.3349	0.994154	-3.6398	88.2523	0.739349	0.055821	FALSE
117	E21	Sample 68	223424	N2	FAM	UNKNOWN	FAM	NFQ-MGB	Amp	21.8651	21.8744	0.991615	0.0203128	222126	2844.32	FALSE	44574.3	TRUE	3	12					41.3349	0.994154	-3.6398	88.2523	0.739349	0.055821	FALSE
139	F19	Sample 69	14.4902	N2	FAM	UNKNOWN	FAM	NFQ-MGB	Amp	37.1088	37.6545	0.950104	0.618188	10.77	3.90136	FALSE	44574.3	TRUE	3	29					41.3349	0.994154	-3.6398	88.2523	0.739349	0.055821	FALSE		Sample 69	Heart	Male	3.4	5.7	100	150	1200	3	100	33	MADKV21
140	F20	Sample 69	11.1101	N2	FAM	UNKNOWN	FAM	NFQ-MGB	Amp	37.5287	37.6545	0.942093	0.618188	10.77	3.90136	FALSE	44574.3	TRUE	3	27					41.3349	0.994154	-3.6398	88.2523	0.739349	0.055821	FALSE
141	F21	Sample 69	6.70972	N2	FAM	UNKNOWN	FAM	NFQ-MGB	Inconclusive	38.3259	37.6545	0.755212	0.618188	10.77	3.90136	FALSE	44574.3	TRUE	3	29					41.3349	0.994154	-3.6398	88.2523	0.739349	0.055821	FALSE
163	G19	Sample 70		N2	FAM	UNKNOWN	FAM	NFQ-MGB	No Amp	Undetermined	38.4062	0				FALSE	44574.3	TRUE	3	39					41.3349	0.994154	-3.6398	88.2523	0.739349	0.055821	FALSE		Sample 70	Liver	Male	3.4	0.5	100	150	1200	3	100	63	MADKV21
164	G20	Sample 70	6.37734	N2	FAM	UNKNOWN	FAM	NFQ-MGB	Inconclusive	38.4062	38.4062	0.655463				FALSE	44574.3	TRUE	3	31					41.3349	0.994154	-3.6398	88.2523	0.739349	0.055821	FALSE
165	G21	Sample 70		N2	FAM	UNKNOWN	FAM	NFQ-MGB	No Amp	Undetermined	38.4062	0				FALSE	44574.3	TRUE	3	39					41.3349	0.994154	-3.6398	88.2523	0.739349	0.055821	FALSE
211	I19	Sample 71		N2	FAM	UNKNOWN	FAM	NFQ-MGB	No Amp	Undetermined	39.0174	0	0.707913			FALSE	44574.3	TRUE	3	39					41.3349	0.994154	-3.6398	88.2523	0.739349	0.055821	FALSE		Sample 71	Kidney	Male	2.7	0.5	100	150	1200	3	100	97	MADKV21
212	I20	Sample 71	3.15627	N2	FAM	UNKNOWN	FAM	NFQ-MGB	Inconclusive	39.518	39.0174	0	0.707913			FALSE	44574.3	TRUE	3	32					41.3349	0.994154	-3.6398	88.2523	0.739349	0.055821	FALSE
213	I21	Sample 71	5.94604	N2	FAM	UNKNOWN	FAM	NFQ-MGB	Inconclusive	38.5169	39.0174	0.576794	0.707913			FALSE	44574.3	TRUE	3	29					41.3349	0.994154	-3.6398	88.2523	0.739349	0.055821	FALSE
235	J19	Sample 72	2.60136	N2	FAM	UNKNOWN	FAM	NFQ-MGB	Inconclusive	39.8237	38.7592	0	1.50534			FALSE	44574.3	TRUE	3	30					41.3349	0.994154	-3.6398	88.2523	0.739349	0.055821	FALSE		Sample 72	Spleen	Male	2.7	4.9	100	150	1200	3	100	9	MADKV21
236	J20	Sample 72	10.002	N2	FAM	UNKNOWN	FAM	NFQ-MGB	Inconclusive	37.6948	38.7592	0.931585	1.50534			FALSE	44574.3	TRUE	3	30					41.3349	0.994154	-3.6398	88.2523	0.739349	0.055821	FALSE
237	J21	Sample 72		N2	FAM	UNKNOWN	FAM	NFQ-MGB	No Amp	Undetermined	38.7592	0	1.50534			FALSE	44574.3	TRUE	3	39					41.3349	0.994154	-3.6398	88.2523	0.739349	0.055821	FALSE
259	K19	Sample 73		N2	FAM	UNKNOWN	FAM	NFQ-MGB	No Amp	Undetermined		0				FALSE	44574.3	TRUE	3	39					41.3349	0.994154	-3.6398	88.2523	0.739349	0.055821	FALSE		Sample 73	Duodnum	Male	2.7	0.5	100	150	1200	3	100	18	MADKV21
260	K20	Sample 73		N2	FAM	UNKNOWN	FAM	NFQ-MGB	No Amp	Undetermined		0				FALSE	44574.3	TRUE	3	39					41.3349	0.994154	-3.6398	88.2523	0.739349	0.055821	FALSE
261	K21	Sample 73		N2	FAM	UNKNOWN	FAM	NFQ-MGB	No Amp	Undetermined		0				FALSE	44574.3	TRUE	3	39					41.3349	0.994154	-3.6398	88.2523	0.739349	0.055821	FALSE
283	L19	Sample 74	148.682	N2	FAM	UNKNOWN	FAM	NFQ-MGB	Amp	33.4283	33.391	0.966099	0.152901	152.715	14.9974	FALSE	44574.3	TRUE	3	26					41.3349	0.994154	-3.6398	88.2523	0.739349	0.055821	FALSE		Sample 74	Stomach	Male	2.7	0.9	100	150	1200	3	100	36	MADKV21
284	L20	Sample 74	140.146	N2	FAM	UNKNOWN	FAM	NFQ-MGB	Amp	33.5218	33.391	0.970045	0.152901	152.715	14.9974	FALSE	44574.3	TRUE	3	27					41.3349	0.994154	-3.6398	88.2523	0.739349	0.055821	FALSE
285	L21	Sample 74	169.317	N2	FAM	UNKNOWN	FAM	NFQ-MGB	Amp	33.2229	33.391	0.970312	0.152901	152.715	14.9974	FALSE	44574.3	TRUE	3	26					41.3349	0.994154	-3.6398	88.2523	0.739349	0.055821	FALSE
307	M19	Sample 75	13981.1	N2	FAM	UNKNOWN	FAM	NFQ-MGB	Amp	26.246	26.2311	0.983694	0.0723214	14123.2	650.339	FALSE	44574.3	TRUE	3	19					41.3349	0.994154	-3.6398	88.2523	0.739349	0.055821	FALSE		Sample 75	Lung	Male	2.7	0.692042	100	150	1200	3	100	33	MADKV21
308	M20	Sample 75	14832.9	N2	FAM	UNKNOWN	FAM	NFQ-MGB	Amp	26.1525	26.2311	0.981526	0.0723214	14123.2	650.339	FALSE	44574.3	TRUE	3	18					41.3349	0.994154	-3.6398	88.2523	0.739349	0.055821	FALSE
309	M21	Sample 75	13555.7	N2	FAM	UNKNOWN	FAM	NFQ-MGB	Amp	26.2948	26.2311	0.983411	0.0723214	14123.2	650.339	FALSE	44574.3	TRUE	3	18					41.3349	0.994154	-3.6398	88.2523	0.739349	0.055821	FALSE
331	N19	Sample 76		N2	FAM	UNKNOWN	FAM	NFQ-MGB	No Amp	Undetermined		0				FALSE	44574.3	TRUE	3	39					41.3349	0.994154	-3.6398	88.2523	0.739349	0.055821	FALSE		Sample 76	Heart	Male	2.7	9.9	100	150	1200	3	100	28	MADKV21
332	N20	Sample 76		N2	FAM	UNKNOWN	FAM	NFQ-MGB	No Amp	Undetermined		0				FALSE	44574.3	TRUE	3	39					41.3349	0.994154	-3.6398	88.2523	0.739349	0.055821	FALSE
333	N21	Sample 76		N2	FAM	UNKNOWN	FAM	NFQ-MGB	No Amp	Undetermined		0				FALSE	44574.3	TRUE	3	39					41.3349	0.994154	-3.6398	88.2523	0.739349	0.055821	FALSE
355	O19	Sample 77		N2	FAM	UNKNOWN	FAM	NFQ-MGB	No Amp	Undetermined		0				FALSE	44574.3	TRUE	3	39					41.3349	0.994154	-3.6398	88.2523	0.739349	0.055821	FALSE		Sample 77	Liver	Male	2.7	0.5	100	150	1200	3	100	48	MADKV21
356	O20	Sample 77		N2	FAM	UNKNOWN	FAM	NFQ-MGB	No Amp	Undetermined		0				FALSE	44574.3	TRUE	3	39					41.3349	0.994154	-3.6398	88.2523	0.739349	0.055821	FALSE
357	O21	Sample 77		N2	FAM	UNKNOWN	FAM	NFQ-MGB	No Amp	Undetermined		0				FALSE	44574.3	TRUE	3	32					41.3349	0.994154	-3.6398	88.2523	0.739349	0.055821	FALSE
22	A22	Sample 78		N2	FAM	UNKNOWN	FAM	NFQ-MGB	No Amp	Undetermined		0				FALSE	44574.3	TRUE	3	39					41.3349	0.994154	-3.6398	88.2523	0.739349	0.055821	FALSE		Sample 78	Kidney	Male	3.7	0	100	150	1200	3	100	45	MADKV21
23	A23	Sample 78		N2	FAM	UNKNOWN	FAM	NFQ-MGB	No Amp	Undetermined		0				FALSE	44574.3	TRUE	3	39					41.3349	0.994154	-3.6398	88.2523	0.739349	0.055821	FALSE
24	A24	Sample 78		N2	FAM	UNKNOWN	FAM	NFQ-MGB	No Amp	Undetermined		0				FALSE	44574.3	TRUE	3	39					41.3349	0.994154	-3.6398	88.2523	0.739349	0.055821	FALSE
46	B22	Sample 79		N2	FAM	UNKNOWN	FAM	NFQ-MGB	No Amp	Undetermined		0				FALSE	44574.3	TRUE	3	39					41.3349	0.994154	-3.6398	88.2523	0.739349	0.055821	FALSE		Sample 79	Spleen	Male	3.7	4	100	150	1200	3	100	18	MADKV21
47	B23	Sample 79		N2	FAM	UNKNOWN	FAM	NFQ-MGB	No Amp	Undetermined		0				FALSE	44574.3	TRUE	3	39					41.3349	0.994154	-3.6398	88.2523	0.739349	0.055821	FALSE
48	B24	Sample 79		N2	FAM	UNKNOWN	FAM	NFQ-MGB	No Amp	Undetermined		0				FALSE	44574.3	TRUE	3	39					41.3349	0.994154	-3.6398	88.2523	0.739349	0.055821	FALSE
70	C22	Sample 80	49.872	N2	FAM	UNKNOWN	FAM	NFQ-MGB	Amp	35.155	35.5294	0.972436	0.516699	40.6909	12.0056	FALSE	44574.3	TRUE	3	24					41.3349	0.994154	-3.6398	88.2523	0.739349	0.055821	FALSE		Sample 80	Duodnum	Male	3.7	1.3	100	150	1200	3	100	7	MADKV21
71	C23	Sample 80	27.1051	N2	FAM	UNKNOWN	FAM	NFQ-MGB	Amp	36.1189	35.5294	0.958147	0.516699	40.6909	12.0056	FALSE	44574.3	TRUE	3	29					41.3349	0.994154	-3.6398	88.2523	0.739349	0.055821	FALSE
72	C24	Sample 80	45.0957	N2	FAM	UNKNOWN	FAM	NFQ-MGB	Amp	35.3142	35.5294	0.970443	0.516699	40.6909	12.0056	FALSE	44574.3	TRUE	3	29					41.3349	0.994154	-3.6398	88.2523	0.739349	0.055821	FALSE
94	D22	Sample 81	11.213	N2	FAM	UNKNOWN	FAM	NFQ-MGB	Amp	37.5141	37.3125	0.925063	0.945195	14.398	8.88517	FALSE	44574.3	TRUE	3	29					41.3349	0.994154	-3.6398	88.2523	0.739349	0.055821	FALSE		Sample 81	Stomach	Male	3.7	0.5	100	150	1200	3	100	69	MADKV21
95	D23	Sample 81	7.5443	N2	FAM	UNKNOWN	FAM	NFQ-MGB	Inconclusive	38.1405	37.3125	0.88765	0.945195	14.398	8.88517	FALSE	44574.3	TRUE	3	30					41.3349	0.994154	-3.6398	88.2523	0.739349	0.055821	FALSE
96	D24	Sample 81	24.4367	N2	FAM	UNKNOWN	FAM	NFQ-MGB	Amp	36.2827	37.3125	0.957202	0.945195	14.398	8.88517	FALSE	44574.3	TRUE	3	26					41.3349	0.994154	-3.6398	88.2523	0.739349	0.055821	FALSE
118	E22	Sample 82	6831.5	N2	FAM	UNKNOWN	FAM	NFQ-MGB	Amp	27.378	27.3385	0.97994	0.0887519	7011.97	399.404	FALSE	44574.3	TRUE	3	19					41.3349	0.994154	-3.6398	88.2523	0.739349	0.055821	FALSE		Sample 82	Lung	Male	3.7	0.444444	100	150	1200	3	100	18	MADKV21
119	E23	Sample 82	6734.66	N2	FAM	UNKNOWN	FAM	NFQ-MGB	Amp	27.4006	27.3385	0.974639	0.0887519	7011.97	399.404	FALSE	44574.3	TRUE	3	17					41.3349	0.994154	-3.6398	88.2523	0.739349	0.055821	FALSE
120	E24	Sample 82	7469.76	N2	FAM	UNKNOWN	FAM	NFQ-MGB	Amp	27.2368	27.3385	0.981452	0.0887519	7011.97	399.404	FALSE	44574.3	TRUE	3	18					41.3349	0.994154	-3.6398	88.2523	0.739349	0.055821	FALSE
142	F22	Sample 83	10.8776	N2	FAM	UNKNOWN	FAM	NFQ-MGB	Amp	37.5621	37.5621	0.949576				FALSE	44574.3	TRUE	3	28					41.3349	0.994154	-3.6398	88.2523	0.739349	0.055821	FALSE		Sample 83	Heart	Male	3.7	7.7	100	150	1200	3	100	26	MADKV21
143	F23	Sample 83		N2	FAM	UNKNOWN	FAM	NFQ-MGB	No Amp	Undetermined	37.5621	0				FALSE	44574.3	TRUE	3	39					41.3349	0.994154	-3.6398	88.2523	0.739349	0.055821	FALSE
144	F24	Sample 83		N2	FAM	UNKNOWN	FAM	NFQ-MGB	No Amp	Undetermined	37.5621	0				FALSE	44574.3	TRUE	3	39					41.3349	0.994154	-3.6398	88.2523	0.739349	0.055821	FALSE
166	G22	Sample 84		N2	FAM	UNKNOWN	FAM	NFQ-MGB	No Amp	Undetermined		0				FALSE	44574.3	TRUE	3	39					41.3349	0.994154	-3.6398	88.2523	0.739349	0.055821	FALSE		Sample 84	Liver	Male	3.7	5.9	100	150	1200	3	100	12	MADKV21
167	G23	Sample 84		N2	FAM	UNKNOWN	FAM	NFQ-MGB	No Amp	Undetermined		0				FALSE	44574.3	TRUE	3	39					41.3349	0.994154	-3.6398	88.2523	0.739349	0.055821	FALSE
168	G24	Sample 84		N2	FAM	UNKNOWN	FAM	NFQ-MGB	No Amp	Undetermined		0				FALSE	44574.3	TRUE	3	39					41.3349	0.994154	-3.6398	88.2523	0.739349	0.055821	FALSE
289	M1			N2	FAM	NTC	FAM	NFQ-MGB	No Amp	Undetermined		0				FALSE	44574.3	TRUE	3	39					41.3349	0.994154	-3.6398	88.2523	0.739349	0.055821	FALSE
290	M2			N2	FAM	NTC	FAM	NFQ-MGB	No Amp	Undetermined		0				FALSE	44574.3	TRUE	3	39					41.3349	0.994154	-3.6398	88.2523	0.739349	0.055821	FALSE
291	M3			N2	FAM	NTC	FAM	NFQ-MGB	No Amp	Undetermined		0				FALSE	44574.3	TRUE	3	39					41.3349	0.994154	-3.6398	88.2523	0.739349	0.055821	FALSE
Block Type	384-Well Block
Calibration Background is expired	No
Calibration Background performed on	01-27-2021
Calibration Pure Dye ABY is expired	No
Calibration Pure Dye ABY performed on	01-27-2021
Calibration Pure Dye CY5 is expired	No
Calibration Pure Dye CY5 performed on	01-27-2021
Calibration Pure Dye FAM is expired	No
Calibration Pure Dye FAM performed on	01-27-2021
Calibration Pure Dye JUN is expired	No
Calibration Pure Dye JUN performed on	01-27-2021
Calibration Pure Dye MUSTANG PURPLE is expired	No
Calibration Pure Dye MUSTANG PURPLE performed on	01-27-2021
Calibration Pure Dye NED is expired	No
Calibration Pure Dye NED performed on	01-27-2021
Calibration Pure Dye ROX is expired	No
Calibration Pure Dye ROX performed on	01-27-2021
Calibration Pure Dye SYBR is expired	No
Calibration Pure Dye SYBR performed on	01-27-2021
Calibration Pure Dye TAMRA is expired	No
Calibration Pure Dye TAMRA performed on	01-27-2021
Calibration Pure Dye VIC is expired	No
Calibration Pure Dye VIC performed on	01-27-2021
Calibration ROI is expired	No
Calibration ROI performed on	01-27-2021
Calibration Uniformity is expired	No
Calibration Uniformity performed on	01-27-2021
Chemistry	TAQMAN
Date Created	2022-01-05 12:43:22 PM PST
Experiment Barcode
Experiment Comment
Experiment File Name	X:\TheLounge\Personal_Sharing Folders\Megan K\QuantStudio5\MADKV20M21M N2 TITER.eds
Experiment Name	MADKV20M21M N2 TITER
Experiment Run End Time	2022-01-04 15:53:22 PM PST
Experiment Type	Standard Curve
Instrument Name	Gale-Lab-QuantStudio
Instrument Serial Number	272532607
Instrument Type	QuantStudio™ 5 System
Passive Reference	ROX
Post-read Stage/Step
Pre-read Stage/Step
Quantification Cycle Method	Ct
Signal Smoothing On	true
Stage where Melt Analysis is performed	Stage3
Stage/ Cycle where Ct Analysis is performed	Stage2, Step2
User Name
Well	Well Position	Omit	Sample Name	Target Name	Task	Reporter	Quencher	CT	Ct Mean	Ct SD	Quantity	Quantity Mean	Quantity SD	Y-Intercept	R(superscript 2)	Slope	Efficiency	Automatic Ct Threshold	Ct Threshold	Automatic Baseline	Baseline Start	Baseline End	Amp Status	Comments	Cq Conf	CQCONF	HIGHSD	EXPFAIL	NOAMP	Tm1	Tm2	Tm3	Tm4	Sample	Tissue	Gender	Label	uL RNA for 200ng	uL cDNA	uL Sample input uL	Trizol/Chloroform total Volume	uL cDNA/well	uL RNA eluted	Tissue weight mg	MADKV21
1	A1	FALSE		N2	STANDARD	FAM	NFQ-MGB	10.4277	10.5132	0.0781362	150000000			38.2349	0.9989	-3.4281	95.7523	FALSE	0.1	TRUE	3	7	Amp		0.729021	Y	N	N	N
2	A2	FALSE		N2	STANDARD	FAM	NFQ-MGB	10.5808	10.5132	0.0781362	150000000			38.2349	0.9989	-3.4281	95.7523	FALSE	0.1	TRUE	3	7	Amp		0.78272	Y	N	N	N
3	A3	FALSE		N2	STANDARD	FAM	NFQ-MGB	10.5312	10.5132	0.0781362	150000000			38.2349	0.9989	-3.4281	95.7523	FALSE	0.1	TRUE	3	7	Amp		0.764159	Y	N	N	N
25	B1	FALSE		N2	STANDARD	FAM	NFQ-MGB	13.6063	13.3944	0.224511	15000000			38.2349	0.9989	-3.4281	95.7523	FALSE	0.1	TRUE	3	10	Amp		0.832681	N	N	N	N
26	B2	FALSE		N2	STANDARD	FAM	NFQ-MGB	13.1591	13.3944	0.224511	15000000			38.2349	0.9989	-3.4281	95.7523	FALSE	0.1	TRUE	3	8	Amp		0.792395	Y	N	N	N
27	B3	FALSE		N2	STANDARD	FAM	NFQ-MGB	13.4178	13.3944	0.224511	15000000			38.2349	0.9989	-3.4281	95.7523	FALSE	0.1	TRUE	3	9	Amp		0.819979	N	N	N	N
49	C1	FALSE		N2	STANDARD	FAM	NFQ-MGB	17.0161	17.0004	0.107922	1500000			38.2349	0.9989	-3.4281	95.7523	FALSE	0.1	TRUE	3	13	Amp		0.889539	N	N	N	N
50	C2	FALSE		N2	STANDARD	FAM	NFQ-MGB	16.8855	17.0004	0.107922	1500000			38.2349	0.9989	-3.4281	95.7523	FALSE	0.1	TRUE	3	13	Amp		0.880903	N	N	N	N
51	C3	FALSE		N2	STANDARD	FAM	NFQ-MGB	17.0996	17.0004	0.107922	1500000			38.2349	0.9989	-3.4281	95.7523	FALSE	0.1	TRUE	3	13	Amp		0.910694	N	N	N	N
73	D1	FALSE		N2	STANDARD	FAM	NFQ-MGB	20.4738	20.4532	0.208856	150000			38.2349	0.9989	-3.4281	95.7523	FALSE	0.1	TRUE	3	16	Amp		0.96983	N	N	N	N
74	D2	FALSE		N2	STANDARD	FAM	NFQ-MGB	20.2349	20.4532	0.208856	150000			38.2349	0.9989	-3.4281	95.7523	FALSE	0.1	TRUE	3	16	Amp		0.937929	N	N	N	N
75	D3	FALSE		N2	STANDARD	FAM	NFQ-MGB	20.6511	20.4532	0.208856	150000			38.2349	0.9989	-3.4281	95.7523	FALSE	0.1	TRUE	3	16	Amp		0.978552	N	N	N	N
97	E1	FALSE		N2	STANDARD	FAM	NFQ-MGB	23.9885	23.8771	0.11144	15000			38.2349	0.9989	-3.4281	95.7523	FALSE	0.1	TRUE	3	20	Amp		0.980126	N	N	N	N
98	E2	FALSE		N2	STANDARD	FAM	NFQ-MGB	23.8772	23.8771	0.11144	15000			38.2349	0.9989	-3.4281	95.7523	FALSE	0.1	TRUE	3	20	Amp		0.986567	N	N	N	N
99	E3	FALSE		N2	STANDARD	FAM	NFQ-MGB	23.7656	23.8771	0.11144	15000			38.2349	0.9989	-3.4281	95.7523	FALSE	0.1	TRUE	3	19	Amp		0.989424	N	N	N	N
121	F1	FALSE		N2	STANDARD	FAM	NFQ-MGB	27.2899	27.2739	0.12577	1500			38.2349	0.9989	-3.4281	95.7523	FALSE	0.1	TRUE	3	23	Amp		0.982049	N	N	N	N
122	F2	FALSE		N2	STANDARD	FAM	NFQ-MGB	27.1408	27.2739	0.12577	1500			38.2349	0.9989	-3.4281	95.7523	FALSE	0.1	TRUE	3	23	Amp		0.984737	N	N	N	N
123	F3	FALSE		N2	STANDARD	FAM	NFQ-MGB	27.3908	27.2739	0.12577	1500			38.2349	0.9989	-3.4281	95.7523	FALSE	0.1	TRUE	3	24	Amp		0.972956	N	N	N	N
145	G1	FALSE		N2	STANDARD	FAM	NFQ-MGB	30.8498	30.7868	0.0546301	150			38.2349	0.9989	-3.4281	95.7523	FALSE	0.1	TRUE	3	25	Amp		0.973251	N	N	N	N
146	G2	FALSE		N2	STANDARD	FAM	NFQ-MGB	30.7548	30.7868	0.0546301	150			38.2349	0.9989	-3.4281	95.7523	FALSE	0.1	TRUE	3	27	Amp		0.978385	N	N	N	N
147	G3	FALSE		N2	STANDARD	FAM	NFQ-MGB	30.7556	30.7868	0.0546301	150			38.2349	0.9989	-3.4281	95.7523	FALSE	0.1	TRUE	3	27	Amp		0.982572	N	N	N	N
169	H1	FALSE		N2	STANDARD	FAM	NFQ-MGB	34.855	34.2335	0.579237	15			38.2349	0.9989	-3.4281	95.7523	FALSE	0.1	TRUE	3	30	Amp		0.967742	N	Y	N	N
170	H2	FALSE		N2	STANDARD	FAM	NFQ-MGB	33.7087	34.2335	0.579237	15			38.2349	0.9989	-3.4281	95.7523	FALSE	0.1	TRUE	3	29	Amp		0.96441		Y	N	N
171	H3	FALSE		N2	STANDARD	FAM	NFQ-MGB	34.1368	34.2335	0.579237	15			38.2349	0.9989	-3.4281	95.7523	FALSE	0.1	TRUE	3	30	Amp		0.959908	N	Y	N	N
193	I1	FALSE		N2	STANDARD	FAM	NFQ-MGB	35.6568	35.4983	0.224151	7.5			38.2349	0.9989	-3.4281	95.7523	FALSE	0.1	TRUE	3	31	Amp		0.945929	N	N	N	N
194	I2	FALSE		N2	STANDARD	FAM	NFQ-MGB	35.3398	35.4983	0.224151	7.5			38.2349	0.9989	-3.4281	95.7523	FALSE	0.1	TRUE	3	30	Amp		0.963443	N	N	N	N
195	I3	FALSE		N2	STANDARD	FAM	NFQ-MGB	Undetermined	35.4983	0.224151	7.5			38.2349	0.9989	-3.4281	95.7523	FALSE	0.1	TRUE	3	39	No Amp		0	Y	N	Y	Y
217	J1	FALSE		N2	STANDARD	FAM	NFQ-MGB	35.936	36.4133	0.432692	3.75			38.2349	0.9989	-3.4281	95.7523	FALSE	0.1	TRUE	3	31	Amp		0.933263	N	N	N	N
218	J2	FALSE		N2	STANDARD	FAM	NFQ-MGB	36.524	36.4133	0.432692	3.75			38.2349	0.9989	-3.4281	95.7523	FALSE	0.1	TRUE	3	32	Inconclusive		0.953557	N	N	N	N
219	J3	FALSE		N2	STANDARD	FAM	NFQ-MGB	36.7799	36.4133	0.432692	3.75			38.2349	0.9989	-3.4281	95.7523	FALSE	0.1	TRUE	3	32	Inconclusive		0.934489	N	N	N	N
241	K1	FALSE		N2	STANDARD	FAM	NFQ-MGB	37.248	36.9066	0.302727	1.875			38.2349	0.9989	-3.4281	95.7523	FALSE	0.1	TRUE	3	32	Inconclusive		0.918899	N	N	N	N
242	K2	FALSE		N2	STANDARD	FAM	NFQ-MGB	36.6709	36.9066	0.302727	1.875			38.2349	0.9989	-3.4281	95.7523	FALSE	0.1	TRUE	3	33	Inconclusive		0.949001	N	N	N	N
243	K3	FALSE		N2	STANDARD	FAM	NFQ-MGB	36.8008	36.9066	0.302727	1.875			38.2349	0.9989	-3.4281	95.7523	FALSE	0.1	TRUE	3	33	Inconclusive		0.930219	N	N	N	N
265	L1	FALSE		N2	STANDARD	FAM	NFQ-MGB	38.8545	38.8545		0.9375			38.2349	0.9989	-3.4281	95.7523	FALSE	0.1	TRUE	3	35	No Amp		0.16125	Y	N	N	N
266	L2	FALSE		N2	STANDARD	FAM	NFQ-MGB	Undetermined	38.8545		0.9375			38.2349	0.9989	-3.4281	95.7523	FALSE	0.1	TRUE	3	39	No Amp		0	Y	N	Y	Y
267	L3	FALSE		N2	STANDARD	FAM	NFQ-MGB	Undetermined	38.8545		0.9375			38.2349	0.9989	-3.4281	95.7523	FALSE	0.1	TRUE	3	39	No Amp		0	Y	N	Y	Y
10	A10	FALSE	Sample 17	N2	UNKNOWN	FAM	NFQ-MGB	Undetermined						38.2349	0.9989	-3.4281	95.7523	FALSE	0.1	TRUE	3	39	No Amp		0	Y	N	Y	Y					Sample 17	Lung	Male	1.M	1.34228	100	150	1200	3	100	39	MADKV21
11	A11	FALSE	Sample 17	N2	UNKNOWN	FAM	NFQ-MGB	Undetermined						38.2349	0.9989	-3.4281	95.7523	FALSE	0.1	TRUE	3	39	No Amp		0	Y	N	Y	Y					Sample 17
12	A12	FALSE	Sample 17	N2	UNKNOWN	FAM	NFQ-MGB	Undetermined						38.2349	0.9989	-3.4281	95.7523	FALSE	0.1	TRUE	3	39	No Amp		0	Y	N	Y	Y					Sample 17
34	B10	FALSE	Sample 18	N2	UNKNOWN	FAM	NFQ-MGB	Undetermined						38.2349	0.9989	-3.4281	95.7523	FALSE	0.1	TRUE	3	15	No Amp		0	Y	N	N	Y					Sample 18	Lung	Male	2.M	1.14286	100	150	1200	3	100	41	MADKV21
35	B11	FALSE	Sample 18	N2	UNKNOWN	FAM	NFQ-MGB	Undetermined						38.2349	0.9989	-3.4281	95.7523	FALSE	0.1	TRUE	3	39	No Amp		0	Y	N	Y	Y					Sample 18
36	B12	FALSE	Sample 18	N2	UNKNOWN	FAM	NFQ-MGB	Undetermined						38.2349	0.9989	-3.4281	95.7523	FALSE	0.1	TRUE	3	39	No Amp		0	Y	N	Y	Y					Sample 18
58	C10	FALSE	Sample 19	N2	UNKNOWN	FAM	NFQ-MGB	Undetermined						38.2349	0.9989	-3.4281	95.7523	FALSE	0.1	TRUE	3	39	No Amp		0	Y	N	Y	Y					Sample 19	Lung	Male	3.M	1.16279	100	150	1200	3	100	46	MADKV21
59	C11	FALSE	Sample 19	N2	UNKNOWN	FAM	NFQ-MGB	Undetermined						38.2349	0.9989	-3.4281	95.7523	FALSE	0.1	TRUE	3	39	No Amp		0	Y	N	Y	Y					Sample 19
60	C12	FALSE	Sample 19	N2	UNKNOWN	FAM	NFQ-MGB	Undetermined						38.2349	0.9989	-3.4281	95.7523	FALSE	0.1	TRUE	3	39	No Amp		0	Y	N	Y	Y					Sample 19
82	D10	FALSE	Sample 20	N2	UNKNOWN	FAM	NFQ-MGB	14.071	14.1862	0.107771	11188681	10373340	756642	38.2349	0.9989	-3.4281	95.7523	FALSE	0.1	TRUE	3	9	Amp		0.817175	N	N	N	N					Sample 20	Lung	Male	1.2	0.966184	100	150	1200	3	100	41	MADKV21
83	D11	FALSE	Sample 20	N2	UNKNOWN	FAM	NFQ-MGB	14.2845	14.1862	0.107771	9693785	10373340	756642	38.2349	0.9989	-3.4281	95.7523	FALSE	0.1	TRUE	3	10	Amp		0.855001	N	N	N	N					Sample 20
84	D12	FALSE	Sample 20	N2	UNKNOWN	FAM	NFQ-MGB	14.2032	14.1862	0.107771	10237556	10373340	756642	38.2349	0.9989	-3.4281	95.7523	FALSE	0.1	TRUE	3	10	Amp		0.832747	N	N	N	N					Sample 20
106	E10	FALSE	Sample 21	N2	UNKNOWN	FAM	NFQ-MGB	14.4309	14.3733	0.0590705	8786131	9137191	362995	38.2349	0.9989	-3.4281	95.7523	FALSE	0.1	TRUE	3	10	Amp		0.856852	N	N	N	N					Sample 21	Lung	Male	2.2	1.07527	100	150	1200	3	100	25	MADKV21
107	E11	FALSE	Sample 21	N2	UNKNOWN	FAM	NFQ-MGB	14.3128	14.3733	0.0590705	9511046	9137191	362995	38.2349	0.9989	-3.4281	95.7523	FALSE	0.1	TRUE	3	10	Amp		0.846124	N	N	N	N					Sample 21
108	E12	FALSE	Sample 21	N2	UNKNOWN	FAM	NFQ-MGB	14.3763	14.3733	0.0590705	9114395	9137191	362995	38.2349	0.9989	-3.4281	95.7523	FALSE	0.1	TRUE	3	10	Amp		0.848813	N	N	N	N					Sample 21
130	F10	FALSE	Sample 22	N2	UNKNOWN	FAM	NFQ-MGB	15.3227	15.2354	0.0950811	4.82658e+06	5125006	329388	38.2349	0.9989	-3.4281	95.7523	FALSE	0.1	TRUE	3	12	Amp		0.885497	N	N	N	N					Sample 22	Lung	Male	3.2	1.06383	100	150	1200	3	100	25	MADKV21
131	F11	FALSE	Sample 22	N2	UNKNOWN	FAM	NFQ-MGB	15.2495	15.2354	0.0950811	5.07001e+06	5125006	329388	38.2349	0.9989	-3.4281	95.7523	FALSE	0.1	TRUE	3	12	Amp		0.877708	N	N	N	N					Sample 22
132	F12	FALSE	Sample 22	N2	UNKNOWN	FAM	NFQ-MGB	15.1341	15.2354	0.0950811	5.47843e+06	5125006	329388	38.2349	0.9989	-3.4281	95.7523	FALSE	0.1	TRUE	3	11	Amp		0.866902	N	N	N	N					Sample 22
154	G10	FALSE	Sample 23	N2	UNKNOWN	FAM	NFQ-MGB	20.227	20.203	0.0413021	179077	182032	5089.66	38.2349	0.9989	-3.4281	95.7523	FALSE	0.1	TRUE	3	16	Amp		0.974751	N	N	N	N					Sample 23	Lung	Male	1.4	1.73913	100	150	1200	3	100	18	MADKV21
155	G11	FALSE	Sample 23	N2	UNKNOWN	FAM	NFQ-MGB	20.1553	20.203	0.0413021	187909	182032	5089.66	38.2349	0.9989	-3.4281	95.7523	FALSE	0.1	TRUE	3	15	Amp		0.956443	N	N	N	N					Sample 23
156	G12	FALSE	Sample 23	N2	UNKNOWN	FAM	NFQ-MGB	20.2267	20.203	0.0413021	179109	182032	5089.66	38.2349	0.9989	-3.4281	95.7523	FALSE	0.1	TRUE	3	15	Amp		0.959526	N	N	N	N					Sample 23
178	H10	FALSE	Sample 24	N2	UNKNOWN	FAM	NFQ-MGB	20.0402	20.0417	0.058786	203005	202917	8004.94	38.2349	0.9989	-3.4281	95.7523	FALSE	0.1	TRUE	3	16	Amp		0.965021	N	N	N	N					Sample 24	Lung	Male	2.4	0.560224	100	150	1200	3	100	45	MADKV21
179	H11	FALSE	Sample 24	N2	UNKNOWN	FAM	NFQ-MGB	20.1011	20.0417	0.058786	194868	202917	8004.94	38.2349	0.9989	-3.4281	95.7523	FALSE	0.1	TRUE	3	16	Amp		0.962199	N	N	N	N					Sample 24
180	H12	FALSE	Sample 24	N2	UNKNOWN	FAM	NFQ-MGB	19.9836	20.0417	0.058786	210877	202917	8004.94	38.2349	0.9989	-3.4281	95.7523	FALSE	0.1	TRUE	3	14	Amp		0.953192	N	N	N	N					Sample 24
202	I10	FALSE	Sample 25	N2	UNKNOWN	FAM	NFQ-MGB	20.9898	20.9746	0.0275916	107277	108391	2019.38	38.2349	0.9989	-3.4281	95.7523	FALSE	0.1	TRUE	3	17	Amp		0.988588	N	N	N	N					Sample 25	Lung	Male	3.4	0.763359	100	150	1200	3	100	42	MADKV21
203	I11	FALSE	Sample 25	N2	UNKNOWN	FAM	NFQ-MGB	20.9912	20.9746	0.0275916	107175	108391	2019.38	38.2349	0.9989	-3.4281	95.7523	FALSE	0.1	TRUE	3	17	Amp		0.983384	N	N	N	N					Sample 25
204	I12	FALSE	Sample 25	N2	UNKNOWN	FAM	NFQ-MGB	20.9428	20.9746	0.0275916	110722	108391	2019.38	38.2349	0.9989	-3.4281	95.7523	FALSE	0.1	TRUE	3	17	Amp		0.989762	N	N	N	N					Sample 25
226	J10	FALSE	Sample 26	N2	UNKNOWN	FAM	NFQ-MGB	24.9112	24.9247	0.0370348	7702.27	7634.26	188.768	38.2349	0.9989	-3.4281	95.7523	FALSE	0.1	TRUE	3	20	Amp		0.988378	N	N	N	N					Sample 26	Lung	Male	2.7	0.692042	100	150	1200	3	100	33	MADKV21
227	J11	FALSE	Sample 26	N2	UNKNOWN	FAM	NFQ-MGB	24.9666	24.9247	0.0370348	7420.91	7634.26	188.768	38.2349	0.9989	-3.4281	95.7523	FALSE	0.1	TRUE	3	20	Amp		0.985115	N	N	N	N					Sample 26
228	J12	FALSE	Sample 26	N2	UNKNOWN	FAM	NFQ-MGB	24.8963	24.9247	0.0370348	7779.6	7634.26	188.768	38.2349	0.9989	-3.4281	95.7523	FALSE	0.1	TRUE	3	20	Amp		0.977915	N	N	N	N					Sample 26
250	K10	FALSE	Sample 27	N2	UNKNOWN	FAM	NFQ-MGB	25.9278	25.9471	0.0246979	3891.04	3841.18	63.4789	38.2349	0.9989	-3.4281	95.7523	FALSE	0.1	TRUE	3	22	Amp		0.979559	N	N	N	N					Sample 27	Lung	Male	3.7	0.444444	100	150	1200	3	100	18	MADKV21
251	K11	FALSE	Sample 27	N2	UNKNOWN	FAM	NFQ-MGB	25.975	25.9471	0.0246979	3769.72	3841.18	63.4789	38.2349	0.9989	-3.4281	95.7523	FALSE	0.1	TRUE	3	23	Amp		0.985475	N	N	N	N					Sample 27
252	K12	FALSE	Sample 27	N2	UNKNOWN	FAM	NFQ-MGB	25.9386	25.9471	0.0246979	3862.78	3841.18	63.4789	38.2349	0.9989	-3.4281	95.7523	FALSE	0.1	TRUE	3	22	Amp		0.985674	N	N	N	N					Sample 27
274	L10	FALSE	Sample 28	N2	UNKNOWN	FAM	NFQ-MGB	Undetermined						38.2349	0.9989	-3.4281	95.7523	FALSE	0.1	TRUE	3	39	No Amp		0	Y	N	Y	Y					Sample 28
275	L11	FALSE	Sample 28	N2	UNKNOWN	FAM	NFQ-MGB	Undetermined						38.2349	0.9989	-3.4281	95.7523	FALSE	0.1	TRUE	3	39	No Amp		0	Y	N	Y	Y					Sample 28
276	L12	FALSE	Sample 28	N2	UNKNOWN	FAM	NFQ-MGB	Undetermined						38.2349	0.9989	-3.4281	95.7523	FALSE	0.1	TRUE	3	39	No Amp		0	Y	N	Y	Y					Sample 28
289	M1	FALSE		N2	NTC	FAM	NFQ-MGB	Undetermined						38.2349	0.9989	-3.4281	95.7523	FALSE	0.1	TRUE	3	34	No Amp		0	N	N	N	N
290	M2	FALSE		N2	NTC	FAM	NFQ-MGB	Undetermined						38.2349	0.9989	-3.4281	95.7523	FALSE	0.1	TRUE	3	39	No Amp		0	N	N	N	N
291	M3	FALSE		N2	NTC	FAM	NFQ-MGB	Undetermined						38.2349	0.9989	-3.4281	95.7523	FALSE	0.1	TRUE	3	39	No Amp		0	N	N	N	N
File Name	X:\TheLounge\Personal_Sharing Folders\Megan K\QuantStudio5\MADKV21F N2 TITER.eds
Comment
Operator	DEFAULT
Barcode
Instrument Type	QuantStudio™ 5 System
Block Type	384-Well Block
Instrument Name	Gale-Lab-QuantStudio
Instrument Serial Number	272532607
Heated Cover Serial Number
Block Serial Number	20525021
Run Start Date/Time	2022-02-11 12:05:24 PM PST
Run End Date/Time	2022-02-11 01:39:41 PM PST
Run Duration	94 minutes 17 seconds
Sample Volume	10.0
Cover Temperature	105.0
Passive Reference	NONE
PCR Stage/Step Number	Stage 2 Step 2
Quantification Cycle Method	CT
Analysis Date/Time	2022-02-11 03:25:09 PM PST
Software Name and Version	Design & Analysis Software v2.5.1
Plugin Name and Version	Primary Analysis v1.6.0, Standard Curve v1.5.1
Exported On	2022-02-11 03:25:21 PM PST
Well	Well Position	Sample	Quantity	Target	Dye	Task	Reporter	Quencher	Amp Status	Cq	Cq Mean	Cq Confidence	Cq SD	Quantity Mean	Quantity SD	Auto Threshold	Threshold	Auto Baseline	Baseline Start	Baseline End	Tm1	Tm2	Tm3	Tm4	Y-Intercept	R2	Slope	Efficiency	Standard Deviation	Standard Error	Omit	Sample	Tissue	Gender	Label	uL RNA for 200ng	uL cDNA	uL Sample input uL	Trizol/Chloroform total Volume	uL cDNA/well	uL RNA eluted	Tissue weight mg	MADKV21
265	L1	0.9375	0.9375	N2	FAM	STANDARD	FAM	NFQ-MGB	No Amp	Undetermined		0				FALSE	33456.8	TRUE	3	39					41.0371	0.995222	-3.6624	87.5186	0.672724	0.0488379	FALSE
266	L2	0.9375	0.9375	N2	FAM	STANDARD	FAM	NFQ-MGB	No Amp	Undetermined		0				FALSE	33456.8	TRUE	3	39					41.0371	0.995222	-3.6624	87.5186	0.672724	0.0488379	FALSE
267	L3	0.9375	0.9375	N2	FAM	STANDARD	FAM	NFQ-MGB	No Amp	Undetermined		0				FALSE	33456.8	TRUE	3	39					41.0371	0.995222	-3.6624	87.5186	0.672724	0.0488379	FALSE
241	K1	1.875	1.875	N2	FAM	STANDARD	FAM	NFQ-MGB	No Amp	Undetermined		0				FALSE	33456.8	TRUE	3	39					41.0371	0.995222	-3.6624	87.5186	0.672724	0.0488379	FALSE
242	K2	1.875	1.875	N2	FAM	STANDARD	FAM	NFQ-MGB	No Amp	Undetermined		0				FALSE	33456.8	TRUE	3	39					41.0371	0.995222	-3.6624	87.5186	0.672724	0.0488379	FALSE
243	K3	1.875	1.875	N2	FAM	STANDARD	FAM	NFQ-MGB	No Amp	Undetermined		0				FALSE	33456.8	TRUE	3	39					41.0371	0.995222	-3.6624	87.5186	0.672724	0.0488379	FALSE
217	J1	3.75	3.75	N2	FAM	STANDARD	FAM	NFQ-MGB	Inconclusive	38.5242	38.0545	0.560622	0.664234			FALSE	33456.8	TRUE	3	29					41.0371	0.995222	-3.6624	87.5186	0.672724	0.0488379	FALSE
218	J2	3.75	3.75	N2	FAM	STANDARD	FAM	NFQ-MGB	Amp	37.5848	38.0545	0.958121	0.664234			FALSE	33456.8	TRUE	3	31					41.0371	0.995222	-3.6624	87.5186	0.672724	0.0488379	FALSE
219	J3	3.75	3.75	N2	FAM	STANDARD	FAM	NFQ-MGB	No Amp	Undetermined	38.0545	0	0.664234			FALSE	33456.8	TRUE	3	39					41.0371	0.995222	-3.6624	87.5186	0.672724	0.0488379	FALSE
193	I1	7.5	7.5	N2	FAM	STANDARD	FAM	NFQ-MGB	Amp	36.7559	37.7166	0.960368	0.840806			FALSE	33456.8	TRUE	3	29					41.0371	0.995222	-3.6624	87.5186	0.672724	0.0488379	FALSE
194	I2	7.5	7.5	N2	FAM	STANDARD	FAM	NFQ-MGB	Inconclusive	38.0759	37.7166	0.92816	0.840806			FALSE	33456.8	TRUE	3	28					41.0371	0.995222	-3.6624	87.5186	0.672724	0.0488379	FALSE
195	I3	7.5	7.5	N2	FAM	STANDARD	FAM	NFQ-MGB	Inconclusive	38.3181	37.7166	0.814051	0.840806			FALSE	33456.8	TRUE	3	26					41.0371	0.995222	-3.6624	87.5186	0.672724	0.0488379	FALSE
169	H1	15.0	15	N2	FAM	STANDARD	FAM	NFQ-MGB	Amp	35.4689	37.2189	0.963115	1.62796			FALSE	33456.8	TRUE	3	26					41.0371	0.995222	-3.6624	87.5186	0.672724	0.0488379	FALSE
170	H2	15.0	15	N2	FAM	STANDARD	FAM	NFQ-MGB	Amp	37.4993	37.2189	0.949352	1.62796			FALSE	33456.8	TRUE	3	26					41.0371	0.995222	-3.6624	87.5186	0.672724	0.0488379	FALSE
171	H3	15.0	15	N2	FAM	STANDARD	FAM	NFQ-MGB	Inconclusive	38.6884	37.2189	0.372271	1.62796			FALSE	33456.8	TRUE	3	33					41.0371	0.995222	-3.6624	87.5186	0.672724	0.0488379	FALSE
145	G1	150.0	150	N2	FAM	STANDARD	FAM	NFQ-MGB	Amp	33.2429	33.179	0.967753	0.0972305			FALSE	33456.8	TRUE	3	25					41.0371	0.995222	-3.6624	87.5186	0.672724	0.0488379	FALSE
146	G2	150.0	150	N2	FAM	STANDARD	FAM	NFQ-MGB	Amp	33.0671	33.179	0.964338	0.0972305			FALSE	33456.8	TRUE	3	25					41.0371	0.995222	-3.6624	87.5186	0.672724	0.0488379	FALSE
147	G3	150.0	150	N2	FAM	STANDARD	FAM	NFQ-MGB	Amp	33.2269	33.179	0.959942	0.0972305			FALSE	33456.8	TRUE	3	27					41.0371	0.995222	-3.6624	87.5186	0.672724	0.0488379	FALSE
121	F1	1500.0	1500	N2	FAM	STANDARD	FAM	NFQ-MGB	Amp	29.4054	29.4565	0.984723	0.0664052			FALSE	33456.8	TRUE	3	19					41.0371	0.995222	-3.6624	87.5186	0.672724	0.0488379	FALSE
122	F2	1500.0	1500	N2	FAM	STANDARD	FAM	NFQ-MGB	Amp	29.5316	29.4565	0.984366	0.0664052			FALSE	33456.8	TRUE	3	22					41.0371	0.995222	-3.6624	87.5186	0.672724	0.0488379	FALSE
123	F3	1500.0	1500	N2	FAM	STANDARD	FAM	NFQ-MGB	Amp	29.4326	29.4565	0.981023	0.0664052			FALSE	33456.8	TRUE	3	20					41.0371	0.995222	-3.6624	87.5186	0.672724	0.0488379	FALSE
97	E1	15000.0	15000	N2	FAM	STANDARD	FAM	NFQ-MGB	Amp	25.8364	25.7968	0.973882	0.0669494			FALSE	33456.8	TRUE	3	20					41.0371	0.995222	-3.6624	87.5186	0.672724	0.0488379	FALSE
98	E2	15000.0	15000	N2	FAM	STANDARD	FAM	NFQ-MGB	Amp	25.8344	25.7968	0.979304	0.0669494			FALSE	33456.8	TRUE	3	18					41.0371	0.995222	-3.6624	87.5186	0.672724	0.0488379	FALSE
99	E3	15000.0	15000	N2	FAM	STANDARD	FAM	NFQ-MGB	Amp	25.7195	25.7968	0.98222	0.0669494			FALSE	33456.8	TRUE	3	18					41.0371	0.995222	-3.6624	87.5186	0.672724	0.0488379	FALSE
73	D1	150000.0	150000	N2	FAM	STANDARD	FAM	NFQ-MGB	Amp	22.2035	22.1751	0.987187	0.0406765			FALSE	33456.8	TRUE	3	16					41.0371	0.995222	-3.6624	87.5186	0.672724	0.0488379	FALSE
74	D2	150000.0	150000	N2	FAM	STANDARD	FAM	NFQ-MGB	Amp	22.1285	22.1751	0.981506	0.0406765			FALSE	33456.8	TRUE	3	14					41.0371	0.995222	-3.6624	87.5186	0.672724	0.0488379	FALSE
75	D3	150000.0	150000	N2	FAM	STANDARD	FAM	NFQ-MGB	Amp	22.1934	22.1751	0.980141	0.0406765			FALSE	33456.8	TRUE	3	13					41.0371	0.995222	-3.6624	87.5186	0.672724	0.0488379	FALSE
49	C1	1500000.0	1500000	N2	FAM	STANDARD	FAM	NFQ-MGB	Amp	18.3164	18.5461	0.981191	0.538505			FALSE	33456.8	TRUE	3	12					41.0371	0.995222	-3.6624	87.5186	0.672724	0.0488379	FALSE
50	C2	1500000.0	1500000	N2	FAM	STANDARD	FAM	NFQ-MGB	Amp	18.1606	18.5461	0.981615	0.538505			FALSE	33456.8	TRUE	3	9					41.0371	0.995222	-3.6624	87.5186	0.672724	0.0488379	FALSE
51	C3	1500000.0	1500000	N2	FAM	STANDARD	FAM	NFQ-MGB	Amp	19.1614	18.5461	0.984859	0.538505			FALSE	33456.8	TRUE	3	11					41.0371	0.995222	-3.6624	87.5186	0.672724	0.0488379	FALSE
25	B1	1.5E7	15000000	N2	FAM	STANDARD	FAM	NFQ-MGB	Amp	14.233	14.9499	0.884054	0.819769			FALSE	33456.8	TRUE	3	7					41.0371	0.995222	-3.6624	87.5186	0.672724	0.0488379	FALSE
26	B2	1.5E7	15000000	N2	FAM	STANDARD	FAM	NFQ-MGB	Amp	14.7731	14.9499	0.929373	0.819769			FALSE	33456.8	TRUE	3	9					41.0371	0.995222	-3.6624	87.5186	0.672724	0.0488379	FALSE
27	B3	1.5E7	15000000	N2	FAM	STANDARD	FAM	NFQ-MGB	Amp	15.8437	14.9499	0.912521	0.819769			FALSE	33456.8	TRUE	3	10					41.0371	0.995222	-3.6624	87.5186	0.672724	0.0488379	FALSE
1	A1	1.5E8	150000000	N2	FAM	STANDARD	FAM	NFQ-MGB	Amp	10.7524	10.6707	0.842739	0.0798386			FALSE	33456.8	TRUE	3	5					41.0371	0.995222	-3.6624	87.5186	0.672724	0.0488379	FALSE
2	A2	1.5E8	150000000	N2	FAM	STANDARD	FAM	NFQ-MGB	Amp	10.6667	10.6707	0.818905	0.0798386			FALSE	33456.8	TRUE	3	5					41.0371	0.995222	-3.6624	87.5186	0.672724	0.0488379	FALSE
3	A3	1.5E8	150000000	N2	FAM	STANDARD	FAM	NFQ-MGB	Amp	10.5929	10.6707	0.83594	0.0798386			FALSE	33456.8	TRUE	3	5					41.0371	0.995222	-3.6624	87.5186	0.672724	0.0488379	FALSE
7	A7	Sample 1		N2	FAM	UNKNOWN	FAM	NFQ-MGB	No Amp	Undetermined		0				FALSE	33456.8	TRUE	3	32					41.0371	0.995222	-3.6624	87.5186	0.672724	0.0488379	FALSE		Duo	Female	1.M	1.38017	100	150	1200	3	100	14	MADKV21	Lung was originally Ran 1/03/22 Results below
8	A8	Sample 1		N2	FAM	UNKNOWN	FAM	NFQ-MGB	No Amp	Undetermined		0				FALSE	33456.8	TRUE	3	39					41.0371	0.995222	-3.6624	87.5186	0.672724	0.0488379	FALSE
9	A9	Sample 1		N2	FAM	UNKNOWN	FAM	NFQ-MGB	No Amp	Undetermined		0				FALSE	33456.8	TRUE	3	39					41.0371	0.995222	-3.6624	87.5186	0.672724	0.0488379	FALSE
31	B7	Sample 2		N2	FAM	UNKNOWN	FAM	NFQ-MGB	No Amp	Undetermined		0				FALSE	33456.8	TRUE	3	39					41.0371	0.995222	-3.6624	87.5186	0.672724	0.0488379	FALSE		Kid	Female	1.M	0.525527	100	150	1200	3	100	70	MADKV21
32	B8	Sample 2		N2	FAM	UNKNOWN	FAM	NFQ-MGB	No Amp	Undetermined		0				FALSE	33456.8	TRUE	3	39					41.0371	0.995222	-3.6624	87.5186	0.672724	0.0488379	FALSE
33	B9	Sample 2		N2	FAM	UNKNOWN	FAM	NFQ-MGB	No Amp	Undetermined		0				FALSE	33456.8	TRUE	3	39					41.0371	0.995222	-3.6624	87.5186	0.672724	0.0488379	FALSE
55	C7	Sample 3		N2	FAM	UNKNOWN	FAM	NFQ-MGB	No Amp	Undetermined		0				FALSE	33456.8	TRUE	3	39					41.0371	0.995222	-3.6624	87.5186	0.672724	0.0488379	FALSE		Stom	Female	1.M	0.5	100	150	1200	3	100	40	MADKV21
56	C8	Sample 3		N2	FAM	UNKNOWN	FAM	NFQ-MGB	No Amp	Undetermined		0				FALSE	33456.8	TRUE	3	39					41.0371	0.995222	-3.6624	87.5186	0.672724	0.0488379	FALSE
57	C9	Sample 3		N2	FAM	UNKNOWN	FAM	NFQ-MGB	No Amp	Undetermined		0				FALSE	33456.8	TRUE	3	39					41.0371	0.995222	-3.6624	87.5186	0.672724	0.0488379	FALSE
79	D7	Sample 4		N2	FAM	UNKNOWN	FAM	NFQ-MGB	No Amp	Undetermined		0				FALSE	33456.8	TRUE	3	39					41.0371	0.995222	-3.6624	87.5186	0.672724	0.0488379	FALSE		Hrt	Female	1.M	2.25665	100	150	1200	3	100	22	MADKV21
80	D8	Sample 4		N2	FAM	UNKNOWN	FAM	NFQ-MGB	No Amp	Undetermined		0				FALSE	33456.8	TRUE	3	39					41.0371	0.995222	-3.6624	87.5186	0.672724	0.0488379	FALSE
81	D9	Sample 4		N2	FAM	UNKNOWN	FAM	NFQ-MGB	No Amp	Undetermined		0				FALSE	33456.8	TRUE	3	39					41.0371	0.995222	-3.6624	87.5186	0.672724	0.0488379	FALSE
103	E7	Sample 5		N2	FAM	UNKNOWN	FAM	NFQ-MGB	No Amp	Undetermined		0				FALSE	33456.8	TRUE	3	39					41.0371	0.995222	-3.6624	87.5186	0.672724	0.0488379	FALSE		Livr	Female	1.M	0.5	100	150	1200	3	100	31	MADKV21
104	E8	Sample 5		N2	FAM	UNKNOWN	FAM	NFQ-MGB	No Amp	Undetermined		0				FALSE	33456.8	TRUE	3	39					41.0371	0.995222	-3.6624	87.5186	0.672724	0.0488379	FALSE
105	E9	Sample 5		N2	FAM	UNKNOWN	FAM	NFQ-MGB	No Amp	Undetermined		0				FALSE	33456.8	TRUE	3	39					41.0371	0.995222	-3.6624	87.5186	0.672724	0.0488379	FALSE
127	F7	Sample 6		N2	FAM	UNKNOWN	FAM	NFQ-MGB	No Amp	Undetermined		0				FALSE	33456.8	TRUE	3	39					41.0371	0.995222	-3.6624	87.5186	0.672724	0.0488379	FALSE		Spln	Female	1.M	3.4118	100	150	1200	3	100	13	MADKV21
128	F8	Sample 6		N2	FAM	UNKNOWN	FAM	NFQ-MGB	No Amp	Undetermined		0				FALSE	33456.8	TRUE	3	39					41.0371	0.995222	-3.6624	87.5186	0.672724	0.0488379	FALSE
129	F9	Sample 6		N2	FAM	UNKNOWN	FAM	NFQ-MGB	No Amp	Undetermined		0				FALSE	33456.8	TRUE	3	39					41.0371	0.995222	-3.6624	87.5186	0.672724	0.0488379	FALSE
151	G7	Sample 7		N2	FAM	UNKNOWN	FAM	NFQ-MGB	No Amp	Undetermined	38.6334	0				FALSE	33456.8	TRUE	3	39					41.0371	0.995222	-3.6624	87.5186	0.672724	0.0488379	FALSE		Lung	Female	1.M	1.249	100	150	1200	3	100	26	MADKV21
152	G8	Sample 7		N2	FAM	UNKNOWN	FAM	NFQ-MGB	No Amp	Undetermined	38.6334	0				FALSE	33456.8	TRUE	3	39					41.0371	0.995222	-3.6624	87.5186	0.672724	0.0488379	FALSE
153	G9	Sample 7	4.53217	N2	FAM	UNKNOWN	FAM	NFQ-MGB	Inconclusive	38.6334	38.6334	0.4293				FALSE	33456.8	TRUE	3	30					41.0371	0.995222	-3.6624	87.5186	0.672724	0.0488379	FALSE
199	I7	Sample 9		N2	FAM	UNKNOWN	FAM	NFQ-MGB	No Amp	Undetermined		0				FALSE	33456.8	TRUE	3	39					41.0371	0.995222	-3.6624	87.5186	0.672724	0.0488379	FALSE		Duo	Female	2.M	2.07775	100	150	1200	3	100	11	MADKV21
200	I8	Sample 9		N2	FAM	UNKNOWN	FAM	NFQ-MGB	No Amp	Undetermined		0				FALSE	33456.8	TRUE	3	39					41.0371	0.995222	-3.6624	87.5186	0.672724	0.0488379	FALSE
201	I9	Sample 9		N2	FAM	UNKNOWN	FAM	NFQ-MGB	No Amp	Undetermined		0				FALSE	33456.8	TRUE	3	39					41.0371	0.995222	-3.6624	87.5186	0.672724	0.0488379	FALSE
223	J7	Sample 10		N2	FAM	UNKNOWN	FAM	NFQ-MGB	No Amp	Undetermined		0				FALSE	33456.8	TRUE	3	39					41.0371	0.995222	-3.6624	87.5186	0.672724	0.0488379	FALSE		Kid	Female	2.M	0.607995	100	150	1200	3	100	48	MADKV21
224	J8	Sample 10		N2	FAM	UNKNOWN	FAM	NFQ-MGB	No Amp	Undetermined		0				FALSE	33456.8	TRUE	3	39					41.0371	0.995222	-3.6624	87.5186	0.672724	0.0488379	FALSE
225	J9	Sample 10		N2	FAM	UNKNOWN	FAM	NFQ-MGB	No Amp	Undetermined		0				FALSE	33456.8	TRUE	3	39					41.0371	0.995222	-3.6624	87.5186	0.672724	0.0488379	FALSE
247	K7	Sample 11		N2	FAM	UNKNOWN	FAM	NFQ-MGB	No Amp	Undetermined		0				FALSE	33456.8	TRUE	3	39					41.0371	0.995222	-3.6624	87.5186	0.672724	0.0488379	FALSE		Stom	Female	2.M	0.5	100	150	1200	3	100	43	MADKV21
248	K8	Sample 11		N2	FAM	UNKNOWN	FAM	NFQ-MGB	No Amp	Undetermined		0				FALSE	33456.8	TRUE	3	39					41.0371	0.995222	-3.6624	87.5186	0.672724	0.0488379	FALSE
249	K9	Sample 11		N2	FAM	UNKNOWN	FAM	NFQ-MGB	No Amp	Undetermined		0				FALSE	33456.8	TRUE	3	39					41.0371	0.995222	-3.6624	87.5186	0.672724	0.0488379	FALSE
271	L7	Sample 12		N2	FAM	UNKNOWN	FAM	NFQ-MGB	No Amp	Undetermined		0				FALSE	33456.8	TRUE	3	39					41.0371	0.995222	-3.6624	87.5186	0.672724	0.0488379	FALSE		Hrt	Female	2.M	3.93074	100	150	1200	3	100	17	MADKV21
272	L8	Sample 12		N2	FAM	UNKNOWN	FAM	NFQ-MGB	No Amp	Undetermined		0				FALSE	33456.8	TRUE	3	39					41.0371	0.995222	-3.6624	87.5186	0.672724	0.0488379	FALSE
273	L9	Sample 12		N2	FAM	UNKNOWN	FAM	NFQ-MGB	No Amp	Undetermined		0				FALSE	33456.8	TRUE	3	39					41.0371	0.995222	-3.6624	87.5186	0.672724	0.0488379	FALSE
295	M7	Sample 13		N2	FAM	UNKNOWN	FAM	NFQ-MGB	No Amp	Undetermined		0				FALSE	33456.8	TRUE	3	39					41.0371	0.995222	-3.6624	87.5186	0.672724	0.0488379	FALSE		Livr	Female	2.M	0.5	100	150	1200	3	100	44	MADKV21
296	M8	Sample 13		N2	FAM	UNKNOWN	FAM	NFQ-MGB	No Amp	Undetermined		0				FALSE	33456.8	TRUE	3	39					41.0371	0.995222	-3.6624	87.5186	0.672724	0.0488379	FALSE
297	M9	Sample 13		N2	FAM	UNKNOWN	FAM	NFQ-MGB	No Amp	Undetermined		0				FALSE	33456.8	TRUE	3	39					41.0371	0.995222	-3.6624	87.5186	0.672724	0.0488379	FALSE
319	N7	Sample 14		N2	FAM	UNKNOWN	FAM	NFQ-MGB	No Amp	Undetermined		0				FALSE	33456.8	TRUE	3	39					41.0371	0.995222	-3.6624	87.5186	0.672724	0.0488379	FALSE		Spln	Female	2.M	1.58887	100	150	1200	3	100	18	MADKV21
320	N8	Sample 14		N2	FAM	UNKNOWN	FAM	NFQ-MGB	No Amp	Undetermined		0				FALSE	33456.8	TRUE	3	39					41.0371	0.995222	-3.6624	87.5186	0.672724	0.0488379	FALSE
321	N9	Sample 14		N2	FAM	UNKNOWN	FAM	NFQ-MGB	No Amp	Undetermined		0				FALSE	33456.8	TRUE	3	39					41.0371	0.995222	-3.6624	87.5186	0.672724	0.0488379	FALSE
343	O7	Sample 15		N2	FAM	UNKNOWN	FAM	NFQ-MGB	No Amp	Undetermined		0				FALSE	33456.8	TRUE	3	39					41.0371	0.995222	-3.6624	87.5186	0.672724	0.0488379	FALSE		Lung	Female	2.M	1.13128	100	150	1200	3	100	19	MADKV21
344	O8	Sample 15		N2	FAM	UNKNOWN	FAM	NFQ-MGB	No Amp	Undetermined		0				FALSE	33456.8	TRUE	3	39					41.0371	0.995222	-3.6624	87.5186	0.672724	0.0488379	FALSE
345	O9	Sample 15		N2	FAM	UNKNOWN	FAM	NFQ-MGB	No Amp	Undetermined		0				FALSE	33456.8	TRUE	3	39					41.0371	0.995222	-3.6624	87.5186	0.672724	0.0488379	FALSE
10	A10	Sample 17		N2	FAM	UNKNOWN	FAM	NFQ-MGB	No Amp	Undetermined		0				FALSE	33456.8	TRUE	3	39					41.0371	0.995222	-3.6624	87.5186	0.672724	0.0488379	FALSE		Duo	Female	3.M	1.66284	100	150	1200	3	100	7	MADKV21
11	A11	Sample 17		N2	FAM	UNKNOWN	FAM	NFQ-MGB	No Amp	Undetermined		0				FALSE	33456.8	TRUE	3	39					41.0371	0.995222	-3.6624	87.5186	0.672724	0.0488379	FALSE
12	A12	Sample 17		N2	FAM	UNKNOWN	FAM	NFQ-MGB	No Amp	Undetermined		0				FALSE	33456.8	TRUE	3	39					41.0371	0.995222	-3.6624	87.5186	0.672724	0.0488379	FALSE
34	B10	Sample 18		N2	FAM	UNKNOWN	FAM	NFQ-MGB	No Amp	Undetermined		0				FALSE	33456.8	TRUE	3	39					41.0371	0.995222	-3.6624	87.5186	0.672724	0.0488379	FALSE		Kid	Female	3.M	0.784815	100	150	1200	3	100	53	MADKV21
35	B11	Sample 18		N2	FAM	UNKNOWN	FAM	NFQ-MGB	No Amp	Undetermined		0				FALSE	33456.8	TRUE	3	39					41.0371	0.995222	-3.6624	87.5186	0.672724	0.0488379	FALSE
36	B12	Sample 18		N2	FAM	UNKNOWN	FAM	NFQ-MGB	No Amp	Undetermined		0				FALSE	33456.8	TRUE	3	39					41.0371	0.995222	-3.6624	87.5186	0.672724	0.0488379	FALSE
58	C10	Sample 19		N2	FAM	UNKNOWN	FAM	NFQ-MGB	No Amp	Undetermined		0				FALSE	33456.8	TRUE	3	39					41.0371	0.995222	-3.6624	87.5186	0.672724	0.0488379	FALSE		Stom	Female	3.M	0.5	100	150	1200	3	100	63	MADKV21
59	C11	Sample 19		N2	FAM	UNKNOWN	FAM	NFQ-MGB	No Amp	Undetermined		0				FALSE	33456.8	TRUE	3	39					41.0371	0.995222	-3.6624	87.5186	0.672724	0.0488379	FALSE
60	C12	Sample 19		N2	FAM	UNKNOWN	FAM	NFQ-MGB	No Amp	Undetermined		0				FALSE	33456.8	TRUE	3	39					41.0371	0.995222	-3.6624	87.5186	0.672724	0.0488379	FALSE
82	D10	Sample 20	16.0357	N2	FAM	UNKNOWN	FAM	NFQ-MGB	Amp	36.6236	36.6236	0.949171				FALSE	33456.8	TRUE	3	29					41.0371	0.995222	-3.6624	87.5186	0.672724	0.0488379	FALSE		Hrt	Female	3.M	5.15969	100	150	1200	3	100	17	MADKV21
83	D11	Sample 20		N2	FAM	UNKNOWN	FAM	NFQ-MGB	No Amp	Undetermined	36.6236	0				FALSE	33456.8	TRUE	3	39					41.0371	0.995222	-3.6624	87.5186	0.672724	0.0488379	FALSE
84	D12	Sample 20		N2	FAM	UNKNOWN	FAM	NFQ-MGB	No Amp	Undetermined	36.6236	0				FALSE	33456.8	TRUE	3	39					41.0371	0.995222	-3.6624	87.5186	0.672724	0.0488379	FALSE
106	E10	Sample 21		N2	FAM	UNKNOWN	FAM	NFQ-MGB	No Amp	Undetermined		0				FALSE	33456.8	TRUE	3	39					41.0371	0.995222	-3.6624	87.5186	0.672724	0.0488379	FALSE		Livr	Female	3.M	0.5	100	150	1200	3	100	46	MADKV21
107	E11	Sample 21		N2	FAM	UNKNOWN	FAM	NFQ-MGB	No Amp	Undetermined		0				FALSE	33456.8	TRUE	3	39					41.0371	0.995222	-3.6624	87.5186	0.672724	0.0488379	FALSE
108	E12	Sample 21		N2	FAM	UNKNOWN	FAM	NFQ-MGB	No Amp	Undetermined		0				FALSE	33456.8	TRUE	3	39					41.0371	0.995222	-3.6624	87.5186	0.672724	0.0488379	FALSE
130	F10	Sample 22		N2	FAM	UNKNOWN	FAM	NFQ-MGB	No Amp	Undetermined		0				FALSE	33456.8	TRUE	3	39					41.0371	0.995222	-3.6624	87.5186	0.672724	0.0488379	FALSE		Spln	Female	3.M	1.69341	100	150	1200	3	100	14	MADKV21
131	F11	Sample 22		N2	FAM	UNKNOWN	FAM	NFQ-MGB	No Amp	Undetermined		0				FALSE	33456.8	TRUE	3	39					41.0371	0.995222	-3.6624	87.5186	0.672724	0.0488379	FALSE
132	F12	Sample 22		N2	FAM	UNKNOWN	FAM	NFQ-MGB	No Amp	Undetermined		0				FALSE	33456.8	TRUE	3	39					41.0371	0.995222	-3.6624	87.5186	0.672724	0.0488379	FALSE
154	G10	Sample 23		N2	FAM	UNKNOWN	FAM	NFQ-MGB	No Amp	Undetermined	37.5565	0				FALSE	33456.8	TRUE	3	39					41.0371	0.995222	-3.6624	87.5186	0.672724	0.0488379	FALSE		Lung	Female	3.M	1.14664	100	150	1200	3	100	27	MADKV21
155	G11	Sample 23		N2	FAM	UNKNOWN	FAM	NFQ-MGB	No Amp	Undetermined	37.5565	0				FALSE	33456.8	TRUE	3	39					41.0371	0.995222	-3.6624	87.5186	0.672724	0.0488379	FALSE
156	G12	Sample 23	8.91973	N2	FAM	UNKNOWN	FAM	NFQ-MGB	Inconclusive	37.5565	37.5565	0.91866				FALSE	33456.8	TRUE	3	30					41.0371	0.995222	-3.6624	87.5186	0.672724	0.0488379	FALSE
202	I10	Sample 25	7.51059	N2	FAM	UNKNOWN	FAM	NFQ-MGB	Inconclusive	37.83	37.1098	0.94721	1.01859			FALSE	33456.8	TRUE	3	26					41.0371	0.995222	-3.6624	87.5186	0.672724	0.0488379	FALSE		Duo	Female	1.2	0.5	100	150	1200	3	100	22	MADKV21
203	I11	Sample 25	18.5778	N2	FAM	UNKNOWN	FAM	NFQ-MGB	Amp	36.3895	37.1098	0.953268	1.01859			FALSE	33456.8	TRUE	3	27					41.0371	0.995222	-3.6624	87.5186	0.672724	0.0488379	FALSE
204	I12	Sample 25		N2	FAM	UNKNOWN	FAM	NFQ-MGB	No Amp	Undetermined	37.1098	0	1.01859			FALSE	33456.8	TRUE	3	39					41.0371	0.995222	-3.6624	87.5186	0.672724	0.0488379	FALSE
226	J10	Sample 26	32.4438	N2	FAM	UNKNOWN	FAM	NFQ-MGB	Amp	35.5027	35.3199	0.953338	0.168178	36.5312	3.79635	FALSE	33456.8	TRUE	3	27					41.0371	0.995222	-3.6624	87.5186	0.672724	0.0488379	FALSE		Kid	Female	1.2	0.644743	100	150	1200	3	100	50	MADKV21
227	J11	Sample 26	37.2029	N2	FAM	UNKNOWN	FAM	NFQ-MGB	Amp	35.285	35.3199	0.963462	0.168178	36.5312	3.79635	FALSE	33456.8	TRUE	3	25					41.0371	0.995222	-3.6624	87.5186	0.672724	0.0488379	FALSE
228	J12	Sample 26	39.9469	N2	FAM	UNKNOWN	FAM	NFQ-MGB	Amp	35.1718	35.3199	0.976272	0.168178	36.5312	3.79635	FALSE	33456.8	TRUE	3	25					41.0371	0.995222	-3.6624	87.5186	0.672724	0.0488379	FALSE
250	K10	Sample 27	269.003	N2	FAM	UNKNOWN	FAM	NFQ-MGB	Amp	32.1384	32.0602	0.977456	0.272103	285.375	50.2441	FALSE	33456.8	TRUE	3	22					41.0371	0.995222	-3.6624	87.5186	0.672724	0.0488379	FALSE		Stom	Female	1.2	1.19027	100	150	1200	3	100	11	MADKV21
251	K11	Sample 27	341.763	N2	FAM	UNKNOWN	FAM	NFQ-MGB	Amp	31.7576	32.0602	0.976121	0.272103	285.375	50.2441	FALSE	33456.8	TRUE	3	21					41.0371	0.995222	-3.6624	87.5186	0.672724	0.0488379	FALSE
252	K12	Sample 27	245.359	N2	FAM	UNKNOWN	FAM	NFQ-MGB	Amp	32.2847	32.0602	0.973474	0.272103	285.375	50.2441	FALSE	33456.8	TRUE	3	25					41.0371	0.995222	-3.6624	87.5186	0.672724	0.0488379	FALSE
274	L10	Sample 28	818.754	N2	FAM	UNKNOWN	FAM	NFQ-MGB	Amp	30.368	30.3584	0.966203	0.0664699	824.164	34.5859	FALSE	33456.8	TRUE	3	23					41.0371	0.995222	-3.6624	87.5186	0.672724	0.0488379	FALSE		Hrt	Female	1.2	1.86614	100	150	1200	3	100	29	MADKV21
275	L11	Sample 28	792.603	N2	FAM	UNKNOWN	FAM	NFQ-MGB	Amp	30.4196	30.3584	0.977886	0.0664699	824.164	34.5859	FALSE	33456.8	TRUE	3	24					41.0371	0.995222	-3.6624	87.5186	0.672724	0.0488379	FALSE
276	L12	Sample 28	861.137	N2	FAM	UNKNOWN	FAM	NFQ-MGB	Amp	30.2877	30.3584	0.982369	0.0664699	824.164	34.5859	FALSE	33456.8	TRUE	3	22					41.0371	0.995222	-3.6624	87.5186	0.672724	0.0488379	FALSE
298	M10	Sample 29	146.653	N2	FAM	UNKNOWN	FAM	NFQ-MGB	Amp	33.1033	32.9954	0.966118	0.135076	157.331	13.592	FALSE	33456.8	TRUE	3	25					41.0371	0.995222	-3.6624	87.5186	0.672724	0.0488379	FALSE		Livr	Female	1.2	0.5	100	150	1200	3	100	37	MADKV21
299	M11	Sample 29	172.631	N2	FAM	UNKNOWN	FAM	NFQ-MGB	Amp	32.8439	32.9954	0.984531	0.135076	157.331	13.592	FALSE	33456.8	TRUE	3	25					41.0371	0.995222	-3.6624	87.5186	0.672724	0.0488379	FALSE
300	M12	Sample 29	152.709	N2	FAM	UNKNOWN	FAM	NFQ-MGB	Amp	33.0389	32.9954	0.970135	0.135076	157.331	13.592	FALSE	33456.8	TRUE	3	24					41.0371	0.995222	-3.6624	87.5186	0.672724	0.0488379	FALSE
322	N10	Sample 30	57.2693	N2	FAM	UNKNOWN	FAM	NFQ-MGB	Amp	34.5989	34.8492	0.967234	0.672158	51.6861	19.1968	FALSE	33456.8	TRUE	3	24					41.0371	0.995222	-3.6624	87.5186	0.672724	0.0488379	FALSE		Spln	Female	1.2	1.46121	100	150	1200	3	100	9	MADKV21
323	N11	Sample 30	30.3166	N2	FAM	UNKNOWN	FAM	NFQ-MGB	Amp	35.6106	34.8492	0.97011	0.672158	51.6861	19.1968	FALSE	33456.8	TRUE	3	28					41.0371	0.995222	-3.6624	87.5186	0.672724	0.0488379	FALSE
324	N12	Sample 30	67.4723	N2	FAM	UNKNOWN	FAM	NFQ-MGB	Amp	34.3381	34.8492	0.974991	0.672158	51.6861	19.1968	FALSE	33456.8	TRUE	3	26					41.0371	0.995222	-3.6624	87.5186	0.672724	0.0488379	FALSE
346	O10	Sample 31	9.68264e+06	N2	FAM	UNKNOWN	FAM	NFQ-MGB	Amp	15.4516	15.6624	0.968849	0.187175	8.52049e+06	1.02722e+06	FALSE	33456.8	TRUE	3	7					41.0371	0.995222	-3.6624	87.5186	0.672724	0.0488379	FALSE		Lung	Female	1.2	1.10312	100	150	1200	3	100	23	MADKV21
347	O11	Sample 31	7.73387e+06	N2	FAM	UNKNOWN	FAM	NFQ-MGB	Amp	15.809	15.6624	0.983558	0.187175	8.52049e+06	1.02722e+06	FALSE	33456.8	TRUE	3	9					41.0371	0.995222	-3.6624	87.5186	0.672724	0.0488379	FALSE
348	O12	Sample 31	8.14498e+06	N2	FAM	UNKNOWN	FAM	NFQ-MGB	Amp	15.7267	15.6624	0.977081	0.187175	8.52049e+06	1.02722e+06	FALSE	33456.8	TRUE	3	7					41.0371	0.995222	-3.6624	87.5186	0.672724	0.0488379	FALSE
13	A13	Sample 33		N2	FAM	UNKNOWN	FAM	NFQ-MGB	No Amp	Undetermined	32.1192	0	0.292507			FALSE	33456.8	TRUE	3	28					41.0371	0.995222	-3.6624	87.5186	0.672724	0.0488379	FALSE		Duo	Female	2.2	0.498278	100	150	1200	3	100	7	MADKV21
14	A14	Sample 33	239.059	N2	FAM	UNKNOWN	FAM	NFQ-MGB	Amp	32.3261	32.1192	0.921833	0.292507			FALSE	33456.8	TRUE	3	25					41.0371	0.995222	-3.6624	87.5186	0.672724	0.0488379	FALSE
15	A15	Sample 33	310.067	N2	FAM	UNKNOWN	FAM	NFQ-MGB	Amp	31.9124	32.1192	0.83819	0.292507			FALSE	33456.8	TRUE	3	26					41.0371	0.995222	-3.6624	87.5186	0.672724	0.0488379	FALSE
37	B13	Sample 34	17.2617	N2	FAM	UNKNOWN	FAM	NFQ-MGB	Amp	36.5064	35.9484	0.949506	0.810569	26.884	14.8487	FALSE	33456.8	TRUE	3	31					41.0371	0.995222	-3.6624	87.5186	0.672724	0.0488379	FALSE		Kid	Female	2.2	0.5	100	150	1200	3	100	68	MADKV21
38	B14	Sample 34	43.985	N2	FAM	UNKNOWN	FAM	NFQ-MGB	Amp	35.0187	35.9484	0.977435	0.810569	26.884	14.8487	FALSE	33456.8	TRUE	3	27					41.0371	0.995222	-3.6624	87.5186	0.672724	0.0488379	FALSE
39	B15	Sample 34	19.4052	N2	FAM	UNKNOWN	FAM	NFQ-MGB	Amp	36.3202	35.9484	0.947187	0.810569	26.884	14.8487	FALSE	33456.8	TRUE	3	28					41.0371	0.995222	-3.6624	87.5186	0.672724	0.0488379	FALSE
61	C13	Sample 35	13.5689	N2	FAM	UNKNOWN	FAM	NFQ-MGB	Amp	36.8893	35.3656	0.951806	1.46296	45.6283	36.2297	FALSE	33456.8	TRUE	3	26					41.0371	0.995222	-3.6624	87.5186	0.672724	0.0488379	FALSE		Stom	Female	2.2	1.41576	100	150	1200	3	100	48	MADKV21
62	C14	Sample 35	38.3827	N2	FAM	UNKNOWN	FAM	NFQ-MGB	Amp	35.2354	35.3656	0.961944	1.46296	45.6283	36.2297	FALSE	33456.8	TRUE	3	26					41.0371	0.995222	-3.6624	87.5186	0.672724	0.0488379	FALSE
63	C15	Sample 35	84.9333	N2	FAM	UNKNOWN	FAM	NFQ-MGB	Amp	33.972	35.3656	0.974882	1.46296	45.6283	36.2297	FALSE	33456.8	TRUE	3	26					41.0371	0.995222	-3.6624	87.5186	0.672724	0.0488379	FALSE
85	D13	Sample 36	207.375	N2	FAM	UNKNOWN	FAM	NFQ-MGB	Amp	32.5522	32.4787	0.975243	0.313892	220.069	44.5944	FALSE	33456.8	TRUE	3	22					41.0371	0.995222	-3.6624	87.5186	0.672724	0.0488379	FALSE		Hrt	Female	2.2	1.55637	100	150	1200	3	100	34	MADKV21
86	D14	Sample 36	183.198	N2	FAM	UNKNOWN	FAM	NFQ-MGB	Amp	32.7494	32.4787	0.979924	0.313892	220.069	44.5944	FALSE	33456.8	TRUE	3	23					41.0371	0.995222	-3.6624	87.5186	0.672724	0.0488379	FALSE
87	D15	Sample 36	269.634	N2	FAM	UNKNOWN	FAM	NFQ-MGB	Amp	32.1346	32.4787	0.975169	0.313892	220.069	44.5944	FALSE	33456.8	TRUE	3	25					41.0371	0.995222	-3.6624	87.5186	0.672724	0.0488379	FALSE
109	E13	Sample 37	86.1644	N2	FAM	UNKNOWN	FAM	NFQ-MGB	Amp	33.9492	34.0119	0.949609	0.147613	83.0652	7.51218	FALSE	33456.8	TRUE	3	28					41.0371	0.995222	-3.6624	87.5186	0.672724	0.0488379	FALSE		Livr	Female	2.2	0.5	100	150	1200	3	100	49	MADKV21
110	E14	Sample 37	88.5319	N2	FAM	UNKNOWN	FAM	NFQ-MGB	Amp	33.906	34.0119	0.970075	0.147613	83.0652	7.51218	FALSE	33456.8	TRUE	3	27					41.0371	0.995222	-3.6624	87.5186	0.672724	0.0488379	FALSE
111	E15	Sample 37	74.4993	N2	FAM	UNKNOWN	FAM	NFQ-MGB	Amp	34.1805	34.0119	0.96018	0.147613	83.0652	7.51218	FALSE	33456.8	TRUE	3	26					41.0371	0.995222	-3.6624	87.5186	0.672724	0.0488379	FALSE
133	F13	Sample 38	125.477	N2	FAM	UNKNOWN	FAM	NFQ-MGB	Amp	33.3513	33.2562	0.965713	0.103522	133.396	8.73804	FALSE	33456.8	TRUE	3	25					41.0371	0.995222	-3.6624	87.5186	0.672724	0.0488379	FALSE		Spln	Female	2.2	1.95215	100	150	1200	3	100	20	MADKV21
134	F14	Sample 38	142.771	N2	FAM	UNKNOWN	FAM	NFQ-MGB	Amp	33.146	33.2562	0.966183	0.103522	133.396	8.73804	FALSE	33456.8	TRUE	3	26					41.0371	0.995222	-3.6624	87.5186	0.672724	0.0488379	FALSE
135	F15	Sample 38	131.941	N2	FAM	UNKNOWN	FAM	NFQ-MGB	Amp	33.2714	33.2562	0.977703	0.103522	133.396	8.73804	FALSE	33456.8	TRUE	3	27					41.0371	0.995222	-3.6624	87.5186	0.672724	0.0488379	FALSE
157	G13	Sample 39	9.90685e+06	N2	FAM	UNKNOWN	FAM	NFQ-MGB	Amp	15.4152	15.5279	0.986869	0.121122	9.2467e+06	698628	FALSE	33456.8	TRUE	3	7					41.0371	0.995222	-3.6624	87.5186	0.672724	0.0488379	FALSE		Lung	Female	2.2	1.34138	100	150	1200	3	100	13	MADKV21
158	G14	Sample 39	8.51509e+06	N2	FAM	UNKNOWN	FAM	NFQ-MGB	Amp	15.656	15.5279	0.945713	0.121122	9.2467e+06	698628	FALSE	33456.8	TRUE	3	9					41.0371	0.995222	-3.6624	87.5186	0.672724	0.0488379	FALSE
159	G15	Sample 39	9.31815e+06	N2	FAM	UNKNOWN	FAM	NFQ-MGB	Amp	15.5126	15.5279	0.978622	0.121122	9.2467e+06	698628	FALSE	33456.8	TRUE	3	9					41.0371	0.995222	-3.6624	87.5186	0.672724	0.0488379	FALSE
205	I13	Sample 41		N2	FAM	UNKNOWN	FAM	NFQ-MGB	No Amp	Undetermined	38.8362	0				FALSE	33456.8	TRUE	3	39					41.0371	0.995222	-3.6624	87.5186	0.672724	0.0488379	FALSE		Duo	Female	3.2	0.224996	100	150	1200	3	100	24	MADKV21
206	I14	Sample 41		N2	FAM	UNKNOWN	FAM	NFQ-MGB	No Amp	Undetermined	38.8362	0				FALSE	33456.8	TRUE	3	39					41.0371	0.995222	-3.6624	87.5186	0.672724	0.0488379	FALSE
207	I15	Sample 41	3.98981	N2	FAM	UNKNOWN	FAM	NFQ-MGB	Inconclusive	38.8362	38.8362	0.219282				FALSE	33456.8	TRUE	3	32					41.0371	0.995222	-3.6624	87.5186	0.672724	0.0488379	FALSE
229	J13	Sample 42		N2	FAM	UNKNOWN	FAM	NFQ-MGB	No Amp	Undetermined	38.9902	0	0.270902			FALSE	33456.8	TRUE	3	39					41.0371	0.995222	-3.6624	87.5186	0.672724	0.0488379	FALSE		Kid	Female	3.2	1.22563	100	150	1200	3	100	23	MADKV21
230	J14	Sample 42	3.21067	N2	FAM	UNKNOWN	FAM	NFQ-MGB	Inconclusive	39.1817	38.9902	0	0.270902			FALSE	33456.8	TRUE	3	31					41.0371	0.995222	-3.6624	87.5186	0.672724	0.0488379	FALSE
231	J15	Sample 42	4.0851	N2	FAM	UNKNOWN	FAM	NFQ-MGB	Inconclusive	38.7986	38.9902	0.234484	0.270902			FALSE	33456.8	TRUE	3	30					41.0371	0.995222	-3.6624	87.5186	0.672724	0.0488379	FALSE
253	K13	Sample 43	56.3686	N2	FAM	UNKNOWN	FAM	NFQ-MGB	Amp	34.6241	34.8402	0.971039	0.61845	51.5686	17.9196	FALSE	33456.8	TRUE	3	29					41.0371	0.995222	-3.6624	87.5186	0.672724	0.0488379	FALSE		Stom	Female	3.2	0.5	100	150	1200	3	100	47	MADKV21
254	K14	Sample 43	31.7378	N2	FAM	UNKNOWN	FAM	NFQ-MGB	Amp	35.5377	34.8402	0.967621	0.61845	51.5686	17.9196	FALSE	33456.8	TRUE	3	27					41.0371	0.995222	-3.6624	87.5186	0.672724	0.0488379	FALSE
255	K15	Sample 43	66.5994	N2	FAM	UNKNOWN	FAM	NFQ-MGB	Amp	34.3588	34.8402	0.972147	0.61845	51.5686	17.9196	FALSE	33456.8	TRUE	3	28					41.0371	0.995222	-3.6624	87.5186	0.672724	0.0488379	FALSE
277	L13	Sample 44	9756.11	N2	FAM	UNKNOWN	FAM	NFQ-MGB	Amp	26.4268	26.3304	0.966961	0.0860251	10375.7	554.409	FALSE	33456.8	TRUE	3	19					41.0371	0.995222	-3.6624	87.5186	0.672724	0.0488379	FALSE		Hrt	Female	3.2	1.66423	100	150	1200	3	100	28	MADKV21
278	L14	Sample 44	10546.2	N2	FAM	UNKNOWN	FAM	NFQ-MGB	Amp	26.3029	26.3304	0.982304	0.0860251	10375.7	554.409	FALSE	33456.8	TRUE	3	17					41.0371	0.995222	-3.6624	87.5186	0.672724	0.0488379	FALSE
279	L15	Sample 44	10824.9	N2	FAM	UNKNOWN	FAM	NFQ-MGB	Amp	26.2614	26.3304	0.981434	0.0860251	10375.7	554.409	FALSE	33456.8	TRUE	3	17					41.0371	0.995222	-3.6624	87.5186	0.672724	0.0488379	FALSE
301	M13	Sample 45	5.59299	N2	FAM	UNKNOWN	FAM	NFQ-MGB	Inconclusive	38.2989	38.455	0.790359	0.391789	5.16909	1.18443	FALSE	33456.8	TRUE	3	26					41.0371	0.995222	-3.6624	87.5186	0.672724	0.0488379	FALSE		Livr	Female	3.2	0.5	100	150	1200	3	100	34	MADKV21
302	M14	Sample 45	6.08324	N2	FAM	UNKNOWN	FAM	NFQ-MGB	Inconclusive	38.1653	38.455	0.872839	0.391789	5.16909	1.18443	FALSE	33456.8	TRUE	3	26					41.0371	0.995222	-3.6624	87.5186	0.672724	0.0488379	FALSE
303	M15	Sample 45	3.83103	N2	FAM	UNKNOWN	FAM	NFQ-MGB	Inconclusive	38.9008	38.455	0.109007	0.391789	5.16909	1.18443	FALSE	33456.8	TRUE	3	30					41.0371	0.995222	-3.6624	87.5186	0.672724	0.0488379	FALSE
325	N13	Sample 46	7.49772	N2	FAM	UNKNOWN	FAM	NFQ-MGB	Inconclusive	37.8328	38.6204	0.931564	1.11385			FALSE	33456.8	TRUE	3	31					41.0371	0.995222	-3.6624	87.5186	0.672724	0.0488379	FALSE		Spln	Female	3.2	1.03835	100	150	1200	3	100	18	MADKV21
326	N14	Sample 46		N2	FAM	UNKNOWN	FAM	NFQ-MGB	No Amp	Undetermined	38.6204	0	1.11385			FALSE	33456.8	TRUE	3	39					41.0371	0.995222	-3.6624	87.5186	0.672724	0.0488379	FALSE
327	N15	Sample 46	2.78499	N2	FAM	UNKNOWN	FAM	NFQ-MGB	Inconclusive	39.408	38.6204	0	1.11385			FALSE	33456.8	TRUE	3	30					41.0371	0.995222	-3.6624	87.5186	0.672724	0.0488379	FALSE
349	O13	Sample 47	3.79804e+06	N2	FAM	UNKNOWN	FAM	NFQ-MGB	Amp	16.9401	16.9897	0.986512	0.0718253	3.68387e+06	164266	FALSE	33456.8	TRUE	3	8					41.0371	0.995222	-3.6624	87.5186	0.672724	0.0488379	FALSE		Lung	Female	3.2	0.635928	100	150	1200	3	100	35	MADKV21
350	O14	Sample 47	3.49561e+06	N2	FAM	UNKNOWN	FAM	NFQ-MGB	Amp	17.0721	16.9897	0.982073	0.0718253	3.68387e+06	164266	FALSE	33456.8	TRUE	3	9					41.0371	0.995222	-3.6624	87.5186	0.672724	0.0488379	FALSE
351	O15	Sample 47	3.75795e+06	N2	FAM	UNKNOWN	FAM	NFQ-MGB	Amp	16.957	16.9897	0.983064	0.0718253	3.68387e+06	164266	FALSE	33456.8	TRUE	3	9					41.0371	0.995222	-3.6624	87.5186	0.672724	0.0488379	FALSE
16	A16	Sample 49	20.0809	N2	FAM	UNKNOWN	FAM	NFQ-MGB	Inconclusive	36.2658	36.2658	0.94242				FALSE	33456.8	TRUE	3	30					41.0371	0.995222	-3.6624	87.5186	0.672724	0.0488379	FALSE		Duo	Female	1.4	0.916141	100	150	1200	3	100	13	MADKV21
17	A17	Sample 49		N2	FAM	UNKNOWN	FAM	NFQ-MGB	No Amp	Undetermined	36.2658	0				FALSE	33456.8	TRUE	3	39					41.0371	0.995222	-3.6624	87.5186	0.672724	0.0488379	FALSE
18	A18	Sample 49		N2	FAM	UNKNOWN	FAM	NFQ-MGB	No Amp	Undetermined	36.2658	0				FALSE	33456.8	TRUE	3	39					41.0371	0.995222	-3.6624	87.5186	0.672724	0.0488379	FALSE
40	B16	Sample 50	9.4912	N2	FAM	UNKNOWN	FAM	NFQ-MGB	Inconclusive	37.4578	36.5977	0.907567	1.06716	19.0787	13.5135	FALSE	33456.8	TRUE	3	28					41.0371	0.995222	-3.6624	87.5186	0.672724	0.0488379	FALSE		Kid	Female	1.4	0.5	100	150	1200	3	100	63	MADKV21
41	B17	Sample 50	13.2106	N2	FAM	UNKNOWN	FAM	NFQ-MGB	Inconclusive	36.9318	36.5977	0.937704	1.06716	19.0787	13.5135	FALSE	33456.8	TRUE	3	29					41.0371	0.995222	-3.6624	87.5186	0.672724	0.0488379	FALSE
42	B18	Sample 50	34.5343	N2	FAM	UNKNOWN	FAM	NFQ-MGB	Amp	35.4034	36.5977	0.967393	1.06716	19.0787	13.5135	FALSE	33456.8	TRUE	3	30					41.0371	0.995222	-3.6624	87.5186	0.672724	0.0488379	FALSE
64	C16	Sample 51	6.63591	N2	FAM	UNKNOWN	FAM	NFQ-MGB	Inconclusive	38.027	38.1538	0.887501	0.755165	6.57819	2.86891	FALSE	33456.8	TRUE	3	32					41.0371	0.995222	-3.6624	87.5186	0.672724	0.0488379	FALSE		Stom	Female	1.4	0.5	100	150	1200	3	100	32	MADKV21
65	C17	Sample 51	3.68085	N2	FAM	UNKNOWN	FAM	NFQ-MGB	Inconclusive	38.9644	38.1538	0.0395469	0.755165	6.57819	2.86891	FALSE	33456.8	TRUE	3	39					41.0371	0.995222	-3.6624	87.5186	0.672724	0.0488379	FALSE
66	C18	Sample 51	9.41781	N2	FAM	UNKNOWN	FAM	NFQ-MGB	Inconclusive	37.4701	38.1538	0.935409	0.755165	6.57819	2.86891	FALSE	33456.8	TRUE	3	27					41.0371	0.995222	-3.6624	87.5186	0.672724	0.0488379	FALSE
88	D16	Sample 52	92.5702	N2	FAM	UNKNOWN	FAM	NFQ-MGB	Amp	33.8351	33.4363	0.979252	0.374747	121.124	27.6391	FALSE	33456.8	TRUE	3	26					41.0371	0.995222	-3.6624	87.5186	0.672724	0.0488379	FALSE		Hrt	Female	1.4	1.55438	100	150	1200	3	100	53	MADKV21
89	D17	Sample 52	147.747	N2	FAM	UNKNOWN	FAM	NFQ-MGB	Amp	33.0915	33.4363	0.967134	0.374747	121.124	27.6391	FALSE	33456.8	TRUE	3	26					41.0371	0.995222	-3.6624	87.5186	0.672724	0.0488379	FALSE
90	D18	Sample 52	123.055	N2	FAM	UNKNOWN	FAM	NFQ-MGB	Amp	33.3823	33.4363	0.983249	0.374747	121.124	27.6391	FALSE	33456.8	TRUE	3	26					41.0371	0.995222	-3.6624	87.5186	0.672724	0.0488379	FALSE
112	E16	Sample 53	25.2497	N2	FAM	UNKNOWN	FAM	NFQ-MGB	Amp	35.9015	36.8011	0.954869	0.83551	15.7533	8.4792	FALSE	33456.8	TRUE	3	28					41.0371	0.995222	-3.6624	87.5186	0.672724	0.0488379	FALSE		Livr	Female	1.4	0.5	100	150	1200	3	100	28	MADKV21
113	E17	Sample 53	8.94099	N2	FAM	UNKNOWN	FAM	NFQ-MGB	Inconclusive	37.5527	36.8011	0.937328	0.83551	15.7533	8.4792	FALSE	33456.8	TRUE	3	27					41.0371	0.995222	-3.6624	87.5186	0.672724	0.0488379	FALSE
114	E18	Sample 53	13.0693	N2	FAM	UNKNOWN	FAM	NFQ-MGB	Inconclusive	36.9489	36.8011	0.943551	0.83551	15.7533	8.4792	FALSE	33456.8	TRUE	3	25					41.0371	0.995222	-3.6624	87.5186	0.672724	0.0488379	FALSE
136	F16	Sample 54	86.3521	N2	FAM	UNKNOWN	FAM	NFQ-MGB	Amp	33.9457	33.3137	0.963724	0.55057	133.338	41.1113	FALSE	33456.8	TRUE	3	25					41.0371	0.995222	-3.6624	87.5186	0.672724	0.0488379	FALSE		Spln	Female	1.4	1.46015	100	150	1200	3	100	8	MADKV21
137	F17	Sample 54	162.695	N2	FAM	UNKNOWN	FAM	NFQ-MGB	Amp	32.9382	33.3137	0.974592	0.55057	133.338	41.1113	FALSE	33456.8	TRUE	3	25					41.0371	0.995222	-3.6624	87.5186	0.672724	0.0488379	FALSE
138	F18	Sample 54	150.967	N2	FAM	UNKNOWN	FAM	NFQ-MGB	Amp	33.0572	33.3137	0.964834	0.55057	133.338	41.1113	FALSE	33456.8	TRUE	3	24					41.0371	0.995222	-3.6624	87.5186	0.672724	0.0488379	FALSE
160	G16	Sample 55	547935	N2	FAM	UNKNOWN	FAM	NFQ-MGB	Amp	20.0196	20.0858	0.981567	0.0573633	525824	19156.2	FALSE	33456.8	TRUE	3	11					41.0371	0.995222	-3.6624	87.5186	0.672724	0.0488379	FALSE		Lung	Female	1.4	1.03564	100	150	1200	3	100	22	MADKV21
161	G17	Sample 55	515312	N2	FAM	UNKNOWN	FAM	NFQ-MGB	Amp	20.1172	20.0858	0.983985	0.0573633	525824	19156.2	FALSE	33456.8	TRUE	3	14					41.0371	0.995222	-3.6624	87.5186	0.672724	0.0488379	FALSE
162	G18	Sample 55	514225	N2	FAM	UNKNOWN	FAM	NFQ-MGB	Amp	20.1206	20.0858	0.979253	0.0573633	525824	19156.2	FALSE	33456.8	TRUE	3	14					41.0371	0.995222	-3.6624	87.5186	0.672724	0.0488379	FALSE
208	I16	Sample 57		N2	FAM	UNKNOWN	FAM	NFQ-MGB	No Amp	Undetermined		0				FALSE	33456.8	TRUE	3	39					41.0371	0.995222	-3.6624	87.5186	0.672724	0.0488379	FALSE		Duo	Female	2.4	0.5	100	150	1200	3	100	24	MADKV21
209	I17	Sample 57		N2	FAM	UNKNOWN	FAM	NFQ-MGB	No Amp	Undetermined		0				FALSE	33456.8	TRUE	3	39					41.0371	0.995222	-3.6624	87.5186	0.672724	0.0488379	FALSE
210	I18	Sample 57		N2	FAM	UNKNOWN	FAM	NFQ-MGB	No Amp	Undetermined		0				FALSE	33456.8	TRUE	3	39					41.0371	0.995222	-3.6624	87.5186	0.672724	0.0488379	FALSE
232	J16	Sample 58		N2	FAM	UNKNOWN	FAM	NFQ-MGB	No Amp	Undetermined		0				FALSE	33456.8	TRUE	3	39					41.0371	0.995222	-3.6624	87.5186	0.672724	0.0488379	FALSE		Kid	Female	2.4	0.5	100	150	1200	3	100	55	MADKV21
233	J17	Sample 58		N2	FAM	UNKNOWN	FAM	NFQ-MGB	No Amp	Undetermined		0				FALSE	33456.8	TRUE	3	39					41.0371	0.995222	-3.6624	87.5186	0.672724	0.0488379	FALSE
234	J18	Sample 58		N2	FAM	UNKNOWN	FAM	NFQ-MGB	No Amp	Undetermined		0				FALSE	33456.8	TRUE	3	39					41.0371	0.995222	-3.6624	87.5186	0.672724	0.0488379	FALSE
256	K16	Sample 59	258.03	N2	FAM	UNKNOWN	FAM	NFQ-MGB	Amp	32.2046	32.275	0.974153	0.0762944	247.044	11.7882	FALSE	33456.8	TRUE	3	25					41.0371	0.995222	-3.6624	87.5186	0.672724	0.0488379	FALSE		Stom	Female	2.4	0.474562	100	150	1200	3	100	41	MADKV21
257	K17	Sample 59	248.51	N2	FAM	UNKNOWN	FAM	NFQ-MGB	Amp	32.2644	32.275	0.976711	0.0762944	247.044	11.7882	FALSE	33456.8	TRUE	3	26					41.0371	0.995222	-3.6624	87.5186	0.672724	0.0488379	FALSE
258	K18	Sample 59	234.591	N2	FAM	UNKNOWN	FAM	NFQ-MGB	Amp	32.3561	32.275	0.984022	0.0762944	247.044	11.7882	FALSE	33456.8	TRUE	3	23					41.0371	0.995222	-3.6624	87.5186	0.672724	0.0488379	FALSE
280	L16	Sample 60	45.3944	N2	FAM	UNKNOWN	FAM	NFQ-MGB	Amp	34.9685	36.2743	0.956006	1.48112	25.6098	19.107	FALSE	33456.8	TRUE	3	25					41.0371	0.995222	-3.6624	87.5186	0.672724	0.0488379	FALSE		Hrt	Female	2.4	1.72193	100	150	1200	3	100	45	MADKV21
281	L17	Sample 60	24.1735	N2	FAM	UNKNOWN	FAM	NFQ-MGB	Amp	35.9708	36.2743	0.970187	1.48112	25.6098	19.107	FALSE	33456.8	TRUE	3	29					41.0371	0.995222	-3.6624	87.5186	0.672724	0.0488379	FALSE
282	L18	Sample 60	7.2614	N2	FAM	UNKNOWN	FAM	NFQ-MGB	Inconclusive	37.8837	36.2743	0.941261	1.48112	25.6098	19.107	FALSE	33456.8	TRUE	3	32					41.0371	0.995222	-3.6624	87.5186	0.672724	0.0488379	FALSE
304	M16	Sample 61		N2	FAM	UNKNOWN	FAM	NFQ-MGB	No Amp	Undetermined	37.3433	0	0.0367548			FALSE	33456.8	TRUE	3	39					41.0371	0.995222	-3.6624	87.5186	0.672724	0.0488379	FALSE		Livr	Female	2.4	0.5	100	150	1200	3	100	53	MADKV21
305	M17	Sample 61	10.3672	N2	FAM	UNKNOWN	FAM	NFQ-MGB	Amp	37.3173	37.3433	0.947305	0.0367548			FALSE	33456.8	TRUE	3	26					41.0371	0.995222	-3.6624	87.5186	0.672724	0.0488379	FALSE
306	M18	Sample 61	10.0338	N2	FAM	UNKNOWN	FAM	NFQ-MGB	Inconclusive	37.3693	37.3433	0.923877	0.0367548			FALSE	33456.8	TRUE	3	28					41.0371	0.995222	-3.6624	87.5186	0.672724	0.0488379	FALSE
328	N16	Sample 62	13.0208	N2	FAM	UNKNOWN	FAM	NFQ-MGB	Amp	36.9549	38.0471	0.936524	1.54473			FALSE	33456.8	TRUE	3	24					41.0371	0.995222	-3.6624	87.5186	0.672724	0.0488379	FALSE		Spln	Female	2.4	0.675217	100	150	1200	3	100	26	MADKV21
329	N17	Sample 62		N2	FAM	UNKNOWN	FAM	NFQ-MGB	No Amp	Undetermined	38.0471	0	1.54473			FALSE	33456.8	TRUE	3	39					41.0371	0.995222	-3.6624	87.5186	0.672724	0.0488379	FALSE
330	N18	Sample 62	3.29722	N2	FAM	UNKNOWN	FAM	NFQ-MGB	Inconclusive	39.1394	38.0471	0	1.54473			FALSE	33456.8	TRUE	3	29					41.0371	0.995222	-3.6624	87.5186	0.672724	0.0488379	FALSE
352	O16	Sample 63	185070	N2	FAM	UNKNOWN	FAM	NFQ-MGB	Amp	21.746	21.6611	0.984139	0.0875947	195419	10783.7	FALSE	33456.8	TRUE	3	15					41.0371	0.995222	-3.6624	87.5186	0.672724	0.0488379	FALSE		Lung	Female	2.4	0.68661	100	150	1200	3	100	33	MADKV21
353	O17	Sample 63	206591	N2	FAM	UNKNOWN	FAM	NFQ-MGB	Amp	21.571	21.6611	0.983866	0.0875947	195419	10783.7	FALSE	33456.8	TRUE	3	12					41.0371	0.995222	-3.6624	87.5186	0.672724	0.0488379	FALSE
354	O18	Sample 63	194595	N2	FAM	UNKNOWN	FAM	NFQ-MGB	Amp	21.6662	21.6611	0.982395	0.0875947	195419	10783.7	FALSE	33456.8	TRUE	3	15					41.0371	0.995222	-3.6624	87.5186	0.672724	0.0488379	FALSE
19	A19	Sample 64	64.1454	N2	FAM	UNKNOWN	FAM	NFQ-MGB	Amp	34.4185	34.4869	0.973837	0.867759	67.5609	34.5004	FALSE	33456.8	TRUE	3	26					41.0371	0.995222	-3.6624	87.5186	0.672724	0.0488379	FALSE		Duo	Female	3.4	0.310302	100	150	1200	3	100	27	MADKV21
20	A20	Sample 64	103.642	N2	FAM	UNKNOWN	FAM	NFQ-MGB	Amp	33.6554	34.4869	0.960309	0.867759	67.5609	34.5004	FALSE	33456.8	TRUE	3	25					41.0371	0.995222	-3.6624	87.5186	0.672724	0.0488379	FALSE
21	A21	Sample 64	34.8953	N2	FAM	UNKNOWN	FAM	NFQ-MGB	Amp	35.3869	34.4869	0.971843	0.867759	67.5609	34.5004	FALSE	33456.8	TRUE	3	29					41.0371	0.995222	-3.6624	87.5186	0.672724	0.0488379	FALSE
43	B19	Sample 65	6.02146	N2	FAM	UNKNOWN	FAM	NFQ-MGB	Inconclusive	38.1815	38.1815	0.894327				FALSE	33456.8	TRUE	3	31					41.0371	0.995222	-3.6624	87.5186	0.672724	0.0488379	FALSE		Kid	Female	3.4	0.5	100	150	1200	3	100	83	MADKV21
44	B20	Sample 65		N2	FAM	UNKNOWN	FAM	NFQ-MGB	No Amp	Undetermined	38.1815	0				FALSE	33456.8	TRUE	3	39					41.0371	0.995222	-3.6624	87.5186	0.672724	0.0488379	FALSE
45	B21	Sample 65		N2	FAM	UNKNOWN	FAM	NFQ-MGB	No Amp	Undetermined	38.1815	0				FALSE	33456.8	TRUE	3	39					41.0371	0.995222	-3.6624	87.5186	0.672724	0.0488379	FALSE
67	C19	Sample 66	80.5457	N2	FAM	UNKNOWN	FAM	NFQ-MGB	Amp	34.0564	34.2121	0.967122	0.174157	73.3228	7.89798	FALSE	33456.8	TRUE	3	24					41.0371	0.995222	-3.6624	87.5186	0.672724	0.0488379	FALSE		Stom	Female	3.4	0.5	100	150	1200	3	100	34	MADKV21
68	C20	Sample 66	64.8895	N2	FAM	UNKNOWN	FAM	NFQ-MGB	Amp	34.4002	34.2121	0.979262	0.174157	73.3228	7.89798	FALSE	33456.8	TRUE	3	27					41.0371	0.995222	-3.6624	87.5186	0.672724	0.0488379	FALSE
69	C21	Sample 66	74.5333	N2	FAM	UNKNOWN	FAM	NFQ-MGB	Amp	34.1798	34.2121	0.965945	0.174157	73.3228	7.89798	FALSE	33456.8	TRUE	3	26					41.0371	0.995222	-3.6624	87.5186	0.672724	0.0488379	FALSE
91	D19	Sample 67	5.93822	N2	FAM	UNKNOWN	FAM	NFQ-MGB	Inconclusive	38.2037	38.2037	0.898475				FALSE	33456.8	TRUE	3	31					41.0371	0.995222	-3.6624	87.5186	0.672724	0.0488379	FALSE		Hrt	Female	3.4	0.5	100	150	1200	3	100	34	MADKV21
92	D20	Sample 67		N2	FAM	UNKNOWN	FAM	NFQ-MGB	No Amp	Undetermined	38.2037	0				FALSE	33456.8	TRUE	3	39					41.0371	0.995222	-3.6624	87.5186	0.672724	0.0488379	FALSE
93	D21	Sample 67		N2	FAM	UNKNOWN	FAM	NFQ-MGB	No Amp	Undetermined	38.2037	0				FALSE	33456.8	TRUE	3	39					41.0371	0.995222	-3.6624	87.5186	0.672724	0.0488379	FALSE
115	E19	Sample 68		N2	FAM	UNKNOWN	FAM	NFQ-MGB	No Amp	Undetermined		0				FALSE	33456.8	TRUE	3	39					41.0371	0.995222	-3.6624	87.5186	0.672724	0.0488379	FALSE		Livr	Female	3.4	0.5	100	150	1200	3	100	63	MADKV21
116	E20	Sample 68		N2	FAM	UNKNOWN	FAM	NFQ-MGB	No Amp	Undetermined		0				FALSE	33456.8	TRUE	3	39					41.0371	0.995222	-3.6624	87.5186	0.672724	0.0488379	FALSE
117	E21	Sample 68		N2	FAM	UNKNOWN	FAM	NFQ-MGB	No Amp	Undetermined		0				FALSE	33456.8	TRUE	3	39					41.0371	0.995222	-3.6624	87.5186	0.672724	0.0488379	FALSE
139	F19	Sample 69	14.0992	N2	FAM	UNKNOWN	FAM	NFQ-MGB	Amp	36.8283	37.9029	0.948341	1.12983	8.39188	5.37708	FALSE	33456.8	TRUE	3	26					41.0371	0.995222	-3.6624	87.5186	0.672724	0.0488379	FALSE		Spln	Female	3.4	2.53261	100	150	1200	3	100	15	MADKV21
140	F20	Sample 69	7.65554	N2	FAM	UNKNOWN	FAM	NFQ-MGB	Inconclusive	37.7996	37.9029	0.917447	1.12983	8.39188	5.37708	FALSE	33456.8	TRUE	3	31					41.0371	0.995222	-3.6624	87.5186	0.672724	0.0488379	FALSE
141	F21	Sample 69	3.42091	N2	FAM	UNKNOWN	FAM	NFQ-MGB	Inconclusive	39.0809	37.9029	0	1.12983	8.39188	5.37708	FALSE	33456.8	TRUE	3	27					41.0371	0.995222	-3.6624	87.5186	0.672724	0.0488379	FALSE
163	G19	Sample 70	349043	N2	FAM	UNKNOWN	FAM	NFQ-MGB	Amp	20.7369	20.7527	0.987266	0.0717307	345818	15480.6	FALSE	33456.8	TRUE	3	14					41.0371	0.995222	-3.6624	87.5186	0.672724	0.0488379	FALSE		Lung	Female	3.4	0.648042	100	150	1200	3	100	34	MADKV21
164	G20	Sample 70	359433	N2	FAM	UNKNOWN	FAM	NFQ-MGB	Amp	20.6902	20.7527	0.986432	0.0717307	345818	15480.6	FALSE	33456.8	TRUE	3	13					41.0371	0.995222	-3.6624	87.5186	0.672724	0.0488379	FALSE
165	G21	Sample 70	328979	N2	FAM	UNKNOWN	FAM	NFQ-MGB	Amp	20.831	20.7527	0.989296	0.0717307	345818	15480.6	FALSE	33456.8	TRUE	3	15					41.0371	0.995222	-3.6624	87.5186	0.672724	0.0488379	FALSE
211	I19	Sample 71	46.2188	N2	FAM	UNKNOWN	FAM	NFQ-MGB	Amp	34.9399	34.9151	0.971925	0.329157	47.6223	9.91442	FALSE	33456.8	TRUE	3	29					41.0371	0.995222	-3.6624	87.5186	0.672724	0.0488379	FALSE		Duo	Female	2.7	3.11594	100	150	1200	3	100	12	MADKV21
212	I20	Sample 71	58.1637	N2	FAM	UNKNOWN	FAM	NFQ-MGB	Amp	34.5742	34.9151	0.964696	0.329157	47.6223	9.91442	FALSE	33456.8	TRUE	3	24					41.0371	0.995222	-3.6624	87.5186	0.672724	0.0488379	FALSE
213	I21	Sample 71	38.4844	N2	FAM	UNKNOWN	FAM	NFQ-MGB	Amp	35.2312	34.9151	0.97398	0.329157	47.6223	9.91442	FALSE	33456.8	TRUE	3	26					41.0371	0.995222	-3.6624	87.5186	0.672724	0.0488379	FALSE
235	J19	Sample 72		N2	FAM	UNKNOWN	FAM	NFQ-MGB	No Amp	Undetermined		0				FALSE	33456.8	TRUE	3	39					41.0371	0.995222	-3.6624	87.5186	0.672724	0.0488379	FALSE		Kid	Female	2.7	1.80999	100	150	1200	3	100	34	MADKV21
236	J20	Sample 72		N2	FAM	UNKNOWN	FAM	NFQ-MGB	No Amp	Undetermined		0				FALSE	33456.8	TRUE	3	39					41.0371	0.995222	-3.6624	87.5186	0.672724	0.0488379	FALSE
237	J21	Sample 72		N2	FAM	UNKNOWN	FAM	NFQ-MGB	No Amp	Undetermined		0				FALSE	33456.8	TRUE	3	39					41.0371	0.995222	-3.6624	87.5186	0.672724	0.0488379	FALSE
259	K19	Sample 73	39.0341	N2	FAM	UNKNOWN	FAM	NFQ-MGB	Amp	35.2086	34.9967	0.976791	0.256422	44.9927	7.45352	FALSE	33456.8	TRUE	3	26					41.0371	0.995222	-3.6624	87.5186	0.672724	0.0488379	FALSE		Stom	Female	2.7	0.5	100	150	1200	3	100	50	MADKV21
260	K20	Sample 73	53.3503	N2	FAM	UNKNOWN	FAM	NFQ-MGB	Amp	34.7116	34.9967	0.980221	0.256422	44.9927	7.45352	FALSE	33456.8	TRUE	3	28					41.0371	0.995222	-3.6624	87.5186	0.672724	0.0488379	FALSE
261	K21	Sample 73	42.5937	N2	FAM	UNKNOWN	FAM	NFQ-MGB	Amp	35.0698	34.9967	0.963729	0.256422	44.9927	7.45352	FALSE	33456.8	TRUE	3	28					41.0371	0.995222	-3.6624	87.5186	0.672724	0.0488379	FALSE
283	L19	Sample 74	9.9552	N2	FAM	UNKNOWN	FAM	NFQ-MGB	Amp	37.3818	37.7084	0.953663	0.475095	8.33709	2.25979	FALSE	33456.8	TRUE	3	29					41.0371	0.995222	-3.6624	87.5186	0.672724	0.0488379	FALSE		Hrt	Female	2.7	5.23382	100	150	1200	3	100	20	MADKV21
284	L20	Sample 74	9.30087	N2	FAM	UNKNOWN	FAM	NFQ-MGB	Amp	37.49	37.7084	0.955165	0.475095	8.33709	2.25979	FALSE	33456.8	TRUE	3	28					41.0371	0.995222	-3.6624	87.5186	0.672724	0.0488379	FALSE
285	L21	Sample 74	5.75521	N2	FAM	UNKNOWN	FAM	NFQ-MGB	Inconclusive	38.2535	37.7084	0.871261	0.475095	8.33709	2.25979	FALSE	33456.8	TRUE	3	29					41.0371	0.995222	-3.6624	87.5186	0.672724	0.0488379	FALSE
307	M19	Sample 75		N2	FAM	UNKNOWN	FAM	NFQ-MGB	No Amp	Undetermined		0				FALSE	33456.8	TRUE	3	39					41.0371	0.995222	-3.6624	87.5186	0.672724	0.0488379	FALSE		Livr	Female	2.7	0.5	100	150	1200	3	100	26	MADKV21
308	M20	Sample 75		N2	FAM	UNKNOWN	FAM	NFQ-MGB	No Amp	Undetermined		0				FALSE	33456.8	TRUE	3	39					41.0371	0.995222	-3.6624	87.5186	0.672724	0.0488379	FALSE
309	M21	Sample 75		N2	FAM	UNKNOWN	FAM	NFQ-MGB	No Amp	Undetermined		0				FALSE	33456.8	TRUE	3	39					41.0371	0.995222	-3.6624	87.5186	0.672724	0.0488379	FALSE
331	N19	Sample 76		N2	FAM	UNKNOWN	FAM	NFQ-MGB	No Amp	Undetermined	39.7631	0				FALSE	33456.8	TRUE	3	39					41.0371	0.995222	-3.6624	87.5186	0.672724	0.0488379	FALSE		Spln	Female	2.7	1.42879	100	150	1200	3	100	7	MADKV21
332	N20	Sample 76		N2	FAM	UNKNOWN	FAM	NFQ-MGB	No Amp	Undetermined	39.7631	0				FALSE	33456.8	TRUE	3	39					41.0371	0.995222	-3.6624	87.5186	0.672724	0.0488379	FALSE
333	N21	Sample 76	2.22769	N2	FAM	UNKNOWN	FAM	NFQ-MGB	Inconclusive	39.7631	39.7631	0				FALSE	33456.8	TRUE	3	33					41.0371	0.995222	-3.6624	87.5186	0.672724	0.0488379	FALSE
355	O19	Sample 77	10793.6	N2	FAM	UNKNOWN	FAM	NFQ-MGB	Amp	26.266	26.3135	0.98491	0.0411505	10478.3	273.084	FALSE	33456.8	TRUE	3	19					41.0371	0.995222	-3.6624	87.5186	0.672724	0.0488379	FALSE		Lung	Female	2.7	0.491634	100	150	1200	3	100	26	MADKV21
356	O20	Sample 77	10317.7	N2	FAM	UNKNOWN	FAM	NFQ-MGB	Amp	26.3378	26.3135	0.97926	0.0411505	10478.3	273.084	FALSE	33456.8	TRUE	3	17					41.0371	0.995222	-3.6624	87.5186	0.672724	0.0488379	FALSE
357	O21	Sample 77	10323.6	N2	FAM	UNKNOWN	FAM	NFQ-MGB	Amp	26.3368	26.3135	0.984141	0.0411505	10478.3	273.084	FALSE	33456.8	TRUE	3	17					41.0371	0.995222	-3.6624	87.5186	0.672724	0.0488379	FALSE
22	A22	Sample 78		N2	FAM	UNKNOWN	FAM	NFQ-MGB	No Amp	Undetermined		0				FALSE	33456.8	TRUE	3	39					41.0371	0.995222	-3.6624	87.5186	0.672724	0.0488379	FALSE		Duo	Female	3.7	1.20708	100	150	1200	3	100	12	MADKV21
23	A23	Sample 78		N2	FAM	UNKNOWN	FAM	NFQ-MGB	No Amp	Undetermined		0				FALSE	33456.8	TRUE	3	39					41.0371	0.995222	-3.6624	87.5186	0.672724	0.0488379	FALSE
24	A24	Sample 78		N2	FAM	UNKNOWN	FAM	NFQ-MGB	No Amp	Undetermined		0				FALSE	33456.8	TRUE	3	39					41.0371	0.995222	-3.6624	87.5186	0.672724	0.0488379	FALSE
46	B22	Sample 79		N2	FAM	UNKNOWN	FAM	NFQ-MGB	No Amp	Undetermined	36.7687	0	0.263596			FALSE	33456.8	TRUE	3	39					41.0371	0.995222	-3.6624	87.5186	0.672724	0.0488379	FALSE		Kid	Female	3.7	1.18838	100	150	1200	3	100	37	MADKV21
47	B23	Sample 79	16.4569	N2	FAM	UNKNOWN	FAM	NFQ-MGB	Amp	36.5823	36.7687	0.957977	0.263596			FALSE	33456.8	TRUE	3	30					41.0371	0.995222	-3.6624	87.5186	0.672724	0.0488379	FALSE
48	B24	Sample 79	13.0185	N2	FAM	UNKNOWN	FAM	NFQ-MGB	Amp	36.9551	36.7687	0.951722	0.263596			FALSE	33456.8	TRUE	3	31					41.0371	0.995222	-3.6624	87.5186	0.672724	0.0488379	FALSE
70	C22	Sample 80	27.4845	N2	FAM	UNKNOWN	FAM	NFQ-MGB	Amp	35.7666	37.4102	0.962495	1.65405	13.6086	12.445	FALSE	33456.8	TRUE	3	28					41.0371	0.995222	-3.6624	87.5186	0.672724	0.0488379	FALSE		Stom	Female	3.7	1.63852	100	150	1200	3	100	17	MADKV21
71	C23	Sample 80	3.43462	N2	FAM	UNKNOWN	FAM	NFQ-MGB	Inconclusive	39.0745	37.4102	0	1.65405	13.6086	12.445	FALSE	33456.8	TRUE	3	33					41.0371	0.995222	-3.6624	87.5186	0.672724	0.0488379	FALSE
72	C24	Sample 80	9.9066	N2	FAM	UNKNOWN	FAM	NFQ-MGB	Inconclusive	37.3896	37.4102	0.93442	1.65405	13.6086	12.445	FALSE	33456.8	TRUE	3	31					41.0371	0.995222	-3.6624	87.5186	0.672724	0.0488379	FALSE
94	D22	Sample 81	3.13761	N2	FAM	UNKNOWN	FAM	NFQ-MGB	Inconclusive	39.2184	38.4626	0	1.0688			FALSE	33456.8	TRUE	3	33					41.0371	0.995222	-3.6624	87.5186	0.672724	0.0488379	FALSE		Hrt	Female	3.7	3.56513	100	150	1200	3	100	27	MADKV21
95	D23	Sample 81	8.11538	N2	FAM	UNKNOWN	FAM	NFQ-MGB	Amp	37.7068	38.4626	0.951515	1.0688			FALSE	33456.8	TRUE	3	29					41.0371	0.995222	-3.6624	87.5186	0.672724	0.0488379	FALSE
96	D24	Sample 81		N2	FAM	UNKNOWN	FAM	NFQ-MGB	No Amp	Undetermined	38.4626	0	1.0688			FALSE	33456.8	TRUE	3	39					41.0371	0.995222	-3.6624	87.5186	0.672724	0.0488379	FALSE
118	E22	Sample 82		N2	FAM	UNKNOWN	FAM	NFQ-MGB	No Amp	Undetermined	38.7852	0				FALSE	33456.8	TRUE	3	39					41.0371	0.995222	-3.6624	87.5186	0.672724	0.0488379	FALSE		Livr	Female	3.7	0.5	100	150	1200	3	100	27	MADKV21
119	E23	Sample 82		N2	FAM	UNKNOWN	FAM	NFQ-MGB	No Amp	Undetermined	38.7852	0				FALSE	33456.8	TRUE	3	39					41.0371	0.995222	-3.6624	87.5186	0.672724	0.0488379	FALSE
120	E24	Sample 82	4.11985	N2	FAM	UNKNOWN	FAM	NFQ-MGB	Inconclusive	38.7852	38.7852	0.316976				FALSE	33456.8	TRUE	3	32					41.0371	0.995222	-3.6624	87.5186	0.672724	0.0488379	FALSE
142	F22	Sample 83	3.25255	N2	FAM	UNKNOWN	FAM	NFQ-MGB	Inconclusive	39.1611	38.3148	0	1.19692			FALSE	33456.8	TRUE	3	32					41.0371	0.995222	-3.6624	87.5186	0.672724	0.0488379	FALSE		Spln	Female	3.7	0.5	100	150	1200	3	100	17	MADKV21
143	F23	Sample 83	9.42775	N2	FAM	UNKNOWN	FAM	NFQ-MGB	Amp	37.4684	38.3148	0.94131	1.19692			FALSE	33456.8	TRUE	3	29					41.0371	0.995222	-3.6624	87.5186	0.672724	0.0488379	FALSE
144	F24	Sample 83		N2	FAM	UNKNOWN	FAM	NFQ-MGB	No Amp	Undetermined	38.3148	0	1.19692			FALSE	33456.8	TRUE	3	39					41.0371	0.995222	-3.6624	87.5186	0.672724	0.0488379	FALSE
166	G22	Sample 84	6017.26	N2	FAM	UNKNOWN	FAM	NFQ-MGB	Amp	27.1954	27.1106	0.982174	0.0955983	6354.75	384.99	FALSE	33456.8	TRUE	3	19					41.0371	0.995222	-3.6624	87.5186	0.672724	0.0488379	FALSE		Lung	Female	3.7	0.720942	100	150	1200	3	100	18	MADKV21
167	G23	Sample 84	6774.08	N2	FAM	UNKNOWN	FAM	NFQ-MGB	Amp	27.007	27.1106	0.981317	0.0955983	6354.75	384.99	FALSE	33456.8	TRUE	3	20					41.0371	0.995222	-3.6624	87.5186	0.672724	0.0488379	FALSE
168	G24	Sample 84	6272.92	N2	FAM	UNKNOWN	FAM	NFQ-MGB	Amp	27.1292	27.1106	0.980265	0.0955983	6354.75	384.99	FALSE	33456.8	TRUE	3	18					41.0371	0.995222	-3.6624	87.5186	0.672724	0.0488379	FALSE
File Name	X:\TheLounge\Personal_Sharing Folders\Megan K\QuantStudio5\MADKV20F 21f lung N2 TITER.eds
Comment
Operator	DEFAULT
Barcode
Instrument Type	QuantStudio™ 5 System
Block Type	384-Well Block
Instrument Name	Gale-Lab-QuantStudio
Instrument Serial Number	272532607
Heated Cover Serial Number
Block Serial Number	20525021
Run Start Date/Time	2021-12-22 12:03:30 PM PST
Run End Date/Time	2021-12-22 01:37:48 PM PST
Run Duration	94 minutes 17 seconds
Sample Volume	10.0
Cover Temperature	105.0
Passive Reference	NONE
PCR Stage/Step Number	Stage 2 Step 2
Quantification Cycle Method	CT
Analysis Date/Time	2022-01-03 04:21:58 PM PST
Software Name and Version	Design & Analysis Software v2.5.1
Plugin Name and Version	Primary Analysis v1.6.0, Standard Curve v1.5.1
Exported On	2022-01-03 04:22:21 PM PST
Well	Well Position	Sample	Quantity	Target	Dye	Task	Reporter	Quencher	Amp Status	Cq	Cq Mean	Cq Confidence	Cq SD	Quantity Mean	Quantity SD	Auto Threshold	Threshold	Auto Baseline	Baseline Start	Baseline End	Tm1	Tm2	Tm3	Tm4	Y-Intercept	R2	Slope	Efficiency	Standard Deviation	Standard Error	Omit		Sample	Tissue	Gender	Label	uL RNA for 200ng	uL cDNA	uL Sample input uL	Trizol/Chloroform total Volume	uL cDNA/well	uL RNA eluted	Tissue weight mg	MADKV21
265	L1	0.9375	0.9375	N2	FAM	STANDARD	FAM	NFQ-MGB	Inconclusive	38.3247	38.3247	0.757452				FALSE	28536.5	TRUE	3	30					39.7084	0.994257	-3.5331	91.8837	0.734267	0.0507447	FALSE
266	L2	0.9375	0.9375	N2	FAM	STANDARD	FAM	NFQ-MGB	No Amp	Undetermined	38.3247	0				FALSE	28536.5	TRUE	3	39					39.7084	0.994257	-3.5331	91.8837	0.734267	0.0507447	FALSE
267	L3	0.9375	0.9375	N2	FAM	STANDARD	FAM	NFQ-MGB	No Amp	Undetermined	38.3247	0				FALSE	28536.5	TRUE	3	39					39.7084	0.994257	-3.5331	91.8837	0.734267	0.0507447	FALSE
241	K1	1.875	1.875	N2	FAM	STANDARD	FAM	NFQ-MGB	No Amp	Undetermined	37.2655	0				FALSE	28536.5	TRUE	3	39					39.7084	0.994257	-3.5331	91.8837	0.734267	0.0507447	FALSE
242	K2	1.875	1.875	N2	FAM	STANDARD	FAM	NFQ-MGB	No Amp	Undetermined	37.2655	0				FALSE	28536.5	TRUE	3	39					39.7084	0.994257	-3.5331	91.8837	0.734267	0.0507447	FALSE
243	K3	1.875	1.875	N2	FAM	STANDARD	FAM	NFQ-MGB	Amp	37.2655	37.2655	0.94074				FALSE	28536.5	TRUE	3	31					39.7084	0.994257	-3.5331	91.8837	0.734267	0.0507447	FALSE
217	J1	3.75	3.75	N2	FAM	STANDARD	FAM	NFQ-MGB	Amp	36.4626	36.6336	0.953691	0.241827			FALSE	28536.5	TRUE	3	31					39.7084	0.994257	-3.5331	91.8837	0.734267	0.0507447	FALSE
218	J2	3.75	3.75	N2	FAM	STANDARD	FAM	NFQ-MGB	No Amp	Undetermined	36.6336	0	0.241827			FALSE	28536.5	TRUE	3	39					39.7084	0.994257	-3.5331	91.8837	0.734267	0.0507447	FALSE
219	J3	3.75	3.75	N2	FAM	STANDARD	FAM	NFQ-MGB	Amp	36.8046	36.6336	0.957618	0.241827			FALSE	28536.5	TRUE	3	27					39.7084	0.994257	-3.5331	91.8837	0.734267	0.0507447	FALSE
194	I2	7.5	7.5	N2	FAM	STANDARD	FAM	NFQ-MGB	Inconclusive	37.6049	37.2638	0.919427	0.482295			FALSE	28536.5	TRUE	3	29					39.7084	0.994257	-3.5331	91.8837	0.734267	0.0507447	FALSE
195	I3	7.5	7.5	N2	FAM	STANDARD	FAM	NFQ-MGB	Amp	36.9228	37.2638	0.95104	0.482295			FALSE	28536.5	TRUE	3	28					39.7084	0.994257	-3.5331	91.8837	0.734267	0.0507447	FALSE
169	H1	15.0	15	N2	FAM	STANDARD	FAM	NFQ-MGB	Amp	36.3874	35.9624	0.958155	1.05452			FALSE	28536.5	TRUE	3	29					39.7084	0.994257	-3.5331	91.8837	0.734267	0.0507447	FALSE
170	H2	15.0	15	N2	FAM	STANDARD	FAM	NFQ-MGB	Amp	36.738	35.9624	0.971418	1.05452			FALSE	28536.5	TRUE	3	27					39.7084	0.994257	-3.5331	91.8837	0.734267	0.0507447	FALSE
171	H3	15.0	15	N2	FAM	STANDARD	FAM	NFQ-MGB	Amp	34.7617	35.9624	0.963515	1.05452			FALSE	28536.5	TRUE	3	29					39.7084	0.994257	-3.5331	91.8837	0.734267	0.0507447	FALSE
145	G1	150.0	150	N2	FAM	STANDARD	FAM	NFQ-MGB	Amp	32.7282	32.3414	0.975898	0.39533			FALSE	28536.5	TRUE	3	27					39.7084	0.994257	-3.5331	91.8837	0.734267	0.0507447	FALSE
146	G2	150.0	150	N2	FAM	STANDARD	FAM	NFQ-MGB	Amp	32.3581	32.3414	0.977119	0.39533			FALSE	28536.5	TRUE	3	24					39.7084	0.994257	-3.5331	91.8837	0.734267	0.0507447	FALSE
147	G3	150.0	150	N2	FAM	STANDARD	FAM	NFQ-MGB	Amp	31.938	32.3414	0.982551	0.39533			FALSE	28536.5	TRUE	3	27					39.7084	0.994257	-3.5331	91.8837	0.734267	0.0507447	FALSE
121	F1	1500.0	1500	N2	FAM	STANDARD	FAM	NFQ-MGB	Amp	28.8795	28.8326	0.98159	0.12192			FALSE	28536.5	TRUE	3	21					39.7084	0.994257	-3.5331	91.8837	0.734267	0.0507447	FALSE
122	F2	1500.0	1500	N2	FAM	STANDARD	FAM	NFQ-MGB	Amp	28.9241	28.8326	0.977848	0.12192			FALSE	28536.5	TRUE	3	20					39.7084	0.994257	-3.5331	91.8837	0.734267	0.0507447	FALSE
123	F3	1500.0	1500	N2	FAM	STANDARD	FAM	NFQ-MGB	Amp	28.6942	28.8326	0.973469	0.12192			FALSE	28536.5	TRUE	3	21					39.7084	0.994257	-3.5331	91.8837	0.734267	0.0507447	FALSE
97	E1	15000.0	15000	N2	FAM	STANDARD	FAM	NFQ-MGB	Amp	25.7749	25.576	0.978978	0.241873			FALSE	28536.5	TRUE	3	20					39.7084	0.994257	-3.5331	91.8837	0.734267	0.0507447	FALSE
98	E2	15000.0	15000	N2	FAM	STANDARD	FAM	NFQ-MGB	Amp	25.6464	25.576	0.982591	0.241873			FALSE	28536.5	TRUE	3	16					39.7084	0.994257	-3.5331	91.8837	0.734267	0.0507447	FALSE
99	E3	15000.0	15000	N2	FAM	STANDARD	FAM	NFQ-MGB	Amp	25.3068	25.576	0.986266	0.241873			FALSE	28536.5	TRUE	3	16					39.7084	0.994257	-3.5331	91.8837	0.734267	0.0507447	FALSE
73	D1	150000.0	150000	N2	FAM	STANDARD	FAM	NFQ-MGB	Amp	21.8002	21.7296	0.984497	0.146648			FALSE	28536.5	TRUE	3	13					39.7084	0.994257	-3.5331	91.8837	0.734267	0.0507447	FALSE
74	D2	150000.0	150000	N2	FAM	STANDARD	FAM	NFQ-MGB	Amp	21.8277	21.7296	0.989912	0.146648			FALSE	28536.5	TRUE	3	16					39.7084	0.994257	-3.5331	91.8837	0.734267	0.0507447	FALSE
75	D3	150000.0	150000	N2	FAM	STANDARD	FAM	NFQ-MGB	Amp	21.561	21.7296	0.977343	0.146648			FALSE	28536.5	TRUE	3	14					39.7084	0.994257	-3.5331	91.8837	0.734267	0.0507447	FALSE
49	C1	1500000.0	1500000	N2	FAM	STANDARD	FAM	NFQ-MGB	Amp	18.1513	18.1511	0.965846	0.0228807			FALSE	28536.5	TRUE	3	12					39.7084	0.994257	-3.5331	91.8837	0.734267	0.0507447	FALSE
50	C2	1500000.0	1500000	N2	FAM	STANDARD	FAM	NFQ-MGB	Amp	18.1281	18.1511	0.968289	0.0228807			FALSE	28536.5	TRUE	3	11					39.7084	0.994257	-3.5331	91.8837	0.734267	0.0507447	FALSE
51	C3	1500000.0	1500000	N2	FAM	STANDARD	FAM	NFQ-MGB	Amp	18.1738	18.1511	0.970921	0.0228807			FALSE	28536.5	TRUE	3	11					39.7084	0.994257	-3.5331	91.8837	0.734267	0.0507447	FALSE
25	B1	1.5E7	15000000	N2	FAM	STANDARD	FAM	NFQ-MGB	Amp	13.7497	13.9967	0.85014	0.259145			FALSE	28536.5	TRUE	3	6					39.7084	0.994257	-3.5331	91.8837	0.734267	0.0507447	FALSE
26	B2	1.5E7	15000000	N2	FAM	STANDARD	FAM	NFQ-MGB	Amp	14.2665	13.9967	0.863407	0.259145			FALSE	28536.5	TRUE	3	8					39.7084	0.994257	-3.5331	91.8837	0.734267	0.0507447	FALSE
27	B3	1.5E7	15000000	N2	FAM	STANDARD	FAM	NFQ-MGB	Amp	13.974	13.9967	0.858199	0.259145			FALSE	28536.5	TRUE	3	9					39.7084	0.994257	-3.5331	91.8837	0.734267	0.0507447	FALSE
1	A1	1.5E8	150000000	N2	FAM	STANDARD	FAM	NFQ-MGB	Amp	10.0703	10.1623	0.770255	0.0906129			FALSE	28536.5	TRUE	3	5					39.7084	0.994257	-3.5331	91.8837	0.734267	0.0507447	FALSE
2	A2	1.5E8	150000000	N2	FAM	STANDARD	FAM	NFQ-MGB	Amp	10.2514	10.1623	0.777349	0.0906129			FALSE	28536.5	TRUE	3	5					39.7084	0.994257	-3.5331	91.8837	0.734267	0.0507447	FALSE
3	A3	1.5E8	150000000	N2	FAM	STANDARD	FAM	NFQ-MGB	Amp	10.1651	10.1623	0.771982	0.0906129			FALSE	28536.5	TRUE	3	5					39.7084	0.994257	-3.5331	91.8837	0.734267	0.0507447	FALSE
175	H7	Sample 08		N2	FAM	UNKNOWN	FAM	NFQ-MGB	No Amp	Undetermined		0				FALSE	28536.5	TRUE	3	39					39.7084	0.994257	-3.5331	91.8837	0.734267	0.0507447	FALSE		Sample 08	Lung	Female	1.M	6.2	100	150	1200	3	100	26	MADKV21
176	H8	Sample 08		N2	FAM	UNKNOWN	FAM	NFQ-MGB	No Amp	Undetermined		0				FALSE	28536.5	TRUE	3	39					39.7084	0.994257	-3.5331	91.8837	0.734267	0.0507447	FALSE
177	H9	Sample 08		N2	FAM	UNKNOWN	FAM	NFQ-MGB	No Amp	Undetermined		0				FALSE	28536.5	TRUE	3	39					39.7084	0.994257	-3.5331	91.8837	0.734267	0.0507447	FALSE
367	P7	Sample 16		N2	FAM	UNKNOWN	FAM	NFQ-MGB	No Amp	Undetermined		0				FALSE	28536.5	TRUE	3	39					39.7084	0.994257	-3.5331	91.8837	0.734267	0.0507447	FALSE		Sample 16	Lung	Female	2.M	1.9	100	150	1200	3	100	19	MADKV21
368	P8	Sample 16		N2	FAM	UNKNOWN	FAM	NFQ-MGB	No Amp	Undetermined		0				FALSE	28536.5	TRUE	3	39					39.7084	0.994257	-3.5331	91.8837	0.734267	0.0507447	FALSE
369	P9	Sample 16		N2	FAM	UNKNOWN	FAM	NFQ-MGB	No Amp	Undetermined		0				FALSE	28536.5	TRUE	3	39					39.7084	0.994257	-3.5331	91.8837	0.734267	0.0507447	FALSE
178	H10	Sample 24	2.20152	N2	FAM	UNKNOWN	FAM	NFQ-MGB	Inconclusive	38.4975	38.4975	0.554554				FALSE	28536.5	TRUE	3	28					39.7084	0.994257	-3.5331	91.8837	0.734267	0.0507447	FALSE		Sample 24	Lung	Female	3.M	2.2	100	150	1200	3	100	27	MADKV21
179	H11	Sample 24		N2	FAM	UNKNOWN	FAM	NFQ-MGB	No Amp	Undetermined	38.4975	0				FALSE	28536.5	TRUE	3	39					39.7084	0.994257	-3.5331	91.8837	0.734267	0.0507447	FALSE
180	H12	Sample 24		N2	FAM	UNKNOWN	FAM	NFQ-MGB	No Amp	Undetermined	38.4975	0				FALSE	28536.5	TRUE	3	39					39.7084	0.994257	-3.5331	91.8837	0.734267	0.0507447	FALSE
370	P10	Sample 32	5.99266e+06	N2	FAM	UNKNOWN	FAM	NFQ-MGB	Amp	15.7624	15.8563	0.964367	0.0892632	5.64325e+06	329760	FALSE	28536.5	TRUE	3	8					39.7084	0.994257	-3.5331	91.8837	0.734267	0.0507447	FALSE		Sample 32	Lung	Female	1.2	2.2	100	150	1200	3	100	23	MADKV21
371	P11	Sample 32	5.33749e+06	N2	FAM	UNKNOWN	FAM	NFQ-MGB	Amp	15.94	15.8563	0.964624	0.0892632	5.64325e+06	329760	FALSE	28536.5	TRUE	3	9					39.7084	0.994257	-3.5331	91.8837	0.734267	0.0507447	FALSE
372	P12	Sample 32	5.5996e+06	N2	FAM	UNKNOWN	FAM	NFQ-MGB	Amp	15.8665	15.8563	0.965984	0.0892632	5.64325e+06	329760	FALSE	28536.5	TRUE	3	10					39.7084	0.994257	-3.5331	91.8837	0.734267	0.0507447	FALSE
181	H13	Sample 40	6.32878e+06	N2	FAM	UNKNOWN	FAM	NFQ-MGB	Amp	15.6787	15.5867	0.95396	0.0823973	6.72618e+06	357050	FALSE	28536.5	TRUE	3	9					39.7084	0.994257	-3.5331	91.8837	0.734267	0.0507447	FALSE		Sample 40	Lung	Female	2.2	1.4	100	150	1200	3	100	13	MADKV21
182	H14	Sample 40	7.01996e+06	N2	FAM	UNKNOWN	FAM	NFQ-MGB	Amp	15.5196	15.5867	0.954894	0.0823973	6.72618e+06	357050	FALSE	28536.5	TRUE	3	8					39.7084	0.994257	-3.5331	91.8837	0.734267	0.0507447	FALSE
183	H15	Sample 40	6.82979e+06	N2	FAM	UNKNOWN	FAM	NFQ-MGB	Amp	15.5618	15.5867	0.949351	0.0823973	6.72618e+06	357050	FALSE	28536.5	TRUE	3	9					39.7084	0.994257	-3.5331	91.8837	0.734267	0.0507447	FALSE
373	P13	Sample 48	1.92855e+06	N2	FAM	UNKNOWN	FAM	NFQ-MGB	Amp	17.502	17.5306	0.972341	0.0272469	1.89325e+06	33661.9	FALSE	28536.5	TRUE	3	10					39.7084	0.994257	-3.5331	91.8837	0.734267	0.0507447	FALSE		Sample 48	Lung	Female	3.2	1.5	100	150	1200	3	100	35	MADKV21
374	P14	Sample 48	1.8897e+06	N2	FAM	UNKNOWN	FAM	NFQ-MGB	Amp	17.5333	17.5306	0.980233	0.0272469	1.89325e+06	33661.9	FALSE	28536.5	TRUE	3	9					39.7084	0.994257	-3.5331	91.8837	0.734267	0.0507447	FALSE
375	P15	Sample 48	1.86151e+06	N2	FAM	UNKNOWN	FAM	NFQ-MGB	Amp	17.5563	17.5306	0.969415	0.0272469	1.89325e+06	33661.9	FALSE	28536.5	TRUE	3	10					39.7084	0.994257	-3.5331	91.8837	0.734267	0.0507447	FALSE
184	H16	Sample 56	320726	N2	FAM	UNKNOWN	FAM	NFQ-MGB	Amp	20.2547	20.1332	0.980511	0.139097	348119	31964.3	FALSE	28536.5	TRUE	3	14					39.7084	0.994257	-3.5331	91.8837	0.734267	0.0507447	FALSE		Sample 56	Lung	Female	1.4	2.6	100	150	1200	3	100	22	MADKV21
185	H17	Sample 56	383238	N2	FAM	UNKNOWN	FAM	NFQ-MGB	Amp	19.9814	20.1332	0.981638	0.139097	348119	31964.3	FALSE	28536.5	TRUE	3	13					39.7084	0.994257	-3.5331	91.8837	0.734267	0.0507447	FALSE
186	H18	Sample 56	340394	N2	FAM	UNKNOWN	FAM	NFQ-MGB	Amp	20.1634	20.1332	0.973086	0.139097	348119	31964.3	FALSE	28536.5	TRUE	3	14					39.7084	0.994257	-3.5331	91.8837	0.734267	0.0507447	FALSE
376	P16	Sample 64	120414	N2	FAM	UNKNOWN	FAM	NFQ-MGB	Amp	21.7579	21.7255	0.98381	0.043451	123011	3507.52	FALSE	28536.5	TRUE	3	13					39.7084	0.994257	-3.5331	91.8837	0.734267	0.0507447	FALSE		Sample 64	Lung	Female	2.4	1.1	100	150	1200	3	100	33	MADKV21
377	P17	Sample 64	121617	N2	FAM	UNKNOWN	FAM	NFQ-MGB	Amp	21.7426	21.7255	0.990829	0.043451	123011	3507.52	FALSE	28536.5	TRUE	3	13					39.7084	0.994257	-3.5331	91.8837	0.734267	0.0507447	FALSE
378	P18	Sample 64	127001	N2	FAM	UNKNOWN	FAM	NFQ-MGB	Amp	21.6761	21.7255	0.976826	0.043451	123011	3507.52	FALSE	28536.5	TRUE	3	14					39.7084	0.994257	-3.5331	91.8837	0.734267	0.0507447	FALSE
187	H19	Sample 72	263646	N2	FAM	UNKNOWN	FAM	NFQ-MGB	Amp	20.5554	20.6312	0.987064	0.160347	251833	25516.3	FALSE	28536.5	TRUE	3	13					39.7084	0.994257	-3.5331	91.8837	0.734267	0.0507447	FALSE		Sample 72	Lung	Female	3.4	5	100	150	1200	3	100	34	MADKV21
188	H20	Sample 72	269302	N2	FAM	UNKNOWN	FAM	NFQ-MGB	Amp	20.5228	20.6312	0.976228	0.160347	251833	25516.3	FALSE	28536.5	TRUE	3	14					39.7084	0.994257	-3.5331	91.8837	0.734267	0.0507447	FALSE
189	H21	Sample 72	222551	N2	FAM	UNKNOWN	FAM	NFQ-MGB	Amp	20.8154	20.6312	0.973314	0.160347	251833	25516.3	FALSE	28536.5	TRUE	3	13					39.7084	0.994257	-3.5331	91.8837	0.734267	0.0507447	FALSE
379	P19	Sample 80	7714.64	N2	FAM	UNKNOWN	FAM	NFQ-MGB	Amp	25.9741	25.9061	0.976782	0.100904	8076.25	540.341	FALSE	28536.5	TRUE	3	19					39.7084	0.994257	-3.5331	91.8837	0.734267	0.0507447	FALSE		Sample 80	Lung	Female	2.7	2.3	100	150	1200	3	100	26	MADKV21
380	P20	Sample 80	7816.73	N2	FAM	UNKNOWN	FAM	NFQ-MGB	Amp	25.954	25.9061	0.983134	0.100904	8076.25	540.341	FALSE	28536.5	TRUE	3	15					39.7084	0.994257	-3.5331	91.8837	0.734267	0.0507447	FALSE
381	P21	Sample 80	8697.39	N2	FAM	UNKNOWN	FAM	NFQ-MGB	Amp	25.7901	25.9061	0.988048	0.100904	8076.25	540.341	FALSE	28536.5	TRUE	3	14					39.7084	0.994257	-3.5331	91.8837	0.734267	0.0507447	FALSE
190	H22	Sample 88	2085.19	N2	FAM	UNKNOWN	FAM	NFQ-MGB	Amp	27.9815	28.0342	0.978685	0.127344	2019.38	163.845	FALSE	28536.5	TRUE	3	20					39.7084	0.994257	-3.5331	91.8837	0.734267	0.0507447	FALSE		Sample 88	Lung	Female	3.7	0.5	100	150	1200	3	100	18	MADKV21
191	H23	Sample 88	1832.87	N2	FAM	UNKNOWN	FAM	NFQ-MGB	Amp	28.1794	28.0342	0.974265	0.127344	2019.38	163.845	FALSE	28536.5	TRUE	3	22					39.7084	0.994257	-3.5331	91.8837	0.734267	0.0507447	FALSE
192	H24	Sample 88	2140.1	N2	FAM	UNKNOWN	FAM	NFQ-MGB	Amp	27.9416	28.0342	0.980635	0.127344	2019.38	163.845	FALSE	28536.5	TRUE	3	21					39.7084	0.994257	-3.5331	91.8837	0.734267	0.0507447	FALSE
File Name	X:\Users\knollm\MICHAEL DAVIS\MADKV 39 40\MADKV40 20wk N2 TITER_Copy.eds
Comment
Operator	DEFAULT
Barcode
Instrument Type	QuantStudio™ 5 System
Block Type	384-Well Block
Instrument Name	Gale-Lab-QuantStudio
Instrument Serial Number	272532607
Heated Cover Serial Number
Block Serial Number	20525021
Run Start Date/Time	2022-10-21 03:43:13 PM PDT
Run End Date/Time	2022-10-21 05:17:28 PM PDT
Run Duration	94 minutes 14 seconds
Sample Volume	10.0
Cover Temperature	105.0
Passive Reference	ROX
PCR Stage/Step Number	Stage 2 Step 2
Quantification Cycle Method	CT
Analysis Date/Time	2022-10-24 02:43:49 PM PDT
Software Name and Version	Design & Analysis Software v2.5.1
Plugin Name and Version	Primary Analysis v1.6.0, Standard Curve v1.5.1
Exported On	2022-10-24 02:44:40 PM PDT
Well	Well Position	Sample	Quantity	Target	Dye	Task	Reporter	Quencher	Amp Status	Cq	Cq Mean	Cq Confidence	Cq SD	Quantity Mean	Quantity SD	Auto Threshold	Threshold	Auto Baseline	Baseline Start	Baseline End	Tm1	Tm2	Tm3	Tm4	Y-Intercept	R2	Slope	Efficiency	Standard Deviation	Standard Error	Omit	Sample	Tissue	Gender	Label	uL RNA for 200ng	uL cDNA	uL Sample input uL	Trizol/Chloroform total Volume	uL cDNA/well	uL RNA eluted	Tissue weight mg	MADKV40
169	H1	15.0	15	N2	FAM	STANDARD	FAM	NFQ-MGB	Inconclusive	36.5406	36.7706	0.936326	0.32537			FALSE	0.112124	TRUE	3	32					41.481	0.992706	-3.6204	88.8927	0.720569	0.0677203	FALSE
170	H2	15.0	15	N2	FAM	STANDARD	FAM	NFQ-MGB	No Amp	Undetermined	36.7706	0	0.32537			FALSE	0.112124	TRUE	3	39					41.481	0.992706	-3.6204	88.8927	0.720569	0.0677203	FALSE
171	H3	15.0	15	N2	FAM	STANDARD	FAM	NFQ-MGB	Inconclusive	37.0007	36.7706	0.945168	0.32537			FALSE	0.112124	TRUE	3	32					41.481	0.992706	-3.6204	88.8927	0.720569	0.0677203	FALSE
145	G1	150.0	150	N2	FAM	STANDARD	FAM	NFQ-MGB	Amp	33.7029	33.1521	0.96778	0.513267			FALSE	0.112124	TRUE	3	28					41.481	0.992706	-3.6204	88.8927	0.720569	0.0677203	FALSE
146	G2	150.0	150	N2	FAM	STANDARD	FAM	NFQ-MGB	Amp	32.6872	33.1521	0.972427	0.513267			FALSE	0.112124	TRUE	3	27					41.481	0.992706	-3.6204	88.8927	0.720569	0.0677203	FALSE
147	G3	150.0	150	N2	FAM	STANDARD	FAM	NFQ-MGB	Amp	33.0662	33.1521	0.977555	0.513267			FALSE	0.112124	TRUE	3	29					41.481	0.992706	-3.6204	88.8927	0.720569	0.0677203	FALSE
121	F1	1500.0	1500	N2	FAM	STANDARD	FAM	NFQ-MGB	Amp	30.2255	29.9551	0.980549	0.255984			FALSE	0.112124	TRUE	3	26					41.481	0.992706	-3.6204	88.8927	0.720569	0.0677203	FALSE
122	F2	1500.0	1500	N2	FAM	STANDARD	FAM	NFQ-MGB	Amp	29.9233	29.9551	0.978901	0.255984			FALSE	0.112124	TRUE	3	26					41.481	0.992706	-3.6204	88.8927	0.720569	0.0677203	FALSE
123	F3	1500.0	1500	N2	FAM	STANDARD	FAM	NFQ-MGB	Amp	29.7165	29.9551	0.970936	0.255984			FALSE	0.112124	TRUE	3	25					41.481	0.992706	-3.6204	88.8927	0.720569	0.0677203	FALSE
97	E1	15000.0	15000	N2	FAM	STANDARD	FAM	NFQ-MGB	Amp	26.8471	26.8529	0.971501	0.124032			FALSE	0.112124	TRUE	3	22					41.481	0.992706	-3.6204	88.8927	0.720569	0.0677203	FALSE
98	E2	15000.0	15000	N2	FAM	STANDARD	FAM	NFQ-MGB	Amp	26.9797	26.8529	0.988769	0.124032			FALSE	0.112124	TRUE	3	23					41.481	0.992706	-3.6204	88.8927	0.720569	0.0677203	FALSE
99	E3	15000.0	15000	N2	FAM	STANDARD	FAM	NFQ-MGB	Amp	26.7319	26.8529	0.983974	0.124032			FALSE	0.112124	TRUE	3	22					41.481	0.992706	-3.6204	88.8927	0.720569	0.0677203	FALSE
73	D1	150000.0	150000	N2	FAM	STANDARD	FAM	NFQ-MGB	Amp	24.2708	24.2229	0.976267	0.237962			FALSE	0.112124	TRUE	3	19					41.481	0.992706	-3.6204	88.8927	0.720569	0.0677203	FALSE
74	D2	150000.0	150000	N2	FAM	STANDARD	FAM	NFQ-MGB	Amp	24.4332	24.2229	0.981343	0.237962			FALSE	0.112124	TRUE	3	20					41.481	0.992706	-3.6204	88.8927	0.720569	0.0677203	FALSE
75	D3	150000.0	150000	N2	FAM	STANDARD	FAM	NFQ-MGB	Amp	23.9646	24.2229	0.980534	0.237962			FALSE	0.112124	TRUE	3	19					41.481	0.992706	-3.6204	88.8927	0.720569	0.0677203	FALSE
49	C1	1500000.0	1500000	N2	FAM	STANDARD	FAM	NFQ-MGB	Amp	18.6975	18.6715	0.888752	0.0727175			FALSE	0.112124	TRUE	3	14					41.481	0.992706	-3.6204	88.8927	0.720569	0.0677203	FALSE
50	C2	1500000.0	1500000	N2	FAM	STANDARD	FAM	NFQ-MGB	Amp	18.7276	18.6715	0.901817	0.0727175			FALSE	0.112124	TRUE	3	13					41.481	0.992706	-3.6204	88.8927	0.720569	0.0677203	FALSE
51	C3	1500000.0	1500000	N2	FAM	STANDARD	FAM	NFQ-MGB	Amp	18.5894	18.6715	0.916336	0.0727175			FALSE	0.112124	TRUE	3	15					41.481	0.992706	-3.6204	88.8927	0.720569	0.0677203	FALSE
25	B1	1.5E7	15000000	N2	FAM	STANDARD	FAM	NFQ-MGB	Amp	15.004	14.9458	0.802803	0.0542028			FALSE	0.112124	TRUE	3	10					41.481	0.992706	-3.6204	88.8927	0.720569	0.0677203	FALSE
26	B2	1.5E7	15000000	N2	FAM	STANDARD	FAM	NFQ-MGB	Amp	14.9367	14.9458	0.831019	0.0542028			FALSE	0.112124	TRUE	3	11					41.481	0.992706	-3.6204	88.8927	0.720569	0.0677203	FALSE
27	B3	1.5E7	15000000	N2	FAM	STANDARD	FAM	NFQ-MGB	Amp	14.8967	14.9458	0.82772	0.0542028			FALSE	0.112124	TRUE	3	9					41.481	0.992706	-3.6204	88.8927	0.720569	0.0677203	FALSE
1	A1	1.5E8	150000000	N2	FAM	STANDARD	FAM	NFQ-MGB	Amp	11.6019	11.6931	0.763115	0.0916588			FALSE	0.112124	TRUE	3	8					41.481	0.992706	-3.6204	88.8927	0.720569	0.0677203	FALSE
2	A2	1.5E8	150000000	N2	FAM	STANDARD	FAM	NFQ-MGB	Amp	11.6923	11.6931	0.76609	0.0916588			FALSE	0.112124	TRUE	3	8					41.481	0.992706	-3.6204	88.8927	0.720569	0.0677203	FALSE
3	A3	1.5E8	150000000	N2	FAM	STANDARD	FAM	NFQ-MGB	Amp	11.7852	11.6931	0.770653	0.0916588			FALSE	0.112124	TRUE	3	7					41.481	0.992706	-3.6204	88.8927	0.720569	0.0677203	FALSE
7	A7	Sample 1		N2	FAM	UNKNOWN	FAM	NFQ-MGB	No Amp	Undetermined		0				FALSE	0.112124	TRUE	3	39					41.481	0.992706	-3.6204	88.8927	0.720569	0.0677203	FALSE	Sample 1	Heart	Female	1M	1.13427	100	150	1200	3	100	44	MADKV40
8	A8	Sample 1		N2	FAM	UNKNOWN	FAM	NFQ-MGB	No Amp	Undetermined		0				FALSE	0.112124	TRUE	3	39					41.481	0.992706	-3.6204	88.8927	0.720569	0.0677203	FALSE
9	A9	Sample 1		N2	FAM	UNKNOWN	FAM	NFQ-MGB	No Amp	Undetermined		0				FALSE	0.112124	TRUE	3	39					41.481	0.992706	-3.6204	88.8927	0.720569	0.0677203	FALSE
31	B7	Sample 2		N2	FAM	UNKNOWN	FAM	NFQ-MGB	No Amp	Undetermined	38.3232	0				FALSE	0.112124	TRUE	3	39					41.481	0.992706	-3.6204	88.8927	0.720569	0.0677203	FALSE	Sample 2	Kidney	Female	1M	0.439777	100	150	1200	3	100	54	MADKV40
32	B8	Sample 2		N2	FAM	UNKNOWN	FAM	NFQ-MGB	No Amp	Undetermined	38.3232	0				FALSE	0.112124	TRUE	3	39					41.481	0.992706	-3.6204	88.8927	0.720569	0.0677203	FALSE
33	B9	Sample 2	7.451	N2	FAM	UNKNOWN	FAM	NFQ-MGB	Amp	38.3232	38.3232	0.626669				FALSE	0.112124	TRUE	3	34					41.481	0.992706	-3.6204	88.8927	0.720569	0.0677203	FALSE
55	C7	Sample 3	237.071	N2	FAM	UNKNOWN	FAM	NFQ-MGB	Amp	32.883	32.8474	0.981997	0.169589	243.449	26.6404	FALSE	0.112124	TRUE	3	29					41.481	0.992706	-3.6204	88.8927	0.720569	0.0677203	FALSE	Sample 3	Lung	Female	1M	3.41035	100	150	1200	3	100	16	MADKV40
56	C8	Sample 3	272.699	N2	FAM	UNKNOWN	FAM	NFQ-MGB	Amp	32.6628	32.8474	0.981238	0.169589	243.449	26.6404	FALSE	0.112124	TRUE	3	28					41.481	0.992706	-3.6204	88.8927	0.720569	0.0677203	FALSE
57	C9	Sample 3	220.576	N2	FAM	UNKNOWN	FAM	NFQ-MGB	Amp	32.9964	32.8474	0.97102	0.169589	243.449	26.6404	FALSE	0.112124	TRUE	3	28					41.481	0.992706	-3.6204	88.8927	0.720569	0.0677203	FALSE
79	D7	Sample 4		N2	FAM	UNKNOWN	FAM	NFQ-MGB	No Amp	Undetermined		0				FALSE	0.112124	TRUE	3	39					41.481	0.992706	-3.6204	88.8927	0.720569	0.0677203	FALSE	Sample 4	Spleen	Female	1M	0.522117	100	150	1200	3	100	19	MADKV40
80	D8	Sample 4		N2	FAM	UNKNOWN	FAM	NFQ-MGB	No Amp	Undetermined		0				FALSE	0.112124	TRUE	3	39					41.481	0.992706	-3.6204	88.8927	0.720569	0.0677203	FALSE
81	D9	Sample 4		N2	FAM	UNKNOWN	FAM	NFQ-MGB	No Amp	Undetermined		0				FALSE	0.112124	TRUE	3	39					41.481	0.992706	-3.6204	88.8927	0.720569	0.0677203	FALSE
103	E7	Sample 5		N2	FAM	UNKNOWN	FAM	NFQ-MGB	No Amp	Undetermined		0				FALSE	0.112124	TRUE	3	39					41.481	0.992706	-3.6204	88.8927	0.720569	0.0677203	FALSE	Sample 5	Heart	Male	1M	2.14696	100	150	1200	3	100	26	MADKV40
104	E8	Sample 5		N2	FAM	UNKNOWN	FAM	NFQ-MGB	No Amp	Undetermined		0				FALSE	0.112124	TRUE	3	39					41.481	0.992706	-3.6204	88.8927	0.720569	0.0677203	FALSE
105	E9	Sample 5		N2	FAM	UNKNOWN	FAM	NFQ-MGB	No Amp	Undetermined		0				FALSE	0.112124	TRUE	3	39					41.481	0.992706	-3.6204	88.8927	0.720569	0.0677203	FALSE
127	F7	Sample 6		N2	FAM	UNKNOWN	FAM	NFQ-MGB	No Amp	Undetermined		0				FALSE	0.112124	TRUE	3	39					41.481	0.992706	-3.6204	88.8927	0.720569	0.0677203	FALSE	Sample 6	Kidney	Male	1M	0.274502	100	150	1200	3	100	94	MADKV40
128	F8	Sample 6		N2	FAM	UNKNOWN	FAM	NFQ-MGB	No Amp	Undetermined		0				FALSE	0.112124	TRUE	3	39					41.481	0.992706	-3.6204	88.8927	0.720569	0.0677203	FALSE
129	F9	Sample 6		N2	FAM	UNKNOWN	FAM	NFQ-MGB	No Amp	Undetermined		0				FALSE	0.112124	TRUE	3	39					41.481	0.992706	-3.6204	88.8927	0.720569	0.0677203	FALSE
151	G7	Sample 7		N2	FAM	UNKNOWN	FAM	NFQ-MGB	No Amp	Undetermined	37.8755	0				FALSE	0.112124	TRUE	3	39					41.481	0.992706	-3.6204	88.8927	0.720569	0.0677203	FALSE	Sample 7	Lung	Male	1M	3.28149	100	150	1200	3	100	23	MADKV40
152	G8	Sample 7	9.90563	N2	FAM	UNKNOWN	FAM	NFQ-MGB	Inconclusive	37.8755	37.8755	0.892926				FALSE	0.112124	TRUE	3	33					41.481	0.992706	-3.6204	88.8927	0.720569	0.0677203	FALSE
153	G9	Sample 7		N2	FAM	UNKNOWN	FAM	NFQ-MGB	No Amp	Undetermined	37.8755	0				FALSE	0.112124	TRUE	3	39					41.481	0.992706	-3.6204	88.8927	0.720569	0.0677203	FALSE
175	H7	Sample 8		N2	FAM	UNKNOWN	FAM	NFQ-MGB	No Amp	Undetermined		0				FALSE	0.112124	TRUE	3	39					41.481	0.992706	-3.6204	88.8927	0.720569	0.0677203	FALSE	Sample 8	Spleen	Male	1M	0.579966	100	150	1200	3	100	25	MADKV40
176	H8	Sample 8		N2	FAM	UNKNOWN	FAM	NFQ-MGB	No Amp	Undetermined		0				FALSE	0.112124	TRUE	3	39					41.481	0.992706	-3.6204	88.8927	0.720569	0.0677203	FALSE
177	H9	Sample 8		N2	FAM	UNKNOWN	FAM	NFQ-MGB	No Amp	Undetermined		0				FALSE	0.112124	TRUE	3	39					41.481	0.992706	-3.6204	88.8927	0.720569	0.0677203	FALSE
199	I7	Sample 9	9.57889	N2	FAM	UNKNOWN	FAM	NFQ-MGB	Inconclusive	37.9282	37.802	0.909607	0.178496			FALSE	0.112124	TRUE	3	34					41.481	0.992706	-3.6204	88.8927	0.720569	0.0677203	FALSE	Sample 9	Heart	Female	2M	1.93836	100	150	1200	3	100	32	MADKV40
200	I8	Sample 9	11.2471	N2	FAM	UNKNOWN	FAM	NFQ-MGB	Inconclusive	37.6758	37.802	0.915483	0.178496			FALSE	0.112124	TRUE	3	33					41.481	0.992706	-3.6204	88.8927	0.720569	0.0677203	FALSE
201	I9	Sample 9		N2	FAM	UNKNOWN	FAM	NFQ-MGB	No Amp	Undetermined	37.802	0	0.178496			FALSE	0.112124	TRUE	3	39					41.481	0.992706	-3.6204	88.8927	0.720569	0.0677203	FALSE
223	J7	Sample 10		N2	FAM	UNKNOWN	FAM	NFQ-MGB	No Amp	Undetermined		0				FALSE	0.112124	TRUE	3	39					41.481	0.992706	-3.6204	88.8927	0.720569	0.0677203	FALSE	Sample 10	Kidney	Female	2M	0.502008	100	150	1200	3	100	44	MADKV40
224	J8	Sample 10		N2	FAM	UNKNOWN	FAM	NFQ-MGB	No Amp	Undetermined		0				FALSE	0.112124	TRUE	3	39					41.481	0.992706	-3.6204	88.8927	0.720569	0.0677203	FALSE
225	J9	Sample 10		N2	FAM	UNKNOWN	FAM	NFQ-MGB	No Amp	Undetermined		0				FALSE	0.112124	TRUE	3	39					41.481	0.992706	-3.6204	88.8927	0.720569	0.0677203	FALSE
247	K7	Sample 11		N2	FAM	UNKNOWN	FAM	NFQ-MGB	No Amp	Undetermined		0				FALSE	0.112124	TRUE	3	39					41.481	0.992706	-3.6204	88.8927	0.720569	0.0677203	FALSE	Sample 11	Lung	Female	2M	2.28833	100	150	1200	3	100	39	MADKV40
248	K8	Sample 11		N2	FAM	UNKNOWN	FAM	NFQ-MGB	No Amp	Undetermined		0				FALSE	0.112124	TRUE	3	39					41.481	0.992706	-3.6204	88.8927	0.720569	0.0677203	FALSE
249	K9	Sample 11		N2	FAM	UNKNOWN	FAM	NFQ-MGB	No Amp	Undetermined		0				FALSE	0.112124	TRUE	3	39					41.481	0.992706	-3.6204	88.8927	0.720569	0.0677203	FALSE
271	L7	Sample 12		N2	FAM	UNKNOWN	FAM	NFQ-MGB	No Amp	Undetermined		0				FALSE	0.112124	TRUE	3	39					41.481	0.992706	-3.6204	88.8927	0.720569	0.0677203	FALSE	Sample 12	Spleen	Female	2M	0.478428	100	150	1200	3	100	23	MADKV40
272	L8	Sample 12		N2	FAM	UNKNOWN	FAM	NFQ-MGB	No Amp	Undetermined		0				FALSE	0.112124	TRUE	3	39					41.481	0.992706	-3.6204	88.8927	0.720569	0.0677203	FALSE
273	L9	Sample 12		N2	FAM	UNKNOWN	FAM	NFQ-MGB	No Amp	Undetermined		0				FALSE	0.112124	TRUE	3	39					41.481	0.992706	-3.6204	88.8927	0.720569	0.0677203	FALSE
295	M7	Sample 13		N2	FAM	UNKNOWN	FAM	NFQ-MGB	No Amp	Undetermined		0				FALSE	0.112124	TRUE	3	39					41.481	0.992706	-3.6204	88.8927	0.720569	0.0677203	FALSE	Sample 13	Heart	Male	2M	1.03252	100	150	1200	3	100	45	MADKV40
296	M8	Sample 13		N2	FAM	UNKNOWN	FAM	NFQ-MGB	No Amp	Undetermined		0				FALSE	0.112124	TRUE	3	39					41.481	0.992706	-3.6204	88.8927	0.720569	0.0677203	FALSE
297	M9	Sample 13		N2	FAM	UNKNOWN	FAM	NFQ-MGB	No Amp	Undetermined		0				FALSE	0.112124	TRUE	3	39					41.481	0.992706	-3.6204	88.8927	0.720569	0.0677203	FALSE
319	N7	Sample 14		N2	FAM	UNKNOWN	FAM	NFQ-MGB	No Amp	Undetermined		0				FALSE	0.112124	TRUE	3	39					41.481	0.992706	-3.6204	88.8927	0.720569	0.0677203	FALSE	Sample 14	Kidney	Male	2M	0.301049	100	150	1200	3	100	68	MADKV40
320	N8	Sample 14		N2	FAM	UNKNOWN	FAM	NFQ-MGB	No Amp	Undetermined		0				FALSE	0.112124	TRUE	3	39					41.481	0.992706	-3.6204	88.8927	0.720569	0.0677203	FALSE
321	N9	Sample 14		N2	FAM	UNKNOWN	FAM	NFQ-MGB	No Amp	Undetermined		0				FALSE	0.112124	TRUE	3	39					41.481	0.992706	-3.6204	88.8927	0.720569	0.0677203	FALSE
343	O7	Sample 15		N2	FAM	UNKNOWN	FAM	NFQ-MGB	No Amp	Undetermined		0				FALSE	0.112124	TRUE	3	39					41.481	0.992706	-3.6204	88.8927	0.720569	0.0677203	FALSE	Sample 15	Lung	Male	2M	1.77551	100	150	1200	3	100	30	MADKV40
344	O8	Sample 15		N2	FAM	UNKNOWN	FAM	NFQ-MGB	No Amp	Undetermined		0				FALSE	0.112124	TRUE	3	39					41.481	0.992706	-3.6204	88.8927	0.720569	0.0677203	FALSE
345	O9	Sample 15		N2	FAM	UNKNOWN	FAM	NFQ-MGB	No Amp	Undetermined		0				FALSE	0.112124	TRUE	3	39					41.481	0.992706	-3.6204	88.8927	0.720569	0.0677203	FALSE
367	P7	Sample 16		N2	FAM	UNKNOWN	FAM	NFQ-MGB	No Amp	Undetermined		0				FALSE	0.112124	TRUE	3	39					41.481	0.992706	-3.6204	88.8927	0.720569	0.0677203	FALSE	Sample 16	Spleen	Male	2M	0.581152	100	150	1200	3	100	12	MADKV40
368	P8	Sample 16		N2	FAM	UNKNOWN	FAM	NFQ-MGB	No Amp	Undetermined		0				FALSE	0.112124	TRUE	3	39					41.481	0.992706	-3.6204	88.8927	0.720569	0.0677203	FALSE
369	P9	Sample 16		N2	FAM	UNKNOWN	FAM	NFQ-MGB	No Amp	Undetermined		0				FALSE	0.112124	TRUE	3	39					41.481	0.992706	-3.6204	88.8927	0.720569	0.0677203	FALSE
10	A10	Sample 17		N2	FAM	UNKNOWN	FAM	NFQ-MGB	No Amp	Undetermined		0				FALSE	0.112124	TRUE	3	39					41.481	0.992706	-3.6204	88.8927	0.720569	0.0677203	FALSE	Sample 17	Heart	Female	3M	2.12472	100	150	1200	3	100	27	MADKV40
11	A11	Sample 17		N2	FAM	UNKNOWN	FAM	NFQ-MGB	No Amp	Undetermined		0				FALSE	0.112124	TRUE	3	39					41.481	0.992706	-3.6204	88.8927	0.720569	0.0677203	FALSE
12	A12	Sample 17		N2	FAM	UNKNOWN	FAM	NFQ-MGB	No Amp	Undetermined		0				FALSE	0.112124	TRUE	3	39					41.481	0.992706	-3.6204	88.8927	0.720569	0.0677203	FALSE
34	B10	Sample 18		N2	FAM	UNKNOWN	FAM	NFQ-MGB	No Amp	Undetermined		0				FALSE	0.112124	TRUE	3	39					41.481	0.992706	-3.6204	88.8927	0.720569	0.0677203	FALSE	Sample 18	Kidney	Female	3M	0.69351	100	150	1200	3	100	31	MADKV40
35	B11	Sample 18		N2	FAM	UNKNOWN	FAM	NFQ-MGB	No Amp	Undetermined		0				FALSE	0.112124	TRUE	3	39					41.481	0.992706	-3.6204	88.8927	0.720569	0.0677203	FALSE
36	B12	Sample 18		N2	FAM	UNKNOWN	FAM	NFQ-MGB	No Amp	Undetermined		0				FALSE	0.112124	TRUE	3	39					41.481	0.992706	-3.6204	88.8927	0.720569	0.0677203	FALSE
58	C10	Sample 19		N2	FAM	UNKNOWN	FAM	NFQ-MGB	No Amp	Undetermined		0				FALSE	0.112124	TRUE	3	39					41.481	0.992706	-3.6204	88.8927	0.720569	0.0677203	FALSE	Sample 19	Lung	Female	3M	1.67147	100	150	1200	3	100	38	MADKV40
59	C11	Sample 19		N2	FAM	UNKNOWN	FAM	NFQ-MGB	No Amp	Undetermined		0				FALSE	0.112124	TRUE	3	39					41.481	0.992706	-3.6204	88.8927	0.720569	0.0677203	FALSE
60	C12	Sample 19		N2	FAM	UNKNOWN	FAM	NFQ-MGB	No Amp	Undetermined		0				FALSE	0.112124	TRUE	3	39					41.481	0.992706	-3.6204	88.8927	0.720569	0.0677203	FALSE
82	D10	Sample 20		N2	FAM	UNKNOWN	FAM	NFQ-MGB	No Amp	Undetermined		0				FALSE	0.112124	TRUE	3	39					41.481	0.992706	-3.6204	88.8927	0.720569	0.0677203	FALSE	Sample 20	Spleen	Female	3M	0.690331	100	150	1200	3	100	16	MADKV40
83	D11	Sample 20		N2	FAM	UNKNOWN	FAM	NFQ-MGB	No Amp	Undetermined		0				FALSE	0.112124	TRUE	3	39					41.481	0.992706	-3.6204	88.8927	0.720569	0.0677203	FALSE
84	D12	Sample 20		N2	FAM	UNKNOWN	FAM	NFQ-MGB	No Amp	Undetermined		0				FALSE	0.112124	TRUE	3	39					41.481	0.992706	-3.6204	88.8927	0.720569	0.0677203	FALSE
106	E10	Sample 21		N2	FAM	UNKNOWN	FAM	NFQ-MGB	No Amp	Undetermined		0				FALSE	0.112124	TRUE	3	39					41.481	0.992706	-3.6204	88.8927	0.720569	0.0677203	FALSE	Sample 21	Heart	Male	3M	1.05685	100	150	1200	3	100	48	MADKV40
107	E11	Sample 21		N2	FAM	UNKNOWN	FAM	NFQ-MGB	No Amp	Undetermined		0				FALSE	0.112124	TRUE	3	39					41.481	0.992706	-3.6204	88.8927	0.720569	0.0677203	FALSE
108	E12	Sample 21		N2	FAM	UNKNOWN	FAM	NFQ-MGB	No Amp	Undetermined		0				FALSE	0.112124	TRUE	3	39					41.481	0.992706	-3.6204	88.8927	0.720569	0.0677203	FALSE
130	F10	Sample 22		N2	FAM	UNKNOWN	FAM	NFQ-MGB	No Amp	Undetermined		0				FALSE	0.112124	TRUE	3	39					41.481	0.992706	-3.6204	88.8927	0.720569	0.0677203	FALSE	Sample 22	Kidney	Male	3M	0.643965	100	150	1200	3	100	57	MADKV40
131	F11	Sample 22		N2	FAM	UNKNOWN	FAM	NFQ-MGB	No Amp	Undetermined		0				FALSE	0.112124	TRUE	3	39					41.481	0.992706	-3.6204	88.8927	0.720569	0.0677203	FALSE
132	F12	Sample 22		N2	FAM	UNKNOWN	FAM	NFQ-MGB	No Amp	Undetermined		0				FALSE	0.112124	TRUE	3	39					41.481	0.992706	-3.6204	88.8927	0.720569	0.0677203	FALSE
154	G10	Sample 23		N2	FAM	UNKNOWN	FAM	NFQ-MGB	No Amp	Undetermined		0				FALSE	0.112124	TRUE	3	39					41.481	0.992706	-3.6204	88.8927	0.720569	0.0677203	FALSE	Sample 23	Lung	Male	3M	0.84731	100	150	1200	3	100	34	MADKV40
155	G11	Sample 23		N2	FAM	UNKNOWN	FAM	NFQ-MGB	No Amp	Undetermined		0				FALSE	0.112124	TRUE	3	39					41.481	0.992706	-3.6204	88.8927	0.720569	0.0677203	FALSE
156	G12	Sample 23		N2	FAM	UNKNOWN	FAM	NFQ-MGB	No Amp	Undetermined		0				FALSE	0.112124	TRUE	3	39					41.481	0.992706	-3.6204	88.8927	0.720569	0.0677203	FALSE
178	H10	Sample 24		N2	FAM	UNKNOWN	FAM	NFQ-MGB	No Amp	Undetermined	38.3421	0				FALSE	0.112124	TRUE	3	39					41.481	0.992706	-3.6204	88.8927	0.720569	0.0677203	FALSE	Sample 24	Spleen	Male	3M	2.18885	100	150	1200	3	100	28	MADKV40
179	H11	Sample 24		N2	FAM	UNKNOWN	FAM	NFQ-MGB	No Amp	Undetermined	38.3421	0				FALSE	0.112124	TRUE	3	39					41.481	0.992706	-3.6204	88.8927	0.720569	0.0677203	FALSE
180	H12	Sample 24	7.36233	N2	FAM	UNKNOWN	FAM	NFQ-MGB	Inconclusive	38.3421	38.3421	0.76409				FALSE	0.112124	TRUE	3	34					41.481	0.992706	-3.6204	88.8927	0.720569	0.0677203	FALSE
202	I10	Sample 25		N2	FAM	UNKNOWN	FAM	NFQ-MGB	No Amp	Undetermined	37.5591	0	1.14188			FALSE	0.112124	TRUE	3	39					41.481	0.992706	-3.6204	88.8927	0.720569	0.0677203	FALSE	Sample 25	Heart	Female	1.2	1.86865	100	150	1200	3	100	21	MADKV40
203	I11	Sample 25	20.2436	N2	FAM	UNKNOWN	FAM	NFQ-MGB	Inconclusive	36.7517	37.5591	0.933992	1.14188			FALSE	0.112124	TRUE	3	32					41.481	0.992706	-3.6204	88.8927	0.720569	0.0677203	FALSE
204	I12	Sample 25	7.24843	N2	FAM	UNKNOWN	FAM	NFQ-MGB	Inconclusive	38.3666	37.5591	0.730702	1.14188			FALSE	0.112124	TRUE	3	34					41.481	0.992706	-3.6204	88.8927	0.720569	0.0677203	FALSE
226	J10	Sample 26	8.93952	N2	FAM	UNKNOWN	FAM	NFQ-MGB	Inconclusive	38.0369	38.1571	0.918236	0.337452	8.40451	1.70264	FALSE	0.112124	TRUE	3	34					41.481	0.992706	-3.6204	88.8927	0.720569	0.0677203	FALSE	Sample 26	Kidney	Female	1.2	0.396888	100	150	1200	3	100	40	MADKV40
227	J11	Sample 26	9.77538	N2	FAM	UNKNOWN	FAM	NFQ-MGB	Inconclusive	37.8963	38.1571	0.905243	0.337452	8.40451	1.70264	FALSE	0.112124	TRUE	3	33					41.481	0.992706	-3.6204	88.8927	0.720569	0.0677203	FALSE
228	J12	Sample 26	6.49862	N2	FAM	UNKNOWN	FAM	NFQ-MGB	Inconclusive	38.5383	38.1571	0.478203	0.337452	8.40451	1.70264	FALSE	0.112124	TRUE	3	35					41.481	0.992706	-3.6204	88.8927	0.720569	0.0677203	FALSE
250	K10	Sample 27	1.70911e+07	N2	FAM	UNKNOWN	FAM	NFQ-MGB	Amp	15.2955	15.1924	0.871601	0.157223	1.83117e+07	1.87916e+06	FALSE	0.112124	TRUE	3	11					41.481	0.992706	-3.6204	88.8927	0.720569	0.0677203	FALSE	Sample 27	Lung	Female	1.2	1.68556	100	150	1200	3	100	20	MADKV40
251	K11	Sample 27	1.73683e+07	N2	FAM	UNKNOWN	FAM	NFQ-MGB	Amp	15.2702	15.1924	0.87379	0.157223	1.83117e+07	1.87916e+06	FALSE	0.112124	TRUE	3	11					41.481	0.992706	-3.6204	88.8927	0.720569	0.0677203	FALSE
252	K12	Sample 27	2.04757e+07	N2	FAM	UNKNOWN	FAM	NFQ-MGB	Amp	15.0114	15.1924	0.850812	0.157223	1.83117e+07	1.87916e+06	FALSE	0.112124	TRUE	3	10					41.481	0.992706	-3.6204	88.8927	0.720569	0.0677203	FALSE
274	L10	Sample 28	212.332	N2	FAM	UNKNOWN	FAM	NFQ-MGB	Amp	33.0563	32.9088	0.968189	0.136105	233.796	19.9697	FALSE	0.112124	TRUE	3	28					41.481	0.992706	-3.6204	88.8927	0.720569	0.0677203	FALSE	Sample 28	Spleen	Female	1.2	0.464814	100	150	1200	3	100	22	MADKV40
275	L11	Sample 28	237.229	N2	FAM	UNKNOWN	FAM	NFQ-MGB	Amp	32.8819	32.9088	0.979395	0.136105	233.796	19.9697	FALSE	0.112124	TRUE	3	29					41.481	0.992706	-3.6204	88.8927	0.720569	0.0677203	FALSE
276	L12	Sample 28	251.826	N2	FAM	UNKNOWN	FAM	NFQ-MGB	Amp	32.7881	32.9088	0.965218	0.136105	233.796	19.9697	FALSE	0.112124	TRUE	3	29					41.481	0.992706	-3.6204	88.8927	0.720569	0.0677203	FALSE
298	M10	Sample 29	26.5526	N2	FAM	UNKNOWN	FAM	NFQ-MGB	Amp	36.3252	37.2197	0.960689	1.26507			FALSE	0.112124	TRUE	3	31					41.481	0.992706	-3.6204	88.8927	0.720569	0.0677203	FALSE	Sample 29	Heart	Male	1.2	1.2853	100	150	1200	3	100	36	MADKV40
299	M11	Sample 29	8.51022	N2	FAM	UNKNOWN	FAM	NFQ-MGB	Inconclusive	38.1142	37.2197	0.880927	1.26507			FALSE	0.112124	TRUE	3	34					41.481	0.992706	-3.6204	88.8927	0.720569	0.0677203	FALSE
300	M12	Sample 29		N2	FAM	UNKNOWN	FAM	NFQ-MGB	No Amp	Undetermined	37.2197	0	1.26507			FALSE	0.112124	TRUE	3	39					41.481	0.992706	-3.6204	88.8927	0.720569	0.0677203	FALSE
322	N10	Sample 30	21.6385	N2	FAM	UNKNOWN	FAM	NFQ-MGB	Inconclusive	36.6469	37.1343	0.949359	0.559555	16.523	5.46782	FALSE	0.112124	TRUE	3	33					41.481	0.992706	-3.6204	88.8927	0.720569	0.0677203	FALSE	Sample 30	Kidney	Male	1.2	0.483751	100	150	1200	3	100	41	MADKV40
323	N11	Sample 30	17.17	N2	FAM	UNKNOWN	FAM	NFQ-MGB	Inconclusive	37.0106	37.1343	0.937348	0.559555	16.523	5.46782	FALSE	0.112124	TRUE	3	32					41.481	0.992706	-3.6204	88.8927	0.720569	0.0677203	FALSE
324	N12	Sample 30	10.7605	N2	FAM	UNKNOWN	FAM	NFQ-MGB	Inconclusive	37.7454	37.1343	0.947626	0.559555	16.523	5.46782	FALSE	0.112124	TRUE	3	34					41.481	0.992706	-3.6204	88.8927	0.720569	0.0677203	FALSE
346	O10	Sample 31	3.8373e+07	N2	FAM	UNKNOWN	FAM	NFQ-MGB	Amp	14.0238	13.9918	0.842039	0.0447624	3.91732e+07	1.12339e+06	FALSE	0.112124	TRUE	3	10					41.481	0.992706	-3.6204	88.8927	0.720569	0.0677203	FALSE	Sample 31	Lung	Male	1.2	2.14839	100	150	1200	3	100	22	MADKV40
347	O11	Sample 31	3.86891e+07	N2	FAM	UNKNOWN	FAM	NFQ-MGB	Amp	14.0109	13.9918	0.851635	0.0447624	3.91732e+07	1.12339e+06	FALSE	0.112124	TRUE	3	9					41.481	0.992706	-3.6204	88.8927	0.720569	0.0677203	FALSE
348	O12	Sample 31	4.04574e+07	N2	FAM	UNKNOWN	FAM	NFQ-MGB	Amp	13.9406	13.9918	0.841965	0.0447624	3.91732e+07	1.12339e+06	FALSE	0.112124	TRUE	3	9					41.481	0.992706	-3.6204	88.8927	0.720569	0.0677203	FALSE
370	P10	Sample 32	225.904	N2	FAM	UNKNOWN	FAM	NFQ-MGB	Amp	32.9589	32.6084	0.978312	0.394997	288.417	74.3518	FALSE	0.112124	TRUE	3	29					41.481	0.992706	-3.6204	88.8927	0.720569	0.0677203	FALSE	Sample 32	Spleen	Male	1.2	0.422351	100	150	1200	3	100	27	MADKV40
371	P11	Sample 32	268.71	N2	FAM	UNKNOWN	FAM	NFQ-MGB	Amp	32.686	32.6084	0.972092	0.394997	288.417	74.3518	FALSE	0.112124	TRUE	3	28					41.481	0.992706	-3.6204	88.8927	0.720569	0.0677203	FALSE
372	P12	Sample 32	370.637	N2	FAM	UNKNOWN	FAM	NFQ-MGB	Amp	32.1804	32.6084	0.975906	0.394997	288.417	74.3518	FALSE	0.112124	TRUE	3	28					41.481	0.992706	-3.6204	88.8927	0.720569	0.0677203	FALSE
13	A13	Sample 33	113.791	N2	FAM	UNKNOWN	FAM	NFQ-MGB	Amp	34.0371	34.5735	0.969108	0.469386	83.4437	26.4413	FALSE	0.112124	TRUE	3	29					41.481	0.992706	-3.6204	88.8927	0.720569	0.0677203	FALSE	Sample 33	Heart	Female	2.2	1.34219	100	150	1200	3	100	24	MADKV40
14	A14	Sample 33	71.1713	N2	FAM	UNKNOWN	FAM	NFQ-MGB	Amp	34.7749	34.5735	0.972501	0.469386	83.4437	26.4413	FALSE	0.112124	TRUE	3	30					41.481	0.992706	-3.6204	88.8927	0.720569	0.0677203	FALSE
15	A15	Sample 33	65.3687	N2	FAM	UNKNOWN	FAM	NFQ-MGB	Amp	34.9086	34.5735	0.966339	0.469386	83.4437	26.4413	FALSE	0.112124	TRUE	3	29					41.481	0.992706	-3.6204	88.8927	0.720569	0.0677203	FALSE
37	B13	Sample 34	32.9416	N2	FAM	UNKNOWN	FAM	NFQ-MGB	Amp	35.9862	37.1308	0.959507	1.61871			FALSE	0.112124	TRUE	3	31					41.481	0.992706	-3.6204	88.8927	0.720569	0.0677203	FALSE	Sample 34	Kidney	Female	2.2	0.356506	100	150	1200	3	100	51	MADKV40
38	B14	Sample 34	7.68135	N2	FAM	UNKNOWN	FAM	NFQ-MGB	Inconclusive	38.2754	37.1308	0.870212	1.61871			FALSE	0.112124	TRUE	3	34					41.481	0.992706	-3.6204	88.8927	0.720569	0.0677203	FALSE
39	B15	Sample 34		N2	FAM	UNKNOWN	FAM	NFQ-MGB	No Amp	Undetermined	37.1308	0	1.61871			FALSE	0.112124	TRUE	3	39					41.481	0.992706	-3.6204	88.8927	0.720569	0.0677203	FALSE
61	C13	Sample 35	1.14707e+07	N2	FAM	UNKNOWN	FAM	NFQ-MGB	Amp	15.9225	15.8669	0.877487	0.0486302	1.18867e+07	364635	FALSE	0.112124	TRUE	3	12					41.481	0.992706	-3.6204	88.8927	0.720569	0.0677203	FALSE	Sample 35	Lung	Female	2.2	1.94299	100	150	1200	3	100	19	MADKV40
62	C14	Sample 35	1.21508e+07	N2	FAM	UNKNOWN	FAM	NFQ-MGB	Amp	15.8319	15.8669	0.888846	0.0486302	1.18867e+07	364635	FALSE	0.112124	TRUE	3	12					41.481	0.992706	-3.6204	88.8927	0.720569	0.0677203	FALSE
63	C15	Sample 35	1.20387e+07	N2	FAM	UNKNOWN	FAM	NFQ-MGB	Amp	15.8465	15.8669	0.898345	0.0486302	1.18867e+07	364635	FALSE	0.112124	TRUE	3	12					41.481	0.992706	-3.6204	88.8927	0.720569	0.0677203	FALSE
85	D13	Sample 36	131.102	N2	FAM	UNKNOWN	FAM	NFQ-MGB	Amp	33.8144	33.8624	0.965223	0.16313	127.609	12.9432	FALSE	0.112124	TRUE	3	29					41.481	0.992706	-3.6204	88.8927	0.720569	0.0677203	FALSE	Sample 36	Spleen	Female	2.2	0.304603	100	150	1200	3	100	26	MADKV40
86	D14	Sample 36	138.448	N2	FAM	UNKNOWN	FAM	NFQ-MGB	Amp	33.7287	33.8624	0.954842	0.16313	127.609	12.9432	FALSE	0.112124	TRUE	3	29					41.481	0.992706	-3.6204	88.8927	0.720569	0.0677203	FALSE
87	D15	Sample 36	113.278	N2	FAM	UNKNOWN	FAM	NFQ-MGB	Amp	34.0442	33.8624	0.968556	0.16313	127.609	12.9432	FALSE	0.112124	TRUE	3	30					41.481	0.992706	-3.6204	88.8927	0.720569	0.0677203	FALSE
109	E13	Sample 37	45.9141	N2	FAM	UNKNOWN	FAM	NFQ-MGB	Amp	35.4641	34.5688	0.953787	0.777084	87.2538	35.9791	FALSE	0.112124	TRUE	3	31					41.481	0.992706	-3.6204	88.8927	0.720569	0.0677203	FALSE	Sample 37	Heart	Male	2.2	0.926887	100	150	1200	3	100	46	MADKV40
110	E14	Sample 37	111.497	N2	FAM	UNKNOWN	FAM	NFQ-MGB	Amp	34.0691	34.5688	0.946995	0.777084	87.2538	35.9791	FALSE	0.112124	TRUE	3	28					41.481	0.992706	-3.6204	88.8927	0.720569	0.0677203	FALSE
111	E15	Sample 37	104.35	N2	FAM	UNKNOWN	FAM	NFQ-MGB	Amp	34.1732	34.5688	0.970256	0.777084	87.2538	35.9791	FALSE	0.112124	TRUE	3	29					41.481	0.992706	-3.6204	88.8927	0.720569	0.0677203	FALSE
133	F13	Sample 38	4.53604	N2	FAM	UNKNOWN	FAM	NFQ-MGB	Inconclusive	39.1036	38.7639	0	0.480307			FALSE	0.112124	TRUE	3	34					41.481	0.992706	-3.6204	88.8927	0.720569	0.0677203	FALSE	Sample 38	Kidney	Male	2.2	0.507769	100	150	1200	3	100	37	MADKV40
134	F14	Sample 38		N2	FAM	UNKNOWN	FAM	NFQ-MGB	No Amp	Undetermined	38.7639	0	0.480307			FALSE	0.112124	TRUE	3	39					41.481	0.992706	-3.6204	88.8927	0.720569	0.0677203	FALSE
135	F15	Sample 38	6.98709	N2	FAM	UNKNOWN	FAM	NFQ-MGB	Inconclusive	38.4243	38.7639	0.671998	0.480307			FALSE	0.112124	TRUE	3	34					41.481	0.992706	-3.6204	88.8927	0.720569	0.0677203	FALSE
157	G13	Sample 39	3.53587e+07	N2	FAM	UNKNOWN	FAM	NFQ-MGB	Amp	14.1524	14.0737	0.830651	0.134147	3.72663e+07	3.25367e+06	FALSE	0.112124	TRUE	3	10					41.481	0.992706	-3.6204	88.8927	0.720569	0.0677203	FALSE	Sample 39	Lung	Male	2.2	2.13714	100	150	1200	3	100	25	MADKV40
158	G14	Sample 39	3.54171e+07	N2	FAM	UNKNOWN	FAM	NFQ-MGB	Amp	14.1498	14.0737	0.847759	0.134147	3.72663e+07	3.25367e+06	FALSE	0.112124	TRUE	3	10					41.481	0.992706	-3.6204	88.8927	0.720569	0.0677203	FALSE
159	G15	Sample 39	4.10232e+07	N2	FAM	UNKNOWN	FAM	NFQ-MGB	Amp	13.9188	14.0737	0.838468	0.134147	3.72663e+07	3.25367e+06	FALSE	0.112124	TRUE	3	9					41.481	0.992706	-3.6204	88.8927	0.720569	0.0677203	FALSE
181	H13	Sample 40	180.076	N2	FAM	UNKNOWN	FAM	NFQ-MGB	Amp	33.3153	33.5271	0.968443	0.441088	161.329	41.2775	FALSE	0.112124	TRUE	3	29					41.481	0.992706	-3.6204	88.8927	0.720569	0.0677203	FALSE	Sample 40	Spleen	Male	2.2	0.547148	100	150	1200	3	100	18	MADKV40
182	H14	Sample 40	114.005	N2	FAM	UNKNOWN	FAM	NFQ-MGB	Amp	34.0341	33.5271	0.966917	0.441088	161.329	41.2775	FALSE	0.112124	TRUE	3	29					41.481	0.992706	-3.6204	88.8927	0.720569	0.0677203	FALSE
183	H15	Sample 40	189.906	N2	FAM	UNKNOWN	FAM	NFQ-MGB	Amp	33.2318	33.5271	0.969558	0.441088	161.329	41.2775	FALSE	0.112124	TRUE	3	29					41.481	0.992706	-3.6204	88.8927	0.720569	0.0677203	FALSE
205	I13	Sample 41	9.08836	N2	FAM	UNKNOWN	FAM	NFQ-MGB	Inconclusive	38.0109	36.6632	0.906585	1.24381	25.7704	17.0751	FALSE	0.112124	TRUE	3	33					41.481	0.992706	-3.6204	88.8927	0.720569	0.0677203	FALSE	Sample 41	Heart	Female	3.2	3.93399	100	150	1200	3	100	10	MADKV40
206	I14	Sample 41	25.0099	N2	FAM	UNKNOWN	FAM	NFQ-MGB	Inconclusive	36.4193	36.6632	0.949858	1.24381	25.7704	17.0751	FALSE	0.112124	TRUE	3	32					41.481	0.992706	-3.6204	88.8927	0.720569	0.0677203	FALSE
207	I15	Sample 41	43.2131	N2	FAM	UNKNOWN	FAM	NFQ-MGB	Amp	35.5594	36.6632	0.952376	1.24381	25.7704	17.0751	FALSE	0.112124	TRUE	3	31					41.481	0.992706	-3.6204	88.8927	0.720569	0.0677203	FALSE
229	J13	Sample 42	8.91818	N2	FAM	UNKNOWN	FAM	NFQ-MGB	Inconclusive	38.0406	38.1148	0.910705	0.104913			FALSE	0.112124	TRUE	3	34					41.481	0.992706	-3.6204	88.8927	0.720569	0.0677203	FALSE	Sample 42	Kidney	Female	3.2	0.41971	100	150	1200	3	100	51	MADKV40
230	J14	Sample 42		N2	FAM	UNKNOWN	FAM	NFQ-MGB	No Amp	Undetermined	38.1148	0	0.104913			FALSE	0.112124	TRUE	3	39					41.481	0.992706	-3.6204	88.8927	0.720569	0.0677203	FALSE
231	J15	Sample 42	8.11512	N2	FAM	UNKNOWN	FAM	NFQ-MGB	Inconclusive	38.189	38.1148	0.877367	0.104913			FALSE	0.112124	TRUE	3	34					41.481	0.992706	-3.6204	88.8927	0.720569	0.0677203	FALSE
253	K13	Sample 43	2.48613e+07	N2	FAM	UNKNOWN	FAM	NFQ-MGB	Amp	14.7062	14.6461	0.863798	0.205703	2.59801e+07	3.47894e+06	FALSE	0.112124	TRUE	3	10					41.481	0.992706	-3.6204	88.8927	0.720569	0.0677203	FALSE	Sample 43	Lung	Female	3.2	1.49454	100	150	1200	3	100	24	MADKV40
254	K14	Sample 43	2.31982e+07	N2	FAM	UNKNOWN	FAM	NFQ-MGB	Amp	14.8151	14.6461	0.86679	0.205703	2.59801e+07	3.47894e+06	FALSE	0.112124	TRUE	3	11					41.481	0.992706	-3.6204	88.8927	0.720569	0.0677203	FALSE
255	K15	Sample 43	2.98808e+07	N2	FAM	UNKNOWN	FAM	NFQ-MGB	Amp	14.4171	14.6461	0.842387	0.205703	2.59801e+07	3.47894e+06	FALSE	0.112124	TRUE	3	10					41.481	0.992706	-3.6204	88.8927	0.720569	0.0677203	FALSE
277	L13	Sample 44	179.944	N2	FAM	UNKNOWN	FAM	NFQ-MGB	Amp	33.3165	33.3226	0.97528	0.0350415	179.274	3.98382	FALSE	0.112124	TRUE	3	28					41.481	0.992706	-3.6204	88.8927	0.720569	0.0677203	FALSE	Sample 44	Spleen	Female	3.2	0.460126	100	150	1200	3	100	22	MADKV40
278	L14	Sample 44	182.881	N2	FAM	UNKNOWN	FAM	NFQ-MGB	Amp	33.291	33.3226	0.976225	0.0350415	179.274	3.98382	FALSE	0.112124	TRUE	3	29					41.481	0.992706	-3.6204	88.8927	0.720569	0.0677203	FALSE
279	L15	Sample 44	174.998	N2	FAM	UNKNOWN	FAM	NFQ-MGB	Amp	33.3603	33.3226	0.969577	0.0350415	179.274	3.98382	FALSE	0.112124	TRUE	3	29					41.481	0.992706	-3.6204	88.8927	0.720569	0.0677203	FALSE
301	M13	Sample 45	80.4873	N2	FAM	UNKNOWN	FAM	NFQ-MGB	Amp	34.5815	35.3424	0.970994	0.663354	52.8245	24.0312	FALSE	0.112124	TRUE	3	30					41.481	0.992706	-3.6204	88.8927	0.720569	0.0677203	FALSE	Sample 45	Heart	Male	3.2	1.38621	100	150	1200	3	100	41	MADKV40
302	M14	Sample 45	40.8843	N2	FAM	UNKNOWN	FAM	NFQ-MGB	Amp	35.6465	35.3424	0.955243	0.663354	52.8245	24.0312	FALSE	0.112124	TRUE	3	32					41.481	0.992706	-3.6204	88.8927	0.720569	0.0677203	FALSE
303	M15	Sample 45	37.1019	N2	FAM	UNKNOWN	FAM	NFQ-MGB	Amp	35.7992	35.3424	0.959393	0.663354	52.8245	24.0312	FALSE	0.112124	TRUE	3	30					41.481	0.992706	-3.6204	88.8927	0.720569	0.0677203	FALSE
325	N13	Sample 46	3.99819	N2	FAM	UNKNOWN	FAM	NFQ-MGB	Inconclusive	39.302	38.866	0	0.648796	5.60274	2.49482	FALSE	0.112124	TRUE	3	35					41.481	0.992706	-3.6204	88.8927	0.720569	0.0677203	FALSE	Sample 46	Kidney	Male	3.2	0.453931	100	150	1200	3	100	43	MADKV40
326	N14	Sample 46	4.33301	N2	FAM	UNKNOWN	FAM	NFQ-MGB	Inconclusive	39.1756	38.866	0	0.648796	5.60274	2.49482	FALSE	0.112124	TRUE	3	34					41.481	0.992706	-3.6204	88.8927	0.720569	0.0677203	FALSE
327	N15	Sample 46	8.47701	N2	FAM	UNKNOWN	FAM	NFQ-MGB	Inconclusive	38.1204	38.866	0.912997	0.648796	5.60274	2.49482	FALSE	0.112124	TRUE	3	34					41.481	0.992706	-3.6204	88.8927	0.720569	0.0677203	FALSE
[truncated: 153 more rows]

## Sheet: CT for 2 yr R2G
File Name	/Volumes/Shared/Users/knollm/MICHAEL DAVIS/MK413 PAMP Ms RNA/MADKV23M N2 TITER_Copy.eds
[truncated: 793 more rows]
