# Supplementary material for: A C57BL/6 Mouse Model of SARS-CoV-2 Infection Recapitulates Age- and Sex-Based Differences in Human COVID-19 Disease and Recovery
Source: Vaccines (Basel). 2022 Dec 25;11(1):47. doi: 10.3390/vaccines11010047 (PMC9860616; doi:10.3390/vaccines11010047)
Supplement: Supplementary file 1 [file vaccines-11-00047-s001.zip › Supplemental Table S2.xlsx]

## Sheet: Sheet1
			Copies N2/mg tissue
			Lung				Heart				Kidney				Spleen				Liver				Stomach				Duodenum
	10 wk males	D2	9.35667e+09	5.88366e+09	1.72666e+09		3.54852e+06	334823															677497	168586	75228.5
		D4	2.61943e+07	7.83724e+06	1.21533e+07
		D7	533399	320392	109882
	10 wk females	D2	6.69779e+08	5.27497e+09	1.5954e+09		121274	50671.2	9008.8						1	252546	103990						64911	143717
		D4	4.83936e+07	6.38173e+07	1.76995e+08
		D7	345292	1.04751e+06	86404.2
	20 wk males	D2	6.98303e+09	9064093472	5.13867e+09				41812.1														239000	37102.4	42555.1			229933
		D4	1.55064e+08	2.14641e+08	9.01538e+07																				111654		613228
		D7	8.91435e+06	1.28039e+07																			125692
	20 wk females	D2	2.97404e+09	9.85521e+09	9.61652e+08		406107	110901	5.93769e+06							91110.6			226783	90411.1			581227
		D4	1.62293e+08	9.03659e+07	3.95032e+07		39207.4								304393									338583
		D7	3.60145e+06	5.98336e+06
	2 yr males	D2	7.24816e+09	2.65887e+09	6.49038e+09		190123	4.89451e+07	122872		4453.93				30011.7	27443	20866.2		71479.1	3.39472e+06	210822		108514	29667.5	1.48731e+06		1.49893e+06	12163.6	917294
		D4	454652709	2.36938e+08	6.13498e+08		7894.37		242083								15181.8				338439		18571.3	44233.6	39011.2
		D7	6.53165e+07	6.00519e+06			15395.7	9881.32															218487	14346.1
	2 yr females	D2	1.33162e+09	2.10356e+08	918266880		53717.8		38380.3										147932				4455.83	25076.3	5195.94
		D4	6.97584e+07	3.60575e+07	9.77821e+07		63595.5	6687.89	25817		5281.08		4392.85				28166.8		18283				7537.15	7244.14
		D7	4.54441e+06	2.85496e+06	2.31501e+06		2624.82
