# Supplementary material for: A C57BL/6 Mouse Model of SARS-CoV-2 Infection Recapitulates Age- and Sex-Based Differences in Human COVID-19 Disease and Recovery
Source: Vaccines (Basel). 2022 Dec 25;11(1):47. doi: 10.3390/vaccines11010047 (PMC9860616; doi:10.3390/vaccines11010047)
Supplement: Supplementary file 1 [file vaccines-11-00047-s001.zip › Supplemental Table S3.xlsx]

## Sheet: ISH for 10 wk MA10
Analysis of 10 wk old mice infected with 10^4 MA10
ACDBio RNAScope -- Intact Virus -- nCoV2019-S (catalog #848161, RED chromogen)
MA10 Virus -- 10 week old -- C57BL6/J mice
Infection Day	Animal #	% airspace involvement	# Bronchiole profiles scored	Bronchiole epithelial cell infection (Average)	Bronchiole epithelial cell infection (SD)	# Bronchioles with epithelial cell shedding (>10 shed cells/profile)	% bronchioles with shedding	Tracheal/major bronchi involvement	Mediastinal Lymph Node	Spleen	Heart
NA	Mock	0	21	0	0	0	0	0	NA	Negative	Negative		Bronchiole and Bronchi/Tracheal Scoring (per profile)
2	1.2	60	16	3.625	0.619139	3	0.1875	1	Focal +	Focal +	Negative		0 = No staining
2	2.2	35	18	2.77778	1.80051	3	0.166667	1	NA	Negative	Negative		1 = <25% of profile with strong cytoplasmic staining
2	3.2	35	13	0.846154	1.51911	1	0.0769231	0	NA	Negative	Negative		2 = 26-50% of profile with strong cytoplasmic staining
4	1.4	30	16	0	0	0	0	0	NA	Negative	Negative		3 = 50-75% of profile with strong cytoplasmic staining
4	2.4	25	12	0	0	1	0.0833333	0	NA	Negative	Negative		4 = >75% of profile with strong cytoplasmic staining
4	3.4	25	16	0	0	0	0	0	NA	Negative	Negative
6	1.6	10	18	0	0	0	0	0	NA	Negative	Negative
6	2.6	20	25	0	0	0	0	0	NA	Negative	Negative
6	3.6	20	21	0	0	0	0	0	NA	Negative	Negative
R2G Virus -- 10 week old --C57BL6/J mice
Infection Day	Animal #	% airspace involvement	# Bronchiole profiles scored	Bronchiole epithelial cell infection (Average)	Bronchiole epithelial cell infection (SD)	# Bronchioles with epithelial cell shedding (>10 shed cells/profile)	% bronchioles with shedding	Tracheal/major bronchi involvement	Mediastinal Lymph Node	Spleen
NA	B16 Male 1M	0	24	0	0	0	0	0	NA	Negative
NA	B16 Male 2M	0	33	0	0	0	0	0	NA	Negative
NA	B16 Male 3M	0	14	0	0	0	0	0	NA	Negative
NA	B16 Female 1M	0	11	0	0	0	0	0	NA	Negative
NA	B16 Female 2M	0	26	0	0	0	0	0	NA	Negative
NA	B16 Female 3M	0	48	0	0	0	0	0	NA	Negative
2	B16 Male 1.2	50	25	2.24	1.33167	16	0.64	1	Focal +	Negative
2	B16 Male 2.2	60	34	3.11765	1.20012	15	0.441176	1	NA	Negative
2	B16 Male 3.2	60	34	2.82353	1.4662	9	0.264706	1	Negative	Negative
2	B16 Female 1.2	25	30	2.6	1.13259	3	0.1	1	NA	Negative
2	B16 Female 2.2	30	30	2.8	1.15669	10	0.333333	1	Negative	Negative
2	B16 Female 3.2	60	40	2.3	1.28502	14	0.35	1	NA	Negative
4	B16 Male 1.4	25	26	0.153846	0.367946	0	0	0	Negative	Negative
4	B16 Male 2.4	5	46	0	0	0	0	0	NA	Negative
4	B16 Male 3.4	15	22	0	0	0	0	0	NA	Negative
4	B16 Female 1.4	20	17	0.0588235	0.242536	0	0	0	NA	Negative
4	B16 Female 2.4	30	24	0.125	0.337832	0	0	0	Negative	Negative
4	B16 Female 3.4	15	22	0.0909091	0.294245	0	0	0	Negative	Negative
7	B16 Male 1.7	<1	27	0	0	0	0	0	Negative	Negative
7	B16 Male 2.7	<1	37	0	0	0	0	0	NA	Negative
7	B16 Male 3.7	<1	53	0	0	0	0	0	Negative	Negative
7	B16 Female 1.7	<1	27	0	0	0	0	0	NA	Negative
7	B16 Female 2.7	<3	28	0	0	0	0	0	NA	Negative
7	B16 Female 3.7	<1	9	0	0	0	0	0	Negative	Negative

## Sheet: ISH for 10wk R2G
ACDBio RNAScope -- Intact Virus -- nCoV2019-S (catalog #848161, RED chromogen)
MA10 Virus -- 10 week old -- C57BL6/J mice
Infection Day	Animal #	% airspace involvement	# Bronchiole profiles scored	Bronchiole epithelial cell infection (Average)	Bronchiole epithelial cell infection (SD)	# Bronchioles with epithelial cell shedding (>10 shed cells/profile)	% bronchioles with shedding	Tracheal/major bronchi involvement	Mediastinal Lymph Node	Spleen	Heart
NA	Mock	0	21	0	0	0	0	0	NA	Negative	Negative		Bronchiole and Bronchi/Tracheal Scoring (per profile)
2	1.2	60	16	3.625	0.619139	3	0.1875	1	Focal +	Focal +	Negative		0 = No staining
2	2.2	35	18	2.77778	1.80051	3	0.166667	1	NA	Negative	Negative		1 = <25% of profile with strong cytoplasmic staining
2	3.2	35	13	0.846154	1.51911	1	0.0769231	0	NA	Negative	Negative		2 = 26-50% of profile with strong cytoplasmic staining
4	1.4	30	16	0	0	0	0	0	NA	Negative	Negative		3 = 50-75% of profile with strong cytoplasmic staining
4	2.4	25	12	0	0	1	0.0833333	0	NA	Negative	Negative		4 = >75% of profile with strong cytoplasmic staining
4	3.4	25	16	0	0	0	0	0	NA	Negative	Negative
6	1.6	10	18	0	0	0	0	0	NA	Negative	Negative
6	2.6	20	25	0	0	0	0	0	NA	Negative	Negative
6	3.6	20	21	0	0	0	0	0	NA	Negative	Negative
R2G Virus -- 10 week old --C57BL6/J mice
Infection Day	Animal #	% airspace involvement	# Bronchiole profiles scored	Bronchiole epithelial cell infection (Average)	Bronchiole epithelial cell infection (SD)	# Bronchioles with epithelial cell shedding (>10 shed cells/profile)	% bronchioles with shedding	Tracheal/major bronchi involvement	Mediastinal Lymph Node	Spleen
NA	B16 Male 1M	0	24	0	0	0	0	0	NA	Negative
NA	B16 Male 2M	0	33	0	0	0	0	0	NA	Negative
NA	B16 Male 3M	0	14	0	0	0	0	0	NA	Negative
NA	B16 Female 1M	0	11	0	0	0	0	0	NA	Negative
NA	B16 Female 2M	0	26	0	0	0	0	0	NA	Negative
NA	B16 Female 3M	0	48	0	0	0	0	0	NA	Negative
2	B16 Male 1.2	50	25	2.24	1.33167	16	0.64	1	Focal +	Negative
2	B16 Male 2.2	60	34	3.11765	1.20012	15	0.441176	1	NA	Negative
2	B16 Male 3.2	60	34	2.82353	1.4662	9	0.264706	1	Negative	Negative
2	B16 Female 1.2	25	30	2.6	1.13259	3	0.1	1	NA	Negative
2	B16 Female 2.2	30	30	2.8	1.15669	10	0.333333	1	Negative	Negative
2	B16 Female 3.2	60	40	2.3	1.28502	14	0.35	1	NA	Negative
4	B16 Male 1.4	25	26	0.153846	0.367946	0	0	0	Negative	Negative
4	B16 Male 2.4	5	46	0	0	0	0	0	NA	Negative
4	B16 Male 3.4	15	22	0	0	0	0	0	NA	Negative
4	B16 Female 1.4	20	17	0.0588235	0.242536	0	0	0	NA	Negative
4	B16 Female 2.4	30	24	0.125	0.337832	0	0	0	Negative	Negative
4	B16 Female 3.4	15	22	0.0909091	0.294245	0	0	0	Negative	Negative
7	B16 Male 1.7	<1	27	0	0	0	0	0	Negative	Negative
7	B16 Male 2.7	<1	37	0	0	0	0	0	NA	Negative
7	B16 Male 3.7	<1	53	0	0	0	0	0	Negative	Negative
7	B16 Female 1.7	<1	27	0	0	0	0	0	NA	Negative
7	B16 Female 2.7	<3	28	0	0	0	0	0	NA	Negative
7	B16 Female 3.7	<1	9	0	0	0	0	0	Negative	Negative

## Sheet: ISH for 20wk R2G
ACDBio RNAScope -- Intact Virus -- nCoV2019-S (catalog #848161, RED chromogen)
R2G Virus -- 20 week old --C57BL6/J mice
Infection Day	Animal #	% airspace involvement	# Bronchiole profiles scored	Bronchiole epithelial cell infection (Average)	Bronchiole epithelial cell infection (SD)	# Bronchioles with epithelial cell shedding (>10 shed cells/profile)	% bronchioles with shedding	Tracheal/major bronchi involvement	Mediastinal Lymph Node	Spleen
NA	B16 Male 1M	0	45	0	0	0	0	0	Negative	Negative
NA	B16 Male 2M	0	28	0	0	0	0	0	Negative	Negative
NA	B16 Male 3M	0	44	0	0	0	0	0	Negative	Negative (non-specific background staining)
NA	B16 Female 1M	0	41	0	0	0	0	0	Negative	Negative (non-specific background staining)
NA	B16 Female 2M	0	24	0	0	0	0	0	Negative	Negative
NA	B16 Female 3M	0	40	0	0	0	0	0	NA	Negative (non-specific background staining)
2	B16 Male 1.2	80	39	3.05128	1.16864	14	0.358974	1	Negative	Negative
2	B16 Male 2.2	60	37	2.59459	1.40356	8	0.216216	2	Negative	Negative
2	B16 Male 3.2	60	32	2.53125	1.2696	8	0.25	1	Negative	Negative
2	B16 Female 1.2	60	33	2.75758	1.50063	5	0.151515	1	NA	Negative
2	B16 Female 2.2	20	44	0.795455	0.904242	8	0.181818	0	Negative	Negative
2	B16 Female 3.2	10	45	0.222222	0.794552	2	0.0444444	1	Negative	Negative (non-specific background staining)
4	B16 Male 1.4	50	40	0.775	0.76753	1	0.025	0	Negative	Not available
4	B16 Male 2.4	40	34	0.0882353	0.287902	0	0	0	Focally positive? High background	Negative (non-specific background staining)
4	B16 Male 3.4	60	50	1.22	0.86402	4	0.08	1	NA	Negative (non-specific background staining)
4	B16 Female 1.4	80	37	2.13514	0.88701	6	0.162162	2	Negative	Negative (non-specific background staining)
4	B16 Female 2.4	70	52	2.09615	0.955061	8	0.153846	2	NA	Negative
4	B16 Female 3.4	60	52	1.05769	1.30479	7	0.134615	0	Positive? High non-specific signal	Positive? High non-specific signal
7	B16 Male 2.7	45	25	1.24	0.522813	0	0	1	Negative (non-specific background staining)	Negative (non-specific background staining)
7	B16 Male 3.7	20	45	0.466667	0.504525	0	0	0	NA	Negative (non-specific background staining)
7	B16 Female 2.7	10	23	0.652174	0.572768	1	0.0434783	0	NA	Negative (non-specific background staining)
7	B16 Female 3.7	30	38	0.526316	0.556866	1	0.0263158	0	Negative (non-specific background staining)	Negative (non-specific background staining)

## Sheet: ISH for 2yr R2G
ACDBio RNAScope -- Intact Virus -- nCoV2019-S (catalog #848161, RED chromogen)
R2G Virus -- 2 year old --C57BL6/J mice
Infection Day	Animal #	% airspace involvement	# Bronchiole profiles scored	Bronchiole epithelial cell infection (Average)	Bronchiole epithelial cell infection (SD)	# Bronchioles with epithelial cell shedding (>10 shed cells/profile)	% bronchioles with shedding	Tracheal/major bronchi involvement	Mediastinal Lymph Node	Spleen	Heart
NA	B16 Male 1M	0	36	0	0	0	0	0	Negative	Negative	Negative
NA	B16 Male 2M	0	26	0	0	0	0	0	Negative	Negative	Negative
NA	B16 Male 3M	0	35	0	0	0	0	0	Negative	Negative	Negative
NA	B16 Female 1M	0	31	0	0	0	0	0	Negative	Not available	Not available
NA	B16 Female 2M	0	32	0	0	0	0	0	Negative	Negative	Negative
NA	B16 Female 3M	0	59	0	0	0	0	0	Negative	Negative	Negative
2	B16 Male 1.2	80	57	3.36842	0.993399	22	0.385965	2	NA	Negative	Negative
2	B16 Male 2.2	80	58	2.84483	1.13635	24	0.413793	1	Negative	Negative	Negative
2	B16 Male 3.2	85	35	3.62857	0.645606	4	0.114286	1	Negative	Negative	Negative
2	B16 Female 1.2	45	48	1.16667	1.34217	7	0.145833	1	Focally positive	Negative	Negative
2	B16 Female 2.2	35	44	1.27273	1.24571	5	0.113636	1	Negative	Negative	Negative
2	B16 Female 3.2	55	55	1.96364	1.41374	16	0.290909	1	NA	Negative	Negative
4	B16 Male 1.4	70	44	1	0.681994	11	0.25	0	Negative	Not available	Negative
4	B16 Male 2.4	45	40	0.35	0.483046	2	0.05	0	Negative	Negative	Negative
4	B16 Male 3.4	80	37	1.10811	0.3148	9	0.243243	0	NA	Negative	Negative
4	B16 Female 1.4	5	47	0.425532	0.58028	1	0.0212766	0	Negative	Negative	Negative
4	B16 Female 2.4	20	45	0.355556	0.48409	1	0.0222222	0	Negative	Negative	Negative
4	B16 Female 3.4	30	38	0.684211	0.471069	7	0.184211	0	Negative	Negative	Negative
7	B16 Male 1.7	20	50	0.56	0.860944	3	0.06	0	Negative	Negative	Negative	Tumor is focally positive
7	B16 Male 2.7	<1	21	0.0952381	0.300793	0	0	0	Negative	Negative	Negative
7	B16 Female 1.7	<1	36	0	0	0	0	0	Negative	Negative	Negative
7	B16 Female 2.7	10	45	0.244444	0.434613	2	0.0444444	0	NA	Negative	Negative
7	B16 Female 3.7	15	47	0.148936	0.359875	0	0	0	Negative	Negative	Negative
5	B16 Female 1.5	45	26	1	0.282843	8	0.307692	0	Negative	Negative	Negative
6	B16 Male 1.6	35	34	0.617647	0.551291	4	0.117647	0	Negative	Negative	Negative
