# Supplementary material for: A C57BL/6 Mouse Model of SARS-CoV-2 Infection Recapitulates Age- and Sex-Based Differences in Human COVID-19 Disease and Recovery
Source: Vaccines (Basel). 2022 Dec 25;11(1):47. doi: 10.3390/vaccines11010047 (PMC9860616; doi:10.3390/vaccines11010047)
Supplement: Supplementary file 1 [file vaccines-11-00047-s001.zip › Supplemental Table S4.xlsx]

## Sheet: Bronchial  cell death
Purpose: measure apoptosis in bronchial epithelial cells												Scoring system
10 40X fields												0	0 apoptotic bodies per 40X field
												1	1-5 apoptotic bodies per 40X field
	field											2	6-10 apoptotic bodies per 40X field
Mouse	1	2	3	4	5	6	7	8	9	10	Mean	3	11-20 apoptotic bodies per 40X field
Mock-1	0	0	0	1	0	0	0	0	1	0	0.2	4	>20 apoptotic bodies per 40X field
1.2	2	0	1	1	1	1	3	1	1	3	1.4
2.2	4	4	1	1	3	1	0	0	4	3	2.1
3.2	0	0	0	3	2	2	0	0	0	3	1
1.4	1	0	1	0	1	1	0	0	1	0	0.5
2.4	1	0	0	1	0	1	1	0	1	1	0.6
3.4	1	1	0	1	0	0	1	0	0	0	0.4
1.6	1	0	1	1	1	1	2	1	1	1	1
2.6	1	1	0	0	1	1	0	1	1	1	0.7
3.6	1	1	0	1	0	1	0	1	0	1	0.6

## Sheet: peribronchial inflammation
Purpose: quantify peribronchial inflammation												Scoring system
10 40X fields												0	none
												1	0-25% circumference with >1 leukocyte cell layer
	field											2	26-50% circumference with >1 leukocyte cell layer
Mouse	1	2	3	4	5	6	7	8	9	10	Mean	3	50-100% circumference with >1 leukocyte cell layer
Mock-1	0	0	0	0	0	0	0	0	0	0	0
1.2	1	0	0	0	1	0	0	0	1	1	0.4
2.2	0	1	0	0	0	0	2	3	1	0	0.7
3.2	0	0	0	1	1	1	0	1	0	0	0.4
1.4	1	0	0	0	0	1	0	0	0	0	0.2
2.4	0	0	0	0	0	0	0	0	1	0	0.1
3.4	0	0	0	0	0	0	0	0	0	0	0
1.6	3	1	0	1	1	0	1	0	1	1	0.9
2.6	3	1	1	1	1	1	0	1	0	2	1.1
3.6	0	0	1	0	0	1	0	1	1	0	0.4

## Sheet: periarterial inflammation
Purpose: quantify periarterial inflammation												Scoring system
10 40X fields												0	none
												1	0-25% circumference with >1 leukocyte cell layer
	field											2	26-50% circumference with >1 leukocyte cell layer
Mouse	1	2	3	4	5	6	7	8	9	10	Mean	3	50-100% circumference with >1 leukocyte cell layer
Mock-1	0	0	0	0	0	0	0	0	0	0	0
1.2	0	0	0	0	0	0	0	0	0	0	0
2.2	0	1	0	0	0	0	0	0	0	0	0.1
3.2	0	0	0	0	0	0	0	0	0	0	0
1.4	0	0	0	0	0	1	0	0	0	1	0.2
2.4	0	0	0	0	1	0	0	0	0	0	0.1
3.4	0	0	0	0	0	0	0	0	0	0	0
1.6	0	0	0	1	0	1	0	0	0	1	0.3
2.6	1	3	2	1	1	0	0	1	2	0	1.1
3.6	1	1	2	0	2	1	3	0	2	0	1.2

## Sheet: endarteritis
Purpose: quantify endarterial inflammation												Scoring system
10 40X fields												0	none
												1	0-25% circumference with ≥1 leukocyte cell layer
	field											2	26-50% circumference with ≥1 leukocyte cell layer
Mouse	1	2	3	4	5	6	7	8	9	10	Mean	3	50-100% circumference with ≥1 leukocyte cell layer
Mock-1	0	0	0	0	0	0	0	0	0	0	0
1.2	2	3	1	3	1	1	1	3	0	2	1.7
2.2	0	2	3	3	2	1	3	3	0	0	1.7
3.2	1	3	3	2	0	0	0	0	1	1	1.1
1.4	3	1	0	2	1	1	0	1	0	1	1
2.4	1	1	1	3	1	1	0	0	0	0	0.8
3.4	0	1	2	1	1	1	1	2	2	0	1.1
1.6	0	1	0	1	1	1	1	0	1	1	0.7
2.6	0	1	3	1	0	0	1	0	0	3	0.9
3.6	1	0	1	0	1	2	0	0	1	0	0.6

## Sheet: venulitis
Purpose: quantify endovenular inflammation												Scoring system
10 40X fields												0	none
												1	0-25% circumference with >1 leukocyte cell layer
	field											2	26-50% circumference with >1 leukocyte cell layer
Mouse	1	2	3	4	5	6	7	8	9	10	Mean	3	50-100% circumference with >1 leukocyte cell layer
Mock-1	0	0	0	0	0	0	0	0	0	0	0
1.2	2	1	0	1	1	3	1	1	0	1	1.1
2.2	2	3	0	1	1	1	3	1	0	0	1.2
3.2	1	0	2	1	1	1	1	1	1	3	1.2
1.4	0	1	0	0	0	0	1	1	1	1	0.5
2.4	1	1	0	1	1	1	1	1	3	1	1.1
3.4	0	0	1	1	1	0	0	0	1	1	0.5
1.6	1	1	0	0	0	1	0	1	1	0	0.5
2.6	0	1	2	0	0	1	0	0	0	1	0.5
3.6	1	1	1	0	0	0	1	1	0	1	0.6

## Sheet: perivenule inflammation
Purpose: quantify perivenular inflammation												Scoring system
10 40X fields												0	none
												1	0-25% circumference with >1 leukocyte cell layer
	field											2	26-50% circumference with >1 leukocyte cell layer
Mouse	1	2	3	4	5	6	7	8	9	10	Mean	3	50-100% circumference with >1 leukocyte cell layer
Mock-1	0	0	0	0	0	0	0	0	0	0	0
1.2	0	0	1	0	1	1	1	0	1	0	0.5
2.2	1	0	0	1	2	0	0	0	1	0	0.5
3.2	1	1	0	0	0	0	0	0	0	0	0.2
1.4	1	1	1	3	1	2	3	1	3	1	1.7
2.4	0	1	2	1	2	1	1	1	2	1	1.2
3.4	1	1	3	3	1	3	0	1	3	2	1.8
1.6	1	2	3	0	1	0	3	3	3	2	1.8
2.6	2	1	2	1	3	3	3	2	3	2	2.2
3.6	3	2	1	3	2	3	3	2	1	2	2.2

## Sheet: interstitial lymphocytic pneum
Purpose: interstital (alveolar sepate) inflammation												Scoring system
10 10X fields												state percentage of pulmonary alveolar parenchyma with septae expanded by leukocyte
	Pathologist
Mouse	1	2	3	4	5	6	7	8	9	10	Mean
Mock-1	0	0	0	0	0	0	0	0	0	0	0
1.2	0.05	0.1	0	0.02	0	0	0	0.3	0	0	0.047
2.2	0.05	0.1	0	0	0	0.15	0.05	0.05	0	0	0.04
3.2	0.05	0	0	0.02	0.1	0.1	0.1	0.1	0.04	0.03	0.054
1.4	0.1	0.05	0	0	0.02	0	0.03	0.02	0.05	0.1	0.037
2.4	0.05	0.1	0.15	0.05	0	0.05	0.05	0.05	0	0	0.05
3.4	0.02	0.05	0.01	0	0.02	0.1	0.05	0	0.08	0	0.033
1.6	0.05	0.2	0.25	0.05	0.05	0.1	0.05	0.05	0.1	0.05	0.095
2.6	0.3	0.05	0.02	0.1	0.05	0.05	0.1	0.2	0.1	0.03	0.1
3.6	0.02	0.25	0.4	0.5	0.02	0	0	0.05	0.05	0.1	0.139

## Sheet: pulmonary edema
Purpose: interstital (alveolar sepate) inflammation												Scoring system
10 10X fields												state percentage of pulmonary alveolarairspaces filled with edema (eosinophilic material)
	Pathologist
Mouse	1	2	3	4	5	6	7	8	9	10	Mean
Mock-1	0	0	0	0	0	0	0	0	0	0	0
1.2	0	0	0	0	0	0	0	0	0	0	0
2.2	0	0	0	0	0	0	0	0	0	0	0
3.2	0	0	0	0	0	0	0	0	0	0	0
1.4	0	0	0.05	0	0	0.5	0.02	0.1	0	0	0.067
2.4	0.05	0.05	0	0	0	0	0	0	0	0	0.01
3.4	0	0	0	0.02	0	0	0	0	0	0	0.002
1.6	0	0	0	0.5	1	0.6	0.5	0.4	0.2	0	0.32
2.6	0	0.5	0.6	0.1	0.3	0.4	0.6	0	0	0	0.25
3.6	0.5	0.2	0.3	0.3	0.6	0	0	0.3	0.5	0.5	0.32
