# Supplementary material for: A C57BL/6 Mouse Model of SARS-CoV-2 Infection Recapitulates Age- and Sex-Based Differences in Human COVID-19 Disease and Recovery
Source: Vaccines (Basel). 2022 Dec 25;11(1):47. doi: 10.3390/vaccines11010047 (PMC9860616; doi:10.3390/vaccines11010047)
Supplement: Supplementary file 1 [file vaccines-11-00047-s001.zip › Supplemental Table S5.xlsx]

## Sheet: Bronchial  cell death
Purpose: measure apoptosis in bronchial epithelial cells												Scoring system
10 40X fields												0	0 apoptotic bodies per 40X field
												1	1-5 apoptotic bodies per 40X field
	field											2	6-10 apoptotic bodies per 40X field
Mouse	1	2	3	4	5	6	7	8	9	10	Mean	3	11-20 apoptotic bodies per 40X field
M1.2	3	4	4	0	3	0	2	0	2	4	2.2	4	>20 apoptotic bodies per 40X field
M2.2	1	3	2	2	4	2	1	4	1	3	2.3
M3.2	3	3	2	4	4	3	2	1	0	4	2.6
F1.2	3	3	1	1	3	3	4	4	1	1	2.4
F2.2	2	4	3	4	4	2	3	4	0	2	2.8
F3.2	4	4	4	1	0	4	4	4	3	3	3.1
M1.4	1	0	1	1	0	0	0	0	0	0	0.3
M2.4	1	1	1	1	0	1	0	0	1	0	0.6
M3.4	0	0	0	1	0	0	0	0	0	1	0.2
F1.4	0	0	0	1	0	1	0	0	0	0	0.2
F2.4	1	0	0	0	0	0	0	0	0	0	0.1
F3.4	1	1	0	0	0	0	0	0	0	0	0.2
M1.7	1	0	1	0	0	0	1	0	1	0	0.4
M2.7	1	0	1	0	1	0	0	0	0	1	0.4
M3.7	0	1	1	0	0	0	1	0	0	0	0.3
F3.7	0	0	0	0	0	0	0	0	1	0	0.1
F2.7	0	0	0	0	0	0	0	0	0	0	0
F1.7	1	0	0	0	1	0	0	1	1	0	0.4
M1M	0	0	0	0	0	0	0	0	0	0	0
M2M	0	0	0	0	0	0	0	0	0	0	0
M3M	0	0	0	0	0	0	0	0	0	0	0
F3M	0	0	0	0	1	0	0	0	0	0	0.1
F2M	0	0	0	0	0	0	0	0	0	1	0.1
F1M	0	0	0	0	0	0	0	0	0	0	0

## Sheet: peribronchial inflammation
Purpose: quantify peribronchial inflammation												Scoring system
10 40X fields												0	none
												1	0-25% circumference with >1 leukocyte cell layer
	field											2	26-50% circumference with >1 leukocyte cell layer
Mouse	1	2	3	4	5	6	7	8	9	10	Mean	3	50-100% circumference with >1 leukocyte cell layer
M1.2	0	0	1	1	1	1	0	0	1	1	0.6
M2.2	0	0	0	0	0	1	0	0	0	0	0.1
M3.2	0	0	0	0	0	0	0	0	0	1	0.1
F1.2	0	0	1	1	2	0	0	0	1	0	0.5
F2.2	1	0	0	2	0	0	0	0	0	0	0.3
F3.2	1	1	0	0	1	1	0	0	1	1	0.6
M1.4	0	0	0	0	0	1	0	0	0	0	0.1
M2.4	1	0	1	0	0	0	0	0	0	0	0.2
M3.4	1	1	0	0	1	2	0	0	0	1	0.6
F1.4	1	0	0	0	1	0	0	0	1	0	0.3
F2.4	0	1	0	0	1	0	0	0	1	0	0.3
F3.4	1	1	0	0	0	0	0	0	0	1	0.3
M1.7	1	1	1	1	2	2	1	3	2	1	1.5
M2.7	0	1	1	1	0	1	1	1	1	1	0.8
M3.7	2	2	1	1	1	1	1	0	0	1	1
F3.7	1	0	1	0	1	1	1	1	1	2	0.9
F2.7	1	1	0	1	0	1	1	1	1	1	0.8
F1.7	0	1	0	2	1	0	1	2	1	2	1
M1M	0	0	0	0	0	0	0	0	1	0	0.1
M2M	0	0	0	0	0	0	0	0	0	0	0
M3M	0	0	0	0	0	0	0	0	0	0	0
F3M	0	2	0	0	0	0	0	0	0	0	0.2
F2M	0	0	0	0	0	0	0	0	0	0	0
F1M	0	0	0	0	0	0	0	0	0	0	0

## Sheet: periarterial inflammation
Purpose: quantify periarterial inflammation												Scoring system
10 40X fields												0	none
												1	0-25% circumference with >1 leukocyte cell layer
	field											2	26-50% circumference with >1 leukocyte cell layer
Mouse	1	2	3	4	5	6	7	8	9	10	Mean	3	50-100% circumference with >1 leukocyte cell layer
M1.2	1	0	0	0	0	0	0	0	1	0	0.2
M2.2	0	1	0	0	0	0	0	0	0	0	0.1
M3.2	0	0	0	0	0	0	0	0	2	1	0.3
F1.2	0	0	0	0	0	0	0	0	0	0	0
F2.2	0	0	0	0	0	0	0	0	0	0	0
F3.2	0	0	0	0	0	0	0	0	0	0	0
M1.4	0	1	0	0	0	3	1	1	0	0	0.6
M2.4	0	1	0	0	0	1	0	0	0	0	0.2
M3.4	0	1	2	0	0	0	0	1	0	2	0.6
F1.4	1	0	1	0	0	0	0	0	1	1	0.4
F2.4	0	1	0	0	0	1	3	2	0	0	0.7
F3.4	1	1	0	0	1	0	0	1	1	0	0.5
M1.7	2	2	2	2	0	1	1	0	3	0	1.3
M2.7	1	0	0	1	3	2	2	1	3	0	1.3
M3.7	1	0	3	0	1	2	2	2	1	2	1.4
F3.7	3	0	1	0	1	0	3	1	2	0	1.1
F2.7	0	0	2	1	2	0	1	0	0	2	0.8
F1.7	0	1	1	1	1	0	0	1	3	1	0.9
M1M	0	0	0	0	0	0	0	0	0	0	0
M2M	0	0	0	0	0	0	0	0	0	0	0
M3M	0	0	0	0	0	0	0	0	0	0	0
F3M	0	3	0	0	0	0	0	0	0	0	0.3
F2M	0	0	0	0	0	0	0	0	0	0	0
F1M	0	0	0	0	0	0	0	0	0	0	0

## Sheet: endarteritis
Purpose: quantify endarterial inflammation												Scoring system
10 40X fields												0	none
												1	0-25% circumference with ≥1 leukocyte cell layer
	field											2	26-50% circumference with ≥1 leukocyte cell layer
Mouse	1	2	3	4	5	6	7	8	9	10	Mean	3	50-100% circumference with ≥1 leukocyte cell layer
M1.2	3	3	3	3	1	2	1	3	3	0	2.2
M2.2	3	3	0	3	1	0	3	1	1	0	1.5
M3.2	2	1	1	1	3	3	2	0	3	3	1.9
F1.2	0	3	2	1	1	3	2	3	3	1	1.9
F2.2	2	3	1	3	3	2	3	0	2	0	1.9
F3.2	3	3	2	1	0	2	2	3	3	1	2
M1.4	1	1	1	0	0	0	1	1	0	0	0.5
M2.4	2	1	0	0	0	1	1	0	0	0	0.5
M3.4	1	2	3	0	0	0	1	1	0	3	1.1
F1.4	0	0	0	0	0	0	0	0	0	1	0.1
F2.4	1	3	0	0	0	2	0	1	0	0	0.7
F3.4	1	0	0	0	1	0	0	0	0	0	0.2
M1.7	0	0	1	0	0	1	0	0	0	0	0.2
M2.7	1	1	0	0	0	0	0	0	0	0	0.2
M3.7	0	1	0	0	1	1	1	0	0	0	0.4
F3.7	0	0	1	0	0	0	0	0	1	0	0.2
F2.7	0	0	0	0	0	0	0	0	0	0	0
F1.7	1	0	0	1	1	0	0	0	0	0	0.3
M1M	0	0	0	0	0	0	0	0	0	0	0
M2M	0	0	0	0	0	0	0	0	0	0	0
M3M	0	0	0	0	0	0	0	0	0	0	0
F3M	0	1	0	0	0	0	0	0	0	0	0.1
F2M	0	0	0	0	0	0	0	0	0	0	0
F1M	0	0	0	0	0	0	0	0	0	0	0

## Sheet: venulitis
Purpose: quantify endovenular inflammation												Scoring system
10 40X fields												0	none
												1	0-25% circumference with >1 leukocyte cell layer
	field											2	26-50% circumference with >1 leukocyte cell layer
Mouse	1	2	3	4	5	6	7	8	9	10	Mean	3	50-100% circumference with >1 leukocyte cell layer
M1.2	0	0	0	1	0	1	1	0	0	0	0.3
M2.2	1	2	1	0	1	0	3	2	1	2	1.3
M3.2	2	1	3	0	0	1	0	2	1	0	1
F1.2	3	3	1	0	0	1	1	0	1	0	1
F2.2	3	2	0	0	0	0	1	1	1	1	0.9
F3.2	0	0	1	3	3	2	1	1	0	0	1.1
M1.4	0	0	0	0	1	0	1	1	0	1	0.4
M2.4	2	0	0	0	0	0	0	0	0	1	0.3
M3.4	0	1	0	1	0	1	1	1	1	0	0.6
F1.4	0	0	0	0	0	1	1	0	0	0	0.2
F2.4	1	0	1	1	0	0	0	0	0	1	0.4
F3.4	0	0	0	0	0	0	0	1	1	0	0.2
M1.7	0	1	0	0	1	0	0	0	0	1	0.3
M2.7	0	0	0	0	0	0	0	0	0	0	0
M3.7	0	0	0	0	0	0	1	0	0	1	0.2
F3.7	0	0	0	0	0	1	1	0	0	0	0.2
F2.7	1	0	0	0	0	0	0	0	1	1	0.3
F1.7	0	1	0	0	1	0	0	0	0	0	0.2
M1M	0	0	0	0	0	0	0	0	0	0	0
M2M	0	0	0	0	0	0	0	0	0	0	0
M3M	0	0	0	0	0	0	0	0	0	0	0
F3M	0	0	0	0	0	0	0	0	0	0	0
F2M	0	0	0	0	0	0	0	0	0	0	0
F1M	0	0	0	0	0	0	0	0	0	0	0

## Sheet: perivenule inflammation
Purpose: quantify perivenular inflammation												Scoring system
10 40X fields												0	none
												1	0-25% circumference with >1 leukocyte cell layer
	field											2	26-50% circumference with >1 leukocyte cell layer
Mouse	1	2	3	4	5	6	7	8	9	10	Mean	3	50-100% circumference with >1 leukocyte cell layer
M1.2	0	1	1	1	0	0	0	1	1	0	0.5
M2.2	0	3	3	0	0	1	1	1	0	2	1.1
M3.2	1	2	1	0	0	1	0	1	1	0	0.7
F1.2	0	0	0	0	0	1	0	0	1	0	0.2
F2.2	2	0	0	0	0	0	1	1	1	1	0.6
F3.2	0	0	0	3	3	2	1	1	0	0	1
M1.4	1	0	0	1	1	2	3	2	3	2	1.5
M2.4	2	0	0	0	0	0	0	0	1	2	0.5
M3.4	0	1	2	3	1	3	2	2	2	0	1.6
F1.4	0	0	1	1	1	3	1	1	0	0	0.8
F2.4	2	1	3	1	1	0	0	0	0	0	0.8
F3.4	0	0	2	0	0	0	0	1	3	1	0.7
M1.7	2	2	3	3	3	2	0	1	1	3	2
M2.7	0	3	3	1	2	0	1	3	2	3	1.8
M3.7	2	3	3	0	2	3	3	2	2	3	2.3
F3.7	2	0	0	0	0	3	3	2	2	0	1.2
F2.7	3	1	3	3	1	2	3	2	3	3	2.4
F1.7	2	3	3	2	3	2	2	3	3	2	2.5
M1M	0	0	0	0	0	0	0	0	0	0	0
M2M	0	0	0	0	1	0	0	0	0	0	0.1
M3M	0	0	0	0	0	0	0	0	0	0	0
F3M	0	2	0	0	0	0	0	0	0	0	0.2
F2M	0	0	1	0	1	0	0	0	0	0	0.2
F1M	0	0	0	0	0	0	0	0	0	0	0

## Sheet: interstitial lymphocytic pneum
Purpose: interstital (alveolar sepate) inflammation												Scoring system
10 10X fields												state percentage of pulmonary alveolar parenchyma with septae expanded by leukocyte
	Pathologist
Mouse	1	2	3	4	5	6	7	8	9	10	Mean
M1.2	0.02	0	0	0.05	0.02	0.04	0	0.03	0.02	0.05	0.023
M2.2	0.05	0.05	0.02	0	0	0.02	0	0.02	0.02	0	0.018
M3.2	0	0.02	0	0.02	0	0	0.1	0.3	0.05	0.15	0.064
F1.2	0	0.15	0.02	0.04	0	0.1	0.01	0.02	0	0	0.034
F2.2	0	0.01	0	0.04	0	0.01	0	0	0	0.01	0.007
F3.2	0	0.03	0	0	0.02	0.01	0.03	0.08	0.02	0	0.019
M1.4	0.02	0.04	0.02	0.04	0.02	0.01	0.01	0.01	0	0	0.017
M2.4	0.01	0.02	0.04	0	0.02	0.01	0	0	0	0	0.01
M3.4	0.02	0.01	0.05	0.02	0	0.05	0.03	0.02	0	0.01	0.021
F1.4	0.01	0.01	0	0	0.02	0	0	0.01	0.02	0	0.007
F2.4	0.02	0	0	0.01	0.02	0.05	0.02	0.02	0.03	0	0.017
F3.4	0	0	0	0	0	0.01	0	0.01	0	0.02	0.004
M1.7	0.05	0.1	0.05	0.03	0.03	0.05	0.02	0.02	0.03	0.1	0.048
M2.7	0.08	0.05	0.04	0.1	0.02	0	0.05	0.02	0.03	0.02	0.041
M3.7	0.1	0.07	0.02	0.05	0.02	0.01	0.02	0.03	0.02	0.02	0.036
F3.7	0.05	0.1	0.01	0	0.05	0.02	0.02	0.01	0.02	0.02	0.03
F2.7	0.02	0.03	0.02	0.01	0.1	0.3	0.02	0.05	0.04	0.05	0.064		focal organizing pneumonia
F1.7	0.05	0.05	0.02	0.04	0.02	0.1	0.05	0.04	0.02	0.08	0.047
M1M	0	0	0	0	0	0	0	0	0	0	0
M2M	0	0	0	0	0	0	0.01	0.01	0	0	0.002
M3M	0	0	0	0	0	0	0	0	0	0	0
F3M	0	0	0.02	0	0	0	0	0	0	0	0.002
F2M	0	0	0	0	0	0.03	0	0	0	0	0.003
F1M	0	0	0	0	0	0	0	0	0	0	0

## Sheet: pulmonary edema
Purpose: interstital (alveolar sepate) inflammation												Scoring system
10 10X fields												state percentage of pulmonary alveolarairspaces filled with edema (eosinophilic material)
	Pathologist
Mouse	1	2	3	4	5	6	7	8	9	10	Mean
M1.2	0	0	0	0	0	0	0	0	0	0	0
M2.2	0	0	0	0	0	0	0	0	0	0	0
M3.2	0	0	0	0	0	0	0	0	0	0	0
F1.2	0	0	0	0	0	0	0	0	0	0	0
F2.2	0	0	0	0	0	0	0	0	0	0	0
F3.2	0	0	0	0	0	0	0	0	0	0	0
M1.4	0	0	0	0	0	0	0.05	0	0	0	0.005
M2.4	0	0	0	0	0	0	0	0	0	0	0
M3.4	0	0	0	0	0	0	0	0	0.1	0	0.01		flocculent ?edema
F1.4	0	0	0	0	0	0	0	0	0	0	0
F2.4	0	0	0	0	0	0	0	0	0	0	0
F3.4	0	0	0	0	0	0	0	0	0	0	0
M1.7	0	0	0	0	0	0	0.05	0	0	0	0.005		flocculent ?edema
M2.7	0	0	0	0	0	0	0	0	0	0	0
M3.7	0	0	0	0	0	0	0	0	0	0	0
F3.7	0	0	0	0	0	0	0	0	0	0	0
F2.7	0	0	0	0	0.05	0	0	0	0	0	0.005		inspisated and flocculent
F1.7	0	0	0.1	0	0	0	0	0	0	0	0.01		inspisated and flocculent
M1M	0	0	0	0	0	0	0	0	0	0	0
M2M	0	0	0	0	0	0	0	0	0	0	0
M3M	0	0	0	0	0	0	0	0	0	0	0
F3M	0	0	0	0	0	0	0	0	0	0	0
F2M	0	0	0	0	0	0	0	0	0	0	0
F1M	0	0	0	0	0	0	0	0	0	0	0
