# Supplementary material for: A C57BL/6 Mouse Model of SARS-CoV-2 Infection Recapitulates Age- and Sex-Based Differences in Human COVID-19 Disease and Recovery
Source: Vaccines (Basel). 2022 Dec 25;11(1):47. doi: 10.3390/vaccines11010047 (PMC9860616; doi:10.3390/vaccines11010047)
Supplement: Supplementary file 1 [file vaccines-11-00047-s001.zip › Supplemental Table S6.xlsx]

## Sheet: Bronchial  cell death
Purpose: measure apoptosis in bronchial epithelial cells												Scoring system
10 40X fields												0	0 apoptotic bodies per 40X field
												1	1-5 apoptotic bodies per 40X field
	field											2	6-10 apoptotic bodies per 40X field
Mouse	1	2	3	4	5	6	7	8	9	10	Mean	3	11-20 apoptotic bodies per 40X field
M1.2	1	4	4	1	0	1	1	2	1	4	1.9	4	>20 apoptotic bodies per 40X field
M2.2	4	4	1	2	1	4	0	0	4	4	2.4
M3.2	0	4	1	2	3	4	1	3	1	3	2.2
F1.2	4	2	4	4	3	0	4	3	1	2	2.7
F2.2	3	4	1	2	1	4	3	0	3	1	2.2
F3.2	0	0	0	0	0	4	1	0	0	0	0.5
M1.4	0	0	0	0	1	0	0	0	0	0	0.1
M2.4	0	0	0	1	0	1	1	0	1	0	0.4
M3.4	2	1	0	0	0	0	1	0	0	1	0.5
F1.4	1	1	1	1	0	1	0	0	1	1	0.7
F2.4	1	0	1	1	0	0	0	0	1	0	0.4
F3.4	0	0	0	0	0	0	0	1	0	0	0.1
M1.7											#DIV/0!
M2.7	0	0	1	1	0	0	0	0	0	1	0.3
M3.7	1	0	1	1	1	0	0	0	0	1	0.5
F3.7	0	1	0	0	0	0	1	0	1	0	0.3
F2.7	0	1	0	0	0	0	1	0	0	0	0.2
F1.7											#DIV/0!
M1M	0	0	0	0	0	0	0	0	0	0	0
M2M	0	0	0	0	0	1	0	0	0	0	0.1
M3M	0	0	0	0	0	0	0	0	1	0	0.1
F3M	0	0	0	0	0	0	0	0	0	0	0
F2M	0	0	0	0	0	0	0	0	0	0	0
F1M	0	0	0	0	0	0	0	1	0	0	0.1

## Sheet: peribronchial inflammation
Purpose: quantify peribronchial inflammation												Scoring system
10 40X fields												0	none
												1	0-25% circumference with >1 leukocyte cell layer
	field											2	26-50% circumference with >1 leukocyte cell layer
Mouse	1	2	3	4	5	6	7	8	9	10	Mean	3	50-100% circumference with >1 leukocyte cell layer
M1.2	0	0	0	0	0	0	0	0	1	1	0.2
M2.2	0	0	0	0	1	1	0	0	1	0	0.3
M3.2	0	1	0	0	0	0	1	0	0	0	0.2
F1.2	1	0	0	0	0	0	0	2	1	1	0.5
F2.2	0	0	0	0	0	0	1	0	0	0	0.1
F3.2	0	2	0	0	0	0	0	0	0	0	0.2
M1.4	0	0	1	1	0	0	0	0	0	1	0.3
M2.4	0	0	0	0	1	0	0	0	0	0	0.1
M3.4	0	0	0	0	1	1	0	1	0	0	0.3
F1.4	1	0	0	1	0	0	0	0	0	1	0.3
F2.4	0	0	1	1	0	0	1	1	0	0	0.4
F3.4	0	0	0	0	0	0	0	0	0	0	0
M1.7											#DIV/0!
M2.7	0	0	1	2	1	2	1	1	1	2	1.1
M3.7	0	1	1	0	1	1	2	2	1	1	1
F3.7	1	1	1	1	1	1	2	2	1	2	1.3
F2.7	0	1	1	1	1	1	1	1	0	0	0.7
F1.7											#DIV/0!
M1M	0	0	0	0	0	0	0	0	0	0	0
M2M	0	0	0	0	0	0	0	0	0	0	0
M3M	0	0	0	0	1	0	0	0	0	0	0.1
F3M	0	0	0	0	0	0	0	1	0	0	0.1
F2M	0	0	0	0	0	0	0	0	0	0	0
F1M	0	0	0	1	0	0	0	0	0	0	0.1

## Sheet: periarterial inflammation
Purpose: quantify periarterial inflammation												Scoring system
10 40X fields												0	none
												1	0-25% circumference with >1 leukocyte cell layer
	field											2	26-50% circumference with >1 leukocyte cell layer
Mouse	1	2	3	4	5	6	7	8	9	10	Mean	3	50-100% circumference with >1 leukocyte cell layer
M1.2	0	0	1	0	0	0	0	0	0	3	0.4
M2.2	1	0	0	0	0	0	0	1	0	1	0.3
M3.2	0	1	0	0	0	0	0	0	0	0	0.1
F1.2	0	1	0	0	0	0	0	0	1	0	0.2
F2.2	0	0	0	0	0	0	0	0	0	0	0
F3.2	0	0	0	0	0	1	0	0	0	0	0.1
M1.4	0	0	0	0	1	0	0	0	1	0	0.2
M2.4	0	0	1	1	0	0	0	0	0	0	0.2
M3.4	2	1	0	0	1	3	2	0	0	0	0.9
F1.4	0	0	0	1	0	0	0	0	1	0	0.2
F2.4	0	0	0	1	0	0	0	0	0	1	0.2
F3.4	0	0	0	0	0	0	0	0	0	0	0
M1.7											#DIV/0!
M2.7	2	1	2	2	1	1	1	0	1	1	1.2
M3.7	3	1	1	1	1	1	3	1	0	0	1.2
F3.7	2	3	1	2	2	1	0	1	2	3	1.7
F2.7	0	1	2	1	2	0	1	0	1	0	0.8
F1.7											#DIV/0!
M1M	0	0	0	0	0	0	0	0	0	0	0
M2M	0	0	0	0	0	0	0	0	0	0	0
M3M	0	0	1	0	0	0	0	0	0	0	0.1
F3M	0	0	0	0	0	0	0	0	0	0	0
F2M	0	0	0	0	0	0	0	0	0	0	0
F1M	0	0	0	1	0	0	0	0	0	0	0.1

## Sheet: endarteritis
Purpose: quantify endarterial inflammation												Scoring system
10 40X fields												0	none
												1	0-25% circumference with ≥1 leukocyte cell layer
	field											2	26-50% circumference with ≥1 leukocyte cell layer
Mouse	1	2	3	4	5	6	7	8	9	10	Mean	3	50-100% circumference with ≥1 leukocyte cell layer
M1.2	3	3	2	3	1	3	3	3	2	1	2.4
M2.2	3	0	0	1	0	0	0	3	1	2	1
M3.2	0	1	0	0	1	0	0	1	0	1	0.4
F1.2	3	3	0	0	0	0	0	0	2	3	1.1
F2.2	3	3	1	1	0	0	3	0	2	1	1.4
F3.2	0	2	0	0	0	0	0	0	0	0	0.2
M1.4	3	0	1	3	0	1	0	3	0	0	1.1
M2.4	1	1	1	1	0	0	0	2	2	1	0.9
M3.4	0	0	1	1	1	3	1	0	1	1	0.9
F1.4	0	0	0	1	0	0	1	2	3	0	0.7
F2.4	1	1	1	1	0	0	0	1	0	2	0.7
F3.4	1	1	3	2	0	2	0	0	0	0	0.9
M1.7											#DIV/0!
M2.7	1	0	1	3	2	0	0	0	0	1	0.8
M3.7	3	2	1	3	3	3	2	0	0	0	1.7
F3.7	0	1	0	1	0	2	0	0	3	3	1
F2.7	0	0	0	0	0	0	1	3	1	1	0.6
F1.7											#DIV/0!
M1M	0	0	0	0	0	0	0	0	0	0	0
M2M	0	0	0	0	0	0	0	0	0	0	0
M3M	0	0	1	0	0	0	0	0	0	0	0.1
F3M	0	1	0	0	0	0	0	1	0	0	0.2
F2M	0	0	0	0	0	0	0	0	0	0	0
F1M	0	0	0	3	0	0	1	0	0	0	0.4

## Sheet: venulitis
Purpose: quantify endovenular inflammation												Scoring system
10 40X fields												0	none
												1	0-25% circumference with >1 leukocyte cell layer
	field											2	26-50% circumference with >1 leukocyte cell layer
Mouse	1	2	3	4	5	6	7	8	9	10	Mean	3	50-100% circumference with >1 leukocyte cell layer
M1.2	1	2	3	3	2	3	1	0	1	0	1.6
M2.2	2	1	2	2	2	1	0	0	0	3	1.3
M3.2	2	1	1	1	1	1	1	0	0	2	1
F1.2	1	1	0	0	1	2	0	0	1	1	0.7
F2.2	1	2	1	0	0	1	0	0	0	2	0.7
F3.2	0	1	0	0	0	0	0	0	0	0	0.1
M1.4	0	0	1	0	0	0	0	1	1	0	0.3
M2.4	0	0	0	1	1	0	0	0	0	0	0.2
M3.4	0	0	0	1	0	0	0	0	0	0	0.1
F1.4	0	0	0	0	0	1	0	0	0	0	0.1
F2.4	0	0	0	0	1	0	1	2	0	1	0.5
F3.4	0	1	0	0	0	0	0	0	0	0	0.1
M1.7											#DIV/0!
M2.7	1	0	0	0	0	1	1	2	0	1	0.6
M3.7	0	0	0	0	1	0	1	1	0	1	0.4
F3.7	0	0	0	1	0	0	1	0	1	0	0.3
F2.7	0	0	0	0	0	0	0	0	0	0	0
F1.7											#DIV/0!
M1M	0	0	0	0	0	0	0	0	0	0	0
M2M	0	0	0	0	0	0	0	0	0	0	0
M3M	0	0	0	0	0	0	0	0	0	0	0
F3M	0	0	0	0	0	0	0	0	0	0	0
F2M	0	0	0	0	0	0	0	0	0	0	0
F1M	0	0	0	0	0	0	0	0	0	0	0

## Sheet: perivenule inflammation
Purpose: quantify perivenular inflammation												Scoring system
10 40X fields												0	none
												1	0-25% circumference with >1 leukocyte cell layer
	field											2	26-50% circumference with >1 leukocyte cell layer
Mouse	1	2	3	4	5	6	7	8	9	10	Mean	3	50-100% circumference with >1 leukocyte cell layer
M1.2	1	1	0	1	2	1	2	0	1	0	0.9
M2.2	0	0	0	2	0	0	0	1	2	0	0.5
M3.2	2	3	2	1	1	1	1	0	1	3	1.5
F1.2	1	1	0	0	1	2	0	0	1	0	0.6
F2.2	3	3	1	1	0	3	1	0	0	0	1.2
F3.2	0	2	0	0	0	0	0	0	0	0	0.2
M1.4	2	0	3	1	2	0	1	3	2	1	1.5
M2.4	2	1	0	3	1	1	1	1	1	1	1.2
M3.4	3	2	2	1	2	1	1	1	0	3	1.6
F1.4	1	1	1	1	3	3	1	2	0	0	1.3
F2.4	0	1	2	1	1	1	2	3	1	2	1.4
F3.4	3	3	2	0	0	1	0	0	0	0	0.9
M1.7											#DIV/0!
M2.7	3	3	3	2	3	3	3	1	1	2	2.4
M3.7	3	1	0	2	3	2	3	2	1	2	1.9
F3.7	3	3	2	1	3	2	1	0	1	2	1.8
F2.7	2	1	0	3	2	2	3	3	2	1	1.9
F1.7											#DIV/0!
M1M	0	0	0	0	0	0	0	0	0	0	0
M2M	0	0	0	0	0	0	0	0	0	0	0
M3M	0	0	0	0	0	0	0	1	0	0	0.1
F3M	0	0	2	0	0	0	0	0	1	0	0.3
F2M	0	0	0	0	0	0	0	0	0	0	0
F1M	0	0	0	3	2	0	0	0	0	0	0.5

## Sheet: interstitial lymphocytic pneum
Purpose: interstital (alveolar sepate) inflammation												Scoring system
10 10X fields												state percentage of pulmonary alveolar parenchyma with septae expanded by leukocyte
	Pathologist
Mouse	1	2	3	4	5	6	7	8	9	10	Mean
M1.2	0	0.01	0.07	0.1	0.05	0.05	0.04	0.02	0.05	0.02	0.041
M2.2	0.02	0.02	0	0	0	0.06	0.02	0.01	0	0.02	0.015
M3.2	0.02	0.01	0	0.01	0.02	0.02	0.02	0.03	0.01	0.01	0.015
F1.2	0	0	0.01	0.1	0.02	0.05	0.1	0.05	0	0	0.033
F2.2	0.03	0	0	0.02	0.01	0.02	0.01	0.01	0	0.05	0.015
F3.2	0.01	0	0	0	0	0	0	0	0.01	0	0.002
M1.4	0.02	0.01	0	0	0.01	0.02	0.04	0.02	0.01	0	0.013
M2.4	0.02	0	0.02	0.01	0.04	0	0.01	0	0.01	0.02	0.013
M3.4	0.05	0.02	0.03	0.03	0.02	0.01	0.01	0.02	0	0.02	0.021
F1.4	0.02	0	0	0	0	0.02	0.02	0.04	0.06	0.03	0.019
F2.4	0.05	0.02	0.04	0.03	0.02	0.07	0.02	0.03	0.01	0	0.029
F3.4	0	0	0.01	0	0	0.02	0	0.02	0.04	0.02	0.011
M1.7											#DIV/0!
M2.7	0.07	0.03	0.02	0.4	0.7	0.4	0.3	0.2	0.1	0.25	0.247
M3.7	0.07	0.4	0.03	0.05	0.1	0.1	0.2	0.5	0.05	0.07	0.157
F3.7	0.04	0.2	0.25	0.3	0.2	0.05	0.07	0.5	0.04	0.3	0.195
F2.7	0.01	0.03	0.02	0.02	0.1	0.02	0.02	0	0.01	0.02	0.025
F1.7											#DIV/0!
M1M	0	0	0	0	0.01	0	0	0	0	0	0.001
M2M	0	0	0	0	0	0	0	0	0	0	0
M3M	0	0	0	0	0	0	0	0.05	0	0	0.005
F3M	0	0	0.01	0	0	0	0	0	0	0	0.001
F2M	0	0.02	0	0.03	0	0	0	0	0	0	0.005
F1M	0	0	0	0.05	0.01	0.01	0	0	0	0	0.007

## Sheet: pulmonary edema
Purpose: interstital (alveolar sepate) inflammation												Scoring system
10 10X fields												state percentage of pulmonary alveolarairspaces filled with edema (eosinophilic material)
	Pathologist
Mouse	1	2	3	4	5	6	7	8	9	10	Mean
M1.2	0	0	0	0	0	0	0	0	0	0	0
M2.2	0	0	0	0	0	0	0	0	0	0	0
M3.2	0	0	0	0	0	0	0	0	0	0	0
F1.2	0	0	0	0	0	0	0	0	0	0	0
F2.2	0	0	0	0	0	0	0	0	0	0	0
F3.2	0	0	0	0	0	0	0	0	0	0	0
M1.4	0	0	0	0	0	0	0	0	0	0	0
M2.4	0	0	0	0.05	0	0	0	0	0	0	0.005		flocculent
M3.4	0	0	0	0	0	0	0	0	0	0	0
F1.4	0	0.2	0.1	0	0	0	0	0.1	0	0	0.04		flocculent
F2.4	0	0	0	0	0.5	0	0.1	0.02	0	0	0.062		flocculent (mostly) and inspisated
F3.4	0	0	0	0	0	0.6	0.1	0.5	0	0	0.12		flocculent
M1.7											#DIV/0!
M2.7	0.25	0.05	0	0	0	0	1	0.4	0.3	0.1	0.21		inspissated
M3.7	0.2	0	0	0.25	0.6	0.7	0.6	0.05	0.4	0	0.28		inspissated
F3.7	0.2	0.1	0.2	0.4	0.9	0.05	0.7	0	0	0	0.255		inspissated
F2.7	0	0	0.1	0.25	0	0	0	0	0	0	0.035		flocculent (mostly) and inspisated
F1.7											#DIV/0!
M1M	0	0	0	0	0	0	0	0	0	0	0
M2M	0	0	0	0	0	0	0	0	0	0	0
M3M	0	0	0	0	0	0	0	0	0	0	0
F3M	0	0	0	0	0	0	0	0	0	0	0
F2M	0	0	0	0	0	0	0	0	0	0	0
F1M	0	0	0	0	0	0	0	0	0	0	0
