# Supplementary material for: A C57BL/6 Mouse Model of SARS-CoV-2 Infection Recapitulates Age- and Sex-Based Differences in Human COVID-19 Disease and Recovery
Source: Vaccines (Basel). 2022 Dec 25;11(1):47. doi: 10.3390/vaccines11010047 (PMC9860616; doi:10.3390/vaccines11010047)
Supplement: Supplementary file 1 [file vaccines-11-00047-s001.zip › Supplemental Table S7.xlsx]

## Sheet: Bronchial  cell death
Purpose: measure apoptosis in bronchial epithelial cells												Scoring system
10 40X fields												0	0 apoptotic bodies per 40X field
												1	1-5 apoptotic bodies per 40X field
	field											2	6-10 apoptotic bodies per 40X field
												3	11-20 apoptotic bodies per 40X field
Mouse	1	2	3	4	5	6	7	8	9	10	Mean	4	>20 apoptotic bodies per 40X field
M1.2	4	4	3	2	2	4	3	4	4	4	3.4		amyloidosis	pulmonary adenoma
M2.2	2	4	1	4	4	4	4	0	2	1	2.6		amyloidosis
M3.2	4	3	4	1	4	4	3	4	2	3	3.2		amyloidosis	focal acute bronchiolitis with foreign body
F1.2	4	4	1	1	3	4	1	2	1	0	2.1
F2.2	4	1	0	3	1	4	0	1	1	2	1.7
F3.2	4	3	1	4	1	1	0	4	1	4	2.3
M1.4	4	1	2	4	1	1	4	2	0	0	1.9		amyloidosis
M2.4	1	0	1	0	0	0	0	0	1	0	0.3		amyloidosis
M3.4	1	1	0	1	2	4	1	0	3	4	1.7		amyloidosis
F1.4	0	0	0	0	0	0	0	0	0	0	0		amyloidosis - very mild (focal lung - pulmonary veins)
F2.4	0	0	0	0	1	0	1	0	0	1	0.3		amyloidosis - very mild (focal cardiac and lung)
F3.4	4	1	0	0	1	1	0	0	0	1	0.8
M1.6	0	0	0	1	1	0	1	0	0	0	0.3		amyloidosis
M1.7	2	1	1	0	1	0	0	0	1	0	0.6		amyloidosis, lung adenoma
M2.7	1	0	0	0	0	0	0	0	0	1	0.8		amyloidosis - very mild (a few pulmonary veins)
F1.5	1	1	1	1	0	0	0	0	0	0	0.4		amyloidosis - very mild (a few pulmonary veins)
F1.7	0	0	1	0	0	0	0	1	0	0	0.2		amyloidosis - very mild (a few pulmonary veins)	intrabronchiolar crystals, eosinophilic				https://ntp.niehs.nih.gov/nnl/respiratory/lung/crystal/index.htm
F2.7	0	0	1	1	0	0	1	0	0	1	0.4		possible minute foci of cardiac amyloid
F3.7	0	0	1	0	0	0	1	0	0	0	0.2
M1.M	0	0	0	0	0	0	0	1	0	0	0.1		amyloidosis - very mild (focal cardiac and lung)
M2.M	0	0	0	0	0	0	0	0	0	0	0		amyloidosis
M3.M	0	0	0	0	0	0	0	0	0	0	0		amyloidosis - very mild (focal cardiac and lung)
F1.M	0	0	0	0	0	0	0	0	0	0	0		amyloidosis - mild (focal cardiac and lung)
F2.M	0	0	0	0	0	0	0	0	0	0	0		amyloidosis - mild (focal cardiac and lung)
F3.M	0	0	0	0	0	0	0	0	0	0	0		amyloidosis - mild (focal cardiac and lung)
BL6 1.7											#DIV/0!

## Sheet: peribronchial inflammation
Purpose: quantify peribronchial inflammation												Scoring system
10 40X fields												0	none
												1	0-25% circumference with >1 leukocyte cell layer
	field											2	26-50% circumference with >1 leukocyte cell layer
Mouse	1	2	3	4	5	6	7	8	9	10	Mean	3	50-100% circumference with >1 leukocyte cell layer
M1.2	1	1	0	0	1	0	0	0	1	0	0.4
M2.2	2	1	1	0	2	0	1	0	0	0	0.7
M3.2	0	1	0	0	0	0	0	1	0	0	0.2
F1.2	0	0	1	1	2	0	0	0	0	0	0.4
F2.2	1	0	1	0	0	2	1	0	1	1	0.7
F3.2	0	1	0	1	0	0	0	0	1	0	0.3
M1.4	1	0	0	0	0	0	0	0	0	0	0.1
M2.4	2	0	0	0	0	0	0	0	0	0	0.2
M3.4	0	1	0	0	1	0	0	1	0	1	0.4
F1.4	1	0	0	0	0	0	0	1	0	0	0.2
F2.4	0	0	0	0	0	0	0	1	0	1	0.2
F3.4	0	0	0	0	0	0	0	1	0	0	0.1
M1.6	0	0	0	0	0	1	0	0	0	0	0.1
M1.7	1	0	0	1	2	1	0	0	0	0	0.5
M2.7	0	1	2	1	0	1	1	0	1	1	0.8
F1.5	0	0	0	0	0	1	0	1	0	0	0.2
F1.7	1	0	1	2	1	0	2	1	0	0	0.8
F2.7	0	0	0	1	2	0	1	1	0	1	0.6
F3.7	1	1	0	1	2	0	1	0	1	0	0.7
M1.M	0	0	0	0	0	0	0	0	0	0	0
M2.M	0	0	1	0	0	0	1	0	0	0	0.2
M3.M	0	0	0	0	0	1	0	0	0	0	0.1
F1.M	1	0	2	0	1	0	0	0	3	3	1
F2.M	0	1	0	1	0	0	0	0	0	1	0.3
F3.M	0	0	0	1	0	0	0	0	0	0	0.1
BL6 1.7											#DIV/0!

## Sheet: periarterial inflammation
Purpose: quantify periarterial inflammation												Scoring system
10 40X fields												0	none
												1	0-25% circumference with >1 leukocyte cell layer
	field											2	26-50% circumference with >1 leukocyte cell layer
Mouse	1	2	3	4	5	6	7	8	9	10	Mean	3	50-100% circumference with >1 leukocyte cell layer
M1.2	1	0	0	0	0	0	0	1	1	2	0.5
M2.2	0	0	0	0	1	1	2	0	3	0	0.7
M3.2	1	0	0	0	0	0	0	0	0	0	0.1
F1.2	0	0	0	0	1	0	3	3	1	2	1
F2.2	0	0	1	1	1	3	3	1	0	3	1.3
F3.2	0	0	1	0	0	0	0	1	0	1	0.3
M1.4	0	0	0	3	0	0	2	0	0	0	0.5
M2.4	1	0	0	1	1	0	0	0	0	0	0.3
M3.4	1	1	0	0	1	1	1	0	0	1	0.6
F1.4	1	0	0	0	0	1	0	0	1	1	0.4
F2.4	3	1	1	0	0	1	0	1	0	0	0.7
F3.4	0	0	0	0	0	1	0	1	0	1	0.3
M1.6	1	0	1	1	1	0	1	1	0	0	0.6
M1.7	1	2	1	0	1	1	0	0	1	1	0.8
M2.7	3	0	1	3	0	1	3	0	0	1	1.2
F1.5	0	1	0	0	0	1	0	0	0	2	0.4
F1.7	1	0	0	2	1	1	1	3	3	2	1.4
F2.7	2	1	0	0	2	3	3	2	3	2	1.8
F3.7	1	2	1	1	1	2	2	2	1	1	1.4
M1.M	0	0	0	0	0	0	0	1	0	0	0.1
M2.M	0	0	3	0	1	1	2	1	0	1	0.9
M3.M	0	1	0	0	0	0	0	0	0	0	0.1
F1.M	3	1	0	3	3	1	0	0	0	3	1.4
F2.M	1	0	0	0	0	0	0	0	3	0	0.4
F3.M	0	0	0	0	0	0	1	0	0	0	0.1
BL6 1.7											#DIV/0!

## Sheet: endarteritis
Purpose: quantify endarterial inflammation												Scoring system
10 40X fields												0	none
												1	0-25% circumference with ≥1 leukocyte cell layer
	field											2	26-50% circumference with ≥1 leukocyte cell layer
Mouse	1	2	3	4	5	6	7	8	9	10	Mean	3	50-100% circumference with ≥1 leukocyte cell layer
M1.2	1	1	1	2	0	1	2	1	1	2	1.2
M2.2	1	1	0	1	0	0	0	0	0	2	0.5
M3.2	2	2	1	0	1	1	1	1	2	1	1.2
F1.2	0	0	0	0	0	1	1	1	0	0	0.3
F2.2	1	0	1	1	3	1	3	1	2	1	1.4
F3.2	1	2	1	1	3	3	0	2	0	2	1.5
M1.4	0	0	1	0	0	0	0	1	0	0	0.2
M2.4	1	0	0	0	0	1	2	0	0	0	0.4
M3.4	0	0	0	0	1	0	0	0	0	2	0.3
F1.4	0	0	1	1	0	0	0	0	1	1	0.4
F2.4	0	1	0	0	0	0	1	0	0	0	0.2
F3.4	0	1	0	0	0	0	0	1	0	0	0.2
M1.6	0	0	0	0	0	0	1	0	0	0	0.1
M1.7	0	0	0	0	2	0	0	0	0	0	0.2
M2.7	0	0	0	0	0	1	0	0	0	1	0.2
F1.5	0	0	0	0	0	0	0	0	0	0	0
F1.7	0	0	1	1	1	0	0	0	0	0	0.3
F2.7	1	0	0	0	0	1	1	1	0	0	0.4
F3.7	1	1	0	0	0	2	1	0	0	0	0.5
M1.M	0	0	0	0	0	0	0	1	0	0	0.1
M2.M	0	0	0	0	0	0	1	1	0	0	0.2
M3.M	0	0	0	0	0	0	0	0	0	0	0
F1.M	0	0	0	0	2	0	0	0	0	0	0.2
F2.M	0	0	0	0	0	0	0	0	0	0	0
F3.M	0	0	0	0	0	0	0	0	0	0	0
BL6 1.7											#DIV/0!

## Sheet: venulitis
Purpose: quantify endovenular inflammation												Scoring system
10 40X fields												0	none
												1	0-25% circumference with >1 leukocyte cell layer
	field											2	26-50% circumference with >1 leukocyte cell layer
Mouse	1	2	3	4	5	6	7	8	9	10	Mean	3	50-100% circumference with >1 leukocyte cell layer
M1.2	0	0	0	1	0	0	1	1	3	3	0.9
M2.2	0	0	1	0	1	0	0	2	0	1	0.5
M3.2	1	1	0	0	1	0	0	1	2	3	0.9
F1.2	0	0	0	0	0	1	2	1	0	3	0.7
F2.2	0	1	2	1	0	1	1	0	2	2	1
F3.2	0	0	1	1	1	1	0	0	0	0	0.4
M1.4	0	0	1	1	0	1	0	0	0	0	0.3
M2.4	1	1	0	0	0	0	0	0	0	0	0.2
M3.4	0	1	0	0	0	0	0	0	0	0	0.1
F1.4	0	1	0	1	1	0	0	0	1	1	0.5
F2.4	0	0	0	1	0	1	1	0	0	0	0.3
F3.4	1	1	1	0	1	0	0	0	0	0	0.4
M1.6	0	0	0	0	0	0	0	0	0	0	0
M1.7	0	0	0	0	0	0	0	0	0	0	0
M2.7	0	0	0	0	0	1	1	0	0	0	0.2
F1.5	0	0	0	1	0	0	0	0	0	0	0.1
F1.7	0	0	0	0	0	1	1	0	0	0	0.2
F2.7	1	1	0	0	1	0	0	0	0	1	0.4
F3.7	1	0	1	0	1	0	0	0	1	1	0.5
M1.M	0	0	0	0	0	0	0	0	0	0	0
M2.M	0	0	0	0	0	0	0	0	1	0	0.1
M3.M	0	0	0	0	0	0	0	0	0	0	0
F1.M	0	0	0	0	0	0	0	0	0	0	0
F2.M	0	0	0	0	0	1	1	0	0	0	0.2
F3.M	0	0	0	0	0	0	0	0	0	0	0
BL6 1.7											#DIV/0!

## Sheet: perivenule inflammation
Purpose: quantify perivenular inflammation												Scoring system
10 40X fields												0	none
												1	0-25% circumference with >1 leukocyte cell layer
	field											2	26-50% circumference with >1 leukocyte cell layer
Mouse	1	2	3	4	5	6	7	8	9	10	Mean	3	50-100% circumference with >1 leukocyte cell layer
M1.2	1	1	1	3	1	1	3	0	1	3	1.5
M2.2	3	2	3	2	2	3	2	3	3	2	2.5
M3.2	2	1	3	0	0	0	0	1	1	1	0.9
F1.2	2	0	3	1	2	0	2	1	3	1	1.5
F2.2	2	3	3	1	1	1	3	2	3	2	2.1
F3.2	1	3	3	2	3	3	3	2	0	1	2.1
M1.4	3	0	0	1	1	3	3	0	2	0	1.3
M2.4	1	2	1	2	1	0	3	2	1	2	1.5
M3.4	2	3	2	1	2	2	1	2	3	3	2.1
F1.4	3	1	2	3	3	1	0	0	1	2	1.6
F2.4	1	1	1	3	2	1	3	2	2	2	1.8
F3.4	2	2	2	1	3	1	0	0	1	1	1.3
M1.6	1	1	1	1	1	3	3	3	1	3	1.8
M1.7	0	0	0	1	0	1	0	2	0	1	0.5
M2.7	1	3	1	3	1	3	3	2	1	1	1.9
F1.5	1	0	2	1	1	0	1	1	0	0	0.7
F1.7	2	2	1	1	1	3	3	3	3	2	2.1
F2.7	3	3	3	1	3	1	1	1	1	3	2
F3.7	3	3	3	3	3	2	1	1	3	3	2.5
M1.M	0	0	0	0	0	0	2	1	0	1	0.4
M2.M	1	1	0	0	0	3	2	1	3	0	1.1
M3.M	0	0	0	0	0	1	0	0	0	0	0.1
F1.M	1	1	2	2	3	2	2	3	2	2	2
F2.M	0	1	1	0	2	2	3	2	1	0	1.2
F3.M	0	0	0	0	0	0	1	0	0	0	0.1
BL6 1.7											#DIV/0!

## Sheet: interstitial lymphocytic pneum
Purpose: interstital (alveolar sepate) inflammation												Scoring system
10 10X fields												state percentage of pulmonary alveolar parenchyma with septae expanded by leukocyte
	Pathologist
Mouse	1	2	3	4	5	6	7	8	9	10	Mean
M1.2	0.05	0.02	0.05	0.02	0.01	0.03	0.01	0.01	0.01	0	0.021
M2.2	0.02	0.02	0	0.02	0.02	0	0	0.05	0.01	0.02	0.016
M3.2	0	0	0	0.02	0.03	0	0.01	0.01	0	0	0.007
F1.2	0.05	0.04	0	0	0.01	0.02	0.02	0	0.02	0.01	0.017
F2.2	0.02	0.02	0.05	0.01	0	0	0.05	0.03	0.01	0.02	0.021
F3.2	0	0.01	0.05	0.03	0.02	0	0	0.02	0.02	0	0.015
M1.4	0	0	0.01	0.01	0.02	0.01	0.01	0.02	0.03	0	0.011
M2.4	0.02	0.03	0.02	0.01	0	0	0.01	0.01	0	0.02	0.012
M3.4	0.05	0.02	0.01	0.02	0.02	0.01	0.02	0.02	0.02	0	0.019
F1.4	0.02	0.01	0	0	0	0.01	0.03	0.02	0.01	0.01	0.011
F2.4	0.02	0.1	0.03	0.02	0.01	0	0.02	0.04	0.06	0.01	0.031
F3.4	0.01	0.01	0	0.04	0	0	0	0	0	0.01	0.007
M1.6	0	0	0.01	0	0.01	0.02	0.01	0	0	0.01	0.006
M1.7	0.05	0.03	0.02	0.01	0	0.01	0	0.01	0	0	0.013		prominent interstitial foam cells adjacent to adenoma
M2.7	0.05	0.02	0.02	0.5	0.7	0.5	0.1	0.03	0.02	0.25	0.219
F1.5	0	0	0	0	0.01	0	0	0.03	0.02	0.01	0.007
F1.7	0.03	0.08	0.1	0.02	0.02	0.03	0.01	0.02	0	0.1	0.041
F2.7	0.02	0.05	0.2	0.5	0.8	0.6	0.4	0.05	0.03	0.04	0.269
F3.7	0.1	0.15	0.1	0.02	0.1	0.05	0.05	0.03	0.05	0.1	0.075
M1.M	0	0	0	0	0.01	0	0	0	0	0	0.001
M2.M	0	0.02	0.02	0.03	0	0	0	0	0.02	0.01	0.01
M3.M	0	0	0	0	0	0	0	0	0	0	0
F1.M	0	0.01	0.03	0.02	0	0.03	0	0.02	0	0.01	0.012
F2.M	0.01	0.01	0	0	0	0	0	0	0	0.01	0.003
F3.M	0	0	0	0	0	0	0	0	0	0	0
BL6 1.7											#DIV/0!

## Sheet: pulmonary edema
Purpose: interstital (alveolar sepate) inflammation												Scoring system
10 10X fields												state percentage of pulmonary alveolarairspaces filled with edema (eosinophilic material)
	Pathologist
Mouse	1	2	3	4	5	6	7	8	9	10	Mean
M1.2	0	0	0	0	0	0	0	0	0	0	0
M2.2	0	0	0	0	0	0	0	0	0	0	0
M3.2	0	0	0	0	0	0	0	0	0	0	0
F1.2	0	0	0	0	0	0	0	0	0	0	0
F2.2	0	0	0	0	0	0	0	0	0	0	0
F3.2	0	0.2	0.3	0	0.4	0	0	0	0	0	0.09		flocculent edema
M1.4	0.9	0.6	0.2	0.1	0	0	0	0	0	0	0.18		flocculent edema
M2.4	0.1	0	0	0	0	0	0	0	0.7	0.3	0.11		flocculent edema
M3.4	0	0	0.05	0	0.5	0	0	0	0.6	0.4	0.155		flocculent edema, focal inspisated edema
F1.4	0	0	0	0	0	0	0	0	0.5	0.4	0.09		flocculent edema
F2.4	0.1	0	0	0	0	0	0.05	0	0.7	0	0.085		flocculent edema
F3.4	0	0	0	0.05	0	0	0	0	0	0	0.005
M1.6	0.5	0.7	0	0	0	0	0	0	0	0	0.12		flocculent edema
M1.7	0	0.2	0.3	0.1	0	0	0	0	0	0.4	0.1		flocculent edema
M2.7	0.3	0.2	0.9	0.7	0.3	0.2	0.1	0.1	1	0.9	0.47		flocculent edema, and inspisated edema
F1.5	0	0	0	0	0	0.5	0	0	0	0	0.05		flocculent edema, and inspisated edema
F1.7	0.5	0.25	0.4	0	0.5	0.1	0	0	0	0.05	0.18		flocculent edema, and inspisated edema
F2.7	0.1	0.05	0.03	0	0	0.05	1	1	0.8	0.05	0.308		flocculent edema, and inspisated edema
F3.7	0.05	0.1	0.05	0	0.15	0.6	0.1	0	0	0.6	0.165		flocculent edema, and inspisated edema
M1.M	0	0	0	0	0	0	0	0	0	0	0
M2.M	0	0	0	0	0	0	0	0	0	0	0
M3.M	0	0	0	0	0	0	0	0	0	0	0
F1.M	0	0	0	0	0	0	0	0	0	0	0
F2.M	0	0	0	0	0	0	0	0	0	0	0
F3.M	0	0	0	0	0	0	0	0	0	0	0
BL6 1.7											#DIV/0!
