# Supplementary material for: A C57BL/6 Mouse Model of SARS-CoV-2 Infection Recapitulates Age- and Sex-Based Differences in Human COVID-19 Disease and Recovery
Source: Vaccines (Basel). 2022 Dec 25;11(1):47. doi: 10.3390/vaccines11010047 (PMC9860616; doi:10.3390/vaccines11010047)
Supplement: Supplementary file 1 [file vaccines-11-00047-s001.zip › Supplemental Table S8.xlsx]

## Sheet: Sheet1
	Customer Identifier	Accession	Position	Target Sequence	Tm CP	Tm RP	Flags	HUGO Gene	NSID	Design Remarks
1	ABCF1	NM_013854.1	876-975	GAGGTGTCTTCCCGCCAGGCAATGTTAGAAAATGCATCTGACATTAAGTTGGAAAAGTTCAGCATCTCCGCCCACGGCAAGGAGCTATTCGTCAATGCTG	79	83	HK	Abcf1	NM_013854.1:875
2	ACTB	NM_007393.1	816-915	CAGGTCATCACTATTGGCAACGAGCGGTTCCGATGCCCTGAGGCTCTTTTCCAGCCTTCCTTCTTGGGTATGGAATCCTGTGGCATCCATGAAACTACAT	81	79	HK; X	Actb	NM_007393.1:815	also targets Lrrc58 (NM_177093) @ 97% and predicted gene 4750, Gm4750 (NR_152261) @ 93%
3	Ccl12	NM_011331.1	1-100	TTTCGAAGTCTTTGACCTCAACATGAAGATTTCCACACTTCTATGCCTCCTGCTCATAGCTACCACCATCAGTCCTCAGGTATTGGCTGGACCAGATGCG	73	86		Ccl12	NM_011331.1:0
4	CCL3	NM_011337.1	61-160	TCTGTCACCTGCTCAACATCATGAAGGTCTCCACCACTGCCCTTGCTGTTCTTCTCTGTACCATGACACTCTGCAACCAAGTCTTCTCAGCGCCATATGG	82	80		Ccl3	NM_011337.1:60
5	CCL4	NM_013652.1	141-240	TTCTCAGCACCAATGGGCTCTGACCCTCCCACTTCCTGCTGTTTCTCTTACACCTCCCGGCAGCTTCACAGAAGCTTTGTGATGGATTACTATGAGACCA	81	81		Ccl4	NM_013652.1:140
6	CXCL10	NM_021274.1	116-215	AGGACGGTCCGCTGCAACTGCATCCATATCGATGACGGGCCAGTGAGAATGAGGGCCATAGGGAAGCTTGAAATCATCCCTGCGAGCCTATCCTGCCCAC	82	81		Cxcl10	NM_021274.1:115
7	DDX58	NM_172689.3	1752-1851	GTACACATCACATTTGCGGAAATACAACGATGCACTCATCATCAGTGAGGATGCACAGATGACAGACGCTCTAAATTACCTCAAAGCCTTCTTCCACGAT	81	82		Ddx58	NM_172689.3:1751
8	DHX58	NM_030150.2	951-1050	TTTGCGGCGCTACAATGATGCGCTATTTATCCACGATACTGTCCGTGCCCGGGACGCCCTTGACATGTTGCAAGATTTTTACGACAGAGAACGCACCACA	81	82		Dhx58	NM_030150.2:950
9	EIF2AK2	NM_011163.4	2446-2545	CATGCATTGTGTTCTGATCCCACTCTGAACCCTCTGCCATTCATGCCTTGTCTGTCATGTGAACTGTTGCCTCTGAATGTGGGGGTCCAAATTAACCCTC	80	82		Eif2ak2	NM_011163.4:2445
10	GAPDH	NM_001001303.1	891-990	AGGTTGTCTCCTGCGACTTCAACAGCAACTCCCACTCTTCCACCTTCGATGCCGGGGCTGGCATTGCTCTCAATGACAACTTTGTCAAGCTCATTTCCTG	81	79	HK; X	Gapdh	NM_001001303.1:890	also targets Gapdh-ps15, Gm5069, Gm5177, Gm5523, Gm6498, Gm6981 and Gm12070 @ >93%
11	GBP2	NM_010260.1	1997-2096	GAGCATCTTCAGGCTTTGAAACAACTGCTATGAAACTCAATTCACCTCAGCTCAAAATCAATCATATGCGACTCCATTTTGGGGTCACTGTCTGACCACT	80	79		Gbp2	NM_010260.1:1996
12	GBP1	NM_010259.2	167-266	ATCCTGTCTGCTATCCAAAATCCTGTGGTGGTCGTAGCAATAGTGGGCTTCTACCACACAGGCAAATCCTATCTGATGAATAAGCTGGCTGGAAAGCAGA	83	83		Gbp2b	NM_010259.2:166
13	HPRT1	NM_013556.2	31-130	TGCTGAGGCGGCGAGGGAGAGCGTTGGGCTTACCTCACTGCTTTCCGGAGCGGTAGCACCTCCTCCGCCGGCTTCCTCCTCAGACCGCTTTTTGCCGCGA	82	82	HK	Hprt	NM_013556.2:30
14	IFI44	NM_133871.2	991-1090	CTGACAGATACCAGTTCGATTCCATGAAACCAATCACATCAAACCATCCGAACTATACCCATGACCCACTGCTGAAGGACAGAATTCACTGTGTGGTTTT	79	83		Ifi44	NM_133871.2:990
15	IFIH1	NM_027835.2	1998-2097	GCTGCTAAAGACGGAAATCGCAAAGATCGCGTCTGTGCAGAACATTTGAGGAAGTACAACGAAGCCCTACAAATCAACGACACGATCCGAATGATTGATG	83	83		Ifih1	NM_027835.2:1997
16	Gm14446	NM_001101605.1	75-174	GTGAGTGCAAAATCTCATAGTTGTCTCATCTATGACAGCCTGGTTGAGCTGAGATGCCATTTCACATGGAAGTTGGTTATAGAAAAGGTTGACATGCCTG	80	79		Ifit1bl1	NM_001101605.1:74
17	IFIT2	NM_008332.2	231-330	ACAACGAGTAAGGAGTCACTGGAGAGCAATCTGCGACAGCTAAAATGCCATTTCACCTGGAACCTGATAGCAGAAGATGAGTCCTTGGATGAGTTTGAGG	82	80		Ifit2	NM_008332.2:230
18	IFITM1	NM_001112715.1	413-512	CCTCCACCGCCAAGTGCCTGAACATCAGCTCCCTGTTCTTCACCATCCTCACGGCCATCGTCGTCATCGTTGTCTGTGCCATTAGATGATGTGAGATGTC	83	79		Ifitm1	NM_001112715.1:412
19	Ifna11	NM_008333.2	544-643	AGCAGAAGTCTGGAGAGCCCTGTCTTCCTCTGCCAATGTGCTGGGAAGACTGAGAGAAGAGAAGGCTTGAGTCCTGAGACCAAGTGTGGAGAGTCCTCCC	86	86		Ifna11	NM_008333.2:543
20	IFNA2	NM_010503.2	90-189	TAACCTCAGGAACAAGAGGGCCTTGAAGGTCCTGGCACAGATGAGGAGGCTCCCCTTTCTCTCCTGCCTGAAGGACAGGCAGGACTTTGGATTCCCCCTG	87	84	X	Ifna2	NM_010503.2:89	also targets Ifna11 (NM_008333) @ 92%
21	IFNAR1	NM_010508.1	1196-1295	TGGGAAAACACTTCCAATACTAAGATAAGCATGGAGAAGGATGGCCCAGAGTTCACCCTCAAGAACCTGCAGCCGCTGACTGTGTACTGTGTCCAGGCCA	80	82		Ifnar1	NM_010508.1:1195
22	IFNAR2	NM_001110498.1	726-825	TCCTCTTGAGCCGCCAGAATTTGAGATCGTTGGCTTTACAGACCACATAAACGTGACGATGGAATTTCCACCTGTCACTTCCAAAATAATCCAGGAAAAG	80	80		Ifnar2	NM_001110498.1:725
23	IFNB1	NM_010510.1	336-435	GATGAACTCCACCAGCAGACAGTGTTTCTGAAGACAGTACTAGAGGAAAAGCAAGAGGAAAGATTGACGTGGGAGATGTCCTCAACTGCTCTCCACTTGA	79	82		Ifnb1	NM_010510.1:335
24	IFNGR1	NM_010511.2	986-1085	AAGCATAATGTTACCTAAGTCCTTGCTCTCTGTGGTAAAAAGTGCCACGTTAGAGACAAAACCTGAATCGAAGTATTCACTTGTCACACCGCACCAGCCA	80	82		Ifngr1	NM_010511.2:985
25	IFNL2	NM_001024673.2	73-172	GCCACCAGGCTCCCAGTGGAAGCAAAGGATTGCCACATTGCTCAGTTCAAGTCTCTGTCCCCAAAAGAGCTGCAGGCCTTCAAAAAGGCCAAGGATGCCA	85	86	X	Ifnl2	NM_001024673.2:72	also targets Ifnl3 transcripts @ 99%
26	IFNL3	NM_177396.1	100-199	GATTGCCACATTGCTCAGTTCAAGTCTCTGTCCCCAAAAGAGCTGCAGGCCTTCAAAAAGGCCAAGGGTGCCATCGAGAAGAGGCTGCTTGAGAAGGACA	85	85	X	Ifnl3	NM_177396.1:99	also targets Ifnl2 transcripts @ 99%
27	IL18	NM_008360.1	271-370	ACTTTGGCCGACTTCACTGTACAACCGCAGTAATACGGAATATAAATGACCAAGTTCTCTTCGTTGACAAAAGACAGCCTGTGTTCGAGGATATGACTGA	75	74		Il18	NM_008360.1:270
28	IL1A	NM_010554.4	226-325	ACCTCTGAAACGTCAAAGATGTCCAACTTCACCTTCAAGGAGAGCCGGGTGACAGTATCAGCAACGTCAAGCAACGGGAAGATTCTGAAGAAGAGACGGC	79	81		Il1a	NM_010554.4:225
29	IL1B	NM_008361.3	1121-1220	GTTGATTCAAGGGGACATTAGGCAGCACTCTCTAGAACAGAACCTAGCTGTCAACGTGTGGGGGATGAATTGGTCATAGCCCGCACTGAGGTCTTTCATT	82	80		Il1b	NM_008361.3:1120
30	IL6	NM_031168.1	41-140	CTCTCTGCAAGAGACTTCCATCCAGTTGCCTTCTTGGGACTGATGCTGGTGACAACCACGGCCTTCCCTACTTCACAAGTCCGGAGAGGAGACTTCACAG	82	82		Il6	NM_031168.1:40
31	IRF1	NM_008390.2	846-945	CTCTCTGAGTGGCATATGCAGATGGACATTATACCAGATAGCACCACTGATCTGTATAACCTACAGGTGTCACCCATGCCTTCCACCTCCGAAGCCGCAA	86	87		Irf1	NM_008390.2:845
32	IRF2	NM_008391.2	441-540	GCCATGAATTCCCTGCCCGACATTGAGGAAGTGAAGGACAGAAGCATAAAGAAAGGAAACAACGCCTTCAGAGTCTACCGGATGCTGCCCTTATCCGAAC	80	80		Irf2	NM_008391.2:440
33	IRF5	NM_001252382.1	491-590	CCCTTAACAAAAGCCGTGACTTCCAGCTGTTCTATGATGGCCCTCGGGACATGCCACCTCAGCCGTACAAGATCTACGAGGTCTGCTCCAACGGCCCTGC	82	82		Irf5	NM_001252382.1:490
34	IRF7	NM_016850.2	706-805	CGCTGTGCACTCCACAGCACAGGGCGTTTTATCTTGCGCCAAGACAATTCAGGGGATCCAGTTGATCCGCATAAGGTGTACGAACTTAGCCGGGAGCTTG	81	82		Irf7	NM_016850.2:705
35	ISG15	NM_015783.3	390-489	TATGAGGTCTTTCTGACGCAGACTGTAGACACGCTTAAGAAGAAGGTGTCCCAGCGGGAACAAGTCCACGAAGACCAGTTCTGGCTGAGCTTCGAGGGAA	83	86		Isg15	NM_015783.3:389
36	ISG20	NM_020583.5	553-652	AAGCTGGTGGTGGGCCATGACCTGAAGCACGACTTCAATGCCCTGAAGGAGGATATGAGCAAGTACACCATCTATGACACGTCCACAGACAGGCTGCTGT	83	82		Isg20	NM_020583.5:552
37	MX1	NM_010846.1	2486-2585	ACAAGGATTCCACCTCTCTTTTAGCCCACCACCCATCAGAGGTAGTGGAAGAGAAAAGTTATTAGGCTATGGAGGAAGTGGACCTGTTCAGCAATAGTTC	82	81		Mx1	NM_010846.1:2485
38	MX2	NM_013606.1	2096-2195	TGTCCTTCCCTGTGTTTCCTGGATTGTGATTCAGGGACAGAAGGGCTCCTGCCTTTCCTGGTAGCTATACCACCAGCCTTTATGCTCTGATAAGTGCTAG	82	81		Mx2	NM_013606.1:2095
39	NLRP3	NM_145827.3	509-608	ACGTGTACATCACATTCCTCTATGGTATGCCAGGAGGACAGCCTTGAAGAAGAGTGGATGGGTTTGCTGGGATATCTCTCCCGCATCTCCATTTGTAAAA	82	80		Nlrp3	NM_145827.3:508
40	OAS1b	NM_001083925.1	1171-1270	TTTGGGAAGACTTCATCTGGATAGCCCAGAGTGTCTTGGATATTGCCATCCTCCTGCCTTAGCGCTGGCATGACTGCAGCGTAGGCCTGTTATGCTCTGC	81	86		Oas1b	NM_001083925.1:1170
41	PGK1	NM_008828.3	886-985	TAAGGTGCTCAACAACATGGAGATTGGCACATCTCTGTATGATGAAGAAGGAGCCAAGATTGTCAAAGATCTCATGTCCAAAGCTGAGAAAAATGGTGTG	82	82	HK	Pgk1	NM_008828.3:885
42	RSAD2	NM_021384.2	3186-3285	TGCTGGGAGAATAGGGGATGATCTAGTGGACATTTGTTAAGTGTTACAGGCTGATGCCTTGTGTCCCATGACTGATTGATGCAGAGTAGTAATGCTGTGA	80	81		Rsad2	NM_021384.2:3185
43	SDHA	NM_023281.1	251-350	CTTGCGAGCTGCATTTGGCCTTTCTGAGGCAGGGTTTAATACTGCATGCCTTACAAAGCTCTTTCCTACCCGATCACATACTGTTGCAGCACAGGGAGGT	82	82	HK	Sdha	NM_023281.1:250
44	TLR3	NM_126166.2	1166-1265	TTTCTCTGGGCTGAAGTGGACAAATCTCACCCAGCTCGATCTTTCCTACAACAACCTCCATGATGTCGGCAACGGTTCCTTCTCCTATCTCCCAAGCCTG	78	81		Tlr3	NM_126166.2:1165
45	TLR4	NM_021297.2	2511-2610	AACGGCAACTTGGACCTGAGGAGAACAAAACTCTGGGGCCTAAACCCAGTCTGTTTGCAATTAATAAATGCTACAGCTCACCTGGGGCTCTGCTATGGAC	81	79		Tlr4	NM_021297.2:2510
46	TLR7	NM_133211.3	3211-3310	TCTGCAGGAGCTCTGTCCTTGAGTGGCCTGCAAATCCACAGGCTCACCCATACTTCTGGCAGTGCCTGAAAAATGCCCTGACCACAGACAATCATGTGGC	82	83		Tlr7	NM_133211.3:3210
47	TNF	NM_013693.2	515-614	TGGATCTCAAAGACAACCAACTAGTGGTGCCAGCCGATGGGTTGTACCTTGTCTACTCCCAGGTTCTCTTCAAGGGACAAGGCTGCCCCGACTACGTGCT	85	85		Tnf	NM_013693.2:514
48	TNFRSF1B	NM_011610.3	1174-1273	ATTTCAGATTCTTCCCACGGAAGCCACGGGACCCACGTCAACGTCACCTGCATCGTGAACGTCTGTAGCAGCTCTGACCACAGTTCTCAGTGCTCTTCCC	84	83		Tnfrsf1b	NM_011610.3:1173
49	TRIM25	NM_009546.2	5316-5415	TGAGGTCAGCCCAAGACTTCTGTGAATCCTGTCTACAGATGATGGTTCAATTCCAGCTCCAGTTGAGACCTAGTGCAATTTCCCTGCAGATGAACACATA	82	82		Trim25	NM_009546.2:5315
