# Supplementary material for: A C57BL/6 Mouse Model of SARS-CoV-2 Infection Recapitulates Age- and Sex-Based Differences in Human COVID-19 Disease and Recovery
Source: Vaccines (Basel). 2022 Dec 25;11(1):47. doi: 10.3390/vaccines11010047 (PMC9860616; doi:10.3390/vaccines11010047)
Supplement: Supplementary file 1 [file vaccines-11-00047-s001.zip › Supplemental Table S9.csv]

	sample_001	sample_002	sample_003	sample_004	sample_005	sample_006	sample_007	sample_008	sample_009	sample_010	sample_011	sample_012	sample_013	sample_014	sample_015	sample_016	sample_017	sample_018	sample_019	sample_020	sample_021	sample_022	sample_023	sample_024	sample_025	sample_026	sample_027	sample_028	sample_029	sample_030	sample_031	sample_032	sample_033	sample_034	sample_035	sample_036	sample_037	sample_038	sample_039	sample_040	sample_041	sample_042	sample_043	sample_044	sample_045	sample_046	sample_047	sample_048	sample_049
IL6	12	9	8	1800	1381	1558	252	343	161	28	32	30	35	17	15	3186	2063	1697	500	663	764	47	66	32	14	14	24	2326	4249	1135	802	838	664	395	142	10	30	47	2611	2008	964	340	277	1008	160	145	11	21	30
CCL4	17	18	7	623	740	2193	233	284	187	155	142	117	36	43	24	860	566	483	487	715	637	184	383	97	20	17	26	1117	2824	785	445	357	390	644	264	26	24	21	1753	818	907	124	336	577	464	274	60	31	29
IL1B	49	61	33	586	458	686	377	365	217	82	105	121	181	159	137	887	555	626	574	720	865	177	288	103	75	73	106	703	934	242	513	528	544	572	215	101	128	232	697	674	322	169	242	617	273	199	118	199	797
IRF2	1315	1105	634	1392	1709	2261	1208	1216	1089	1069	1027	1166	2353	2077	2183	3019	1891	2280	1620	1795	2997	1535	2232	1025	1552	1581	1251	1696	2940	1327	1630	1603	1560	1751	1019	2001	1800	1468	2649	1361	1035	1144	1143	1802	1447	1226	1693	735	2060
Ifna11	5	2	0	4	7	13	8	4	4	5	6	1	7	6	2	6	7	12	7	10	17	3	5	3	2	2	3	9	14	8	8	7	6	5	7	2	7	4	22	11	4	3	4	10	4	6	2	1	8
MX1	287	283	141	5218	7266	11472	1518	1770	1180	532	551	553	569	482	498	9877	6227	6841	2270	2719	4190	716	1056	514	406	397	370	8453	17953	8810	2308	2139	1964	2079	846	551	532	384	13504	6457	4512	1110	1323	2297	1224	711	966	295	635
CXCL10	32	26	12	23127	26850	39361	2515	2211	1604	566	662	577	69	179	34	39266	25729	24089	4570	6616	7121	805	1655	419	32	36	65	34649	60687	22498	5392	4407	4739	8131	4370	44	53	32	36588	28835	18091	1422	2289	5030	4487	2515	46	93	74
DDX58	1203	1028	614	6122	7699	9858	4133	4139	3189	1568	1681	1613	2227	2044	2099	12325	7410	9137	5279	6280	9227	2354	3411	1408	1845	1673	1346	8242	13908	6324	5837	5166	4961	4063	2399	1974	1850	1472	12480	6795	4658	2892	3064	5080	3301	2324	2626	803	2205
IRF7	162	170	88	10925	11971	21738	7938	9197	6137	1690	1723	1517	480	573	340	20693	12957	14931	12642	15827	19566	2353	3457	1242	263	231	194	18162	31032	19105	11653	10702	11914	7660	4256	314	317	352	28916	13808	9338	9660	10828	13908	7100	3756	778	181	574
IFIH1	994	893	480	7278	8944	11941	3730	3607	2718	1229	1271	1296	1920	1774	1801	14053	8797	10183	5070	5551	8092	1896	2764	1185	1451	1425	1038	9723	18098	7309	5255	5022	4692	4018	2058	1588	1466	1035	13976	7363	4891	2472	2837	5624	2426	1574	1837	607	1917
IFITM1	1732	1428	983	3228	3690	3632	3677	5378	3392	1745	1832	2489	4251	3021	3390	5675	3730	5378	5713	8445	10526	2740	4258	1904	2364	2189	2351	4424	8802	4543	6103	5867	6123	5083	2600	3438	4017	3303	10991	3828	2767	2858	3989	6428	5306	3647	1923	908	3956
IFNAR1	2055	1962	1085	1139	1522	1904	2607	2830	2393	2457	2236	2336	3692	3402	3531	2779	1650	1945	3612	3774	6232	3509	4998	2128	2908	2728	2361	1733	2353	1226	3453	3380	3124	3632	2428	3439	3468	2649	2619	1519	1062	2408	2422	3781	3117	2736	2388	1273	3587
IFNL2	5	4	3	24	38	77	9	3	3	5	2	4	5	11	6	64	33	42	16	24	26	3	8	10	4	6	9	75	140	93	14	12	16	13	15	7	7	6	109	51	39	11	5	15	13	7	5	9	7
Ccl12	56	36	15	442	572	1097	288	386	176	140	146	122	82	68	49	832	557	458	689	845	825	153	230	100	42	50	48	754	1669	877	501	471	487	843	332	68	68	53	1303	550	399	255	366	948	617	339	32	42	103
ISG15	293	291	148	25388	29115	42986	9971	11275	6445	1193	1315	1093	920	840	615	52299	35060	33258	17898	22056	24946	1936	2509	996	506	430	346	37963	68989	36759	15569	13797	16519	10366	6399	612	629	614	60541	30502	21885	11175	12118	15718	8162	3954	943	208	881
RSAD2	176	172	72	24748	34273	50832	4020	3921	2607	536	563	639	391	396	314	42712	25731	28391	6068	7147	10130	961	1398	515	214	284	239	37378	79097	31010	6595	6254	5476	5718	2857	382	383	240	48281	25491	19102	2379	3054	6215	2486	1436	760	132	473
ISG20	1237	1062	584	9199	10416	17119	3864	3775	2696	1375	1480	1473	2242	1952	2153	15763	10320	11942	4985	6561	8017	1992	2599	1318	1769	1825	1374	13917	24769	12766	5058	4382	4858	3824	2357	2031	2301	1694	23141	10614	6952	3356	3555	4938	3508	2529	1415	628	2484
GBP2	1601	1314	633	13690	18620	32347	4977	4938	3748	2499	2962	2968	2758	3023	2834	24614	14857	17269	8223	8744	12902	3959	6914	2292	2005	2371	1362	24317	46107	19869	7014	5712	7556	20024	6589	2742	2497	1826	36589	15330	10943	2802	4234	5774	10758	6154	3148	1013	2350
DHX58	74	68	35	2060	2535	3473	1098	1358	834	244	264	186	230	182	149	3839	2268	2626	1656	1962	2581	361	567	137	149	113	67	2766	4920	2713	1426	1279	1429	1054	514	163	124	103	4361	1830	1605	825	984	1510	820	383	243	61	236
IL18	732	577	339	658	963	1497	566	618	507	480	675	648	1434	953	1168	1104	663	771	654	857	1150	751	982	596	1082	1011	636	795	1599	707	779	988	871	534	357	1181	1835	663	1227	598	548	705	532	1456	417	354	879	321	1368
TRIM25	1102	1005	482	1938	2624	3368	2148	2353	1754	1167	1174	1142	2080	1884	1980	4128	2614	3252	2681	3036	4724	1405	2218	1057	1623	1550	1253	2749	4708	2786	2694	2739	2265	2046	1591	2036	2052	1436	4476	2328	1624	1732	1641	3049	1839	1302	1481	626	2279
NLRP3	63	48	24	96	121	223	90	92	70	70	71	61	129	109	87	170	131	136	151	196	255	120	171	63	89	70	68	153	223	141	145	156	128	166	130	104	74	88	249	113	135	100	94	174	134	132	42	54	127
IFIT2	640	598	288	33071	39556	60787	5768	5755	3952	1212	1254	1242	1142	1171	1076	62285	39334	41974	8765	9797	14038	1804	2647	1057	891	925	670	51130	100770	38512	8354	7921	8886	11431	6074	898	839	691	71358	36669	21808	3881	5037	8888	5251	2804	1796	387	1176
TLR3	151	90	49	631	787	1117	358	365	268	128	123	136	230	195	206	1281	751	878	451	456	744	220	331	92	207	172	134	990	1828	803	509	442	456	365	191	203	170	126	1477	669	393	186	244	472	225	171	119	65	286
TNF	30	31	17	186	192	521	124	147	90	103	99	65	78	68	49	322	194	168	246	244	481	131	277	57	51	55	44	328	618	238	180	137	161	353	185	43	35	48	404	215	284	82	140	229	264	186	41	30	77
CCL3	41	35	17	749	718	1772	330	365	271	194	168	120	91	105	64	993	616	623	578	856	867	240	460	129	76	81	66	1004	2317	618	512	438	482	601	210	72	53	53	1642	865	694	185	413	654	446	263	36	49	94
TNFRSF1B	687	593	288	1537	1846	3829	1455	1882	1227	1432	1395	1112	1323	1159	1133	2529	1569	1853	2269	2505	3982	1870	3275	1071	908	1021	796	2087	4183	1938	2184	1990	1887	2393	1857	1138	1209	1089	3459	1669	1431	1475	1748	2570	2860	1993	883	760	1738
IFNA2	5	5	2	34	60	88	13	16	12	8	4	7	9	10	8	69	55	56	17	19	38	11	11	3	7	6	7	88	190	85	10	9	15	10	8	9	9	4	103	64	59	20	12	19	12	16	3	4	9
Gm14446	124	119	50	6296	8354	15700	956	1428	742	485	461	445	301	302	274	11456	7497	7027	1719	2124	2999	617	963	398	187	211	152	9036	23180	9427	1813	1572	2242	1091	488	210	211	191	17603	6631	5519	525	989	1534	970	626	4177	127	348
MX2	44	57	24	2072	2715	3476	602	652	426	121	119	118	134	97	118	4068	2609	3158	850	1059	1463	161	203	89	67	72	61	3216	6083	2839	962	810	804	559	437	115	101	97	4256	2606	1804	427	542	839	430	189	105	27	129
GBP1	6	7	5	26	33	89	11	25	12	15	18	19	14	39	17	45	31	25	15	16	83	27	45	19	10	11	16	36	113	76	16	21	18	111	42	21	23	13	86	23	26	16	13	29	35	37	15	9	14
IFNL3	5	8	7	87	97	245	15	12	5	6	8	9	5	6	7	175	113	136	17	26	48	7	13	6	4	5	2	255	539	415	15	14	24	11	4	7	7	8	385	169	134	27	18	28	13	9	8	3	3
TLR4	636	559	336	576	663	877	704	709	622	556	633	607	1427	1143	1191	1200	822	926	955	1121	1602	788	1192	593	958	898	743	750	1243	710	990	1074	999	941	483	1255	1145	768	1374	612	427	704	705	1387	702	686	529	432	1216
OAS1b	22	28	13	177	272	363	112	122	94	52	51	53	46	59	40	423	251	306	132	144	282	52	115	39	35	37	33	289	514	277	139	163	130	143	127	53	43	40	444	242	164	96	76	152	93	62	68	17	57
EIF2AK2	301	272	135	1635	2165	2463	1141	1211	831	426	417	452	674	578	579	3668	2425	2437	1494	1614	2963	683	942	384	493	448	337	2391	3796	2055	1576	1485	1361	1252	975	540	542	341	3447	1869	1225	688	787	1593	816	570	489	197	642
IL1A	51	37	17	149	134	189	74	71	44	45	55	51	119	87	61	350	237	136	99	113	141	74	93	41	57	59	54	195	284	82	116	108	112	68	33	83	117	67	214	235	125	55	49	97	54	67	62	33	78
IFNB1	3	3	3	263	292	593	68	42	41	7	4	6	5	10	7	484	308	410	58	169	122	9	13	4	4	1	3	850	1623	629	125	146	75	16	12	7	5	7	936	548	342	81	96	147	13	7	5	1	3
IRF1	1688	1571	762	3638	4561	6593	2012	2147	1731	1777	1864	1874	2658	2660	2643	8180	5012	5172	3142	3686	5794	2303	3983	1512	2166	2196	1677	5701	10943	4887	3007	2760	2842	5876	2383	2423	2451	2154	8593	4168	3496	2094	2501	2870	4138	3076	1928	965	2714
IFNGR1	3284	2902	1526	1888	2005	2261	3301	3253	3086	2968	3096	3059	5608	5036	5416	4202	2552	3357	3959	4384	6519	4458	6564	2897	4271	4233	3363	2614	3073	2064	4620	4859	4317	4485	2932	5657	5225	3594	4474	2112	1368	4386	3342	5297	4684	3376	6327	1945	6333
TLR7	86	56	24	156	186	398	144	192	170	110	120	113	172	102	136	286	211	184	257	292	560	184	281	139	92	87	83	232	437	237	280	282	288	192	92	140	94	74	408	192	133	106	135	262	180	94	157	90	224
IRF5	277	203	143	711	944	1763	575	838	496	495	451	393	546	458	371	1187	762	780	1090	1086	1849	678	1154	332	374	323	330	1038	2231	1040	956	823	798	1022	675	442	508	411	1643	780	731	485	708	1302	903	668	207	318	685
IFI44	246	227	112	9127	11538	14816	5041	5590	3507	705	712	717	661	628	513	21863	13346	16449	7468	8311	11673	1037	1643	609	403	352	275	13703	22119	11912	7443	6197	6530	4077	2103	551	506	376	23461	12941	6195	1966	3064	5398	2931	1240	682	150	523
IFNAR2	877	791	387	765	970	1268	1477	1723	1234	1026	923	997	1515	1433	1334	1843	1127	1215	1867	2286	3115	1319	1985	805	1341	1201	867	1156	1761	1052	1951	1842	1867	1580	659	1507	1307	1050	1832	899	624	1234	1352	1964	1408	1297	958	484	1557
POS_C	2231	1788	1676	1678	2096	2015	2087	2066	2221	2165	2262	2379	4870	5088	4692	3951	3901	3295	4134	4405	4804	3293	4572	5075	4158	4626	3182	4099	3857	4862	3931	3746	3468	3744	2825	5064	5522	4864	4357	2935	2117	4299	3924	4759	4464	4039	1331	4879	5031
POS_A	25104	20660	18118	21220	25376	24555	25266	24196	27367	26000	27451	28742	59556	61229	56897	46105	47470	38529	49766	52769	52933	36876	53930	59898	52717	57660	37568	50448	45068	61194	46684	43675	42510	46572	33717	61414	65604	56274	49129	34040	24636	50230	45913	55497	54139	49456	17668	61953	63126
POS_F	40	36	26	47	45	64	42	53	57	46	38	47	75	109	100	102	97	61	97	84	114	61	97	116	78	100	68	86	98	109	75	69	76	72	55	94	85	95	99	61	53	72	78	93	90	86	28	113	108
POS_D	500	405	365	438	463	485	468	502	533	483	549	560	1102	1109	1075	853	903	758	892	1017	1049	690	983	1152	908	1014	709	924	817	1103	892	823	760	826	647	1168	1287	1082	936	636	470	930	875	1031	985	997	401	1116	1178
POS_B	7005	5922	5418	5989	7142	6885	7064	6822	7741	7417	7862	8261	16354	17207	16304	13268	13276	10825	14326	15049	15012	10651	15440	17391	14479	15806	10534	14690	12451	17736	13165	12263	12044	13058	9543	17020	18358	16230	13907	10103	6857	14538	13242	15926	15517	14070	4462	17483	18394
POS_E	77	64	56	62	74	60	74	77	84	75	83	84	173	181	175	162	134	134	166	136	176	123	174	168	163	170	110	144	145	162	142	127	133	153	102	193	205	178	151	115	82	162	125	181	158	124	37	183	164
NEG_C	4	5	2	4	6	7	6	5	8	3	1	2	4	7	10	8	11	8	8	12	12	7	10	6	3	4	3	9	10	7	4	2	2	6	8	3	4	7	13	7	6	7	3	12	11	6	4	3	11
NEG_D	2	2	3	3	10	10	4	6	5	4	3	4	4	4	8	14	13	12	7	10	10	0	8	5	5	6	0	16	14	11	6	6	7	7	3	9	6	10	19	6	3	2	2	10	5	6	1	5	5
NEG_E	6	6	11	15	9	12	8	13	16	7	15	12	22	32	23	25	18	23	27	26	32	12	15	17	27	23	14	30	37	30	22	24	23	21	9	20	21	19	38	19	17	16	17	26	20	13	4	20	22
NEG_A	8	4	6	12	8	17	8	6	11	5	7	14	19	24	11	19	22	18	17	13	15	18	25	16	16	23	10	20	22	29	26	9	16	14	10	20	14	18	20	17	9	8	10	17	13	17	3	16	13
NEG_H	3	1	1	3	5	7	3	1	3	3	2	3	2	0	1	9	4	9	4	5	9	5	4	3	1	1	2	7	17	6	1	2	4	3	4	1	4	1	12	1	4	3	2	4	2	4	1	1	4
NEG_G	3	1	0	1	5	5	0	3	3	4	1	1	4	3	4	5	7	7	2	4	8	0	6	3	2	0	1	7	9	3	4	5	5	4	4	7	3	5	9	4	3	2	1	7	6	3	1	0	2
NEG_F	11	4	6	14	8	7	13	13	17	13	15	17	21	25	34	23	21	24	23	28	34	11	27	23	24	28	16	34	26	29	18	24	19	18	17	22	26	25	34	20	9	29	19	27	21	23	5	26	31
NEG_B	6	4	5	5	4	8	9	10	9	4	5	7	7	13	11	13	14	8	9	10	16	7	13	10	7	8	2	11	8	7	17	5	10	9	7	11	11	13	5	14	7	16	9	17	5	9	6	6	14
GAPDH	8925	7707	4834	7652	8842	11318	14364	13950	10993	12686	12326	11366	17116	16209	15623	15996	10012	11423	21114	24452	43579	18888	26285	9267	13846	13335	11180	11536	18128	10992	22024	21180	19949	25378	22126	15405	24040	13221	19415	9105	6671	24460	17748	37205	27820	22444	10154	5059	19596
SDHA	1188	1123	628	647	777	854	1109	1034	954	915	937	1079	2258	2141	2118	1526	982	1042	1330	1507	3004	1461	1865	879	1664	1685	1291	911	1259	795	1476	1512	1513	1463	853	2010	2201	1581	1499	789	567	1419	1079	1843	1241	1169	1649	682	2224
ABCF1	303	263	143	184	275	269	331	332	294	281	274	305	532	502	498	441	325	328	419	457	780	386	601	324	421	439	294	336	469	347	505	491	456	545	331	497	499	371	473	271	163	416	299	682	421	422	225	243	585
PGK1	2427	2042	1196	2084	2638	3281	3392	2882	2558	2816	2726	2735	4700	4051	4064	4190	2613	3158	4422	5141	10351	3968	5784	2534	3436	3361	2614	2854	4866	2332	4467	4779	4384	5584	4124	3907	5040	2755	5176	2344	1502	4604	3205	7738	5193	4491	6484	1298	4691
HPRT1	488	396	264	356	418	448	499	475	404	386	449	411	989	771	844	757	546	550	665	802	1081	628	819	449	756	721	561	498	656	420	755	782	741	678	457	821	1018	690	763	368	326	650	538	1019	527	594	651	283	906
ACTB	41600	36937	22454	44497	55149	78549	56241	52387	44374	55878	54670	51847	86383	74132	74555	84584	54625	64577	78845	96240	142824	75068	113516	45311	67191	61086	48426	64285	103376	59610	81005	76605	73129	106280	80447	72636	71192	61859	91156	47691	39957	86447	61635	96207	108966	100965	42918	30567	79623
[truncated: 20 more columns]
