# Supplementary material for: A C57BL/6 Mouse Model of SARS-CoV-2 Infection Recapitulates Age- and Sex-Based Differences in Human COVID-19 Disease and Recovery
Source: Vaccines (Basel). 2022 Dec 25;11(1):47. doi: 10.3390/vaccines11010047 (PMC9860616; doi:10.3390/vaccines11010047)
Supplement: Supplementary file 1 [file vaccines-11-00047-s001.zip › Supplemental Table S10.csv]

gale_id	mouse_strain	age	sex	timepoint	treatment	dose	viral_strain	experiment	Mouse_ID	cage	viral_load	tech_reps	chip
sample_001	c57bl6	10_wk	male	7dpi	mock	0	NA	MADKV20	1M	20_07		a	a
sample_002	c57bl6	10_wk	male	7dpi	mock	0	NA	MADKV20	2M	20_07		a	a
sample_003	c57bl6	10_wk	male	7dpi	mock	0	NA	MADKV20	3M	20_07		a	a
sample_004	c57bl6	10_wk	male	2dpi	infected	10^4	sars-cov2-ma10-r2g	MADKV20	1_2	20_18	9356670967	b	a
sample_005	c57bl6	10_wk	male	2dpi	infected	10^4	sars-cov2-ma10-r2g	MADKV20	2_2	20_18	5883655711	b	a
sample_006	c57bl6	10_wk	male	2dpi	infected	10^4	sars-cov2-ma10-r2g	MADKV20	3_2	20_18	1726657691	b	a
sample_007	c57bl6	10_wk	male	4dpi	infected	10^4	sars-cov2-ma10-r2g	MADKV20	1_4	20_18	26194302.5	c	a
sample_008	c57bl6	10_wk	male	4dpi	infected	10^4	sars-cov2-ma10-r2g	MADKV20	2_4	20_18	7837238.05	c	a
sample_009	c57bl6	10_wk	male	4dpi	infected	10^4	sars-cov2-ma10-r2g	MADKV20	3_4	20_19	12153343.33	c	a
sample_010	c57bl6	10_wk	male	7dpi	infected	10^4	sars-cov2-ma10-r2g	MADKV20	1_7	20_19	533398.87	d	a
sample_011	c57bl6	10_wk	male	7dpi	infected	10^4	sars-cov2-ma10-r2g	MADKV20	2_7	20_19	320391.7	d	a
sample_012	c57bl6	10_wk	male	7dpi	infected	10^4	sars-cov2-ma10-r2g	MADKV20	3_7	20_19	109881.97	d	a
sample_013	c57bl6	10_wk	female	7dpi	mock	0	NA	MADKV20	1M	20_12		e	b
sample_014	c57bl6	10_wk	female	7dpi	mock	0	NA	MADKV20	2M	20_12		e	b
sample_015	c57bl6	10_wk	female	7dpi	mock	0	NA	MADKV20	3M	20_12		e	b
sample_016	c57bl6	10_wk	female	2dpi	infected	10^4	sars-cov2-ma10-r2g	MADKV20	1_2	20_20	669778530.8	f	b
sample_017	c57bl6	10_wk	female	2dpi	infected	10^4	sars-cov2-ma10-r2g	MADKV20	2_2	20_20	5274967629	f	b
sample_018	c57bl6	10_wk	female	2dpi	infected	10^4	sars-cov2-ma10-r2g	MADKV20	3_2	20_20	1595396292	f	b
sample_019	c57bl6	10_wk	female	4dpi	infected	10^4	sars-cov2-ma10-r2g	MADKV20	1_4	20_20	48393620.24	g	b
sample_020	c57bl6	10_wk	female	4dpi	infected	10^4	sars-cov2-ma10-r2g	MADKV20	2_4	20_20	63817278.37	g	b
sample_021	c57bl6	10_wk	female	4dpi	infected	10^4	sars-cov2-ma10-r2g	MADKV20	3_4	20_16	176994983.1	g	b
sample_022	c57bl6	10_wk	female	7dpi	infected	10^4	sars-cov2-ma10-r2g	MADKV20	1_7	20_16	345292.39	h	b
sample_023	c57bl6	10_wk	female	7dpi	infected	10^4	sars-cov2-ma10-r2g	MADKV20	2_7	20_16	1047514.88	h	b
sample_024	c57bl6	10_wk	female	7dpi	infected	10^4	sars-cov2-ma10-r2g	MADKV20	3_7	21_D	86404.16	h	b
sample_025	c57bl6	20_wk	male	7dpi	mock	0	NA	MADKV21	1M	21_D		i	c
sample_026	c57bl6	20_wk	male	7dpi	mock	0	NA	MADKV21	2M	21_D		i	c
sample_027	c57bl6	20_wk	male	7dpi	mock	0	NA	MADKV21	3M	21_S		i	c
sample_028	c57bl6	20_wk	male	2dpi	infected	10^4	sars-cov2-ma10-r2g	MADKV21	1_2	21_S	6983028878	j	c
sample_029	c57bl6	20_wk	male	2dpi	infected	10^4	sars-cov2-ma10-r2g	MADKV21	2_2	21_S	9064093472	j	c
sample_030	c57bl6	20_wk	male	2dpi	infected	10^4	sars-cov2-ma10-r2g	MADKV21	3_2	21_T	5138672683	j	c
sample_031	c57bl6	20_wk	male	4dpi	infected	10^4	sars-cov2-ma10-r2g	MADKV21	1_4	21_T	155063990.2	k	c
sample_032	c57bl6	20_wk	male	4dpi	infected	10^4	sars-cov2-ma10-r2g	MADKV21	2_4	21_T	214640878.5	k	c
sample_033	c57bl6	20_wk	male	4dpi	infected	10^4	sars-cov2-ma10-r2g	MADKV21	3_4	21_U	90153829.61	k	c
sample_034	c57bl6	20_wk	male	7dpi	infected	10^4	sars-cov2-ma10-r2g	MADKV21	1_7	21_U	8914350.05	l	c
sample_035	c57bl6	20_wk	male	7dpi	infected	10^4	sars-cov2-ma10-r2g	MADKV21	2_7	21_U	12803934.73	l	c
sample_036	c57bl6	20_wk	female	7dpi	mock	0	NA	MADKV21	1M	21_E		m	d
sample_037	c57bl6	20_wk	female	7dpi	mock	0	NA	MADKV21	2M	21_E		m	d
sample_038	c57bl6	20_wk	female	7dpi	mock	0	NA	MADKV21	3M	21_O		m	d
sample_039	c57bl6	20_wk	female	2dpi	infected	10^4	sars-cov2-ma10-r2g	MADKV21	1_2	21_O	2974044831	n	d
sample_040	c57bl6	20_wk	female	2dpi	infected	10^4	sars-cov2-ma10-r2g	MADKV21	2_2	21_O	9855207160	n	d
sample_041	c57bl6	20_wk	female	2dpi	infected	10^4	sars-cov2-ma10-r2g	MADKV21	3_2	21_P	961652378.2	n	d
sample_042	c57bl6	20_wk	female	4dpi	infected	10^4	sars-cov2-ma10-r2g	MADKV21	1_4	21_P	162293271.4	o	d
sample_043	c57bl6	20_wk	female	4dpi	infected	10^4	sars-cov2-ma10-r2g	MADKV21	2_4	21_P	90365944.36	o	d
sample_044	c57bl6	20_wk	female	4dpi	infected	10^4	sars-cov2-ma10-r2g	MADKV21	3_4	21_Q	39503194.4	o	d
sample_045	c57bl6	20_wk	female	7dpi	infected	10^4	sars-cov2-ma10-r2g	MADKV21	1_7	21_Q	3601450.73	p	d
sample_046	c57bl6	20_wk	female	7dpi	infected	10^4	sars-cov2-ma10-r2g	MADKV21	2_7	21_Q	5983360.6	p	d
sample_047	c57bl6	2_yr	male	7dpi	mock	0	NA	MADKV23	1M	23_03		q	e
sample_048	c57bl6	2_yr	male	7dpi	mock	0	NA	MADKV23	2M	23_03		q	e
sample_049	c57bl6	2_yr	male	7dpi	mock	0	NA	MADKV23	3M	23_03		q	e
sample_050	c57bl6	2_yr	male	2dpi	infected	10^4	sars-cov2-ma10-r2g	MADKV23	1_2	23_11	7248160084	r	e
sample_051	c57bl6	2_yr	male	2dpi	infected	10^4	sars-cov2-ma10-r2g	MADKV23	2_2	23_11	2658869888	r	e
sample_052	c57bl6	2_yr	male	2dpi	infected	10^4	sars-cov2-ma10-r2g	MADKV23	3_2	23_11	6490376235	r	e
sample_053	c57bl6	2_yr	male	4dpi	infected	10^4	sars-cov2-ma10-r2g	MADKV23	1_4	23_11	454652709	s	e
sample_054	c57bl6	2_yr	male	4dpi	infected	10^4	sars-cov2-ma10-r2g	MADKV23	2_4	23_13	236938314.8	s	e
sample_055	c57bl6	2_yr	male	4dpi	infected	10^4	sars-cov2-ma10-r2g	MADKV23	3_4	23_13	613497971.4	s	e
sample_056	c57bl6	2_yr	male	7dpi	infected	10^4	sars-cov2-ma10-r2g	MADKV23	1_7		65316502.92	t	e
sample_057	c57bl6	2_yr	male	7dpi	infected	10^4	sars-cov2-ma10-r2g	MADKV23	2_7		6005187.38	t	e
sample_058	c57bl6	2_yr	female	7dpi	mock	0	NA	MADKV23	1M	23_04		u	f
sample_059	c57bl6	2_yr	female	7dpi	mock	0	NA	MADKV23	2M	23_04		u	f
sample_060	c57bl6	2_yr	female	7dpi	mock	0	NA	MADKV23	3M	23_04		u	f
sample_061	c57bl6	2_yr	female	2dpi	infected	10^4	sars-cov2-ma10-r2g	MADKV23	1_2	23_12	1331615301	v	f
sample_062	c57bl6	2_yr	female	2dpi	infected	10^4	sars-cov2-ma10-r2g	MADKV23	2_2	23_12	210356377.6	v	f
sample_063	c57bl6	2_yr	female	2dpi	infected	10^4	sars-cov2-ma10-r2g	MADKV23	3_2	23_12	918266880	v	f
sample_064	c57bl6	2_yr	female	4dpi	infected	10^4	sars-cov2-ma10-r2g	MADKV23	1_4	23_12	69758363.06	w	f
sample_065	c57bl6	2_yr	female	4dpi	infected	10^4	sars-cov2-ma10-r2g	MADKV23	2_4	23_12	36057514.45	w	f
sample_066	c57bl6	2_yr	female	4dpi	infected	10^4	sars-cov2-ma10-r2g	MADKV23	3_4	23_17	97782144.44	w	f
sample_067	c57bl6	2_yr	female	7dpi	infected	10^4	sars-cov2-ma10-r2g	MADKV23	1_7	23_17	4544410.39	x	f
sample_068	c57bl6	2_yr	female	7dpi	infected	10^4	sars-cov2-ma10-r2g	MADKV23	2_7	23_18	2854961.13	x	f
sample_069	c57bl6	2_yr	female	7dpi	infected	10^4	sars-cov2-ma10-r2g	MADKV23	3_7	23_18	2315009.54	x	f
